# Supplementary material for: Mapping the language-in-identity configuration in Hong Kong today
Source: Research Square preprint supplement (doi:10.21203/rs.3.rs-5388859/v1), 2025-02-05
Supplement: Supplementary file 1 [file 2f88475baed6dc39d4c77476.xlsx]

## Sheet: 粤语
title	url	content	date	from	in	by	words
粤语夹杂英语 AI识别无难度初创“走少人走的路” 弃北上留港拓展	http://paper.hket.com/article/1961614	温豪夫和李安国，一位是在香港大学从本科直升博士、未毕业已立志创业的内地80后，一位是97年从美国名校回流、为港大的技术转移开山劈石的大学教授。 师生二人创办的人工智能（AI）初创公司Fano Labs（有光科技），研发可处理、分析混合语言及中国方言的语音识别技术，已有亚洲企业客户，最近获李嘉诚旗下的Horizons Ventures（维港投资）出手投资，是其少有相中的香港初创公司。两人冀凭资金扩充团队，加快抢占市场。 “我们的技术能明白混合语言，例如去机场问：Cathay Pacific嘅counter喺边度？又有广东话又英文，有时加上普通话，Siri都听不懂；另外，例如中国不同地方的普通话有不同口音，我们的技术可识别、分析。”港大电机电子系教授李安国说。坐在他身边是28岁的温豪夫——他指导过的博士生，今天是初创公司合伙人。 从港大衍生出来的Fano Labs研发人工智能语音及自然语言处…	2017-12-04	经济日报	要闻	邱婷	1605
辞教职无阻讲解粤语字 Ben Sir：做好当下 突破随顺	http://paper.wenweipo.com/2017/12/29/OT1712290013.htm	人称Ben Sir的欧阳伟豪近期愈来愈多活跃于大荧幕，从客串电视电影角色到广告代言，再到在节目中带团睇楼，以及将于明年一月举办talk show，身兼数职却未见分身乏术。原来他在数月前已辞去教职，丰富自己的荧幕形象之余亦不断尝试新范畴，直面商业化的成功和失败，对于自己深入人心的学者形象，以及剧中“角色加文字”的模式，他则称：“不会为突破而突破，若角色做得好，自然会有观众要求我开拓不同的角色。” Ben Sir明年1月26日将在湾仔伊馆举行《Ben Sir语沟学：18胶送保育港式粗口之门》，并宣布加开1月27日一场。他称这次的talk show虽然是粗口主题，讲粗口保育，但整场两个几钟的演出是一个粗口字也不会讲，将呈现的是更高层次的表演，“以talk show的形式，带出drama的效果，营造演唱会的气氛，达至闹剧的境界。”演出请来独立剧团“好戏量”的创团艺术总监杨秉基做导演，舞台设置巨型…	2017-12-29	文汇报	副刊		2593
香港美女大学生给驻港军人写“粤语情书” 什么事让她难忘	http://www.hkcd.com/content/2017-12/31/content_1075635.html	“亲爱的班长，不知道你还记得我吗?如果不记得也没有关系，我曾经是香港大学生军事生活体验营的学员，也是香港七百万人中，一位默默关注你们的香港女孩。如果不是你们，我也许还像个什么都不会、什么都不知道的小孩一样，不懂得什么是坚守，什么是军人风范。” 2017年夏天，在香港回归迎来20周年的时候，一个香港女孩给驻港部队的官兵们写了一封信，告诉他们自己已经成为香港青少年军总会的一名小教官。而自己的这个决定，正是源于两年前在香港昂船洲军营码头的军事生活体验中，那段与驻港部队深入接触的经历，让她决心帮助更多的香港青少年了解祖国。 我叫黄逸晴，我是香港中文大学的毕业生，我是第五届香港大学生“军事生活体验营”的一名学员，现在体验结束了以后，我就来到了香港青少年军总会担任一个小教官的角色。 2017年6月份写了一封信给我们驻港部队的班长，就为什么会想写这封信，是因为今年7月1号是香港回归祖国20年，也是部队…	2017-12-31	香港商报	即时新闻		1353
【看电视多一个选择】奇妙电视粤语频道5月14日晚启播 主打合家欢娱乐 16:37	http://news.mingpao.com/ins/instantnews/web_tc/article/20170315/s00001/1489566852756	免费电视奇妙电视的粤语频道（77台）将于5月14日晚启播，该台会以高清数码及模拟制式广播；而英语综合频道76台，预计于启播后12个月内投入服务。 奇妙电视主打合家欢娱乐，提供包括娱乐新闻、旅游饮食、生活资讯、自制剧集及亚洲人气剧集、本地及全球热门电影等节目。 奇妙电视的台徽以抽象图形设计，外形似细胞的台徽象征创意无限、跳出框框及满载动力。	2017-03-15	明报	即时港闻		194
苦学粤语 外交部fb小编：想撞爆个头	http://premium.mingpao.com/cfm/Content_News.cfm?Channel=gb&Path=202106646486/gzg1.cfm	【明报专讯】中华人民共和国外交部驻港特派员公署嘅facebook专页，几日前正式上线，吸引好多网民留言，有唔少人趁机留言叫中央唔好钦点下届特首。公署fb专页嘅“小编”噚日出帖，话留言好多，所以好难一一回覆，讲明只会拣有代表性嘅“外交相关问题回覆”。 该fb专页小编又提到，有网民反映话佢哋出post又繁又简，睇到想撞墙。小编就回应话现时苦学粤语中，“真系（系）学到想撞爆个头”，Emily就觉得，如果用“撼头埋墙”，可能更有广东话味道。	2017-03-24	明报	港闻		231
粤语客服机械人 智能对答够贴心	http://www1.hkej.com/dailynews/article/id/1532240/	金融科技和人工智能均属炙手可热的创业范畴，有本地初创公司在数码港支持下，结合上述两项技术提供服务，今年荣获香港资讯及通讯科技奖（HKICT Awards）嘉许。 刚夺得最佳金融科技（新兴解决方案/创新支付方案）铜奖的Clare.AI，旗下的人工智能聊天机械人（chatbot），可为金融机构处理客户服务查询。Clare.AI联合创办人之一的何思颖向本报表示，这款聊天机械人可透过Facebook Messenger及WeChat跟客户对话，它不但能理解广东话用语，更可以繁体中文回覆。何透露，Clare.AI正跟一间资产管理公司合作，协助客户解答理财产品问题，预计今年6月推出服务。 人机互动提供服务 何思颖认为，金融机构的客户服务团队人手紧绌，聊天机械人有助处理基本查询，能减轻员工的负担，也可提高效率。她强调，Clare.AI使用公开资料与客户对答，并未涉及个人私隐。 另一智能理财平台磐维科技…	2017-04-05	信报	财经新闻		658
从母亲学粤语 曾赴港最忆大佛	http://paper.wenweipo.com/2017/04/22/GJ1704220016.htm	多特塞尔在越南西贡(今胡志明市)出生，父亲是法国派驻当地的军人，母亲则是来自广州的华侨。1964年越战全面爆发，多特塞尔一家到法国逃避战火，当时她只有6岁，因此她表示对越南的记忆十分模糊，反而从母亲身上吸收更多中华文化，形容自己“同时吸收中法精华”。多特塞尔受访时，更即席用粤语对记者问好，但笑言粤语是从母亲学来，已经多年没说，“我只懂这么多”。 存粤曲画作 每天食中餐 多特塞尔表示，当年从印支半岛移居法国的人，大部分其实是南洋华侨，东南亚人反而不多。她亦对中华文化深感兴趣，办公室有一幅粤曲表演的画作，她指画作是由一名中国艺术家送赠，又透露母亲在她小时曾带她看过一次粤曲，对此印象深刻，“所以当我收到这画时十分高兴”。多特塞尔又称自己每天都会吃中餐，随着侨居巴黎的华人愈来愈多，当地中菜选择近年也增多，“过去是南方菜为主，现在则有北方菜”。 多特塞尔透露2000年曾到过香港，游览铜锣湾及九龙等…	2017-04-22	文汇报	国际专题		546
巴黎机场店铺皆备粤语员工	http://124.243.200.100/a.php?f=20170426/jj-38.txt	下月就是法国五月艺术节，作为赞助商之一的巴黎机场亦有派员到香港，宣传法国独有的生活文化。巴黎机场管理局副行政总裁Laure Baume表示，每年约有22万港旅客直飞到巴黎戴高乐机场，故当局亦很重视香港的旅客，故全机场店铺内都有能说粤语的员工。此外，机场亦设有一间机场博物馆，以让过境旅客在候机时亦不会闷。 Laure表示，由于巴黎戴高乐机场是欧洲其中一个转机中心。因此机场设有过境贵宾室Instant Paris，犹如一家精品酒店，为中途需作长时间停留的长途机旅客提供80间备有私人浴室的房间，房价方面，双人房间租用4小时收费为75欧元，另每一附加小时为10欧元。此外，为服务内地及香港旅客，机场的广播会设有普通话及粤语，而店铺内亦会有会说普通话及粤语的职员。	2017-04-26	大公报	香港经济		343
中大倡加授粤语 增“带路”民心交流	http://paper.wenweipo.com/2017/05/05/ED1705050005.htm	（记者 姜嘉轩）香港近年致力配合国家“一带一路”倡议，包括鼓励更多互访交流，促进“民心相通”，但要更有效建立友好关系，“语言互通”的作用不容忽视。 中文大学语文研究学者认为，香港语言环境多元，在充当互通桥梁角色方面具优势，而因应东南亚及海上丝路国家沿线亦不乏使用粤语的华人，建议香港可进一步巩固粤语地位，同时于学校中文课程里适当加入粤语拼音及语法等基础知识，让本港来自“一带一路”地区的少数族裔学生亦能受惠，长远有助培养更多能兼擅相关语言的人才。 流通大湾区 东南亚适用 近年香港有关“一带一路”焦点较多集中于经济关系的发展，中大中国文化研究所吴多泰中国语文研究中心主任邓思颖认为，人文交流其实也是值得重视的方向，语言为当中一大关键，“在香港有超过九成人说粤语，能说普通话的大约一半，至于会说福建话、潮州话、客语、上海话的人，加起来其实亦有一成。” 邓思颖指，上述语言其实已经涵盖了东南亚华人所说的…	2017-05-05	文汇报	新闻透视眼		952
学者倡中文科教粤语拓本港文化软实力平衡“三语”增加师资培训	http://stepaper.stheadline.com/news_content.asp?newsid=F03207.txt&newscat=F&newsdate=2017-05-05	“一带一路”除为香港带来经济发展机遇，亦促进人文交流，在一个“海上丝绸之路的声音”讲座上，中文大学学者指香港在全球华人社会地位举足轻重，尤与东南亚各地关系密切，港人应善用粤语优势和文化软实力开拓发展方向，又建议在基础教育的中文课程内加入粤语知识，平衡“三语”比重，并加强对非华语学生学习粤语及中文的支援。 中大上月举行三场“海上丝绸之路的声音”讲座，分享海上丝路国家的文化，以及华语人士学习华语的历程。中国语言及文学系副系主任邓思颖指出，位处海上丝路国家的东南亚国家华人众多，他们社区所说的主要语言是粤语、普通话和闽南语等，拥有相似语言环境的香港有优势，可对外担当海上丝路的桥梁角色，然而港人对粤语认识却严重不足。 邓思颖在中大中文系任教“粤语研究”，他坦言，选修这课的学生虽然大多以粤语为母语，但他们对粤语拼音等基础知识缺乏认识，“简单『八百』两个字读音，很多人都分不清，读『八八』、『百百』的都…	2017-05-05	星岛日报	教育	李咏潼	934
港澳研究会长徐泽粤语发言：白皮书可拨乱反正 图改变一国两制会“毫不妥协斗争” 11:37	http://news.mingpao.com/ins/instantnews/web_tc/article/20170429/s00001/1493436546663	香港基本法推介联席会议在港举行纪念《基本法》颁布27周年研讨会，主题为“恪守一国、慎行两制”，并邀请特首梁振英、中联办主任张晓明、全国港澳研究会长徐泽、中联办法律部长王振民等作嘉宾。 前港澳办副主任、接替陈佐洱新当选为全国港澳研究会长的徐泽更首次全篇用广东话发言。他表示，虽然有人认为一国两制白皮书、人大831框架出台，是中央收紧对港政策，有人更极端认为一国两制已变形，但他强调有关看法是“不正确、不必要”，称白皮书只是就一国两制落实中香港遇到的新情况、新问题进一步解释，以起“正本清源、拨乱反正之效”。 他强调，中央对一国两制仍有信心，对于那些对国家近代史、宪法体制不了解的人，亦会保持耐心，但指出若有人企图改变一国两制，则会“毫不妥协地斗争”。 特首梁振英致辞时表示，《基本法》在序言开首已指出“一国”事实，并体现在多项条文。他强调，香港的“高度自治”是中央授予，不是“自主性自治”、也非“完全…	2017-04-29	明报	即时港闻		496
学者倡中文科教粤语 拓本港文化软实力	http://www.stheadline.com/inews-content.php?cat=a&nid=85018	“一带一路”除为香港带来经济发展机遇，亦促进人文交流，在一个“海上丝绸之路的声音”讲座上，中文大学学者指香港在全球华人社会地位举足轻重，尤与东南亚各地关系密切，港人应善用粤语优势和文化软实力开拓发展方向，又建议在基础教育的中文课程内加入粤语知识，平衡“三语”比重，并加强对非华语学生学习粤语及中文的支援。 中大上月举行3场“海上丝绸之路的声音”讲座，分享海上丝路国家的文化，以及华语人士学习华语的历程。中国语言及文学系副系主任邓思颖指出，位处海上丝路国家的东南亚国家华人众多，他们社区所说的主要语言是粤语、普通话和闽南语等，拥有相似语言环境的香港有优势，可对外担当海上丝路的桥梁角色，然而港人对粤语认识却严重不足。 邓思颖在中大中文系任教“粤语研究”，他坦言，选修这课的学生虽然大多以粤语为母语，但他们对粤语拼音等基础知识缺乏认识，“简单『八百』两个字读音，很多人都分不清，读『八八』、『百百』的都…	2017-05-05	头条日报	即时港闻		889
问医生：肺痨不似粤语片 不会高烧咳出血	http://premium.mingpao.com/cfm/Content_News.cfm?Channel=ja&Path=67369473342/yaa3.cfm	【明报专讯】郑：郑志文医生 陈：陈伟文医生 观：Facebook Live 观众 观﹕持续咳嗽，会否导致肺炎？ 陈﹕持续咳嗽（或者慢性咳嗽）有好多原因，肺炎是其中一个可能性。持续咳嗽、气促等也可以是支气管炎的病征，支气管炎和肺炎有一定相似程度，但支气管炎患者可能没有胸痛，痰液不浓也没血丝。 另外，大家不要忽略肺痨。香港每年有5000宗肺结核新症。肺痨不会高烧，也不会好像粤语长片的主角般，咳出鲜血。肺痨征状包括疲累、消瘦、时常咳嗽、有痰等。如果持续咳嗽超过两个星期，尽快看医生做检查。另外，流感也可以引致继发性肺炎，需要小心留意。 郑﹕咳嗽是疾病的征状。如果没有肺炎病原，不会咳到变成肺炎。不过，如果本身患有长期病症、呼吸系统较弱（如：支气管扩张）或受到呼吸道感染，感染肺炎的风险较高。因此，留意病征有否转变。如有疑问，尽快求医。 打针仍感染 不如不打？ 观﹕早前，有一名3岁女童因为感染侵入性肺…	2017-05-01	明报	家庭医生睇医生		1355
粤语港片 丝路先锋	http://124.243.200.100/a.php?f=20170512/mf-11.txt	【大公报讯】记者谢敏娴报道：日前，香港中文大学（中大）中文系副系主任邓思颖、助理教授麦欣恩及博士研究生刘择明以“香港语言、文化：何去何从？”为题举行了一次媒体简介会，三位学者透过回顾不久前结束的“海上丝绸之路组曲”系列活动，从语言、教育及电影三个方面讲述香港在“一带一路”发展的优势及作用。 粤语流通“海丝” 以“海上丝绸之路组曲”为题的专题讲座、书展、国际论坛及工作坊等学术活动，由中大中国文化研究所吴多泰中国语文研究中心与中文系合办，已于三月二十七日至四月三十日在中大举行。该系列活动以“海上丝绸之路的声音”三场主题讲座拉开序幕，其中邓思颖与两位来自泰国的华语学习者文旺法师和柴美兰进行“非母语者的对谈”，麦欣恩主讲“南洋电影、教育与文化”，探讨新加坡、马来西亚的电影文化，以及香港和南洋地区电影的关系。 简介会上，邓思颖首先介绍香港语言、文化现状：“香港虽然目前以粤语为母语的人口有近六百二十…	2017-05-12	大公报	放眼花旗		1126
奇妙电视粤语频道明晚启播	http://hk.hkcd.com/content/2017-05/13/content_3648351.htm	【香港商报讯】记者余乐祖报道：奇妙电视(Fantastic TV)去年获政府批出有效期为12年的免费电视牌照，筹备经年后，粤语频道(77台)将于5月14日(星期日)晚上8时正式启播，缔香港电视史新一章，为观众提供全日24小时娱乐选择;英语综合频道(76台)预计于启播后12个月内投入服务，现有有线用户亦可透过解码器于标清7台及高清277台收看奇妙电视节目。 英语频道料12个月内开台 鉴于目前有线经营有变，香港有线电视企业有限公司执行董事兼总经理曾展章表示，面对未知的因素，决定奇妙电视开台当天不会大事举办活动，敬希观众体谅。但他在开台前夕，亲自操刀拍了两条短片，希望5月29日之股东大会通过注资方案，为同事争取选择权，保障2000个家庭收入的同时，也为观众提供多一个选择。 奇妙电视粤语频道除提供本地制作的精采剧集、综艺及娱乐资讯节目外，也会播放亚洲娱乐节目。	2017-05-13	香港商报	香港新闻		416
奇妙电视粤语频道昨开台	http://skypost.ulifestyle.com.hk/article/1810329/	【晴报专讯】新免费电视台“奇妙电视”昨晚正式开台，提供1条粤语频道“77台”；该台以节目巡礼作为开播首个节目，简介未来20个包括真人骚、饮食、旅游及生活资讯节目和剧集的启播时间等资讯。至于英语频道“76台”，则料在12个月内启播。 浸大新闻系助理教授杜耀明认为，奇妙电视投入资源远不及无线电视，不认为能打破“一台独大”局面，且面对播放外购剧集的网上平台竞争，以播放韩剧为主的奇妙电视仍须制作不同节目，以开拓新客源。	2017-05-15	晴报	港闻		220
免费教粤语 推广港文化	http://124.243.200.100/a.php?f=20170518/zm-52.txt	经过多年的打拚，粤语已经成为王海虎生活和生命的一部分，他同时意识到，这个影响人群上亿的语种，绝不仅仅是一个地方语言，已然成为一种国际语言。为了更好地推广香港文化，王海虎筹办了粤语文化推广大中华区（陕西站），面向青年学生和导游人员免费教授粤语，目前已经招募100多位相关人员。 王海虎说，对于香港游客来说，行程中遇到什么样的导游就如买六合彩。如果遇到的是粤语导游，那么整个行程就会非常轻松，沟通无碍；如果遇到普通话导游，则会听得很费劲。“尤其是陕西这样历史悠久的省份，周秦汉唐的历史本来已经非常遥远，如果再讲普通话，沟通不畅，香港游客的感受一定非常复杂。”王海虎说。 在推广粤语文化的过程中，王海虎一方面致力于讲好陕西故事，传播中国文化；另一方面，他又将香港人的前世今生、发展历程、优秀品质教授给学习者，希望通过文化互信，促进内地与香港的交流。 王海虎告诉记者，做粤语文化推广的另一个目的，也是希望能…	2017-05-18	大公报	中国特稿		510
粤语片女星于素秋病逝 享年89岁	http://www.singpao.com.hk/index.php?fi=instantnews&id=5628	曾演出经典粤语片《如来神掌》的武打女星于素秋走红于上世纪五六十年代，近年来与家人定居美国，周二(16日)传出死讯。 据报道，于素秋是在上周五(12日)不敌肺炎病魔，安详离世，享年89岁，子女家人都陪伴在侧。 于素秋本名于凤，是上海人，从小在父亲于占元指导下学习武术，8岁时首次登台，成为京剧界中著名刀马旦，是“七小福”的大师姐。她18岁开始接拍电影，作品达200多部，最为人熟知的是和曹达华合作的《如来神掌》，两人还因此传出假戏真做，是戏迷心中永远的银坛情侣。 1966年于素秋嫁给粤剧名伶麦炳荣，婚后淡出娱乐圈，两人移居美国过着低调生活，并育有两子一女。于素秋最后一次现身公开活动，是出席2009年七小福50周年庆祝大会，可见她与一众师弟之间情谊。	2017-05-16	成报	即时新闻		360
【骑呢游学团】"Jaw drops" as something shocks, surprises or amazes you 粤语“O嘴” 英文“掉下巴”	http://paper.wenweipo.com/2017/05/31/ED1705310023.htm	大家还记得早些年香港中学会考中国语文试卷五阅读材料中的一幅海报标语，成为当时佳话，令全城闹得热烘烘吗？相信大家对那句标语“见鬼勿O嘴，潜水怕屈机”都不会太陌生。 而就是当中的潮语如“O嘴”、“潜水”和“屈机”令到当年部分考生（特别是那些对潮语非常陌生的考生）相当不满，批评考评局出卷出得差。 可指惊讶惊喜惊吓 出得好不好实在很难说，但是可以肯定的一点是，这些潮语被考评局成功“活化”。原来对这些潮语一窍不通的人都因此而知道时下年轻人用的这些字眼。 “O嘴”的意思简而精，例如，当有人讲完个“烂gag”，大家的反应通常都是“O晒嘴”，即是惊讶得嘴巴合不拢，像读英文字母O字的形状。外国人听完别人讲“烂gag”，他们的反应通常是sarcarstic地（嘲讽地）冷笑两声，又或者不屑地说：So funny。 所以，究竟英文有没有“O嘴”这个“形象化”的expression（表达）呢？ 完全一样的说法是没…	2017-05-31	文汇报	文江学海		1104
小三来港 良师教粤语资助补英文 家贫早丧父 曾老师助人报师恩	http://premium.mingpao.com/cfm/Content_News.cfm?Channel=gb&Path=101054736063/gca1h.cfm	【明报专讯】中学教师曾燕红上月兑现对学生的承诺，登上世界之巅，山上是个女汉子，山下却是个善解人意的老师，在其他老师眼中难教的学生，送到她手上也会变得判若两人。“做老师一定要尊重学生，你为他们好，学生感受到的。”曾燕红说，她不求学生他日飞黄腾达，只求学生做个好人，延续鼓励他人的精神，就如她延续当年帮过她的老师的精神一样。 不求学生飞黄腾达 只求乐于助人 从尼泊尔归来的曾燕红，休息过后接受《明报》访问，谈及自己投身教育的因由。曾燕红小三下学期从内地移居香港，因父亲早逝，她靠妈妈一手养大，即使母亲非常关心儿女，有时也因工作问题无暇理会，学校的老师便担起重要角色。来港初期，曾燕红一句广东话也不会说，她的老师抽时间一对一教她发音；有次她上学途中弄伤头，满脸是血，回到学校给老师看到，老师便为她叫救护车，令当初懵懂的小女孩把老师看成天使。 升中不懂ABC 发愤苦读考第一 小学时因专注学广东话，令曾燕红…	2017-06-06	明报	港闻		1534
中大研发检测系统 纠错别字修正粤语	http://hk.hkcd.com/content/2017-06/12/content_3655430.htm	【香港商报讯】记者叶佩瑜报道：随着各种潮语及表情符号的出现，不少学生习惯使用网络语言，大大影响中文写作能力。有大学成功研究出“错字和粤语检测系统”（下称ACT），只需几秒即可完成分析一篇几百字的文章，找出错字及粤语，提供修正建议，准确率高达八成。研究团队希望将ACT推广至教育界，特别在考试方面提升学生的语言能力。 检测千字文章只需数秒 中文大学系统工程与工程管理学系教授黄锦辉表示，其研究团队从2014年起获创科院邀请研发ACT系统，以针对学生惯用网络语言，导致中文写作能力下降的问题，ACT内有20GB的中文文章资料及6万多个中文字的混淆集，经过教师的修改、机械学习及数据分析等提升，目前ACT准确率高达八成，只要几秒时间即可完成分析一篇几百到一千字的文章，标示出大部分错别字，并提供错别字与粤语口语的修正建议。 提供粤语字句修正供选择 ACT主要分为错字检测与粤语检测两部分，可检测常见错字、…	2017-06-12	香港商报	香港新闻	叶佩瑜	912
中大创检测系统“捉”粤语错字	http://124.243.200.100/a.php?f=20170612/gw-73.txt	【大公报讯】记者杨州报道：年轻一代打字多过写字，打错字又无提示。目前中文字检测工具只能简单做到找出错别字，中文大学研发全港首个能判断粤语字的错字检测工具，准确率超过80%，年内便推出，除基本辨识错别字和简体字功能外，更加入粤语用法和倒装用法进行检测，例如“钟意”更正为“喜欢”、“隐私”更正为“私隐”。 中大工程学院与应科院合作，2015年起展开研发“错字和粤语检测系统”，以解决没有一套完善的中文检字工具，该系统已在语文教师及中小学生间进行测试，料年内正式推出市面。中大系统工程及工程管理系研究员冯沛璋表示，系统基于大数据及深度学习，与传统的检字工具不一样，会随着系统学习而更新数据库，过程无需人工。 该系统分两部分，即“错字检测组”和“粤语检测组”，检测句子中不能与前文后理组成通顺句子的字，类似语境意识，其数据库存有一万二千个字典词语及六万个中文混淆字集。同时，研究人员亦把应科院提供的逾千份…	2017-06-12	大公报	香港特稿		846
略说粤语书写	http://stepaper.stheadline.com/news_content.asp?newsid=E05170.txt&newscat=E&newsdate=2017-06-13	近几年，坊间对“粤语本字”、“粤语正字”的兴趣甚浓，电视台为此话制作节目，出版界也出版了不少相关的著述，然后网络上更不时有讨论，有发掘有考证有整理，当然也有攻伐人家胡乱发掘胡乱考证者。煞是热闹，却同时也很无奈。无奈之处在于，粤语的语音跟书写之间的发展脉络，似断还续，我们今日可能看到一些连结，但要追寻起来，真要有一番音韵训诂的根柢才敢说做得滴水不漏，清清楚楚。 文：岑伟宗部分图片：岑伟宗、星岛图片库、剧场空间 我开始在自己的歌词本上用“粤语本字”，始于二○○六年。全因当时仍在剧场空间工作的张可坚，他翻译并导演粤语版的《Sunday in the Park with George》（粤译《点点隔世情》）。当时由我粤译歌词，他问我广东话的字词是否大都可以写得出来，如果有的话，就可以用到剧本和歌词里。就他这一问，开启了我对“粤语本字”的使用之门。往后几年，遇上演出场刊可以刊印歌词，我就大都会用上…	2017-06-13	星岛日报	副刊		2321
20天掌握地道粤语	http://stepaper.stheadline.com/news_content.asp?newsid=F03192.txt&newscat=F&newsdate=2017-06-13	粤语是广东方言，蕴含广东及香港文化，但港人对这种母语未必有清楚认识，如拼音、地道口语的解释及写法等。作者郑定欧是前香港城市大学中文、翻译及语言学系副教授，以二十课教授最有“港味”的香港话，每课包含课文、生词、会话和鬼马语汇，并设有“粤语语音系统”、“粤语常用字表”、“粤语传意项目”等，让读者在二十天内掌握香港话。 书中的题材十分“贴地”，涵盖衣食住行、科教文卫、影视歌艺等，如从农历新年，认识“利是 来”、“行大运”等口语意思，反映本港文化及社会生活。每篇课文附有普通话对译，对照两语文法及用字的差异。 多说多听多看是学习语言的不二门法，本书附有MP3光碟，由本地录音员朗读示范，帮助读者提升粤语能力。 书名：《地道粤语（香港话）：20天流利说》 作者：郑定欧 出版社：三联书店 出版日期：2017年4月 定价：$78 本栏园地公开，欢迎出版社提供新书推介，可电邮：kate.chau@singt…	2017-06-13	星岛日报	教育	郑定欧	525
中大研发检测系统 纠错别字修正粤语	http://www.hkcd.com/content/2017-06/12/content_1052108.html	【香港商报网讯】记者叶佩瑜报道：随著各种潮语及表情符号的出现，不少学生习惯使用网络语言，大大影响中文写作能力。有大学成功研究出“错字和粤语检测系统”（下称ACT），只需几秒即可完成分析一篇几百字的文章，找出错字及粤语，提供修正建议，准确率高达八成。研究团队希望将ACT推广至教育界，特别在考试方面提升学生的语言能力。 检测千字文章只需数秒 中文大学系统工程与工程管理学系教授黄锦辉表示，其研究团队从2014年起获创科院邀请研发ACT系统，以针对学生惯用网络语言，导致中文写作能力下降的问题，ACT内有20GB的中文文章资料及6万多个中文字的混淆集，经过教师的修改、机械学习及数据分析等提升，目前ACT准确率高达八成，只要几秒时间即可完成分析一篇几百到一千字的文章，标示出大部分错别字，并提供错别字与粤语口语的修正建议。 提供粤语字句修正供选择 ACT主要分为错字检测与粤语检测两部分，可检测常见错字…	2017-06-12	香港商报	即时新闻		913
【卓眼睇港】我与香港回归20年之三——我学粤语，从黐线开始！	http://www.hkcd.com/content/2017-06/12/content_1052270.html	学一门“外语”(母语外的语言)，很多人从骂人的话开始。其实，我也一样。我学是从“黐线”(qixin，神经病)开始的。 我的职业起步于厦门的一家叫做XOCECO的公司，第一个O是Overseas。我去的时候厦门特区刚刚成立一两年，香港投资方康力在这家公司派驻了许多不太会讲普通话的经理。好玩的是他们的英文名，总经理冯光锐叫JOHN，采购经理叫Jonny，海外市场部经理叫Joseph，后来来的叫Johnsen……连模具厂的李大叔也叫J什么来着。大概是冯信教，所以请的人也都是这类货色的。 当时我在海外市场部，备受“欺辱”。这些叫J的经理，常常拿广东话嘲笑我。一个人听不懂羞辱的话，本来是一种福气。但血气方刚的我，感觉那是一种难耐，这种难耐化作了羞辱感。于是，我发誓要尽快听懂广东话。 那时候，广交会每年两届，每届会期有两个礼拜之久，连布展撤展要一个月长。1987年春交会，我发誓在广州把广东话学出“臭…	2017-06-12	香港商报	即时新闻		4977
蛋挞取代鸡蛋馅酥饼儿 强势粤语反攻内地	http://premium.mingpao.com/cfm/Content_News.cfm?Channel=gb&Path=235794594567/ghk2.cfm	【明报专讯】“小姐，水饺一碗多少钱”还是“小姐，睡觉一晚多少钱”，不小心发错声调，表达的意思可是天壤之别。 过去20年，中港两地接触频繁，两地用字互为影响，当中不少字句广东话用词，被收录于语言界具权威地位的《现代汉语词典》。 许耀赐说回归以来，港人接触或使用普通话的机会增加，但仍有不少常犯错误，闹出很多笑翻肚皮的笑话。如称赞男生英俊“帅哥”，港人常读错为“衰哥”，褒词变贬词，好人变坏人；英勇的“舰队”更变成美味的“煎堆”。 回归后在多个政策带动下，两地市民接触增加，生活文化及用字亦互为影响，当中不少广东话字词，现成为内地日常词语，亦收入《现代汉语词典》，成了新词酷语。如小食“蛋挞”，以前普通话据其食材而命名，叫“鸡蛋馅酥饼儿”，现简化至与本港一样叫蛋挞，或“蛋塔”；茶楼点心“凤爪”内地以前叫“鸡爪子”，后来觉得香港名称较优雅，亦方便市民，故跟随港人改叫“凤爪”。 “靓仔、靓女”不再属香港…	2017-06-24	明报	港闻		628
【特稿】新华社粤语神曲 Rap教“一国两制”	http://paper.wenweipo.com/2017/06/28/HK1706280020.htm	“一国两制”如何最入脑？透过说唱和动画或有不俗效果。新华社昨日上午在“新华香港”facebook发布新一首“神曲”，以粤语说唱，Rap出“一国两制”的意思和对香港的影响。 新华社的新曲配以精美动画，用说唱方式带出香港的过去、现在和未来。该歌曲叙述了“一国两制”的精神，指出在国家给香港的“大礼包”中，向香港授予行政管理权、立法权、独立司法权和终审权，而涉及外交和军事方面可以“呼叫中央政府”。 歌曲更生动地带出香港不同的特色，如太平山、鸡蛋仔、跑马、港币、两文三语等，反映出香港在“一国两制”下的多彩发展、原本生活方式得以维持。此外，该曲还带出港珠澳大桥、“一带一路”等各项发展。 其实，在这首歌曲发布前一晚，新华社也发布了该曲的普通话版，面对全国民众与香港同贺回归20年。虽然该曲以普通话演唱，但中间仍然保留广东话的部分，唱到“最爱紫荆加衬红色的底”，绘声绘影地描述香港的区旗。 发布不足24小时…	2017-06-28	文汇报	港闻		501
新华社“神曲”粤语Rap出“一国两制”内涵	http://124.243.200.100/a.php?f=20170628/gw-63.txt	仲有三日就系香港回归祖国20周年纪念日。郑晴发现，新华社推出咗一首粤语“神曲”，首次透过广东话Rap（说唱）嘅形式，同市民介绍“一国两制”嘅种种内涵。当中提到，国旗同区旗喺1997年7月1日嘅香港回归大典上升起，形容系“降落咗屈辱，升起咗主权”。 短片一开始，一位女教师就同佢嘅学生讲，话要迎接一个“好大好大嘅考试”，系关于香港同“一国两制”，学生就口窒窒咁话“触碰到我知识嘅盲区”。之后，老师就Rap住向同学介绍香港，例如即使香港经历过金融危机，但依然表现良好；又落实咗深港通同沪港通等。老师亦有介绍香港嘅美食，例如有“香到爆”嘅鸡蛋仔。 片中亦出现一位男声，介绍由国家授权畀香港嘅“大礼包”，包括行政管理权、立法权，以及独立嘅司法同终审权，但系外交同军事方面就无“管理员权限”，“有事请呼叫中央政府啦”。 大家如果想听听呢首神曲，就请click入去下边呢条link睇下啦：http://news…	2017-06-28	大公报	香港特稿		477
彭丽媛访安老中心讲粤语	http://www1.hkej.com/dailynews/article/id/1598772/	习近平周五检阅驻港部队及与青年交流期间， 习近平夫人彭丽媛在特首夫人梁唐青仪、中联办副主任殷晓静、劳工及福利局局长萧伟强等人陪同下，前往黄竹坑一间安老中心探访长者，并参观安老中心设施。彭丽媛期间与多名长者共同制作立体卡；有中心长者则送上手绘金鱼画作，以表感谢其到访。 送赠电视机及智能健康机 彭丽媛在安老中心逗留约半小时，期间听取职员讲解为长者治疗训练的复康仪器、了解院友日常生活，又与接受职业治疗训练的长者击拳，为对方打气。探访期间，彭丽媛不时以半咸淡的广东话说“你好”向长者问好，院友则以普通话赞她“很漂亮”，彭丽媛又以广东话“唔该”、“多谢”答谢。彭丽媛离开前，并向中心送赠一部智能健康一体机和一部电视机。 彭丽媛又向在场守候的记者微笑挥手，但未有回应提问。另外，彭丽媛到访前，约30名头戴红帽和手持国旗、区旗的长者乘旅游巴抵达南区，欲欢迎彭丽媛，但因未有获邀，警方为保安考虑决定请他们离场。…	2017-07-01	信报	政坛脉搏		562
“游子”变“柚子” 《我的Hong Kong》粤语版被指唔啱音	http://premium.mingpao.com/cfm/Content_News.cfm?Channel=gb&Path=101055227043/gzd1.cfm	【明报专讯】新华社官方facebook日前为庆祝香港回归20周年，推出普通话歌曲《我的Hong Kong》，歌曲由参加过《快乐女声》嘅路滨琪主唱，唔少人赞好听，原来呢首歌仲有广东话版，请嚟香港老牌歌手张明敏同个仔主唱，今次同样备受网民关注，但唔少人关心嘅，系歌词唔啱音嘅问题。 《我的Hong Kong》广东话版与普通话版一词两唱，唔少网民发现当普通话歌词套入广东话之中，有时就会“唔啱音”，好似“游子结束 百年的流浪”、“二十年回望，再没有仿徨”、“一国两制、港人治港、高度自治，最坚定力量”等，部分歌词同曲调唔夹，有啲突兀，包括“游子”变咗“柚子”、“仿徨”变咗“蚌王”呀咁。 有人仲专心听歌务求点出重点古怪位，话如果唔睇歌词，听到“专奄富强”（尊严富强）、“二十年烩芒”（二十年回望），确系会忍唔住笑。不过，亦有人留言赞话听广东话始终亲切啲，有人就话“词很有意思，歌难唱得动听”，认为唔系歌手…	2017-07-04	明报	港闻		427
粤语公益单曲《爱可盛开》首发	http://www.hkcd.com/content/2017-07/04/content_1055519.html	香港回归祖国20周年前夕，6月28日，粤语公益单曲《爱可盛开》在中央人民广播电台香港之声《经典最流行》节目独家首发。这首歌以消除贫困，扶贫攻坚为主题和时代背景，由著名音乐人黄立杰担纲音乐总监，音乐制作人刘深领衔美国音乐团队历时两年打造，香港青年歌手、2014年地球小姐中国赛区冠军沈殷怡演唱。 “无穷峻岭与海，也可给漆黑掩盖，却不阻星光去将爱盛开……”《爱可盛开》向世界展示中国人民对于2020年消除贫困的坚强决心和伟大力量，以及作为负责任的大国，响应联合国提出的伟大目标：人类在2030年消除绝对贫困。 粤语版公益单曲《爱可盛开》，是英文版《Light of Love》、中文国语版《大爱光芒》的姊妹版，不同的歌词表达了共同的主题和大爱之心、公益之心，也是向历史上众多著名公益歌曲的致敬作品。 由流行天王迈克尔·杰克逊和莱昂纳尔·里奇作曲，迈克尔·杰克逊填词，传奇制作人昆西·琼斯制作，由当红的美…	2017-07-04	香港商报	即时新闻		510
粤语公益单曲《爱可盛开》首发	http://hk.hkcd.com/content/2017-07/02/content_3660915.htm	香港回归祖国20周年前夕，6月28日，粤语公益单曲《爱可盛开》在中央人民广播电台香港之声《经典最流行》节目独家首发。这首歌以消除贫困，扶贫攻坚为主题和时代背景，由著名音乐人黄立杰担纲音乐总监，音乐制作人刘深领衔美国音乐团队历时两年打造，香港青年歌手、2014年地球小姐中国赛区冠军沈殷怡演唱。 “无穷峻岭与海，也可给漆黑掩盖，却不阻星光去将爱盛开……”《爱可盛开》向世界展示中国人民对于2020年消除贫困的坚强决心和伟大力量，以及作为负责任的大国，响应联合国提出的伟大目标：人类在2030年消除绝对贫困。 粤语版公益单曲《爱可盛开》，是英文版《Light of Love》、中文国语版《大爱光芒》的姊妹版，不同的歌词表达了共同的主题和大爱之心、公益之心，也是向历史上众多著名公益歌曲的致敬作品。 由流行天王迈克尔——杰克逊和莱昂纳尔——里奇作曲，迈克尔——杰克逊填词，传奇制作人昆西——琼斯制作，由…	2017-07-02	香港商报	生活与人文		514
粤语佳 有助学英语	http://skypost.ulifestyle.com.hk/article/1885848/	【晴报专讯】香港不少父母与小朋友沟通时，因怕影响子女英语发展，而拒绝与子女说粤语。香港大学言语及听觉科学哲学博士研究生蔡浚文（William）的研究就发现，学习粤语非但不窒碍英语发展，反有助英语音段语音感知。 William的硕士研究是关于一名7岁、双语的香港儿童，在脑里如何分析声调及英语的重音。研究除发现英语的轻重音与粤语音调有相似地方，儿童对粤语的9声声调的敏感度，有助他们聆听英语轻重音。其研究也发现儿童听中文声调的表现，能预测小朋友英文阅读能力，也可助英语认字，对阅读有帮助。William将于9月往美国麻省理工学院进行研究10个月。 加强认字能力 另一香港大学医学博士研究生、24岁的姚诗韵（Rachel）就难忘第一次在手术室外，取得移植器官后女婴的肝脏作研究，几克的重量令她感到使命之重，驱使她认真研究。 Rachel选择了儿科外科作为博士研究科目，专门研究胆管闭锁症，她将会于9月前…	2017-08-21	晴报	港闻		470
学英语弃粤语 港大研究生︰港童或失优势	https://www.am730.com.hk/news/%E6%96%B0%E8%81%9E/%e5%ad%b8%e8%8b%b1%e8%aa%9e%e6%a3%84%e7%b2%b5%e8%aa%9e-%e6%b8%af%e5%a4%a7%e7%a0%94%e7%a9%b6%e7%94%9f%ef%b8%b0%e6%b8%af%e7%ab%a5%e6%88%96%e5%a4%b1%e5%84%aa%e5%8b%a2-92083	不少家长为怕子女输在起跑线，在家中都只以英语与子女沟通，增强他们英语能力；有港大博士研究生初步研究发现，粤语声调与英语轻重音有相似地方，更发现儿童如有粤语经验，有助其学习英语轻重音。 修读言语及听觉科学的博士研究生蔡浚文(右一)认为，如学习英语需放弃粤语，除会令儿童失去优势外，亦会影响其身份认同，他冀研究带出学习粤语非不窒碍，反而有助英语发展的信息，并希望研究成果可应用于双语教育发展，如将来可透过儿童聆听粤语能力，预测其英文阅读能力。 语言不单直接影响个人发展，亦与生活息息相关，语言学博士研究生姚雪仪(右二)研究多声调语言的韵律，如粤语、潮州话等，他提到，现时生活经常用到人工智能，惟发现大多的人工智能在说粤语时，皆有不自然的情况。她希望了解语言中的韵律，以助语言学习和人工智能方面的应用。 除了语言研究外，也需要在科学领域向前；医学博士研究生姚诗韵(左二)指，胆管闭锁症为目前全世界儿童需接…	2017-08-21	am730	新闻		595
粤语歌情怀	http://124.243.200.100/a.php?f=20170823/tk-5.txt	提到粤语歌，不知道有多少人像我一样是有情怀的，就连不少本身不会说粤语的歌迷也对广东歌曲情有独钟。原因大概有很多吧，各有各的不同，而我，作为地地道道的广东人，可以说是听着粤语歌长大的。即便已经记不清最早是从什么时候开始听粤语歌的，但除了“月光光，照地堂，虾仔你乖乖瞓落床。”这首儿时的粤语晚安歌之外，有记忆以来听到的第一首流行曲肯定也是广东歌。 记得小时候家里存了不少磁带，磁带里面的一首首粤语歌大概都是我这一辈人的回忆吧。后来搬家的时候，磁带丢失了不少，现在仅存的几张已然是稀有物品了。那时与朋友讲起张国荣，梅艳芳，Beyond，四大天王等等，永远都如数家珍般，总是不停歇地侃侃而谈。 上中学的时候就喜欢上了张学友的歌，不知道是不是发音咬字的关系，总觉得他的粤语歌比国语歌唱得好，《情书》、《祝福》、《情系半生》，每一首歌的背后都藏着故事，感人至深。之后，就迎来了千禧年，古巨基、陈奕迅、杨千嬅、T…	2017-08-23	大公报	大公园	陈楚	1183
港大研究生获资助 赴美研究粤语助学英文 (00:01)	http://m.on.cc/nc/hknews/20170821/20170821000155lc.html	【on.cc东网专讯】学粤语有助学英语?六名港大博士研究生将远赴美国学术交流，当中有研究生眼见不少港人父母只用英语与子女沟通，摒弃粤语，希望透过研究证明学粤语亦有助学英语，为英语学习者及教育者提供裨益；有研究生冀找出胆管闭锁症成因，以研究药物，救救病童。他们获二零一七/一八年度研资局-富布莱特(香港)青年学人计划的资助赴美研究半年至一年，每月获一万二千四百八十元资助。 廿五岁的言语及听觉科学哲学博士研究生蔡浚文，希望藉研究幼儿兼学粤语及英语的过程，阐述学粤语有助学英语。他说，粤语声调与英语轻重音类似，将往美国麻省理工学院做研究，证明学粤语有助认英文字从而增强阅读能力。 他任言语治疗师时，发现不少父母觉得英语能力对未来发展较重要，“迷信”学粤语影响英语发展，故只用英语与子女沟通。他自小于国际学校读书的表哥和表弟正因此而不懂说粤语，令他大叹可惜，觉得说粤语是身份认同，兼备双语能力更有优势。 …	2017-08-21	东方日报	即时港闻		669
港大博士生︰学粤语反助学好英语 08:00	https://topick.hket.com/article/1885902/	有父母为了子女“赢在起跑线”，即使母语是粤语，与子女沟通时也拒绝讲，以为有助学好英语。 但香港大学言语及听觉科学哲学博士研究生蔡浚文（William）的研究正正破解家长的迷思，学习粤语非但没有窒碍英语发展，反而有助英语音段语音感知。 William有两位香港出生的表兄弟，他们父母在外国读书，认为英文比粤语重要，学中文会影响英文发展，故不用中文与他们交流，两人亦一直就读国际学校，表兄弟两人基本上不懂讲粤语，“我觉得好可惜，粤语除了实际的功用之外，也是对自己身份的认同。” 身为言语治疗师的William，亦曾遇很多家长问相关的问题，故对此研究萌生兴趣。他指作为土生土长及接受教育的香港人，自己小学时期也曾混淆“present”（礼物）及“present”（汇报）、“insight”（见解）和“incite”（煽动）等读音，“作为一个过来人，明白分轻重音对学习英文很重要。” 他修读硕士时研究一个…	2017-08-21	经济日报	即时社会		732
粤语流行歌舞剧载誉重演	http://orientaldaily.on.cc/cnt/lifestyle/20170830/00321_004.html	张国荣的《Stand Up》、陈慧娴的《跳舞街》、张立基的《Electric Girl》等歌曲，首首都是香港人的集体回忆。将于10月重演的粤语流行歌舞剧《Electric Girl》，不但选用了多首80至90年代的经典粤语金曲，故事内容亦发人深省，讲述男主角姜志聪在婚礼上重遇昔日好友白耀晨，勾起学生时期的回忆、对女神阿Yen的倾慕、对舞蹈的热诚等，继而与好友重组跳舞组合，为梦想、为青春，踏上属于自己的舞台。该剧以轻松和富娱乐性的手法带出一个“生命影响生命”的讯息，观众可感受到每位舞者、演员和舞台工作者对表演艺术的热诚和对本土流行文化的热爱。 Info. 演出日期：10月13日至15日 演出地点：荃湾大会堂演奏厅 票价：$200、$160（全日制学生、60岁或以上高龄人士、残疾人士及看护人、综合社会保障援助受惠人可享半价优惠） 撰文：郑国河 查询：3103 1889 网址：www.hkda…	2017-08-30	东方日报	时尚潮流		485
英语班标榜外籍导师 澳洲华人任教讲粤语	http://premium.mingpao.com/cfm/Content_News.cfm?Channel=gb&Path=202112568306/gfa1.cfm	【明报专讯】消费者委员会接获不少涉及培训课程或兴趣班的投诉，有投诉人报读英语课程，标榜“外籍导师”教授，但上课时发现导师是华人，上课八成时间用广东话。不过，课程机构向投诉人解释，任教的导师持澳洲国籍，所以是“外籍人士”。 消委：与消费者期望有分歧 宜附资历 新一期《选择》月刊刊载市民报读课程的投诉个案，其中朱小姐接获Z公司推销一个100小时英语课程，并指职员推介课程由外籍导师操练会话，并设单对单会话指导，而课程可申请持续进修基金资助。朱付款3045元完成第一单元课程，其后再付3045元参加第二单元的聆听与会话，但完成后认为课程与介绍有出入，包括导师是华人，该导师虽英语口音纯正，但课堂八成时间以广东话授课。朱指面对两难，因为她需要完成4个单元才可以申领持续进修基金。朱向Z公司投诉，但Z指导师持澳洲国籍，所以是外籍人士。 Z公司则向消委会解释，任教导师持有认可资历，又指当日向朱小姐推介的职员…	2017-09-15	明报	教育		907
消委会：“澳籍华人也算外籍” 英文课80%讲粤语事主嬲爆	http://www.stheadline.com/inews-content.php?cat=a&nid=197490	要力争上游，保持竞争力，不少人士都会用私人时间进修。不过坊间的学校却可能存在陷阱，一位朱小姐报读1万元英文课程，当时介绍指由外籍老师一对一会话指导，怎外籍老师课程，原来是“持澳洲籍华人”，所以也是“外籍人士”，而且表示没有其他导师可以接替，该学校又强调老师有认可资格。 消委会接获投诉人朱小姐的个案，她当时相信职员所介绍，于是给予300元留位费，然后又交了3045元第一期学费，但及后发现课程有出入，例如原本指有一对一会话指导，但也没有外籍老师，职员说华人教师持澳洲籍所以也是“外籍人士”，而且有认可资格，朱小姐虽然该老师英语口语纯正，但课程有八成时间讲广东话，不是她所想，而且她要上足四期课程才可领到持续进修基金资助，令她进退失据，她要求该公司必定要提供“外国人导师”及一对一会话课，否则不会继续余下课程。 该公司事后回覆指，一对一会话课在第二期首课进行，但朱小姐缺课，而当日安排朱小姐上课的职员…	2017-09-14	头条日报	即时港闻		449
消委会：“澳籍华人也算外籍”英文课80%讲粤语事主嬲爆 13:22	http://std.stheadline.com/instant/articles/detail/512883-%E9%A6%99%E6%B8%AF-%E6%B6%88%E5%A7%94%E6%9C%83%EF%BC%9A%E3%80%8C%E6%BE%B3%E7%B1%8D%E8%8F%AF%E4%BA%BA%E4%B9%9F%E7%AE%97%E5%A4%96%E7%B1%8D%E3%80%8D++%E8%8B%B1%E6%96%87%E8%AA%B280%25%E8%AC%9B%E7%B2%B5	要力争上游，保持竞争力，不少人士都会用私人时间进修。不过坊间的学校却可能存在陷阱，一位朱小姐报读1万元英文课程，当时介绍指由外籍老师一对一会话指导，怎外籍老师课程，原来是“持澳洲籍华人”，所以也是“外籍人士”，而且表示没有其他导师可以接替，该学校又强调老师有认可资格。 消委会接获投诉人朱小姐的个案，她当时相信职员所介绍，于是给予300元留位费，然后又交了3045元第一期学费，但及后发现课程有出入，例如原本指有一对一会话指导，但也没有外籍老师，职员说华人教师持澳洲籍所以也是“外籍人士”，而且有认可资格，朱小姐虽然该老师英语口语纯正，但课程有八成时间讲广东话，不是她所想，而且她要上足四期课程才可领到持续进修基金资助，令她进退失据，她要求该公司必定要提供“外国人导师”及一对一会话课，否则不会继续余下课程。 该公司事后回覆指，一对一会话课在第二期首课进行，但朱小姐缺课，而当日安排朱小姐上课的职员…	2017-09-14	星岛日报	即时香港		449
绝代风华－－五六十年代粤语片演员剪影	http://hk.hkcd.com/content/2017-08/06/content_3669033.htm	上世纪五六十年代是香港影坛一段光辉灿烂的时期，诞生了众多各具魅力的明星和演员。《绝代风华》一书作者搜集电影藏品近30年，收藏逾千帧剧照及大量明星照像、杂志、电影特刊，部分为未曾面世的珍贵图片；辅以演员生平事迹介绍，以及对演员与影圈的印象和怀想，图文并茂，向读者展现昔日香港影坛的面貌。 《绝代风华》介绍40位粤语片女演员，包括白燕、芳艳芬、于素秋、邓碧云、嘉玲、南红、陈宝珠、萧芳芳、沈殿霞、罗兰等；她们或青涩或成熟、或淡雅或浓艳，都是影坛亮丽美好的风景。书中辑录逾210张图片，与下篇《英雄本色》一同阅读，会对粤语片的黄金时代有更全面的了解。 作者吴贵龙，香港收藏家，主要藏品包括邮品、车票、旧照等。研究文章曾见《邮光》杂志及中国邮学会网站。编著有《邮历香江》（2016年）、《游历港岛：香港电车轨迹》（2016年）及《星光大道－－五六十年代香港影坛风貌》（2016年）。 连民安，业余香港电影及…	2017-08-06	香港商报	生活与人文		544
港大博士生：学粤语反助学好英语	http://paper.hket.com/article/1885872	【本报讯】有父母为了子女“赢在起跑线”，即使母语是粤语，与子女沟通时也拒绝讲，以为有助学好英语。 但香港大学言语及听觉科学哲学博士研究生蔡浚文（William）的研究正正破解家长的迷思，学习粤语非但没有窒碍英语发展，反而有助英语音段语音感知。 William有两位香港出生的表兄弟，他们父母在外国读书，认为英文比粤语重要，学中文会影响英文发展，故不用中文与他们交流，两人亦一直就读国际学校，表兄弟两人基本上不懂讲粤语，“粤语除了实际的功用之外，也是对自己身份的认同。” 身为言语治疗师的William，亦曾遇很多家长问相关的问题，故对此研究萌生兴趣。他指作为土生土长及接受教育的香港人，“明白分轻重音对学习英文很重要。” 他希望研究未来可应用在真实的教育情况，为英语学习者、教育和临床工作者提供裨益，也为纠正“摒弃粤语学英语”的现象。蔡浚文将于下月前往美国麻省理工学院进行为期10个月的研究。	2017-08-21	经济日报	港闻		442
明艺．文讯：粤语吟诵齐悠享	http://premium.mingpao.com/cfm/Content_News.cfm?Channel=ja&Path=67370866122/vsa2.cfm	【明报专讯】大学古典诗社“璞社”主办，诗艺座谈会第八会：“粤语吟诵齐悠享”，将于九月二十四日下午二时假香港浸会大学温仁才楼六楼OEM 602室举行。讲者为香港资深传媒人严力耕先生。专家将分享粤语吟诵的技巧与心得。同场尚有多位诗人出席，欢迎即席交流，相信裨益匪浅。报名及查询请电邮：hkbupoem@yahoo.com.hk。	2017-09-18	明报	文化力场		164
明珠台明年设手语传译粤语新闻	http://www.singpao.com.hk/index.php?fi=news1&id=47901	【本报港闻部报道】无线电视明珠台由明年7月3日开始，提供手语传译粤语新闻节目。通讯事务管理局表示，无线须于每日下午6时至午夜12时之间，在明珠台播放一个不少于15分钟设有手语传译及繁体中文字幕的详尽粤语新闻节目。无线电视发言人称，安排是经商讨的结果，播放详情于落实后公布。 新规定 予9个月准备 为配合听障人士更易取得资讯的需求，通讯局公布，根据无线的本地免费电视节目服务牌照的相关条件，指示无线由2018年7月3日起，在明珠台每日播放提供手语传译的粤语新闻节目。 通讯局经考虑免费电视持牌机构，包括无线的陈述及专责小组的建议后，昨日向无线发出指令，要求无线实行手语规定，包括无线须于每日下午6时至午夜12时之间，在明珠台播放一个不少于15分钟设有手语传译及繁体中文字幕的详尽粤语新闻节目；如手语新闻节目当中某些环节已有文字显示，或在某些情况下因技术限制而令提供手语服务不可行，则无须提供手语传译；…	2017-10-04	成报	要闻港闻		581
通讯局令无线明年7月3日起 每日播手语传译粤语新闻 21:31	http://news.mingpao.com/ins/instantnews/web_tc/article/20171003/s00001/1507036528271	有聋人团体在今年香港小姐竞选决赛举行前去信无线，希望无线提供场地、拍摄器材等，让他们派员进行即时手语传译被拒。原来早在无线前年续牌时，行政长官会同行政会议已在牌照加入条文，规定无线须按指示在免费电视服务中提供手语传译。通讯局今日宣布，无线须由明年7月3日起，在明珠台每日播放提供手语传译的粤语新闻节目。多个听障人士及团体发表联署声明，欢迎通讯局决定，并就无线手语新闻节目提出建议。 根据通讯局的新规定，无线须于每日下午6时至午夜12时之间，在明珠台播放一个不少于15分钟、设有手语传译及繁体中文字幕的详尽粤语新闻节目。手语传译必须清晰可辨，让观众清楚看见。但若节目当中某些环节已有文字显示，或在某些情况下因技术限制而令提供手语服务不可行，则毋须提供手语传译。 通讯局称处理无线续牌时，已留意到听障人士对于在新闻节目提供手语传译的需求日增，但当时无线关注若实行手语规定，未必有足够的合资格手语传译员，…	2017-10-03	明报	即时港闻		903
中环出更：陈国超娶新抱 道教婚礼似粤语长片	http://orientaldaily.on.cc/cnt/news/20171014/00176_120.html	香港人结婚嘅仪式无非系喺教堂行礼，或者喺屋企同父母斟茶、拜下祖先。圆玄学院主席陈国超（超哥）早前娶新抱，一对新人就喺圆玄学院举行全港最大型嘅道教婚礼，首次饮新抱茶嘅超哥仲话，自己都系第一次参加道教婚礼，形容场面好似睇粤语长片咁喎！ 点解会谂到行道教婚礼？超哥话系新郎哥、即身兼仁爱堂副主席嘅大仔陈承邦嘅主意，加上圆玄学院信奉儒释道三教，所以就请香港道教联合会主席梁德华主礼。超哥话，原本只系预几十人参与，结果有二百几人到场，场面好墟冚。 梁德华：表达“敬天法祖”观念 本身系道士嘅梁德华话，今次都系佢第一次喺香港为道教婚礼主礼，虽然道教婚礼未至于失传，间中喺道教寺庙例如黄大仙祠都有举行，不过今次就系佢见过最隆重嘅一场。至于道教婚礼同其他婚礼嘅主要不同之处就系要表达中国人“敬天法祖”嘅伦理观，即系透过经赞感谢神明恩赐，同埋父母高堂养育之恩。 有份帮手筹备婚礼嘅圆玄学院副主席汤修齐就话，当日祈请学…	2017-10-14	东方日报	港闻	卓妮	692
无线明珠台粤语新闻 明年须提供手语传译	http://www.singpao.com.hk/index.php?fi=instantnews&id=7993	为配合听障人士更易取得资讯的需求，通讯事务管理局周二(3日)公布，根据电视广播有限公司（无线）的本地免费电视节目服务牌照的相关条件，指示无线由2018年7月3日起，在明珠台每日播放提供手语传译的粤语新闻节目。 无线须于每日下午6时至午夜12时之间，在其综合英语频道（即明珠台）播放一个不少于15分钟设有手语传译及繁体中文字幕的详尽粤语新闻节目。 通讯局表示，考虑到为新闻节目提供手语传译对无线来说是一项新的规定，通讯局决定给予无线9个月时间筹备及处理有关实行的事宜，以确保新规定能顺利落实，照顾听障人士的需要。	2017-10-03	成报	即时新闻		279
教大首名伊朗生学粤语融入本港研中国文化有志内地发展	http://stepaper.stheadline.com/news_content.asp?newsid=F02177.txt&newscat=F&newsdate=2017-11-09	教育大学今个学年首次取录来自伊朗的学生，只身来港的Mahdi Elyasi，正攻读全球及香港研究社会科学硕士。在港生活短短两个月，他已入乡随俗，学习广东话，又与港人一样爱上喝柠檬茶；Mahdi又发现两地文化不谋而合，如伊朗人都是以米饭为主食，庆祝等同中国农历新年的春节等。本报记者 来自伊朗的Mahdi，今个学年成为教大一分子，成为全球及香港研究社会科学硕士生。他在当地德黑兰大学就读农业机械工程系学位，其后攻读硕士课程，主修区域研究，副修东亚研究，令他有机会接触到普通话，对中国文化渐生兴趣，决心来港读书。 要融入本港生活，既新鲜又熟悉，他称，伊朗及中国文化有相似之处，“中国人口中的『cha』和伊朗人的『chai』，两者都是茶的意思，其实伊朗人都很喜欢喝茶。”他又记得初来报到时，看见港人最爱喝柠檬茶，令他感到新奇又意外，“现在我知了，原来柠檬茶很好喝！”他又指，伊朗与中国一样，以米饭为主食，…	2017-11-09	星岛日报	教育		877
教大首名伊朗生学粤语 融入本港研中国文化	http://www.stheadline.com/inews-content.php?cat=a&nid=243645	教育大学今个学年首次取录来自伊朗的学生，只身来港的MahdiElyasi，正攻读全球及香港研究社会科学硕士。在港生活短短两个月，他已入乡随俗，学习广东话，又与港人一样爱上喝柠檬茶；Mahdi又发现两地文化不谋而合，如伊朗人都是以米饭为主食，庆祝等同中国农历新年的春节等。 来自伊朗的Mahdi，今个学年成为教大一分子，成为全球及香港研究社会科学硕士生。他在当地德黑兰大学就读农业机械工程系学位，其后攻读硕士课程，主修区域研究，副修东亚研究，令他有机会接触到普通话，对中国文化渐生兴趣，决心来港读书。 要融入本港生活，既新鲜又熟悉，他称，伊朗及中国文化有相似之处，“中国人口中的『cha』和伊朗人的『chai』，两者都是茶的意思，其实伊朗人都很喜欢喝茶。”他又记得初来报到时，看见港人最爱喝柠檬茶，令他感到新奇又意外，“现在我知了，原来柠檬茶很好喝！”他又指，伊朗与中国一样，以米饭为主食，亦很重视春…	2017-11-09	头条日报	即时港闻		854
粤语导赏米埔自然游	http://paper.hket.com/article/1946647	由专业生态导赏员带领的米埔公众导赏活动，在自然保护区内走访两公里长的参观路线，包括基围、鱼塘、观鸟屋及野生生物教育中心等，欣赏生物多样性、认识湿地保育工作，并会免费借用双筒望远镜。 主办：世界自然基金会 费用：小童$240，成人$300 日期：星期五、六、日及公众假期（3小时） 查询：www.wwf.org.hk/	2017-11-14	经济日报	副刊		204
康文署电影合家欢亲子看戏贺圣诞现场粤语配音题材感人正面	http://stepaper.stheadline.com/news_content.asp?newsid=F03190.txt&newscat=F&newsdate=2017-12-01	还有一个月就是圣诞节，除了和家人一起相聚、观赏灯饰、交换礼物之外，也可相约看电影，感受节日气氛。Elsie知道，康文署电影节目办事处今年首次举办“圣诞电影合家欢”，挑选四部应节外国电影，分别是两部实景剧情片《双妹唛魔幻迷你圣诞》、《雪山男孩的奇妙旅程》；两部动画片《胡桃夹奇兵》及《食袜怪历险记》，于十二月二十三日至三十一日在香港电影资料馆电影院、STAR Cinema和康怡戏院放映，以窝心、感人的故事情节，带给观众一个快乐圣诞。 Elsie同负责筹备今次活动的电影节目办事处经理冯欣儿（Doris）倾过，知道康文署以往在暑假有举办过同类型节目，反应热烈，因此在获得资源下，首次在圣诞期间举办电影放映活动，让更多家庭观赏电影欢度节日。“活动最特别的是，在播放其中两套电影《胡桃夹奇兵》及《双妹唛魔幻迷你圣诞》时，会有现场粤语配音，由两位专业配音员即时为剧中所有角色配音，相信对于观众来说，是一个特…	2017-12-01	星岛日报	教育		1727
粤语夹杂英语 AI识别无难度初创“走少人走的路” 弃北上留港拓展	http://paper.hket.com/article/1961614	温豪夫和李安国，一位是在香港大学从本科直升博士、未毕业已立志创业的内地80后，一位是97年从美国名校回流、为港大的技术转移开山劈石的大学教授。 师生二人创办的人工智能（AI）初创公司Fano Labs（有光科技），研发可处理、分析混合语言及中国方言的语音识别技术，已有亚洲企业客户，最近获李嘉诚旗下的Horizons Ventures（维港投资）出手投资，是其少有相中的香港初创公司。两人冀凭资金扩充团队，加快抢占市场。 “我们的技术能明白混合语言，例如去机场问：Cathay Pacific嘅counter喺边度？又有广东话又英文，有时加上普通话，Siri都听不懂；另外，例如中国不同地方的普通话有不同口音，我们的技术可识别、分析。”港大电机电子系教授李安国说。坐在他身边是28岁的温豪夫——他指导过的博士生，今天是初创公司合伙人。 从港大衍生出来的Fano Labs研发人工智能语音及自然语言处…	2017-12-04	经济日报	要闻	邱婷	1605
趁年宵学创业 中学生推粤语环保袋	http://orientaldaily.on.cc/cnt/news/20170109/00176_051.html	【本报讯】年宵市场是不少年轻人创业从商小试牛刀的战场，惟满腹大计却苦无资金如何是好？为助年轻人一圆创业梦，有团体今年续办比赛，资助年轻人在旺角花墟公园年宵市场摆档学营商。四队获资助的队伍创意无限，推出自家制广东话谚语环保袋及多款怀旧产品，务求在年宵市场上大展拳脚。 九龙社团联会青年事务委员会今年续办第六届“年宵达人大比拼”比赛，由去年九月底起接受报名，共收到二十多队队伍报名参加，委员会最后选出四队入围队伍，合共资助十二万元，租用四个花墟公园年宵摊位及搭建费用等，协助年轻人在花墟公园年宵市场经营生意，学习营商之道。 主打怀旧产品赢得资助 其中一队入围队伍“宵小笑”，八名成员均来自元朗公立中学校友会邓兆棠中学，首次参与年宵市场摆档，他们将配合鸡年，推出自家设计以广东话谚语为主题的环保袋，如印有“静鸡鸡静啲定静静鸡静啲？”的环保袋，目标于年宵期间卖出四分之三货品。另一队入围队伍“大龙凤”则以传…	2017-01-09	东方日报	港闻		610
“盏鬼”广东话进幼稚园 首本校本粤语教材出炉	http://paper.wenweipo.com/2017/01/12/WY1701120001.htm	“你食咗饭未啊?”“早晨!”昨日，广东育才幼儿园大八班的小朋友们，上了一堂“盏鬼”的粤语课。来自五羊小学的周婉雯老师带领了四位五羊小学“小老师”，教幼儿园儿童说粤语。值得一提的是，周老师使用的教材，正是近日五羊小学推出了的“广州第一本校本粤语教材”--《粤读羊城》。综合大洋网及金羊网报道 课堂上，周婉雯用普通话和粤语两种语言交替上课，以便更好地让小朋友能懂普通话的同时也懂粤语。她带领的四位“小老师”采用了情景剧和游戏的方式为育才幼儿园的小朋友讲课，用情景剧教会小朋友们日常见面打招呼用语和饭桌礼仪等；用传“小象”的游戏巩固小朋友们对刚学习的粤语用语的记忆。小朋友们积极大声地学和说粤语。像“早晨”这样的打招呼用语，对于刚学粤语的小朋友而言还真的有点难，一不小心就会说成“走神”。每当此时，班上就会笑成一片。 全书六单元 教材生动有趣 《粤读羊城》全书分为六个单元，分别从粤语的简单用语、粤语童谣…	2017-01-12	文汇报	神州大地		750
穗小学校本教材 推广粤语	http://orientaldaily.on.cc/cnt/china_world/20170112/00178_026.html	【本报综合报道】广东近年不时出现反对“推普废粤”的声音，广州一间小学近日便推出可从幼儿园学起的粤语教材，从简单用语、童谣、粤语故事、粤剧等方面入手；通过练习、游戏方式，激发学生学、讲粤语，使本地孩子与外来的孩子都热爱粤语、热爱广州。 广州五羊小学最近推出《粤读羊城》，据称是广州第一本校本粤语教材，全书分为六个单元，分别为“粤说羊史”、“粤讲有礼”、“粤话精彩”、“粤唱童谣”、“粤听讲话”、“粤唱有戏”，全部源自广州日常生活。教材有普通话与粤语对照，图文并茂，还收录粤语讲古大师的“古仔”。 该校老师周婉雯日前到当地一间幼稚园，向学童上了一节粤语课，并介绍该套《粤读羊城》，使幼童对粤语感兴趣，讲粤语感自豪。	2017-01-12	东方日报	两岸		329
穗首现校本粤语教材	http://www1.hkej.com/dailynews/article/id/1472140/	《广东省国家通用语言文字规定》实施近5年，广州民众发现，愈来愈多小朋友不懂广州地道俗语，部分连粤语也讲不好。近日，坚持推动粤语教育的广州五羊小学推出了该市第一册校本粤语教材《粤读羊城》，不仅让校内学生从小学习地道粤语，师生还一起到幼稚园教幼童讲粤语，引起民间广泛关注。 老师带小学生教幼园生 《粤读羊城》以彩色印刷，图文并茂，全书分为6个单元，分别是“粤说羊史”、“粤讲有礼”、“粤话精采”、“粤唱童谣”、“粤听讲话”、“粤唱有戏”。课本教授粤语由学习广州地名开始，学生须与同学大声练习粤语对话。教材提出很多与普通话书面语不同的词语，例如担凳仔、行花街、几蚊鸡、姑婆等粤语常用词，加以解释，并收录很多有趣的粤语故事、粤语谚语、粤语语言艺术等内容。 1月9日，五羊小学的学生还在老师周婉雯的带领下，走进广东育才幼儿园大八班，进行“粤讲有礼”活动，给幼儿园的学童上了一堂“盏鬼”的粤语课。周婉雯用普通话…	2017-01-12	信报	两岸消息		828
搜查线：唔讲唔知 香港人未必识粤语字 (06:00)	http://m.on.cc/nc/hknews/20170109/20170109060018lc.html	【on.cc东网专讯】“咻”字应该读休？晓？“揦西”又是什么意思？“（口格）”字又要点读？学界一直认为香港没有一部粤语词典，坊间工具书亦是以教授读音为主。早前老外教授Robert Bauer决定以众筹形式推出一部追得上潮流的“粤英词典”，而亦有一批网民，发起了一个名为《粤典》的网上粤语词典计划，公开让网民更新粤语字及查字典，希望反映和保留香港粤语的真实语言现状。正如本身是大学学者的发起人刘择明所言，广东话是一种实实在在的语言，为什么不可以拥有自己的词典呢？ 不卖关子，首先开估！其实“咻”字读“嚣”，在现代的香港粤语中，其实就是“咗”的意思，不过它现时基本上已不再“存活”，因在19世纪80年代以后，用这个字的人已经买少见少。至于“（口格）”字，“格”字音，其实大家都会用，例如“你哋咁熟，实帮住佢（口架）”，不过就可能会用“（口格）”字代替。 这些字的读音用法，都经过考究查证。不过，网名“择…	2017-01-09	东方日报	即时港闻		1063
智能机器人小i进驻香江 研聘粤语研发人才 07:52	http://topick.hket.com/article/1618854/	内地人工智能（AI）智能机器人“小i”昨宣布进驻科学园，并指已跟中银香港、香港电讯洽商合作。 该公司直言，受落马洲河套发展吸引而来港，正计划招聘10多名以粤语为主的研发人员，惟所需的“知识工程师”在港难以觅得相关人才。 曾获市场研究机构Gartner称为“全球智能机械人最高水准代表”之一的小i，已成立15年，专注研发透过大数据及AI的智能机械人。 小i在内地担任不少大企、政府机构的“智能客服”，在短讯、微信等平台上解答客户疑难，如交通银行使用“智能客服”后，每日互动量达200万，若转换成人手则需要6,000人。 在招商银行的WeChat帐户中，所采用的是小i系统，它支援语音信息，分析用户提出的问题，如“怎样申请信用卡”，并即时提供答案。小i机器人总裁及CTO朱频频称，招行使用智能客服后，虽然减少客服人手，但客服并无失业，只是改为从事更多关于市场营销的工作。他相信，智能客服不会抢人的饭碗，…	2017-01-10	经济日报	即时社会		1104
穗小学推首份校本粤语教材 网民：有少少伤感 16:30	http://news.mingpao.com/ins/instantnews/web_tc/article/20170110/s00004/1484033243114	广州因外来人口迁入及政府政策影响，粤语面临“保育危机”。有广州的小学制作粤语教材，希望使学生更有系统地学习粤语。 广州五羊小学从2015年起，邀请广府文化学者饶原生为学生上粤语推广课，该校在今年更推出《粤读羊城》校本粤语教材。 五羊小学的教师昨日（9日）前往广东省育才幼儿园一院，为幼童上粤语课，从农历新年会用到的粤语入手，教导日常的问候用语、用餐用语，并以互动游戏激发儿童对粤语的兴趣与使用粤语的自豪感。 据报道，《粤读羊城》以深入浅出的方式，分别从粤语的简单用语、粤语童谣、粤语故事、粤剧等，以讲授、练习、游戏的方式，激发学生理解粤语、开口讲粤语，令广州本地及“新广州人”的儿童喜欢粤语。 幼儿园老师表示，每班几乎有半数小童习惯以普通话交流，当地家庭的小童因处于混杂的语言环境中，亦逐渐不讲粤语。 《粤读羊城》是五羊小学校长张永红与其他社会人士合作制作，张永红本身不会说粤语，但仍鼓励学生学粤语…	2017-01-10	明报	即时两岸		618
陈小春撑粤语 惹网民论战	http://china.hket.com/article/1656934	香港艺人陈小春前天在微博发文撑粤语，呼吁保卫广东话，又指广东话比普通话有更深厚文化，结果意外引起网民争议。 陈小春前天凌晨在微博刊出长篇文章，为粤语叫屈，呼吁保卫广东话。事缘前阵子他和一个湖北妹子在饭局聊天，被对方嫌弃“粤语没甚么好学的”、“粤语没文化”，令他十分不满。 陈小春发出的文章说，距有1,300年历史的唐诗宋词就是用粤语写的，所以用粤语才读得通顺。而普通话是500年前北方蒙满胡语杂交变种出来的，比粤语单薄粗疏多了。 据称，粤语其实并非早期广东香港本地的语言，而是古代的陕西、山西、河北地区的汉语，由于该地区的古代汉族人大量移民到广东，把这种语言带到了广东地区。而今天的粤语，因而保留了许多古代的语言痕迹。 陈小春在文列举了李白、杜甫等人的诗句，例证粤语是传承中华古代文明的载体，说粤语没文化实在是丢人。 陈小春这条长微博，引发了网友们的热议。不少人赞同他的建议，肯定粤语的价值，表示“…	2017-02-08	经济日报	中国要闻		737
港人自恋？陈小春微博撑粤语 意外掀论战... 08:00	http://china.hket.com/article/1655857/	保卫粤语再掀论战。香港艺人陈小春昨天在微博发文撑粤语，呼吁保卫广东话，又指广东话比普通话有更深厚文化，结果意外引起网民争议，有人支持，但也有称这是“港人自恋”、“香港人的自我优越感”。 陈小春昨天凌晨发布了长篇微博文章，为粤语叫屈，呼吁“保卫广东话”。事缘前阵子他和一个湖北妹子在饭局聊天，却被对方嫌弃“粤语没什么好学的”、“粤语没文化”，这令他十分不满。 陈小春说，距有1300年历史的唐诗宋词就是用“粤语”写的，所以用粤语才读的通顺。而普通话是500年前北方蒙满胡语杂交变种出来的，比粤语单薄粗疏多了。 香港艺人陈小春昨天在微博发文撑粤语，呼吁保卫广东话，又指广东话比普通话有更深厚文化，结果意外引起网民争议。 据了解，“粤语”其实并非早期广东香港本地的语言，而是古代的陕西、山西、河北地区的汉语，由于该地区的古代汉族人大量移民到广东，把这种语言带到了广东地区。而今天的粤语，因而保留了许多古代…	2017-02-07	经济日报	即时中国		992
南方方言多存古音粤语正宗纯属误会	http://stepaper.stheadline.com/news_content.asp?newsid=A14052.txt&newscat=A2&newsdate=2017-02-13	《中国诗词大会》成为热门话题，香港影星陈小春也加入讨论。本月六日，陈小春在微博声称“今已有一千三百年历史的唐诗宋词，其实大多数是用现今的所谓粤语写成”，引发舆论热议。有学者认为，粤语保留了古代汉语的词汇，但称唐诗宋词用粤语写就说法不妥。 陈小春罗列“保卫广东话”的种种理由，声称距今一千三百年历史的唐诗宋词，大多用粤语写成，用粤语才读得通。他还举出多例予以佐证，例如杜甫“朱门酒肉臭，路有冻死骨”，广东话常用“冻死”，而普通话则不用“冻”而用“冷”；又如李煜的“问君能有几多愁？恰似一江春水向东流”，广东话中常见“几多”，而普通话则多用“多少”。 复旦大学中文系副教授梁银峰表示，陈小春称唐诗宋词用粤语写就说法不妥。“古代文学作品是用当时的官话（唐朝以前叫雅言）写就，而不论官话还是雅言，都是北方话”。 梁银峰表示，粤语保留了古代汉语的词汇、语音现象亦不失为一种可能。这种现象并不是只有粤语中才存在…	2017-02-13	星岛日报	中国		453
影视藏品：射雕主题曲 唱出粤语歌新风	http://premium.mingpao.com/cfm/Content_News.cfm?Channel=ja&Path=101052807213/wqa2.cfm	【明报专讯】香港文化博物馆透过征集活动，从坊间征得多件珍贵的金庸藏品，其中佳艺电视剧集《射雕英雄传》和《神雕侠侣》的主题曲黑胶唱片，将在金庸馆开馆时展出。上述两张唱片目前市面已不易找到，从事粤语流行曲研究及创作的黄志华，说明它们可贵之处。他指出，上世纪七十年代中，香港电视主题曲风格有所转变及创新。他以由黄沾作词作曲的《射雕》主题曲为例：“以往的粤语歌内容多是伤春悲秋，少用『英雄』入词，而这首歌内容结构紧密，有明显主题，又有自问自答。一开首问『谁是大英雄』，最后答『立地顶天是大英雄』。”他指出以上两张唱片在曲风上，看到西方音乐对香港粤语歌的影响。“以往仍保留粤曲中的小调特色，软绵绵，但这首则刚烈雄浑，有西方交响乐的影子。” 邵氏金庸电影海报难求 是次征集活动也收到一批金庸作品改编电影的邵氏电影海报，香港电影海报收藏家林家乐表示，现时纯港产片买少见少，港人开始珍惜当年百分百“香港制造”，多了…	2017-02-21	明报	文学		517
每日一片：异乡听海阔天空 转粤语观众泪崩 (16:57)	http://m.on.cc/nc/hknews/20170226/20170226165702lc.html	【on.cc东网专讯】在外地生活，听到有人讲广东话时，都会感到特别亲切。日本东京街头近日有表演者在自弹自唱香港乐队Beyond的经典名曲《海阔天空》，他唱的是日语版，正当他唱得声嘶力竭时，在现场观看的一名疑似香港女子，跟着音乐节拍，以广东话插咀大唱“原谅我这一生不羁放纵爱自由”，表演者听到后产生共鸣，竟配合地改以广东话继续唱出《海阔天空》，女子听到熟悉的歌词，感动得即时泪流满面。 短片于东京一街头拍摄，当时表演者拿着结他，自弹自唱日文版的《海阔天空》，虽然他唱得非常落力，但围观的观众不多，仅得拍片者及一名未知是否香港人的女子。现场冷冷清清，但他依然唱得落力。唱到中途，疑似香港女子突以广东话插咀抢先唱出《海阔天空》的广东话歌词，表演者听到后，笑了一笑，随即跟随节拍，改以广东话献唱，两人合唱这曲：“原谅我这一生不羁放纵爱自由，也会怕有一天会跌倒，Oh No。”疑似香港女子大为感动，泪水不停涌…	2017-02-26	东方日报	即时港闻		530
游子东京街头粤语唱《海阔天空》 感动亿万网民因为...... 13:01	http://china.hket.com/article/1677510/	乡愁是什么？乡愁是互联网近日疯传的一段催泪短片。片中一名年轻男子手持结他，以沧桑的腔子弹唱香港乐队Beyond的《海阔天空》日文版，其后更与一名驻足观看、看著哭著的女子转用粤语唱下去，原来二人都来自中国，这一刻他们都想著故乡。 这段名为《他乡遇故知，东京街头一首海阔天空唱哭》的短片，自周六上载社交网站后热爆，首日点击量即高达4.4亿次。片中，一名男子抱著结他，在东京街头用日语自弹自唱《海阔天空》，熟悉的旋律，吸引了一个女子驻足聆听。 海南游子东演唱视频 一天4.4亿人次观看 戏剧性的一刻此时发生，女子孩突然情不自禁地跟著唱起了粤语版，男子迅速切换成粤语和女子一起唱。突如其来地听到乡音，女孩顿时眼泪下来了。 有内地媒体事后起底，发现这名演唱者是中国人，叫王小康，微博名叫“小海南刺青”。31岁的他来自海南临高，微博显示他现在居于深圳，是一名纹身师。 年轻中国男子手持结他，以沧桑的腔子弹唱香港…	2017-02-27	经济日报	即时中国		959
【看电视多一个选择】奇妙电视粤语频道5月14日晚启播 主打合家欢娱乐 16:37	http://news.mingpao.com/ins/instantnews/web_tc/article/20170315/s00001/1489566852756	免费电视奇妙电视的粤语频道（77台）将于5月14日晚启播，该台会以高清数码及模拟制式广播；而英语综合频道76台，预计于启播后12个月内投入服务。 奇妙电视主打合家欢娱乐，提供包括娱乐新闻、旅游饮食、生活资讯、自制剧集及亚洲人气剧集、本地及全球热门电影等节目。 奇妙电视的台徽以抽象图形设计，外形似细胞的台徽象征创意无限、跳出框框及满载动力。	2017-03-15	明报	即时港闻		194
回到粤语片时代罗致光扮鬼扮马	http://stepaper.stheadline.com/news_content.asp?newsid=A14039.txt&newscat=A1&newsdate=2018-11-18	今日是长者日。劳福局局长罗致光应中电邀请，昨提早跟二百五十名老友记一起过节庆祝长者日，齐齐拍摄经典粤语片剧照，回到五、六十年代美好记忆中。 中华总裁蒋东强（TK）同罗致光昨即场扮鬼扮马，同老友记一同拍摄粤语长片剧照；他又做一日歌手，孖住中学旧同学、东华三院执行总监苏佑安大唱经典金曲，在场老友记听出耳油。不少老友记话见到会场布置成怀旧戏院就好兴奋，勾起很多回忆。TK更大赞中电义工同老友记有倾有讲，做到长幼共融。 “和您一起过节”活动自一四年开始举办，先后与不同的社区伙伴合作，连同中电义工，曾陪伴超过三千多名长者及基层巿民欢度端午节、中秋节、长者日等多个佳节，并分享环保小贴士。	2018-11-18	星岛日报	维港会		306
长者日回到粤语片时代 罗致光扮鬼扮马	http://www.stheadline.com/inews-content.php?cat=a&nid=256339	今日是长者日。劳福局局长罗致光应中电邀请，昨提早跟二百五十名老友记一起过节庆祝长者日，齐齐拍摄经典粤语片剧照，回到五、六十年代美好记忆中。 中华总裁蒋东强（TK）同罗致光昨即场扮鬼扮马，同老友记一同拍摄粤语长片剧照；他又做一日歌手，孖住中学旧同学、东华三院执行总监苏佑安大唱经典金曲，在场老友记听出耳油。不少老友记话见到会场布置成怀旧戏院就好兴奋，勾起很多回忆。TK更大赞中电义工同老友记有倾有讲，做到长幼共融。 “和您一起过节”活动自一四年开始举办，先后与不同的社区伙伴合作，连同中电义工，曾陪伴超过三千多名长者及基层巿民欢度端午节、中秋节、长者日等多个佳节，并分享环保小贴士。	2018-11-18	头条日报	即时港闻		310
刘伟强为新戏打造粤语版本	http://stepaper.stheadline.com/news_content.asp?newsid=D04137.txt&newscat=D&newsdate=2018-11-28	由寰亚电影出品及发行的电影《武林怪兽》将于1月3日在香港上映，刘伟强导演、尔冬升监制，二人合力制作一部充满港式情怀幽默的电影，除了古天乐、方中信外，其余大部分均是内地演员，因此导演刘伟强誓要为香港观众专诚制作一个广东话版本，找来黎耀祥、卢海鹏（鹏哥）、万绮雯及林晓峰等为电影配音，好让入场的每一位更容易投入故事。 担任配音的祥仔表示：“拍《风云》时已认识刘伟强，都是二十年前的事，配音之余最主要系可以聚吓旧。聚旧时大家又钟意饮酒，今次真系合作得相当愉快。”鹏哥更觉得今次配音无难度。 文：娱乐组	2018-11-28	星岛日报	娱乐		267
【缘聚香江 中联办员工之窗】狮子山下粤语情	http://paper.wenweipo.com/2018/12/06/HK1812060008.htm	行财部 李旭鸿 “香港中联办员工掀起学粤语热”，10月份《人民日报》（海外版）的一篇报道引爆了朋友圈。来港两年半，一直想学说地道的粤语，期待与香港朋友“话与话相投，心与心相近”。幸运的是，王志民主任向中联办员工发出号召，“学粤语、讲粤语，把会粤语作为联系香港市民的基本功”。办里专门组织了培训班，所在行财部的领导也非常支持，我还被选为某基础班的班长，自然更是笨鸟先飞、快马加鞭，6个月以来，同事加同学，课堂与生活，每日打卡听说粤语已成为我新的生活习惯。随着学习听说和研究的深入，探究富矿，应用点滴，粤语承载的文化历史、香江风情、时代变迁，交相辉映。 粤语独特而深厚的历史风情。为了激发学习的乐趣，练习难读声母韵母，追根溯源，我逐步深入了解到，粤语不是古代“粤人”的语言，而是中国古代普通话的活化石。粤语的主要来源是古代中原的普通话--“雅言”。雅言的基础是以黄帝为首的华夏部落联盟使用的原始华夏语。…	2018-12-06	文汇报	港闻		2002
苹果将推粤语版智能扬声器	https://skypost.ulifestyle.com.hk/article/2224913/	苹果宣布，将在港推出智能家居扬声器HomePod，可支援广东话，其内置Siri可记录用户喜好并进行调整，播放用户喜欢的歌曲或类似的新歌。 硬件方面，HomePod内有6个咪高峰，加上A8处理器，用户不需提高声量也可作出指令，说出“喂Siri”后，用户的说话会加密，其后以匿名方式传送到苹果伺服器。 HomePod已显示于苹果网站，但未有具体发售日期，只称将于明年初推出，定价为2,799元，备有白色或太空灰色。	2018-12-07	晴报	港闻		225
粤语金曲演唱会30日广州举行	http://today.hkcd.com/content/2018-12/10/content_1113497.html	【香港商报讯】记者余乐祖报道：大浪音乐文化旗下“香港大浪交响乐团”上周六在西九龙中心举行记者招待会，并宣布“70 80 90 黄金年代经典粤语金曲交响演唱会（广州站）”将于本月30日晚上7时30分，于首站广州白云会议中心世纪大会堂隆重举行。 传统和现代艺术擦新火花 将于演唱会上献唱的香港歌手，包括太极乐队主音雷有辉、歌手吕乔恩、吴梓俊等，还有著名作曲人柳重言的多首经典作品，包括歌迷均耳熟能详的陈奕迅《今日》、王菲《偿还》、许志安《昨迟人》等。主办单位相信，届时台上台下都能一起感受传统和现代艺术擦出的新火花。 据介绍，该演唱会由“大浪音乐文化产业有限公司”，“塔斯肯顿国际艺术教育”及“两岸四地青少年美育文化发展基金会”联合主办。 “香港大浪交响乐团”以香港为基地，以本土专业乐手为核心，以大湾区文化融和为前期目标，以流行歌曲和管弦乐两类完全不同风格的音乐合并，改变普罗大众对交响乐的印象。	2018-12-10	香港商报	香港新闻		435
搜查线：粤语词汇唔俗气 “畀钱”“鸡髀”系古字？ (06:00)	http://m.on.cc/nc/hknews/20181205/20181205060043lc.html	【on.cc东网专讯】普遍人都会觉得，我哋平时沟通用嘅粤语用字太“口语”、“通俗”，好难入文。不过，有钻研粤语字词嘅拔萃男书院前老师黄树坚就反驳呢个讲法，“根本唔系粤语俗，而系太古雅！”喺研究粤语到底有几古雅之前，我哋率先做咗个街访，发现原来好多后生仔都唔识一啲粤语嘅正写系啲咩。到底有咩粤语词汇咁古雅？你又识得边几个？ 啲粥好“杰”个“杰”字点写？ 答案系……“渴”！虽然呢个字依家系读“渴（音喝）”，但喺古书入面，佢个音系“渠列切”，读“杰（音杰）”，亦都同“竭（音揭）”字通用，意思即系水乾涸咁解。《左传》记载，“山崩川竭，亡之征也。”山塌陷同流水乾涸，系“亡”嘅象征。所以，啲粥好“杰”，应该系用“渴”，表示啲粥入面冇咩水喇。 畀钱系“畀”定“俾”？ 如果系话“畀”钱，呢个先系正写。黄笑言“好古雅！唔好以为『给』系文雅，『畀』好俗，啱啱相反。”“畀”字早喺3000几年前喺甲骨文上出现过，…	2018-12-05	东方日报	即时港闻		1402
熟读粤语九声 “呃like”有心得	http://paper.wenweipo.com/2018/12/17/HK1812170008.htm	Chemsir与亚伯林将科学知识变成歌词代入流行曲中二次创作，既鬼马又有知识性，深受学生欢迎。其中亚伯林自中学时期起已对作曲填词甚有研究，曾开办工作坊分享其填词心得，他又向记者公开其填词3大秘诀-Deadline（死线）、倒果为因及熟读粤语九声。Chemsir则提到，他们亦会积极为二创歌曲及MV“呃like”，包括配合电视剧大结局的时机。 亚伯林中一起已开始自行作曲填词，曾写过情歌、贺年歌及圣诗等。他笑言，其实填词并不难，但必须有死线，因为平日教职繁忙，在压力下工作才特别有效率。 他又分享其“倒果为因”的填词方程式，即以倒叙方式撰写，如先考虑歌词最后一个字要押韵，从而再想词语及组成句子；另外亦需要熟悉粤语九声声调，就可填写出“啱音”的粤语歌词，但过程需要花功夫。 此外，亚伯林亦加入了一个专业填词人的社交群组，闲时会互相交流，分享心得，向他们取经。 因为科学歌曲成为网红，二人对经营社交媒体…	2018-12-17	文汇报	港闻		675
港式粤语融入内地四十年	http://today.hkcd.com/content/2018-12/26/content_1116410.html	香港作为现代化工商业港口大都市、世界贸易和金融中心之一，长期以来是内地了解国际发展、全球文化的重要窗口，其语言词汇能敏锐地捕捉并记录下新兴的文化和事物，由此产生大批英源式粤语词汇。港式粤语词汇的特点就是新奇鲜活、生动形象、富有表现力，例如：纸黄金、九九金、劲爆、咸猪手、楼花、炒楼、鬼佬、股市、牛市、卡拉OK、雅思。这些新鲜的词汇在改革开放大潮中大量涌入内地并被广泛接受，不但丰富了普通话词汇、增强普通话表现力，同时还满足了改革开放时期对新鲜事物命名的借鉴需求。 词汇融合闹笑话 然而，由词汇融合导致的笑话也不少见。例如，草莓在香港叫“士多啤梨”，是英文“strawberry”的音译词。随着市场对进口水果的需求，本世纪初，广州等地水果商也逐渐使用“士多啤梨”这个洋气的名字，顺势提高草莓售卖价格。笔者当时有一位朋友从内陆地区来到广州，看着水果摊上“士多啤梨”的标签，仔细端详好一阵，然后说：“嗯，…	2018-12-26	香港商报	香江评论	李淑芳	1756
获林夕帮手杨峰取得《至少还有你》粤语版版权 20:01	http://std.stheadline.com/instant/articles/detail/897472-%E5%A8%9B%E6%A8%82-%E7%8D%B2%E6%9E%97%E5%A4%95%E5%B9%AB%E6%89%8B+%E6%A5%8A%E5%B3%B0%E5%8F%96%E5%BE%97%E3%80%8A%E8%87%B3%E5%B0%91%E9%82%84%E6%9C%89%E4%BD%A0%E3%80%8B%E7%B2%B5%E8%AA%9E%E7%89%88%E7%89	杨峰推出个人首张唱片《也许....最后》，契妈黄夏蕙及好友赵哲妤一起到公展会支持他。杨峰称，早前受内地电视台邀请将林忆莲的一曲《至少还有你》填写粤语版歌词给忆莲唱，由于新词讲述以往感情，忆莲为免尶尬要求他再写过，由于杨峰没时间重写，索性改为找林夕取此曲的版权，在林夕帮忙下拿得版权后，杨峰将此广东版“至少还有你”放在自己新碟内。 他说：“有了这歌的独家广东版，就算花多小钱我也要令这首歌获得更多人的认识。赵哲妤称，一到场便收到杨峰的礼物，只因杨峰邀请她再次合作，为他已经开始筹备的新歌一起合唱。	2018-12-27	星岛日报	即时娱乐		258
获林夕帮手 杨峰取得《至少还有你》粤语版版权	http://www.stheadline.com/inews-content.php?cat=f&nid=285871	杨峰推出个人首张唱片《也许....最后》，契妈黄夏蕙及好友赵哲妤一起到公展会支持他。杨峰称，早前受内地电视台邀请将林忆莲的一曲《至少还有你》填写粤语版歌词给忆莲唱，由于新词讲述以往感情，忆莲为免尶尬要求他再写过，由于杨峰没时间重写，索性改为找林夕取此曲的版权，在林夕帮忙下拿得版权后，杨峰将此广东版“至少还有你”放在自己新碟内。 他说：“有了这歌的独家广东版，就算花多小钱我也要令这首歌获得更多人的认识。赵哲妤称，一到场便收到杨峰的礼物，只因杨峰邀请她再次合作，为他已经开始筹备的新歌一起合唱。	2018-12-27	头条日报	即时娱乐		258
特首斥无风起浪局长母语是粤语	http://stepaper.stheadline.com/news_content.asp?newsid=A14052.txt&newscat=A1&newsdate=2018-05-09	特首林郑月娥早前在立法会答问大会表示，留意到近日教育界无风起浪。事缘教育局在小学中文网上的教学资源网页上载了一篇文章，内容提及粤语只是汉语的其中一种方言，严格来说并非母语，惹起本地一些学者和网民激烈讨论。上届教育局局长民望低，领导不济，令到不少教育问题未被正视，甚至恶化，不少教育议题更经常被政治化，教育界和家长们均怨声载道。现届教育局局长杨润雄作风务实，肯接受意见，大家应回归理性，携手去处理教育上的种种问题，切忌无风起浪，激起无谓的争议，令教育发展停滞不前。 两文三语不变 普通话比例增 面对传媒的追问，杨润雄局长的应对和处理危机能力，比吴克俭前局长确胜一筹。杨润雄斩钉截铁向公众说明，政府是无意改变现时两文三语的语言政策，亦清晰回应自己母语是粤语。在出席公开活动时，他更特意与示威者公开对话，就教育议题进行理性讨论，态度诚恳，并接收了请愿信。姑勿论示威人士是否接受他的回答，但他立场坚定，敢担…	2018-05-09	星岛日报	自成一派	林大辉	890
政府铲粤语开错头	http://stepaper.stheadline.com/news_content.asp?newsid=E04124.txt&newscat=E&newsdate=2018-05-12	特区政府教育局引用中国内地某北方“荣誉专家顾问”的权威文章，指香港人的母语不可是粤语，引起轩然大波。 中方受到近年香港伞运和港独意识的刺激，开始釜底抽薪，认为要摧毁港独的土壤，必先对付广东话。若要对付广东话，则必先由中小学课程着手。 不幸董建华又早将粤语列为“两文三语”之一，亦即粤语为香港中小学“母语教学”的第一语文。教物理化学生物、历史地理，即使中文中学，也用粤语讲解，殖民地时代相安无事。只有极少数如北角的苏浙和福建中学，因便利刚由内地来香港的移民子女，用江浙或福建话授课，香港殖民地政府不予承认，但也从不干预。 现在，特区政府有意将两文三语中的粤语剔除，岂知方法错误，手段过分粗暴，以至打草惊蛇，反而激起包括影视界艺人的反抗。 几十年港产片的经典由《醉拳》、《蛇形刁手》到《省港旗兵》和《英雄本色》，全部是粤语片。成龙、徐克、袁和平，无一不靠电影中的粤语起家而发迹。上了岸的大可以与中央同一…	2018-05-12	星岛日报	副刊		603
【粤语非母语？】刘梦熊爆seed：广东话就是母语 轰“杞人无事忧天倾” 09:02	http://news.mingpao.com/ins/instantnews/web_tc/article/20180509/s00001/1525824285043	教育局网上教学资源页面年前上载学者文章，提及“粤语”只是方言，不符“母语”之义文章，引起争议。前政协委员刘梦熊在facebook铺文回应，自言“不吐不快”，强调“广东话就是母语”。 刘梦熊昨午在fb以〈粤语就是母语〉为题发帖，明言“香港人、广东人的母语就是广东话，绝对唔需要『犹抱琵琶半遮面』”，反问：“唔通上海人话自己嘅母语系上海话，都要被人扣上『分裂国家』、『沪独』嘅帽子？真系『杞人无事忧天倾』！” 刘梦熊又说，前国家主席江泽民到广东视察、访问洛杉矶华侨时，都入乡随俗讲两句广东话，不明白“点解有啲港官要千方百计矮化广东话嘅地位”。他又特别标签了“#广东话就是母语”、“#不吐不快”。 同样曾任政协、现任自由党荣誉主席田北俊日前亦在fb“爆seed”，直指“如果有人同你讲香港人母语系汉语，你只需要用广东话中嘅一只字回敬佢就得啦，唔使用剑嘅”。至于是哪个字，留待田北俊原帖解答了。他又标签了“…	2018-05-09	明报	即时港闻		449
【粤语非母语？】曾钰成拆解：点止普教中咁简单 指影响深远 08:31	http://news.mingpao.com/ins/instantnews/web_tc/article/20180510/s00001/1525911370223	教育局网上教学资源页面一篇称粤语只是“方言”，不符“母语”之义的学者文章，引起争议。立法会前主席曾钰成认为，会对中国语文教育发展产生深远影响，直言：“点止普教中咁简单？” 曾钰成于《am730》专栏以〈你讲乜话〉为题撰文，先提及自己近日出席一个研讨会，听到一位政府官员用蹩脚的普通话演说，“一篇本来十余分钟可以讲完的演辞，她多花了起码一半时间；不论是否说普通话的听众，都几乎没法知道她在说什么。为什么会有这样的问题？因为普通话不是这位官员的母语，而她又没有把普通话学好。什么是她的母语？粤语”。 曾钰成之后谈及有关文章说香港人大部分是汉族，“香港汉族人的母语是汉语”，不是粤语，“根据这位专家的理论，我们可以想像以下的情景：在上面提及的研讨会上，主持人见到讲者的『普通话』没有人听得懂，便对她说：『请用你的母语发言吧。』讲者如释重负，立即转用粤语发言。谁知主持人却制止她，说：『你的母语不是粤语，是…	2018-05-10	明报	即时港闻		715
曾钰成：绝大多数港人的母语是粤语	https://www.am730.com.hk/news/%E6%96%B0%E8%81%9E/%e6%9b%be%e9%88%ba%e6%88%90%ef%bc%9a%e7%b5%95%e5%a4%a7%e5%a4%9a%e6%95%b8%e6%b8%af%e4%ba%ba%e7%9a%84%e6%af%8d%e8%aa%9e%e6%98%af%e7%b2%b5%e8%aa%9e-126113	粤语是否母语近日引起争议，立法会前主席曾钰成再就有关问题在本报撰文，表明他对粤语、母语及母语教学的看法，“我认为：第一、绝大多数香港人的母语是粤语；第二、香港学校里大多数学生的母语是粤语，推行母语教学，就是以粤语作为各个科目(除了外语科)的教学语言。” 曾钰成在《钰成其事》专栏以〈粤语地位〉为题撰文，他指近期的争论，是由中大普通话教育研究及发展中心顾问宋欣桥的一篇文章引起的。“文章说，粤语只是方言而不是语言，因而不能成为『母语』。宋先生又认为，『香港汉族人』的母语是汉语，而普通话是现代汉语标准语，所以普通话教育是最标准的『母语教育』。这些观点，我当然不能同意。” “宋先生的理论，完全建立在『粤语是方言而不是语言，因此粤语不是母语』这一命题上。推翻这命题，他的整套理论便不成立。” 曾钰成在文中又说，粤语在香港一直享有正式语言的地位，他举例指特首发表施政报告、立法会议员就职宣誓、法官用中文宣…	2018-05-14	am730	新闻		611
粤语地位	https://www.am730.com.hk/column/%E6%96%B0%E8%81%9E/%e7%b2%b5%e8%aa%9e%e5%9c%b0%e4%bd%8d-126184	本栏上一篇文章，似乎好些人没有看懂。为澄清误会，我在这里简单直接地说明我对粤语、“母语”和“母语教学”的看法。我认为：第一、绝大多数香港人的母语是粤语；第二、香港学校里大多数学生的母语是粤语，推行母语教学，就是以粤语作为各个科目(除了外语科)的教学语言。 这是我一贯的看法，并非只是对近期有关争论的回应。 近期的争论，是由中文大学普通话教育研究及发展中心顾问宋欣桥的一篇文章引起的。文章说，粤语只是方言而不是语言，因而不能成为“母语”。宋先生又认为，“香港汉族人”的母语是汉语，而普通话是现代汉语标准语，所以普通话教育是最标准的“母语教育”。这些观点，我当然不能同意。 宋先生的理论，完全建立在“粤语是方言而不是语言，因此粤语不是母语”这一命题上。推翻这命题，他的整套理论便不成立。 许多语言学者认为，“方言”和“语言”的区别，其实没有严格的标准。普通话成为“现代汉语标准语”，是人为造成的：只是因…	2018-05-14	am730	新闻		865
反“港独”才能保护粤语文化	http://124.243.200.100/a.php?f=20180517/lta-2.txt	香港最近出现“粤语是否香港人母语”的争议。有人在教育局网站翻出一篇在2013年刊登的文章，煽动所谓“香港政府要打压粤语”的恐慌。特首林郑月娥在立法会被反对派议员追问她的母语是什么，教育局长杨润雄也被三番四次地追问“母语”问题。尽管两人都否认政府要推行“普教中”，反对派还不依不饶。 平心而论，从学术的视角，文章作者宋欣桥教授认为“香港人的母语不是粤语”，确实存在很多商榷点。文中没有厘清几个含糊的概念：何为语言？何为母语？何为香港人？ 厘清“香港人”“母语”定义 严格地说，语言的基本含义就是“口头语”。《诗经．大雅．公刘》有“于时言言，于时语语”；注解为“直言曰言，谓一人自言；答难曰语，谓二人相对”。故此语言本意就是以声音传递为基础的一套系统。“语言”之后才有“语文”：“语”还是指口语，“文”即指文字，后来又用“书面语”指代文字系统。文字以口头语为基础，是很晚才出现的事物，甚至不是每一种语言…	2018-05-17	大公报	大公评论(香港)	闻昱行	2973
【粤语非母语？】港大李辉：普通话是港1.5语言 梁美芬：普粤是“亲兄弟” 17:24	http://news.mingpao.com/ins/instantnews/web_tc/article/20180510/s00001/1525943737755	教育局网上教学资源页面一篇称粤语只是“方言”，不符“母语”之义的学者文章，引起争议。语言学家、港大教育学院副教授李辉形容，普通话是香港“第1.5语言”；经民联立法会议员梁美芬则形容，普通话与广东话是“亲兄弟”，应相亲相爱而非排斥。 港大教育学院副教授李辉于港台节目表示，香港人“口语”是广东话，但人类语言分两种形式，一种是“书面语”，一种叫“口语”：“香港人口语无疑问是广东话，但书面用的是现代标准汉语，对应的口语是普通话。” 李辉又说，普通话不是香港第二语言，是香港“1.5语言”“不是第二，也不是第一，是介乎第一与第二之间”。 李辉之后强调，“作为外来香港人、新移民，来香港20年，我是撑广东话的，我都是撑普通话的，我觉得两个不矛盾的”。他解释，作为“国家共同语言”，普通话值得推广，而作为“交流语言”，普通话科必须存在及推广。对于广东话，他形容是香港共同语言，需要保存、推广及标准化，“有需要…	2018-05-10	明报	即时港闻		756
【粤语非母语？】曾钰成：用与现代汉语差异来贬低粤语，是不懂粤语者偏见 08:29	http://news.mingpao.com/ins/instantnews/web_tc/article/20180514/s00001/1526256049508	教育局网站一篇讲述“粤语”非“母语”的文章，引起外界反弹。立法会前主席曾钰成再于《am730》专栏谈及事件，认为“用粤语和现代汉语的差异来贬低粤语的地位，只是不懂粤语的人的偏见”。 专栏题为〈粤语地位〉，曾钰成直言不能同意文章观点，“宋先生（文章作者、中文大学普通话教育研究及发展中心顾问宋欣桥）的理论，完全建立在『粤语是方言而不是语言，因此粤语不是母语』这一命题上。推翻这命题，他的整套理论便不成立”。 曾钰成举例，许多语言学者认为“方言”和“语言”的区别，没有严格标准，“普通话成为『现代汉语标准语』，是人为造成的：只是因为官方指定，而不是因为普通话本质上比粤语有什么优越性”。他又引述复旦大学教授周振鹤、游汝杰合著的《方言与中国文化》指出：“且不管大多数人所说的普通话都是带有方言特征的，就是标准的普通话也是『以北京语音为标准音，以北方话为基础方言』的。北京话和北方话当然也是方言。” 曾钰成…	2018-05-14	明报	即时港闻		643
曾钰成:绝大多数港人的母语是粤语 12:32	http://192.168.0.5/hkejjs/2018-05-14/1842322.html	教育局网站早前引用中文大学普通话教育研究及发展中心顾问宋欣桥一篇文章，引起社会上「粤语」非「母语」争议。 立法会前主席曾钰成于报纸专栏谈及事件，认为用粤语和现代汉语的差异来贬低粤语的地位，只是不懂粤语的人的偏见。 曾钰成指出，文章作者的理论建立在「粤语是方言而不是语言，因此粤语不是母语」上，推翻这命题，整套理论便不成立。 曾钰成又举例称，许多语言学者认为「方言」和「语言」没有严格标准，普通话成为现代汉语标准语，不过是官方指定，而不是因为普通话本质上比粤语有什么优越性。 他又认为，即使标准普通话也是以北京语音为标准音，以北方话为基础方言的，而北京话和北方话当然也是方言。 曾钰成强调，绝大多数香港人的母语是粤语，学校里大多数学生的母语是粤语，母语教学，就是以粤语作为各个科目的教学语言。	2018-05-14	信报	即时时事脉搏		402
为觅玩伴焗讲粤语	http://stepaper.stheadline.com/news_content.asp?newsid=H08203.txt&newscat=H&newsdate=2018-05-18	最近见到一对小姊弟，分别三岁和两岁，父母都是香港人，他们却只以英语交谈。或许有些香港父母，希望子女入读名校或国际学校，担心子女英文不够好，于是在家里也说英语，以便收耳濡目染。可是，这对小姊弟的父亲，完全不谙英语，并不属于上述情况。唯一的解释是，父母工作繁忙，把子女交菲佣打理，菲佣跟他们说的话，远多于父母。小姊弟的母语是英语，不是粤语。 以往常以英语跟小姊弟沟通的母亲，开始察觉出了问题，近日已较多在他们面前说粤语了。小姊弟大致听得懂粤语，就是不肯说，可能是自尊心作祟，怕说得不好会给人取笑，始终说着自己掌握得到的英语。 母亲想出了一个办法，就是在他们入读幼稚园时，一读便读两间！上午读以粤语教学的普通幼稚园，下午才读以英语教学的国际学校。反正幼稚园主要是玩游戏，读两间也不会怎样辛苦。 果然善法。同学都说粤语，不说粤语便交不到朋友，交不到朋友便没有人一起玩耍。为了玩耍，不会不说，简单实惠！ yu…	2018-05-18	星岛日报	马经		484
“粤语系母语”非真确 中大生会声明难产	http://paper.wenweipo.com/2018/05/19/HK1805190034.htm	（记者 陈川）教育局向学校提供一系列有关普通话的参考文章，反对派就故意抽出其中一篇指粤语不能被视为“母语”，借此大做文章。中大学生会干事会于本月2日发表题为“粤语系香港人嘅母语”的声明。代表会在本周二第三次临时会议上，讨论追认干事会“粤语系香港人嘅母语-中大学生会回应教育局之声明”。不过，多名代表质疑“粤语系香港人嘅母语”说法并不准确，代表会最终决议指示干事会修正声明。不过，干事会拒绝修改。 根据中大学生报报道，代表会成员梁溢希及林安生均称，有不少香港人的母语并非广东话，而是英语、客家话、潮州话等，“母语论”失实地陈述（misrepresent）香港现况，又声言应当捍卫“广东雅言”作为“官话”或“官方语言”的地位，但非作为“香港人的母语”。 干事会回应称，声明回应的是“粤语不能视为母语”的说法，故声明的侧重点是强调“粤语是香港人的母语”。 在第一次表决时，赞成人数刚好为在席代表一半（22…	2018-05-19	文汇报	港闻		930
我的母语不是粤语，却又感觉同在漩涡中	http://premium.mingpao.com/cfm/Content_News.cfm?Channel=ja&Path=33701456711/uzc1.cfm	【明报专讯】来港四年，不短不长，这四年风波不少，自己也成为“运动”旧人了。雨伞运动时，正值上学期间，因为好奇心，不知聚众上街会是什么模样，便克服恐惧去“参观”，一转眼，彷佛已经是上世纪的事情。 最近的一件事，好像与我无关，却又感觉同在漩涡中。有网民发现教育局网上教学资源页面上载了一篇学者文章，文中称粤语不符“母语”的定义，“香港人中绝大多数人的民族属于汉族。那么，有关香港人母语的较为确切的表述应该是：香港汉族人的母语是汉语”，后面推论便是对于香港学生，普通话教育才是标准的“母语教育”，林郑月娥在立法会答问会驳斥教育界这次是无风起浪，特首这样的态度，不禁让公众扪心自问母语究竟是什么，热门话题自是上榜。近日开骚的两名香港歌手梁咏琪和古巨基，甚至在红馆发声他们的母语是广东话。 如按专家文中所说，香港开埠以来，操粤语的广府人逐渐成为香港华人族群的主体，粤语理所当然成为香港人的母语。如果自问，我的…	2018-05-13	明报	星期日生活		1617
中国法律服务网引进粤语	http://124.243.200.100/a.php?f=20180521/zm-35.txt	【大公报讯】记者赵一存北京报道：中国法律服务网20日正式上线，中国司法部副部长熊选国在当日的新闻发布会上表示，建设中国法律服务网，是要打造覆盖全国的整体联动、省级统筹、一网办理的“互联网公共法律服务”技术和服务体系。通过这一系统，公众可以咨询相关法律问题、查询律师和司法鉴定机构等信息，亦可以对法律法规草案等提出意见。 熊选国表示，网站的智能法律咨询系统提供24小时在线自助服务，根据公众输入问题，系统自动生成免费的“法律咨询意见书”，目前已实现婚姻问题、劳动纠纷、工伤赔偿等六类案件类型。 此外，中国法律服务网还有语音咨询功能，司法部当前正引进港澳台语言，特别是粤语，通过这些语言的提问也能得到及时的回答和解决。	2018-05-21	大公报	中国特稿		331
新闻追踪：母语非粤语？	http://premium.mingpao.com/cfm/Content_News.cfm?Channel=gb&Path=67402940142/gfv1_er.cfm	【明报专讯】早前有网民发现，教育局网上教学资源网页年前上载学者文章，内容提及粤语只是方言，并非“母语”。文章指港人多数是汉族，所以母语应为汉语，普通话才是“正规的语言教育”。文章引起争论，不少港人认为粤语就是自己的母语，你的看法又如何？ 母语是什么？ 根据联合国教科文组织（UNESCO）定义，母语指“一个人自幼习得的语言，通常是其思维与交流的自然工具”。港大中文教育研究中心总监谢锡金指出，父母所说语言就是“母语”，因此粤语是本港大部分人的母语。母语因人而异，除了粤语，香港也有小部分人以其他语言作为母语（见表）。 粤语的来源 粤语又称广东话、广州话或广府话，是汉语方言之一，为广东、广西等地区人民广泛使用。秦代以前，居住在广东、广西地区的人大多是少数民族，称为“百越”，他们的语言跟中原汉人不同。后来大批中原汉人南下，带来中原汉语，与当地百越语融合，于是发展出粤语。粤语在词汇、语法、声调上都与…	2018-05-21	明报	教育		1639
将粤语称作方言并非矮化	http://124.243.200.100/a.php?f=20180522/lta-2.txt	早一阵子，“粤普之争”又再成了城中热话。一篇2013年已被教育局列入小学普通话课程配套资料的文章，突然间被网民挖了出来，声称该文主张“粤语不是母语”，强调“粤语是方言”，随即引来媒体关注。及后，经民联梁美芬在立法会会议上，以普通话演绎李白的《将进酒》，指出有些诗用粤语朗读较好，但有些以普通话演绎都悦耳，不要用以政治角度看待语言问题，又惹来了一番非议。 笔者明白，随着国力日隆，普通话的国际影响力不断增加，部分人开始担心，粤语在香港能否保住其共同语地位。然而，在一众批判声音的背后，却有一些概念确实需要稍作澄清。诚然，作者宋欣桥教授对于“母语”的定义，跟一般人的理解不同，自然容易惹起争议。然而，部分人质疑他矮化粤语，笔者却不敢苟同。其实，他只是认为“母语”的“语”，应该是指“语种”，而粤语是一种汉语方言，所以不宜把“粤语”称作“母语”，而应改称作“母言”。 宋教授为何有此划分，主因是中国是一个…	2018-05-22	大公报	大公评论(香港)	文兆基	1224
“母言”或“母语”均不损粤语教学地位	http://124.243.200.100/a.php?f=20180523/lta-2.txt	网民近日在教育局网站挖出一篇数年前刊载、由内地学者宋欣桥撰写的文章，再次掀起“粤普之争”，部分人忧虑“母语”环境被改变。撇开“普通话赚钱”的说辞，只说建制派提出的语言学观点。其一，香港人的“母语”真的不是粤语，“港式粤语”有其独特口音，难独占“粤语”二字。然而，笔者想指出这是白马非马的逻辑问题，固然多数港人“母语”不是粤语，但肯定是“一种粤语”而且和粤语互通。其二，部分港人母语是闽南话、客家话、上海话等方言。笔者较同意这一点，上世纪四十至八十年代初的大量内地移民来港，令香港成为中国大江南北不同族群熔炉，这些方言和粤语不能互通，因此他们其实一直生活于非母语环境，但这些移民的后代即今天的青壮新一代，母语确是粤语。即使每天有内地人持单程证来港，亦撼动不了这状态，若说香港人“母语”都是粤语，确伤害了新来港人士，但根据多数人而制订的语言政策，如母语教学则不太受影响。 宋欣桥先生其实“明换逻辑”，他…	2018-05-23	大公报	大公评论(香港)	甘希文	1058
【粤语非母语？】Ben Sir：撑广东话靠小朋友 倡教写书面语 12:01	http://news.mingpao.com/ins/instantnews/web_tc/article/20180520/s00001/1526787217761	教育局网站一篇称“粤语”不符“母语”之义文章，引起热论，一直推广广东话的中大中文系前高级讲师欧阳伟豪（Ben Sir）认为，撑广东话是“靠小朋友”，强调广东话须同时发展口语及书面语。 “粤语”与“普通话”同是中文体系语言，不过形容一样事物时，经常会有不同讲法，例如广东话说“番薯”，在普通话是 “地瓜”等等。近日就有传媒进行街头测试，发现本港新一代学生虽然认同自己“母语”是广东话，用广东话亦更开心，惟未必懂得广东话用字，像把“行雷”讲成“打雷”、“电单车”读作“摩托车”。 不少看过片段网民直指“好得人惊”，担心广东话会慢慢消失。Ben Sir亦有分享相关片段，但呼吁网民“振作”，强调“语言要靠人用，撑广东话唔系靠Ben Sir，系靠小朋友！” 他认为要教小朋友写广东话，因“广东话要同时发展口语同书面语才够整全”，并特别标签了“#广东话书面语”。 教育局被发现年前在小学中文网上教学资源页面，…	2018-05-20	明报	即时港闻		624
菲华侨练粤语 日读1小时报纸	http://paper.hket.com/article/2081713	卢凯恩是菲律宾华侨，却成为迪士尼香港及台湾区总经理，整个访问过程中，主要以广东话交谈，说穿了，努力始终是成功的不二法门，“有两年时间每天读一小时报纸，一字一句学落去。” 卢凯恩亦是一个电影爱好者，“今年45岁，由5至6岁开始看电影，有40年经验”，努力读报纸的另一大得着是可以享受广东话的独门幽默感。 成功邀“奇异博士”来港 除努力外，作为主管级人马，亦要有策略性发展，卢凯恩忆述其中一个一个最成功例子为当年《奇异博士》（Doctor Strange）上映，主角班尼迪甘巴贝治（Benedict Cumberbatch）竟然破天荒到港宣传，就因为卢凯恩做足功课。 “你知道明星很忙，多年来Marvel每有电影推出，香港都会申请，但始终未有成功过，直到发现奇异博士有香港场景，就以此作为申请原因。”卢凯恩表示，最终有幸邀得男神游港，但团队并无相关经验，在共同努力下，甘巴贝治的一周游表现得相当宾至如归。	2018-05-28	经济日报	要闻		446
捍卫粤语 勿陷反对派分化圈套	http://paper.hket.com/article/2083256	香港社会两极化是事出有因的，社会根本上有一班人不断找机会去分化社会和制造矛盾，从而达到自己的政治目的。 最近突然“有人”发现教育局于2013年上载了一篇题为《浅论香港普通话教育的性质与发展》，内容指香港人的母语非粤语，而母语是汉语。反对派如获至宝，马上大肆宣传，挑动社会争议。 无风起浪 反对派文革式伎俩 笔者很同意特首的说法，整件事情无论从多方面去看，也是十分无聊的。首先，事缘的那篇文章只是政府网页上众多文章中的一篇，只代表作者个人的意见，没有任何迹象证明文章的内容代表政府的立场。而且那是早在5年前的文章，何以突然被拿出来去无风起浪？反对派更上纲上线地质问政府官员，要求他们否定文章的说法，好像否则就是背叛香港人，要毁灭粤语。 这些文革式的手法其实是反对派常用的伎俩。在2012年时他们就用一个私人出版社的一本教科书的一段内容，去发酵出一个反对国民教育的运动。 往后，他们“食过返寻味”，在2…	2018-05-30	经济日报	国是港事	黄楚峰	1241
发掘粤语文化之美	http://stepaper.stheadline.com/news_content.asp?newsid=F03201.txt&newscat=F&newsdate=2018-06-05	语言是人类沟通的工具，亦是文化产物，甚至是文明的结晶。港人的母语是粤语，这种方言通行于广东，也反映了岭南文化，粤语词汇背后的意义，多于我们所想。 《粤语词汇讲义》由两位内地学者邵慧君、甘于恩合著，书中讨论粤语词汇的基本特点和内部差异，作者从文化着眼，首次提出粤语的三种类型︰省城粤语、洋化粤语、传统粤语。社会环境和风俗对语言有巨大影响，如地名、避讳、饮食，反映生活。 有些人以为粤语不及书面语高雅，作者通过当代粤语流行词汇，分析粤语古语词的变异，描述粤语与古汉语的关系。此外，粤语是接受最多外来词的方言，这跟广东、港澳特殊历史和地理环境有关，香港粤语以英语外来词最多，如曲奇、士多、啫喱等，当中有不少普通话系统已采用。 书名：《粤语词汇讲义》 作者：邵慧君、甘于恩 出版社：商务印书馆 出版日期：2018年3月 定价：$88 新书速递	2018-06-05	星岛日报	教育		457
世纪．在ER捱更抵夜的日子：1.2亿人以粤语为母语	http://premium.mingpao.com/cfm/Content_Column.cfm?Channel=vx001&Path=134806448084/vx001c.cfm	【明报文章】“你说什么？我听不懂。你说中文可以吗？”相信几乎所有前线医护人员都会遇见这个问题。 “我都系讲紧中文。”是我一般的回答，然后迎来病人迷惘的表情。 语言学家一般认为，如果两个人“鸡同鸭讲”，他们所用的语言就不可能是其中一方的方言，应为两种语言。不过语言也常有以政治原因划分的，例如丹麦人和挪威人都互相听得懂对方的话，不过由于彼此来自不同国家，所以丹麦语和挪威语就被当成两种语言。 我甚至遇过有人提议用英语沟通。病人来看医生都是想把病医好，甚少拘泥什么母语、“父语”，实事求是。不过笔者皮肤黝黑，加上戴了口罩之后，面目模糊，当然也有可能被误认为是非华裔医生。 有老一辈的医生不谙国语，要找同事来翻译。近年不少新入职的病人服务助理都是从中国大陆来的新移民，来港后才学粤语，虽然有口音，语境却非常地道，默默耕耘，与他们合作愉快。 我作为新一代的医生，“两文三语”当然难不倒我。虽然不少来自中国内…	2018-06-06	明报	作家专栏	王思启	908
乡村长大喜获接纳 流利粤语多得邻居	http://premium.mingpao.com/cfm/Content_News.cfm?Channel=gb&Path=168508126905/gga2.cfm	【明报专讯】40多年前，香港一处村落，每家每户大门都开着，任小孩奔走。“星仔，过来踢波喇。”有人扬手，朝一个黑黝黝的小孩叫嚷。那里唯独有一家不是黄皮肤，每当咖哩飘香，邻居都涌至，向“星太”问好。别人口中的星仔就是白俊达，今天他说得一口流利广东话，多亏当年邻里“不分颜色”。 爱睇欢乐今宵 爱听张国荣 为养活6个子女，白俊达的母亲到工厂当女工，父亲则又做工厂保安又在酒楼打工，归家总带来热腾腾的猪肠粉。与大多港人一样，白俊达“电视汁捞饭大”，爱看《欢乐今宵》，又爱听张国荣的歌，姊姊更常在家高唱Monica。 虽在港成长，但印度传统观念在白俊达心中并无褪色，念亲恩，也重视家庭。曾有人问他“你阿妈同你住？”，即被他指正﹕“唔系，系我同我阿妈住。”有次他与友人到安老院探访，同行有人不住落泪，因无法想像要把家人送到院舍。 成立组织义教少数族裔中文 白俊达将参加华懋集团“至爱我家”摄影及短片比赛，谈谈家…	2018-06-14	明报	港闻		582
雪地鸿爪：保育粤语伪议题	http://orientaldaily.on.cc/cnt/news/20180620/00184_005.html	近年香港兴起保育风，每逢有古宅被破坏或老店遭迫迁，总能引起怀旧情绪及要求政府保育的呼声，只是如今有人提出要保育粤语，未免小题大作甚至别有用心了。 食正粤语是否母语这条水，港台最近做了一个题目，采访部分新来港人士及学童，他们表示普通话是自己的母语，而其粤语则非常之水皮，不易融入本地社会，有人坦言不愿光顾茶餐厅，因为听不太懂地道的粤语，难沟通。节目中还访问了那位最近颇得大名的本地语言学家，强调粤语地位受威胁，要进行全面保育。 听到普通话的机会的确多了，除了每天有一百五十个内地移民配额、内地来港读书的学生以及循专才计划来港人士，还有不少内地企业在港上市，这些人多以普通话为母语。然而，尽管讲普通话的人多了，仍然改变不了香港是粤语社会的事实，根据港府最新人口统计数据，说普通话者增加了百分之二，同时有高达近九成的人口仍然是说粤语。 既然粤语是主体、强势的语言，又何须保育呢？事实上，新来港人士虽讲普通…	2018-06-20	东方日报	龙门阵	香桐仁	538
港男粤语粗口“问候”台警母亲 检方依侮辱公务员公署罪嫌起诉 22:23	http://news.mingpao.com/ins/instantnews/web_tc/article/20180724/s00004/1532441059142	台湾传媒报道，一名王姓香港男子去年6月赴台旅行，见警员向的士司机开罚单，以广东话粗口“问候”警员母亲，涉嫌妨害公务当场就逮。基隆地检署星期二（24日）侦结，决定依侮辱公务员公署罪提出起诉。 起诉书指出，王男去年6月带家人到台湾旅游一星期，由李姓的士司机提供包车服务。有日下午王家前往新北瑞芳九份观光，上山途中司机因违规靠泊巴士停车处，谢姓警员见状上前开罚单。 王男当时身处车内，一直怒目相向。谢警问他“怎么了”，王竟以广东话大骂“X你老母”。谢立即喝令王立即下车，告知他已触犯妨害公务罪，要当场逮捕。 王似乎以为对方不懂广东话，解释道：“我在说广东话，没有在骂你。”谢马上回应：“这句脏话，台湾人都听得懂！”随即上铐带王回警署侦办，留置拘留所一晚后，隔天送到基隆地检署复讯。 检察官认定，王涉嫌干犯侮辱公务员公署罪与公然侮辱罪嫌，处分1万元台币交保。近日官方调查后决定，根据刑度较重的侮辱公务员公署…	2018-07-24	明报	即时两岸		468
美青年举区旗Rap粤语唱好香港	http://124.243.200.100/a.php?f=20180731/gw-52.txt	香港有Hip Hop（嘻哈），但外国人用广东话唱Rap，仲要唱好香港，你又听过未？最近网上热传一段MV，名为《What Up HK》，由外国二人组合The Gwai Lou Show演唱。他们的广东话虽然唔咸唔淡，但胜在够诚意，又喺MV里举起香港特区区旗，引来网民热议。 两位外国歌手都有中文名，一位叫“艾正斌”、另一位叫“田诚忠”。歌词中提及他们来自美国，曾在港短住，“我哋住喺香港唔系住得好耐，所以我哋唔可以讲到好快，我哋识少少扮代表，你哋可能觉得我哋好搞笑。”他们又找来一位女声唱副歌：“香港其实，我哋非常之挂住你。香港其实，我哋非常之想返番嚟。” 网民好Buy劲畀Like 他们亦很熟悉香港的文化，MV中又饮港式纸包饮品，又玩功夫，还提到欧阳靖、KT等Hip Hop歌手，又话“香港音乐？最好系张敬轩。”不少网民都畀Like佢哋：“你哋两个真系好犀利，加油呀！”话时话，郑晴觉得，“一国两制…	2018-07-31	大公报	香港特稿		463
90后健美YouTuber 全职投身拍片盼收入增5成 拟添粤语频道吸粉丝	https://paper.hket.com/article/2139882	“个个都想做YouTuber（网络媒体创作者），难道个个都胜任吗？”要造成功的YouTuber，坐拥百万年薪，以10万起跳的订阅粉丝，的确令人趋之若鹜。不过背后亦要付出代价。90后Emi Wong，月前毅然辞去正职，全心发展YouTuber事业。她坦言，仍在适应中。 现年26岁的Emi Wong，曾以会考7A成绩，拔尖到港大环球商业系。毕业做过MT，辗转到了一间运动服装品牌，担任管理社交媒体的工作，一做就2年。其间考取健身教练牌照，年半前开设YouTube频道，拍摄以英语为主的健身、健康饮食影片，现时频道有逾2,000万浏览量，拥有超过50万粉丝订阅。 频道逾2千万浏览量 粉丝逾50万 她坦言，当初父母有为她的职业决定感到忧虑。“身边的同学，大多为专业人士，而我则选择从事数码营销的工作，父母都略感有点浪费。但我知道，这是我有兴趣的事。” 从爱上运动，到运动服装品牌工作，考取健身教练牌照、…	2018-08-17	经济日报	行政人员		1219
不是粤语“残”片﹗ 梁醒波重现大银幕	http://premium.mingpao.com/cfm/Content_News.cfm?Channel=ja&Path=202211856486/vta1.cfm	【明报专讯】无论是“担番口大雪茄咋，充生晒认经理”的小人物，还是豪气干云的黄衫客，梁醒波（波叔）在超过半个世纪的演艺生涯中，把诸多角色都他演活了。从文武生到喜剧大师，跨越粤剧舞台再到电影电视，波叔的形象成为上世纪香港社会的集体回忆。今年是梁醒波诞辰110周年，UA CineHub与香港电影资料馆合办“我们的波叔”放映节目，让观众在大银幕重温波叔的精彩演技；亦有回顾展“梁醒波．伶影之间”，展示梁醒波不同时期的演艺历程。 粤语长片常被戏称为“粤语残片”。梁醒波长孙梁智宏提起爷爷说：“他做的所有努力即是让『粤语残片』不『残』。” 影展选择《娇娇女》作为开幕影片，别有意义，波叔女儿文兰（原名梁葆文）正有份演出此剧。文兰自觉不适合演艺圈，1960年代已退出，今次因父亲纪念展，她少有地出现在公众面前。说起父亲的演艺生涯“不需要多讲，大家听到『梁醒波』3个字都会带笑容”。 听到“梁醒波”都会笑 195…	2018-08-24	明报	文化		1790
胡雪岩说粤语	http://124.243.200.100/a.php?f=20180919/xk-2.txt	胡雪岩是安徽人，在浙沪成就跌宕人生，让这位清朝大红顶说粤语的是香港话剧团，本周末，该团将在北京天桥艺术中心演出《亲爱的，胡雪岩》。 郭沫若认为历史剧重要的是挖掘内在的历史精神的真实，在历史精神的表现里注入剧作家对现实的感触与时代的思索。香港编剧潘惠森的《亲爱的，胡雪岩》不是戏说，而是写出了历史精神的艺术真实，他虚构的仆人老四为全剧讲述人，讲述了胡雪岩商海沉浮。香港文化习惯消解崇高，这出戏里老四在当代视角里跳进跳出，被消解的崇高在世俗温情中格外伟岸，让胡雪岩有一种尊严的光芒。此剧的创作者不仅热爱笔下的历史人物，又有抽离这种热爱的时代距离。 今年此剧新版导演是司徒慧焯先生，他在舞美的精巧空间演绎世界万千，有中国戏曲造型与调度，也不乏现代舞台导演语汇，不笨不拙，形式主义都在叙事抒情里，就连洒的雪花也是有淡雅的分寸感。上半场奔放炙热，上半场最后一幕定格在乱世百姓的那颗苦难的心，转折出下半场奠定的…	2018-09-19	大公报	小公园	杨劲松	686
精英驻内地口岸 全通过法律英粤语考核	http://124.243.200.100/a.php?f=20180922/zm-53.txt	【大公报讯】内地口岸区设有30条人工查验通道，相关人员是经精挑细选，才获派驻西九龙站。深圳出入境边防检查总站西九龙出入境边防检查站负责人艾锋透露，内地口岸所有单位人员均经过英语、粤语、法律法规、服务理念等培训和考核，以适应“一地两检”服务要求。 每天从深圳搭高铁来港上班 另外，为严格执行“一地两检”，内地口岸区工作人员每天需自行购票、一早乘坐高铁从深圳到西九龙站上班，其餐饮以及内地口岸区的维修维护、卫生保洁等费用，均由内地负担。 艾锋称，少量边检民警需夜间执勤，以便运营方工作人员在夜间办理出入境手续，趁“天窗期”进行夜车检修、铁道维护等工作，以确保高铁运营安全。	2018-09-22	大公报	中国		319
【官员有Say】粤语对港是优势 增普通话或更佳	http://paper.wenweipo.com/2018/10/08/ED1810080017.htm	香港落力推动两文三语，如何保持语文能力，是一个需要作专业研究课题。教育局局长杨润雄昨日接受港台节目访问时指，广东话对香港来说是优势，而古诗词歌赋用广东话读出更能带出韵味，强调香港要保留广东话等，但他亦提到，现时世界上学中文多以普通话为主，应该思考日常生活里面多用普通话去表达和学习，会否有更好帮助，长远也需要由专家研究，用广东话学中文会否让香港失去固有优势。 杨润雄受访时表明自己作为广东人以广东话为母语，但香港亦包括少数族裔及来自包括潮州等不同地方的人，难以简单地说明“香港的母语”是否广东话，有关议题“好多人可能有不同看法”，所以他过往选择形容广东话是“学校里面常用教学语言”。 杨润雄：无质疑粤教中 在语文学习方面，他提到，现时有关普通话教中文的争论点，主要在于师生普通话水平能否达到较佳水平。杨润雄强调，广东话对香港而言是优势，“诗词歌赋用广东话读出来才有韵味。” 然而他亦指，全世界来说主…	2018-10-08	文汇报	新闻透视眼		698
香港出生9岁移民 粤语流利	http://www1.hkej.com/dailynews/article/id/1960814/	翻阅陈钦淇背景，只知他在美国芝加哥长大，曾于奥巴马政府任职；原以为多数是典型土生土长的ABC（美国出生华人），才会加入政府，没想到他说得一口流利广东话，“我是香港出生，身份证有三粒星，1991年9岁才举家移民芝加哥，平日一家人也是用粤语沟通。”其妻是加籍港人，难怪陈钦淇说话腔调跟地道港人无异。 他又自言，从18岁开始，几乎每年都会返港探亲，故即使去年回流也不难适应，唯一是要习惯一些较地道用语，“有次跟港府人员开会，说了一大轮，对方突然爆了一句：『呢啲咪就系即食面囉』，我想了良久，才知『即食面』是指可立即做到的东西。” 谈到未来打算，笑说没想太多，“看公司安排，总之一直学到新事物，已经很感恩。”	2018-10-08	信报	财经新闻		324
智能语音领先 粤语也能识别	http://124.243.200.100/a.php?f=20180930/zm-34.txt	【大公报讯】记者赵臣合肥报道：在位于合肥高新区科大讯飞公司的产品展厅，其语音识别系统产品吸引了此次港媒高层参访团的多位团员上前体验。对着手机讲话，与手机相连的大屏幕就能准确无误地同步显示出字幕。该系统不仅能识别普通话，即使是地道的粤语口语也能同步显示，引起参访团一阵阵惊叹。据现场工作人员介绍，科大讯飞最新的翻译产品，支持中文与33种语言互译，中文包括粤语、四川话、东北话、河南话等方言，还能拍照翻译。 科大讯飞成立于1999年，在语音合成、语音识别、口语评测、语言翻译、声纹识别、人脸识别、自然语言处理等智能语音与人工智能核心技术上处于国际先进水平，是我国唯一以语音技术为产业化方向的“国家863计划成果产业化基地”。6年前，科大讯飞推出了全球首个语音云开放平台。至今年8月31日，讯飞开放平台赋能开发者83万，日均服务量47亿次，累计覆盖终端数19亿。科大讯飞市场部负责人介绍，基于语音云开放平…	2018-09-30	大公报	中国		478
贾樟柯的粤语歌	http://124.243.200.100/a.php?f=20181007/xk-6.txt	长期以来看电影形成了一个很私人的“评价标准”，如果一部电影，无论任何细节或原因，能够触动我的“泪点”，它自然是一部“好电影”。 记得二○一五年看贾樟柯的电影《山河故人》，叶蒨文的《珍重》第一次在女主角赵涛经营的音像店响起。尽管这首粤语怀旧曲和汾阳县城粗糙的街景，粗砺的现实，浓重的山西方言并不匹配，甚至反差强烈，但影院的音响效果渲染了背景音乐的情绪，竟让我意外有些泪目。此时电影后两段时空的故事还没有展开，但反覆响起的老歌默契地串联了主人公之间即将到来的“离别”。或者，到达异国的第一个圣诞节，巴黎寒风中徘徊无所去处后躲进“温暖”电影院熟悉的母语中，更是暗合了我意外的“触动”。 不过，这首年代感十足的流行金曲于我有些遥远，直到字幕滚动完成我才知道歌手和名字。前不久上映的电影《江湖儿女》中，山西大同的旧矿区，香烟缭绕的麻将室内，又响起了叶蒨文的歌声。还是变革时代中的情义主题，歌声依旧，触动依然。…	2018-10-07	大公报	小公园	步潇潇	687
杨润雄回应争议不认同粤语式微	http://stepaper.stheadline.com/news_content.asp?newsid=A17038.txt&newscat=A1&newsdate=2018-10-12	在昨日的《施政报告》答问会上，教育局局长杨润雄再次为广东话长远发展的争议解画，他重申，现时两文三语的教学语言政策不会有变。有电台记者引述学者意见指，若杨润雄认为广东话式微，理应去捍卫，杨否认该说法，更揶揄该名记者，“你应该听听我在你们电台上说了些甚么。加上，我不认同广东话正在式微，所以我不需要回答你的问题。” 杨润雄日前于香港电台的节目中提及，港人继续以广东话学中文，长远而言会否失去优势，引起争议；他昨日在记者会上两次被追问有关教学语言的问题，他强调，两文三语是学生需要的能力，学校仍以此政策方针为主，“到目前为止，都未有需要去改变两文三语的政策。”	2018-10-12	星岛日报	维港会		290
夫人随行大秀粤语	http://www1.hkej.com/dailynews/article/id/1974359/	文汇网报道，习近平夫人彭丽媛也同行参观广州永庆坊，在非物质遗产展览厅，彭丽媛安静走进来欣赏广绣制作，并用粤语赞“荔枝好靓喔！”正埋头工作的广绣非遗传承人黄敏健抬头一看，才发现是彭丽媛。黄敏健称彭丽媛非常温柔和蔼，还用粤语念了一遍黄敏健正在刺绣的作品名字“吉荔图”。	2018-10-25	信报	两岸消息		134
穗小学禁粤语 遭勒令整改	https://china.hket.com/article/2195442	互联网近日流传信息，指广州市广雅小学的家长近日收到校方一则短讯，表示为推广普通话，一律禁止学生在校使用方言（意指粤语）交流。 校方此举引起广州家长反弹，质疑这种做法向外推广，会导致粤语失传。有家长更向当地教育部门反映意见。荔湾区教育局回应指，接到家长的投诉后，已经与广雅小学负责人了解了相关情况，责令其进行整改，并强调“推普不废粤”。	2018-10-29	经济日报	中国		180
重振粤语片全球影响力	http://paper.wenweipo.com/2018/11/13/CH1811130008.htm	1、香港电影人文隽：从西九龙站坐到广州南站47分钟，港珠澳大桥开车从香港到珠海和澳门也只是三四十分钟，具备这些硬件，再加上去年开始的广东省政府很多政策，现在是最好的时机，我们（香港电影人）应该回来； 2、珠江电影集团董事长王垂林：共建珠江电影学院，是粤港澳大湾区电影合作的一个人才基础工程，在接下来的办学中发挥各方的优势资源，在师资配置、课程设置、实习实训等方面积极探索、大胆尝试，造就一批青年电影人才； 3、珠江电影集团党委副书记钱永红：建议三地政府建立大湾区电影产业的促进组织，三地明确有关扶持政策的同时，若在三地的合拍片给予审批的绿色通道等方面先试先行，加大三地的合作力度能加快电影的互荣共通； 4、博纳影业集团总裁于冬：借助粤港澳大湾区的优势，给香港电影的创作打造家园。珠江电影学院的诞生，实际上就是培育该片家园最重要的人才，凝聚最重要的艺术家和产业发展的合作者，打造金融中心，打造资本投资…	2018-11-13	文汇报	内地		518
美七伤连环车祸 司机只懂粤语	http://orientaldaily.on.cc/cnt/china_world/20180103/00180_027.html	【本报综合报道】美国加州三藩市一辆货车于周一下午时段，在一个十字路口撞向两辆私家车之后，再撞倒途人，事件造成至少七人受伤。 三藩市警方表示，没有迹象显示事件涉及恐怖袭击，当地传媒指这是交通意外，涉事货车司机被捕，有指他只能说广东话。 需召翻译员帮忙 事发于当地时间下午约三时半，地点是里士满区。一辆货车在一个繁忙的十字路口冲红灯及违法左转，结果失控撞向两名年老的男途人、一辆停泊的汽车及一辆载有一家五口的私家车。当局接报后，派出多辆警车及救护车到场，并向意外现场一带发出红色警报。 三藩市消防部门表示，一名受伤的途人内出血而危殆，另一名途人则肺部刺穿和肋骨断裂而重伤，至于被撞的私家车上一家只受轻伤。消防部门呼吁民众不要前往意外现场，警员则在场调查意外原因。美国广播公司报道，被捕的货车司机不谙英语，需要翻译员协助。	2018-01-03	东方日报	国际		412
何谓“粤剧中的粤语”？	http://124.243.200.100/a.php?f=20180105/tstt-15.txt	“粤文化”的形成，非一朝一夕，是经过长年累月在民间演变而成的。早年，人民生活平淡，“睇大戏”（看粤剧）就成了大部分人的重要娱乐节目。 经过岁月的洗礼，粤剧中的“术语”衍生了不少生动有趣、饶有意义的“俗语”和“歇后语”，成为“粤文化”的一部分。再者，“粤剧”本来是透过“官话”演绎的，及至上世纪二、三十年代一群粤剧的资深从业员以“粤语”这个既美丽且更具普及性的方言取代了“戏棚官话”，就此开启了“粤剧”新的一页。“粤剧”与“粤语”的关系密不可分，不言而喻。2009年，联合国教科文组织把“粤剧”列入“人类非物质文化遗产代表作名录”，“粤语”在背后的推动力可不少哩。 今季，《粤语解码》选择了以“粤剧中的粤语”为主题，所涉及的“粤语”大致分三类： 1、“多”人用，但“不明所以”，如：撞板；爆棚；顶栊；兜住；爆肚；煞科；斟介；啱线；唔咬弦；叹慢板；大龙凤；有板有眼；万能老倌／通天老倌；合晒合尺；六国大…	2018-01-05	大公报	通识头条		973
近距离交流 鼓励驻军学粤语	http://124.243.200.100/a.php?f=20180108/gw-64.txt	部分中信集团驻港企业员工代表在活动期间，与驻军官兵代表举行座谈会，近距离面对面深入交流。会上有员工代表关心官兵的粤语学习情况，又以自己普通话不标准为例，鼓励官兵大胆说和练。亦有员工代表笑言，官兵可与集团旗下的大昌行员工切磋汽车维修及机械技术。 座谈会在解放军海军钦州号护卫舰上举行，出席的官兵代表包括海军、航空兵和女子特种兵。座谈会前，钦州舰舰长亲自在甲板上向员工代表介绍军舰装备和性能，并回答提问。 座谈会以普通话进行，员工代表王明贤对驻军官兵的粤语水平表示好奇。官兵代表郭健回应说，来香港前曾专门接受粤语培训，可惜来港后因工作繁忙、未有太多时间练习，加上平时较少有机会离开军营与港人进行口语交流，因此自认水平一般。不过郭健亦指，香港市民的普通话水平日益提高，相信彼此能流畅对谈，日后自己也会找机会继续提高粤语水平。 员工代表陈棋昌则自嘲虽然普通话水平欠佳，但仍坚持一直说，鼓励官兵对粤语也要大胆…	2018-01-08	大公报	香港特稿		752
古诗词教育宜以粤语为主	http://www1.hkej.com/dailynews/article/id/1765515/	近日香港浸会大学一些学生就普通话考试与校方发生冲突，引起不少关注，网上亦重新流传曾钰成先生在2016年写的一篇专栏文章〈无法领略〉。该文以教育局颁布的高中中国语文“指定文言经典学习材料”（下称“指定材料”）中的唐诗和宋词为例，说明“由于普通话的声调跟中古汉语语音差别太大，所以用普通话诵读唐诗宋词，无法领略本来声调的味道”。 关于浸会大学的具体事件和政策，以及普通话在生活和工作中的实用角色，已有大量其他论者评述。在此，我只想探讨一个较为狭窄的——但意义也可能较为长久的——教育问题：在香港一些既有条件用粤语授课、也有条件用普通话教授中文的学校，当学习古文，尤其是古诗词时，用这两种语言教授各有什么利弊？ 散文对音韵不太讲究 我在圣保罗男女中学就读时，初中用过粤语和普通话上中文课，高中的中文课则全以粤语进行（但基于学校的语言政策，在所有其他正式场合——例如早会——讲中文时都要用普通话）。当学习现…	2018-02-09	信报	时事评论	卢安迪	2198
广东社总团拜 王志民粤语送祝福	http://paper.wenweipo.com/2018/02/24/AY1802240006.htm	何靖梁亮胜等首长出席 200乡贤聚首庆新春 香港文汇报讯（记者 李挚）金狗贺岁，喜气盈盈。香港广东社团总会昨日于会所举行戊戌年新春团拜，中联办主任王志民、副主任何靖等出席主礼，该会主席梁亮胜等首长及众乡贤友好近200人聚首喜庆新春。王志民主持祝酒，用粤语送上“恭喜发财”新春祝福，他希望总会同仁身体力行，让春天的诺言化成秋天的果实，共同为香港、为国家作出更大贡献。 酒会上，梁亮胜发表热情洋溢的新春贺辞，他表示，今年的春天对大家来说有特殊的意义，是个愿景美好的春天，是十九大顺利结束后的第一个春天，国家由繁荣走向富强，在各个方面取得巨大成就，走进了新时代，让人充满期待。香港“一国两制”行稳致远，在新的发展时期，有了新的定义、新的机遇，在新的春天里，大家对祖国、对香港的美好未来充满信心。 梁亮胜：社团领袖要升呢 他续说，这个春天也是使命光荣的春天，爱国爱港是历史赋予香港广东社团总会每一位成员的光…	2018-02-24	文汇报	社团新闻		1018
粤语长片亦教材	http://stepaper.stheadline.com/news_content.asp?newsid=H04144.txt&newscat=H&newsdate=2018-02-11	人人都说香港是填鸭式教育，学校都只重视学生的学业成绩，功课繁重，令学生喘不过气来。不过，也有些开明的校长，明白到培养学生的学习兴趣，比压逼学生死读者，能使学生学得更多、学得更活。我的好友冯立荣便是此中佼佼者。 冯立荣是圣爱德华天主教小学的校长，他推行学科半日制，上午是一般的学科课堂，午膳后学生花半小时做功课，之后便上“学艺周”，安排各式培训和游戏活动，例如今年新开游泳课，由学校出资请教练任教。 冯立荣本身是粤剧迷，也是电影迷，亦可说是香港掌故迷。他珍藏了很多旧刊物、旧唱片，更拥有二千余套粤语长片。他把课室改为“光影留声教室” （小图），俨如电影院，并于后排设置博物馆展示柜，摆放电影海报、剧本等，实施电影教学。 冯立荣之前任教东涌天主教小学时，我写了一副鹤顶格对联给他，曰：东林典句声声雅；涌澳淳风习习薰。 及至他转往圣爱德华天主教小学，我又写了一副双钩格对联给他，曰：圣言训勉彰神爱；德行修…	2018-02-11	星岛日报	马经		518
“澳门100毛”年收入8位数 观众遍布澳粤星马 “微辣”靠粤语搞笑 吸like多过人口	http://premium.mingpao.com/cfm/Content_News.cfm?Channel=gb&Path=168504795255/gcy1.cfm	【明报专讯】若形容“微辣创作”（微辣）为“澳门100毛”，容易令人理解：主打年轻人口味、拍搞笑短片、不讳粗口；两者也“笑有出头天”：“100毛”上市文件披露年收入逾9000万元、利润3600多万元；微辣年收入达8位数字，广告短片动辄7位数字起计。但若要比较，看数字，“100毛”在facebook获117万人赞好（likes），是香港730万人口的16%；微辣在facebook“吸”的likes，却比澳门61万人口再高出5万。“我们在新加坡、马来西亚以至广东省都有观众。”微辣创办人陆志豪（绰号“六毫子”）不敢自诩成功，其他人游说他“冲出澳门”之际，他却坚持：“我们若为钱放弃广东话而拍普通话短片，这事比我们自己拍的短片更可笑。” 明报记者 李以庄 玩魔术短片起家 低价接广告挣资金 如果占香港本地生产总值（GDP）约17%收入的金融业之于香港是台风，占GDP逾60%的博彩业之于澳门，理应是龙卷…	2018-02-15	明报	港闻		1392
中大学生会歌征粤语歌词 “为更有香港文化” 口语书面语不限	http://premium.mingpao.com/cfm/Content_News.cfm?Channel=gb&Path=202206696186/gzb1.cfm	【明报专讯】大学有校歌，学生会都有会歌。中大学生会嘅会歌喺1971年，由曾任翻译中心研究主任的翻译大师宋淇（笔名林以亮）填词、时任中大崇基学院音乐系系主任黄永熙作曲，以普通话唱出；中大学生会代表会就话为咗令会歌更有香港文化，决定由“广东话会歌、会章专责委员会”举行广东话会歌填词比赛，冠军有3000蚊。 比赛要求系要用粤语创作，口语书面语不限，但唔可以有粗口同淫亵用语，填词人亦可以编埋曲。评审准则系视乎音准、歌词同学生会或中大嘅关系，同埋歌词用语。冠、亚、季军分别有3000、1500同500蚊，3月30号截止。 现时中大学生会会歌词嘅第一、二部分系咁嘅：“开了山／辟了地／我们的神圣工作是拓荒／承担着整个民族的光辉／我们还要不停地光大和发扬；迎着风／对着浪／在学问的大海中向前航／吸收新知识心胸要开放／我们要做替大众铺路的桥梁。” 中大各书院中，崇基、新亚、联合嘅“校歌”都系用普通话唱，逸夫院…	2018-03-09	明报	港闻		476
办粤语会歌赛 中大生会搞撕裂	http://paper.wenweipo.com/2018/03/10/HK1803100042.htm	陈兆涛“爆响口”敌视普通话 网民：广东话也是中国语言 香港文汇报讯（记者 姬文风）大学校园近年存在少数鼓吹“港独”的滋事分子，渴望向大众展示自己与国家“划清界线”态度，却又自知不为社会所容，只敢在鸡毛蒜皮的事上借题发挥，“小学鸡”程度叫人啼笑皆非。多次纵容“港独”宣传品在校散播的中大学生会近日举办所谓“广东话会歌设计比赛”，表面鼓励学生关注“广东话传承”，但负责人就“漏口风”称普通话是“外来语言”，声言目前的普通话会歌“于理不合”。一众眼利网民随即领会该比赛“填词为名、分化为实”目的，并强调广东话也是中国一个城市的语言，奉劝学生会不要多做无聊事情。 中大学生会成立于1971年，会歌同日而立，由时任中大音乐系系主任黄永熙作曲、中大翻译研究中心主任宋淇（笔名林以亮）以普通话作词。 中大学生会会歌1971年已有 中大学生会代表会周三（7日）在facebook专页发出帖文，宣称举办“广东话会歌填…	2018-03-10	文汇报	港闻		1188
港大招BB生 研如何学粤语	http://paper.wenweipo.com/2018/03/13/ED1803130009.htm	（记者 高钰）香港大学言语及听觉科学部“言语、语言及阅读实验室”正招募0个月至12个月大、以广东话作母语的香港本地婴儿参与一项有关婴儿语音发展的学术研究。今次研究是一项涉及香港、日本、韩国、泰国的国际合作项目，旨在透过比较亚洲各地的语言，从而了解婴儿如何学习母语的语音系统，和何时分辨出其他语言和其母语。 过去二十多年的研究显示，父母和婴儿之间的互动对宝宝的语言发展担当重大的角色。这是因为初生婴儿在未学会说话前，其实已经会透过聆听去接收父母、照顾者及外界的语言知识。 虽然初生婴儿能分辨外界各种的声音，但接近8个月至10个月大的时候，他们开始建立对母语语言系统的认知，同时减低对非母语语言的敏感度。 这些研究大多集中探讨学习欧美语言的婴儿的语言发展进程。有鉴于亚洲与欧美的语言系统有显著差别，故今次研究的目标是探究以香港本地婴儿作核心的语言发展体制，以助本地父母加深对学习粤语发展进程的认知，从而…	2018-03-13	文汇报	新闻透视眼		664
着眼香港文化 中大学生会会歌征粤语歌词 12:28	http://news.mingpao.com/ins/instantnews/web_tc/article/20180308/s00001/1520474953860	中大学生会最高立法机构中大学生会代表会昨晚在facebook发文称，为令学生会会歌“更有香港嘅文化”，举办广东话会歌设计比赛，希望为现时以普通话唱出的会歌填上粤语歌词。 代表会的帖文中指出，填词比赛由《广东话会歌、会章专责委员会》负责举行，评分准则有三，包括音准、歌词与学生会或中大之关系、歌词用语；设计要求是口语及书面语皆可，但不能含有粗口及淫亵用语，参赛者更可为会歌编曲。 作品提交限期是本月30日，比赛设立冠亚季军，分别可获3000元、1500元或500元奖金。 中大学生会成立于1971年，会歌由时任中大音乐系系主任黄永熙作曲、中大翻译研究中心主任宋淇（笔名林以亮）作词，是七、八十年代毕业的中大校友大型聚会常唱的歌曲。 中大学生会会歌歌词 开了山 辟了地 我们的神圣工作是拓荒 我们的神圣工作是拓荒 承担着整个民族的光辉 我们还要不停地 我们还要不停地光大和发扬 我们还要不停地光大和发扬…	2018-03-08	明报	即时港闻		866
中大学生会会歌征粤语词 主办方：外来语普通话作会歌“于理不合” 13:12	http://news.mingpao.com/ins/instantnews/web_tc/article/20180309/s00001/1520569716106	中大学生会最高立法机构中大学生会代表会，周三（7日）晚上在Facebook公布举办“广东话会歌设计比赛”，为现时普通话版本的会歌征求粤语歌词。负责举办比赛的“广东话会歌、会章专责委员会”主席陈兆涛回覆《明报》查询时表示，以普通话这外来语言作为会歌歌词“着实于理不合”，希望藉此吸引本地同学关注广东话面临的威胁。 根据代表会在Facebook的帖文，填词比赛有3个评分准则，包括音准、歌词与学生会或中大之关系、歌词用语。作品提交限期是本月30日，比赛设冠亚季军，分别可获3000元、1500元或500元奖金。 “广东话会歌、会章专责委员会”主席陈兆涛回覆明报查询时表示，广东话作为香港人的母语，毫无疑问为香港文化核心载体；中大作为本地大学，本科生中港人占八成以上，对于以普通话此一外来语言作为会歌歌词“着实于理不合”，因此举办比赛，希望吸引本地同学关注广东话正面临威胁，同时进一步向外地生推广广东话。…	2018-03-09	明报	即时港闻		1167
老土粤语长片桥段	http://www1.hkej.com/dailynews/article/id/1790061/	日前，安格斯与长辈饮茶闲谈，她娓娓道出两个真人真事的故事，均发生在上世纪五六十年代。首个故事男主角是她的一位富家子弟远亲，大学期间情窦初开与师妹相恋，奈何两家非门当户对，所以受到家人极力反对往来。后来中途杀出另一位女同学，一直暗恋男主角，更与其他同学合谋，在庆祝会上灌醉他。富家男醒后发觉米已成炊，无可奈何地与她成亲。 婚后二人育有两名子女，一家四口表面上美满幸福。奇怪的是，已为人父的他，日间如常上班工作，黄昏返家待晚饭后，总会找藉口离家出走数小时，凌晨时分才拖着疲惫身子回家，倒头便睡。妻子心有不甘，暗中委派私家侦探调查。果然不出所料，丈夫在外包养二奶。她盛怒下大兴问罪之师，岂知正中男主角下怀，反正东窗事发，乘机提出离婚。过了不久更索性搬离住宅，与情人双宿双栖。妈妈与一对子女则留守旧居，终日以泪洗面。大家或者也料到，这位抢走丈夫的情敌，就是当年那位师妹。如今拱手相让物归原主，心里懊悔不已。…	2018-03-15	信报	理财投资	安格斯	865
看好大湾区机遇 志伟拟拍粤语片贺岁	http://paper.wenweipo.com/2018/03/22/EN1803220016.htm	成龙、曾志伟、汪明荃、刘伟强及王祖蓝5位创会会员受访，问到成立香港演艺界内地发展协进会目的？成龙表示中国电影及电视发展非常蓬勃，希望内地能够开放更多配额给香港，无论台前幕后包括灯光、摄影，亦正如曾志伟所说电视剧制作一年达到逾16,000部、电影都有八百部未计网剧，实在是太多机会。 问到是否想增加更多的配额？志伟表示配额并不是最重要：“因在内地拍戏要面对好多问题，例如如何申诉，现在内地没有香港演艺人协会的办事处，这个会就是类似的形式，不过叫做内地发展协进会，主要是帮助香港艺人往内地发展，多去了解内地的政策，又好像大湾区发展可以有助粤语的发展，所以有很多讯息是要给大家知道！”志伟又透露，老一批有成就的艺人可能已经进了内地市场，但后生的一班想入内地就业，都可以作为介绍人，更会有计划成立一些演艺学会及基金会去帮助有意愿的工作者到内地发展。志伟又提到一些内地官员来港，都需要去接待，从中可以互相交流…	2018-03-22	文汇报	娱乐头条		1114
趣说粤语	http://124.243.200.100/a.php?f=20180404/tk-12.txt	来香港之前，我生长在北方，说的是一口标准的普通话，了解最深的方言大概就是北京胡同里的那一口京片儿了，除此之外，别说粤语了，就连上海话、四川话也是一样一点儿都听不懂的。 庆幸的是，我来香港的时候年纪尚小，孩子们在一块儿，打打闹闹地语言自然也就学得快了，几年时间里，我就将粤语摸索了个七七八八，虽不能字正腔圆地发得百分百标准，但日常的沟通是没问题了。后来，日子长久了，不得不说，方言到底是有魅力的，粤语也是如此，它带着广东特有的地域性文化，散发出有趣又值得探索的韵味。 就算不了解广东文化，但凡看过港产电影的大概也都能知道，在粤语里，形容美好的东西都喜欢用个“靓”字。香港人说话，开口就称对方为“靓女”、“靓仔”。一开始听人家叫我“靓仔”，我还讪讪地笑，心想我哪里称得上“靓”啊。后来才发现，就连菜市场里泥巴兮兮的蔬菜也可以形容为“靓”，黑乎乎的鸡骨草汤也可以很“靓”。可见，至少“靓”这个词和颜色无关…	2018-04-04	大公报	大公园	王乐	1463
华空军粤语宣传片 迎合海外华人	http://china.hket.com/article/2046918	内地媒体报道，解放军空军为了向海外华人宣传军力，首推粤语版短片，介绍轰-6K和“神威大队”。 南都网昨报道，空军近日对外推出3种语言版本的短片，讲述轰-6K和神威大队的故事，除了中英文，当中包括专为海外华人制作的粤语版解说。这是大陆空军多年来的首次创新与尝试。轰- 6K是中国研发的中远端轰炸机，被称为“战神”。	2018-04-10	经济日报	中国		171
空军首推粤语宣传片	http://www1.hkej.com/dailynews/article/id/1812714/	解放军空军为了向海外华人宣传军力，近日首次推出粤语版短片，介绍远程轰炸机轰6K和轰炸兵团“神威大队”。南都网指出，这是空军多年来的首次创新与尝试。另外《航空知识》刊登轰20隐形轰炸机想像图，引发外媒关注。	2018-04-10	信报	两岸消息		104
解放军推“神威大队”四语宣传片 粤语版附繁体字幕 21:04	http://news.mingpao.com/ins/instantnews/web_tc/article/20180419/s00004/1524141461872	中共解放军空军官方微博“空军发布”，分别在上周日（8日）及本周四（19日），先后发布普通话、粤语、英文和闽南话四种版本的文宣片段，讲述“神威大队”和“战神”轰-6K轰炸机威水事迹。其中粤语版本一反中共文宣传统，罕有采用繁体字幕，相信是为了方便向大陆以外的华人推广。 短片《“神威”与“战神”相约》长约3分20秒，在开场白已明言：“大国兴衰史表明，强军是强国的标配。一个强大的国家，必定有一支能够维护国家主权安全发展利益的强大军队。” 片中介绍，“神威大队”现为解放军空军主力。2015年2月，中央军委主席习近平曾亲自视察“神威大队”所在师团，坐进轰-6K飞机驾驶舱，了解装备性能。今年3月，“神威大队”出动12架轰-6K战机，在关中腹地实战军训。 官方微博发布宣传片段的同一日，《人民日报》刊文形容“神威大队”是一支“敢打必胜、敢于亮剑、敢挑重担”的部队。	2018-04-19	明报	即时两岸		419
【粤语讲呢啲】“白鸽眼”与“狗眼看人低”	http://paper.wenweipo.com/2018/04/24/WH1804240003.htm	梁振辉 香港资深出版人 辉仔：咦，婷婷，早两日听你阿妈讲，话你出咗去玩，点解咁快就返咗嚟嘅？ 婷婷：呢排喺报馆赶紧个“笼屋1”专题，所以咪“系咁意2”上深圳“打个白鸽转3”就返嚟囉！ 辉仔：吓，估唔到今时今日仲有“笼屋”呢家嘢！ 婷婷：生活逼人又就脚，冇计喇！ 辉仔：哈，你话最初系点谂到呢种咁唔人道嘅居住方式（口架）嗱？ 婷婷：听讲系喺“逼逼狭狭4”嘅“白鸽笼5”度偷桥嘅！ 辉仔：讲返转头（口架），住响嗰度啲“笼民”已经够惨（口架）喇，听讲仲长期畀人歧视（口架）！ 婷婷：所以我喺专题度咪用咗“白鸽眼”嚟形容嗰班睇低人嘅人囉！ 辉仔：哗，识得用“白鸽眼”捞埋“白鸽笼”嚟讲，你老总肯定赞你啫！ 婷婷：我唔只话佢哋“白鸽眼”，仲会话埋佢哋“牛咁眼”（口架）噃！ 辉仔：乜嘢话，“牛咁眼”唔系话有人望住人“眼都唔眨6”嘅咩？你应该讲“狗咁眼”，“狗眼看人低”（口架）嘛！ 婷婷：好彩有你指正，唔系出…	2018-04-24	文汇报	文汇园		2297
粤语非港人母语论惹争辩 Ben Sir火都嚟狠批教育局	https://www.am730.com.hk/news/%E6%96%B0%E8%81%9E/%e7%b2%b5%e8%aa%9e%e9%9d%9e%e6%b8%af%e4%ba%ba%e6%af%8d%e8%aa%9e%e8%ab%96%e6%83%b9%e7%88%ad%e8%be%af-ben-sir%e7%81%ab%e9%83%bd%e5%9a%9f%e7%8b%a0%e6%89%b9%e6%95%99%e8%82%b2%e5%b1%80-124829	教育局小学中文教学资源网页、载有中大普通话教育研究及发展中心专业顾问宋欣桥(小图)撰写的一篇文章，内容提到“粤语并非港人母语”，日前在网上广传，即惹热议；而至昨日，人称“Ben Sir”、研究粤语文化多年的中大中文系前高级讲师欧阳伟豪博士，批评教育局“引述权威”未够准确，质疑政府有意矮化及压抑粤语。教育局则回应指，本港小学主要以粤语教学，可见政府在教学语言上的立场。 该篇题为《浅论香港普通话教育的性质与发展》的文章，是教育局小学中文课程配套资料中，《集思广益(四辑)：普通话学与教经验分享》的其中一篇文章，文章论述母语应是民族的共通语言，而粤语虽是汉语的一种，但仅属方言，并不可成为母语，故港人的母语应为普通话。“粤语属于汉语，但通常我们不会用粤语——一种汉语方言来代表汉民族的语言。明确地说，一种语言中的方言不能视为『母语』。因此，把『粤语』称作『母语』，不是严格意义上『母语』的含义。因为『…	2018-05-03	am730	新闻		1609
内地学者：汉语是港人母语 Ben Sir怒斥矮化粤语	http://www.singpao.com.hk/index.php?fi=news1&id=68977	教育局在小学中文网上教学资源页面上载来自内地的中文大学普通话教育研究及发展中心荣誉专业顾问宋欣桥一篇文章，指出粤语只是一种方言，在严格意义上并非香港人的“母语”，而应是目前称为普通话的汉语，有关文章引起争议，人称Ben Sir的中文大学中文系前高级讲师欧阳伟豪即在社交平台facebook上载视频，直斥教育局引用一名从未研究过粤语的内地学者指出粤语并非香港人的母语，不但是引用权威不精准，更质疑教育局是刻意矮或压抑粤语。 本报港闻部报道 宋欣桥这篇文章指出，联合国教科文组织就把“母语”称为“本族语”，即母语是属于民族的，而汉民族共同使用的语言就是汉语，但粤语属于汉语，但属地域变体的方言，所以不是严格意义上“母语”之义，香港汉民族的母语乃是汉语，汉语早已形成了汉民族的共同语，而汉语共同语口语的以前叫“官话”，后来叫“国语”，现在内地称作“普通话”。 指职衔上引用权威未够精准 不过，这篇文章激起…	2018-05-03	成报	要闻港闻		1405
什么是母语？ 林郑：无聊问题杨润雄：粤语	http://premium.mingpao.com/cfm/Content_News.cfm?Channel=gb&Path=202208650086/gca2.cfm	【明报专讯】教育局被揭于网上教学资源页面有一篇学者文章，提及粤语不符“母语”之义，引发争论。特首林郑月娥昨早在立法会答问大会，形容有人在教育界“无风起浪”，将一份文件内的两三句“放大”。对于目前教学语言政策会否改变，她强调此刻没有计划，但指“世事会变”，无法“一生一世承诺一些事情”。被问母语是什么，林太没回应，只称这是“无聊问题”；教育局长杨润雄则在电台节目说其母语是粤语。 林郑：语言政策此刻没计划 另外，学校课程检讨专责小组会讨论通识科发展方向，有报道指检讨方向包括剔出核心科目或只修不考等。林太昨强调，小组“还未开始有任何看法”，惟“大家又在担心猜忌”、“无的放矢”，甚至有人说背后有政治黑手，她指香港应向前走，不应争议不休。 对于母语文章争议，林太指该文件是2013年文章，而教学语言是普通话还是广东话，政府会尊重校本管理，“我们每日都在说广东话，所以这个根本不是问题……但有人要炒作，我…	2018-05-04	明报	港闻		964
批粤语及通识科争议“无风起浪”	http://www1.hkej.com/dailynews/article/id/1834859/	多位泛民议员在行政长官答问会上，就教育局网页一篇学者文章提及“粤语非母语”观点质询特首林郑月娥。林郑表示，教育界近日有关粤语及通识科考核的争议都是“无风起浪”，强调政府目前无计划改变教学语言政策，亦尊重校本决定用广东话或普通话教授中文，“我们日日都讲紧广东话，所以这根本不是问题，It's a non-issue。” 社福界议员邵家臻要求林郑回答她的母语是什么。林郑回应，她上任后已指出很多教育问题迫切，亦提出教育应该回归教育，“过去一段时间很多政治问题入侵校园，所以我相信近日点解有人要无风起浪，就是觉得教育界太过平静。” 不答何种母语 指问题无聊 林郑强调，教育局局长已解释过，有关文章在2013年已存在，是一系列文章其中一篇的两三句，无必要把它放大。邵家臻其后再追问林郑的母语是什么，林郑说：“对唔住，我唔答啲咁无聊嘅问题。” 教育界议员叶建源及会计界梁继昌之后亦要求林郑就两文三语政策清晰表…	2018-05-04	信报	政坛脉搏		897
林郑批粤语争议 无风起浪政治炒作	http://paper.hket.com/article/2065681	对于教育界中有关粤语的争议，特首林郑月娥批评，过去一段时间很多政治问题入侵校园，亦有人无风起浪，她上任后特别关心教育界，认为教育要回归教育。 立法会教育界议员叶建源昨日在特首答问大会上问及，近日一篇关于粤语的旧文章，引起社会回响，希望林郑能回应，政府有否打算贬抑粤语的地位，及改变目前两文三语的语言政策。林郑回应时强调：“无”，又指本届政府会集中做八大范畴教育事项的研究、检讨、更新及改正，并无任何教学语言的问题。 指通识考核 无的放矢 林郑又表示，留意到近日教育界又无风起浪，当中涉及粤语是否母语的问题，另一个则是通识是否继续考核的问题。她指，教育局局长已就两个议题清晰解说，认为粤语的问题是源于2013年的一份文件，而教学时采用书面语或粤语，政府会尊重校本的决定，强调“这根本不是问题，但有人要炒作，我们惟有不断解说。” 至于通识科问题，林郑形容是无的放矢，又指自己受教育界所托，成立由专家领导…	2018-05-04	经济日报	政治		516
张晓明：港毋须争论粤语是否母语	http://paper.wenweipo.com/2018/05/05/YO1805050009.htm	（记者 郑治祖）反对派近日又挑起“粤语是否母语”的争论。国务院港澳办主任张晓明昨日回应指，不应该争论这个问题。至于主张“结束一党专政”者能否参选立法会议员，张晓明认为十二届全国人大法律委员会原主任委员乔晓阳已经说过。 乔晓阳日前在澳门出席宪法基本法专题报告会时，指出主张“结束一党专政”的人不可能当特首。港澳办原主任王光亚则曾表示，喊“结束一党专政”应该不可参选立法会。 中联办主任王志民早前强调，内地现行制度是“中国共产党领导的多党合作和政治协商制度”，“一党专政”是伪命题而非事实，大家不应被这个伪命题牵着走，又认为试图改变内地共产党领导的社会主义制度，是人为地伤感情的事情。	2018-05-05	文汇报	本报要闻		318
【网上热话】教育局派普通话课程配套资料 有篇章称粤语只是方言不是母语 18:00	http://news.mingpao.com/ins/instantnews/web_tc/article/20180501/s00001/1525166632846	“普教中”推行近10年，有教育界和政界中人力撑，也有人质疑成效，亦引伸本地粤普之争。最近有网民留意到，教育局曾向全港小学派发多份普通话课程配套资料中，有篇章强调“香港汉族人的母语是汉语”，粤语只属“地域变体”，普通话才是“正规的语言教育”。 教育局由1997年起至今，向全港小学派发共11套小学普通话课程配套资料，供教师选用。《集思广益（四辑）：普通话学与教经验分享》一书，2013年起列入名单。局方在书籍介绍中表示，当中25篇文章具参考价值，阐述本地和内地学者，对本港普通话教学的思考与探索。 其中一文题为〈浅论香港普通话教育的性质与发展〉，由中文大学普通话教育研究及发展中心荣誉专业顾问宋欣桥撰写。文首指出，普通话教学之所以有争议，是因为对“母语”、“中文”、“普通话”、“粤语”等概念缺乏准确理解：“这个问题对普通民众来说似乎不必深究，但对教育工作者，特别是从事中国语文的同仁来说则需要予以厘…	2018-05-01	明报	即时港闻		1083
【粤语非母语？】Ben Sir质疑矮化粤语 斥教局引内地学者替代港学者 12:39	http://news.mingpao.com/ins/instantnews/web_tc/article/20180502/s00001/1525234230588	教育局在小学中文网上教学资源页面，上载了中大普通话教育研究及发展中心荣誉专业顾问宋欣桥文章，称粤语只是汉语其中一种方言，属“地域变体”，不是严格意义上“母语”之义。中大中文系前高级讲师欧阳伟豪(Ben Sir)今早在facebook发布影片，批评教育局引用一位没有粤语研究的内地学者之文章，替代粤语研究丰硕的香港学者，属“引用权威未够精准”。他认为，当局一系列的行为，反映背后有矮化粤语，或压抑粤语的强烈动机。 欧阳伟豪指，翻查中大网页后发现，宋欣桥的研究著作全部关于普通话，没有一篇研究粤语，直言“教育局点解够胆死去引用佢观点？”他举例指，香港有许多研究粤语为母语的学者，由大学中文系、语言学系、教育学院的学者，以至教育局课程发展处的中文组同事，质疑当局为何不引用粤语研究丰硕的香港学者。 另外，欧阳伟豪指宋欣桥没有博士学衔，其职衔则为荣誉专业顾问，形容全港持博士学衔的教授及讲师多的是，认为教育…	2018-05-02	明报	即时港闻		668
【粤语非母语？】杨润雄：让教师看不同学者意见 指小学教育可知教学语言立场 13:00	http://news.mingpao.com/ins/instantnews/web_tc/article/20180502/s00001/1525236762093	教育局在小学中文网上教学资源页面，上载了中大普通话教育研究及发展中心荣誉专业顾问宋欣桥文章，称粤语只是汉语其中一种方言，不是严格意义上“母语”之义，引起热论。教育局长杨润雄表示，文件旨在让老师或界别人士，看社会不同学者对“母语”看法，强调从小学教育以广东话为主，便可清楚教学语言上政府立场。 杨润雄中午回应时指，有关文件并非最近上载，形容这一系列文件，“提供予老师或界别人士，去看社会不同学者或不同人士意见，对母语的看法”。 问到政府对“母语”立场，杨润雄以小学教育为例，称“大部分都是以广东话为主，可清楚见到教学语言上政府立场”。	2018-05-02	明报	即时港闻		294
教局网页载学者文章指“粤语非母语” 杨润雄：旨在供老师看不同意见	http://www.stheadline.com/inews-content.php?cat=a&nid=100123	教育局网页小学中文教学资源页面中的一篇学者文章，当中提到粤语非母语，因“香港人的母语是汉语”，粤语只属方言，不是“严格意义上母语之义”，而普通话就是汉语的标准语言。有网民近日转载文章，随即掀起争议。 中大中文系前高级讲师欧阳伟豪（Ben Sir）今早在facebook发布影片，炮轰教育局引用权威失准，并质疑当局目的是压抑粤语，强调“粤语系我哋嘅母语”。教育局局长杨润雄回应指，文件旨在提供予老师或界别人士，去看社会不同学者对母语的看法，并强调小学教育“大部分都是以广东话为主”，已可清楚见到教学语言上政府立场。 该文章题为《浅论香港普通话教育的性质与发展》，是教育局小学中文课程配套资料《集思广益（四辑）：普通话学与教经验分享》其中一篇文章，由中大普通话教育研究及发展中心荣誉专业顾问宋欣桥所写。 文章一开首指出本港普通话教学引起争议，是因为对“母语”、“中文”、“普通话”、“粤语”等概念缺乏准…	2018-05-02	头条日报	即时港闻		793
【粤语非母语?】Ben Sir拍片怒轰教局引用失准压抑粤语 13:46	http://std.stheadline.com/instant/articles/detail/705556-%E9%A6%99%E6%B8%AF-%E3%80%90%E7%B2%B5%E8%AA%9E%E9%9D%9E%E6%AF%8D%E8%AA%9E%3F%E3%80%91Ben+Sir%E6%8B%8D%E7%89%87%E6%80%92%E8%BD%9F%E6%95%99%E5%B1%80%E5%BC%95%E7%94%A8%E5%A4%B1%E6%BA%96+%E5%A3%93%E6%8	教育局网页上载中大普通话教育研究学者文章，指出粤语只属方言，并非“严格意义上母语之义”，因而引起争议。中大中文系前高级讲师欧阳伟豪（Ben Sir）亦炮轰教育局引用权威失准，质疑当局目的是压抑粤语。 欧阳伟豪今早在facebook上载影片，批评教育局竟引用一位没有粤语研究的内地学者之文章，替代粤语研究丰硕的香港学者，是引用权威失准。他说，翻查中大网页后发现，文章作者宋欣桥的研究著作全部关于普通话，没有一篇是研究粤语，“一位没有研究粤语的学者，竟然指出粤语不是香港人的母语”，直斥“教育局点解够胆死去引用佢观点？”他续说，香港有许多研究粤语为母语的学者，来自各大学中文系、语言学系、教育学院，而且教育局课程发展处中文组同事亦有很多。 此外，欧阳伟豪亦指宋欣桥没有博士学衔，职衔只为荣誉专业顾问，强调全港大学持博士学衔的教授及讲师多的是，再次质疑教育局在引用权威上欠精准。 欧阳伟豪又谓，教育局网页…	2018-05-02	星岛日报	即时香港		671
教局网页载学者文章指“粤语非母语”杨润雄：旨在供老师看不同意见 13:15	http://std.stheadline.com/instant/articles/detail/705529-%E9%A6%99%E6%B8%AF-%E6%95%99%E5%B1%80%E7%B6%B2%E9%A0%81%E8%BC%89%E5%AD%B8%E8%80%85%E6%96%87%E7%AB%A0%E6%8C%87%E3%80%8C%E7%B2%B5%E8%AA%9E%E9%9D%9E%E6%AF%8D%E8%AA%9E%E3%80%8D+%E6%A5%8A%E6%BD%A4%E9%9B	教育局网页小学中文教学资源页面中的一篇学者文章，当中提到粤语非母语，因“香港人的母语是汉语”，粤语只属方言，不是“严格意义上母语之义”，而普通话就是汉语的标准语言。有网民近日转载文章，随即掀起争议。 中大中文系前高级讲师欧阳伟豪（Ben Sir）今早在facebook发布影片，炮轰教育局引用权威失准，并质疑当局目的是压抑粤语，强调“粤语系我哋嘅母语”。教育局局长杨润雄回应指，文件旨在提供予老师或界别人士，去看社会不同学者对母语的看法，并强调小学教育“大部分都是以广东话为主”，已可清楚见到教学语言上政府立场。 该文章题为《浅论香港普通话教育的性质与发展》，是教育局小学中文课程配套资料《集思广益（四辑）：普通话学与教经验分享》其中一篇文章，由中大普通话教育研究及发展中心荣誉专业顾问宋欣桥所写。 文章一开首指出本港普通话教学引起争议，是因为对“母语”、“中文”、“普通话”、“粤语”等概念缺乏准…	2018-05-02	星岛日报	即时香港		793
【粤语非母语?】Ben Sir拍片怒轰教局引用失准 压抑粤语	http://www.stheadline.com/inews-content.php?cat=a&nid=100153	教育局网页上载中大普通话教育研究学者文章，指出粤语只属方言，并非“严格意义上母语之义”，因而引起争议。中大中文系前高级讲师欧阳伟豪（Ben Sir）亦炮轰教育局引用权威失准，质疑当局目的是压抑粤语。 欧阳伟豪今早在facebook上载影片，批评教育局竟引用一位没有粤语研究的内地学者之文章，替代粤语研究丰硕的香港学者，是引用权威失准。他说，翻查中大网页后发现，文章作者宋欣桥的研究著作全部关于普通话，没有一篇是研究粤语，“一位没有研究粤语的学者，竟然指出粤语不是香港人的母语”，直斥“教育局点解够胆死去引用佢观点？”他续说，香港有许多研究粤语为母语的学者，来自各大学中文系、语言学系、教育学院，而且教育局课程发展处中文组同事亦有很多。 此外，欧阳伟豪亦指宋欣桥没有博士学衔，职衔只为荣誉专业顾问，强调全港大学持博士学衔的教授及讲师多的是，再次质疑教育局在引用权威上欠精准。 欧阳伟豪又谓，教育局网页…	2018-05-02	头条日报	即时港闻		671
教育局教学资源网指“粤语非母语” Ben Sir质疑矮化粤语 14:25	https://topick.hket.com/article/2064203	教育局在小学中文网上教学资源网页上载文章惹网民争议，文章指，粤语只是汉语的其中一种方言，严格意义并非“母语”。教育局局长杨润雄今日(2日)回应指，上载有关文件旨在让老师及界别人士了解各种看法，强调小学教育仍以广东话为主，已可清楚见到政府在教学语言上的立场。 教育局早前在小学中文网上教学资源网上载由中大普通话教育研究及发展中心荣誉专业顾问宋欣桥的文章，题为《浅论香港普通话教育的性质与发展》，内容提及“香港汉族人的母语是汉语”，粤语只属“地域变体”，故普通话才是“正规的语言教育”。不过，有学者随即反驳指，根据一般语言学定义，父母所说语言就是“母语”，故粤语即本港大部分人的“母语”。 中大中文系前高级讲师欧阳伟豪(Ben Sir)今日(2日)早上亦在facebook专页发布影片，批评教育局引用一位无粤语研究的内地学者文章，属“引用权威未够精准”，又质疑当局一系列行为，“以法庭用语来说，显示背后…	2018-05-02	经济日报	即时社会		1262
【粤语非母语?】Ben Sir拍片怒轰教局引用权威失准压抑粤语 13:46	http://std.stheadline.com/instant/articles/detail/705556-%E9%A6%99%E6%B8%AF-%E3%80%90%E7%B2%B5%E8%AA%9E%E9%9D%9E%E6%AF%8D%E8%AA%9E%3F%E3%80%91Ben+Sir%E6%8B%8D%E7%89%87%E6%80%92%E8%BD%9F%E6%95%99%E5%B1%80%E5%BC%95%E7%94%A8%E6%AC%8A%E5%A8%81%E5%A4%B1%E6%BA	教育局网页上载中大普通话教育研究学者文章，指出粤语只属方言，并非“严格意义上母语之义”，因而引起争议。中大中文系前高级讲师欧阳伟豪（Ben Sir）亦炮轰教育局引用权威失准，质疑当局目的是压抑粤语。 欧阳伟豪今早在facebook上载影片，批评教育局竟引用一位没有粤语研究的内地学者之文章，替代粤语研究丰硕的香港学者，是引用权威失准。他说，翻查中大网页后发现，文章作者宋欣桥的研究著作全部关于普通话，没有一篇是研究粤语，“一位没有研究粤语的学者，竟然指出粤语不是香港人的母语”，直斥“教育局点解够胆死去引用佢观点？”他续说，香港有许多研究粤语为母语的学者，来自各大学中文系、语言学系、教育学院，而且教育局课程发展处中文组同事亦有很多。 此外，欧阳伟豪亦指宋欣桥没有博士学衔，职衔只为荣誉专业顾问，强调全港大学持博士学衔的教授及讲师多的是，再次质疑教育局在引用权威上欠精准。 欧阳伟豪又谓，教育局网页…	2018-05-02	星岛日报	即时香港		671
教育局引文章指粤语非母语 Ben Sir拍片轰 (15:55)	http://m.on.cc/nc/hknews/20180502/20180502155521lc.html	【on.cc东网专讯】咩事搞到Ben Sir发晒火？事缘有网民发现，教育局网站上载了一篇学者文章，直指粤语“不是严格意义上母语的含义”，引发讨论。曾在中大中文系任职高级讲师的欧阳伟豪（Ben Sir）遂将该学者“起底”，并有重大发现！ Ben Sir在个人Facebook帐户上载一条自拍短片，他开宗明义称，拍片目的并非针对撰文的中大普通话教育研究及发展中心荣誉专业顾问宋欣桥，而是“针对教育局引用权威失准及其背后的动机”。 他指，翻查中大网站发现，宋欣桥是位内地学者，所有的研究及著作都是关于普通话，并无一篇研究粤语，直斥教育局“咁劲够胆死去引用佢嘅观点出嚟”，又反问“香港冇研究粤语嘅学者咩？” Ben Sir续称，宋欣桥无博士学位，只担任中大的荣誉专业顾问，惟本港“既有博士且职衔是恒常教员的教授讲师多的是”，不解教育局为何“弃用香港权威”。 教育局数年前曾于网页写上“粤语不是官方语言”，其…	2018-05-02	东方日报	即时港闻		617
【粤语非母语？】学者文章掀热议 中大普教研中心：宋先生为人低调 不会亲身回应 17:25	http://news.mingpao.com/ins/instantnews/web_tc/article/20180502/s00001/1525250325875	教育局在小学中文网上教学资源页面，上载中大普通话教育研究及发展中心荣誉专业顾问宋欣桥一篇文，称粤语只是汉语其中一种方言，不是严格意义上“母语”之义，引起热议。普教研中心回覆，宋先生为人低调，相信不会亲身回应，但强调当日他撰文时只属学术性质，社会各界以至政府各部门会否采信当中观点，视乎各人如何解读。 文章引起广泛讨论后，记者尝试过不同渠道接触宋欣桥，各机构均称爱莫能助。唯独去电中大普教研中心，有较详细回应。电话另一头表示：“宋老师篇文系想探讨汉语等概念嘅定义，系单纯学术讨论，都唔系近期写(口架)喇。”文章近日突然引起公众关注，职员也感意外。 中心强调成立以来从没任何政治立场，一切发表均属学术性质：“每个人睇学术文章，都会有唔同解读，可以同意，当然都可以唔同意。”职员说，宋先在已在文中清楚交代个人看法，其他人不应单凭片言只字下定论，“希望大家一字一句咁睇晒成篇文”。至于教育局为何会采用、社会…	2018-05-02	明报	即时港闻		836
【粤语非母语？】指粤语仅方言 教联黄均瑜：母语教学不对 应是中文教学 09:50	http://news.mingpao.com/ins/instantnews/web_tc/article/20180503/s00001/1525310303319	教育局在网上教学资源页面上载一篇学者文章，文中称粤语不符“母语”之义，只是方言，引发争论。教联会会长黄均瑜亦形容粤语只是“方言”，直指“一开始都说（香港）母语教学是不对”，应是“中文教学”。 黄均瑜早上在商台节目表示，“广东人来说，粤语当然是母语，但香港不止指广东人架嘛”。他解释说，“粤语”是“广府话”，是广州附近地方方言，“如果广州附近地方，（粤语）就是母语，但你潮州人，母语就是潮州话，我们香港还有百多万福建人，母语就是福建话……所以一开始都说，（香港）母语教学是不对的，是否福建人来，我就要以福建话教呢？应该是中文教学，便用中文去教囉”。 黄均瑜又说，香港方言就是用粤语，“这只是方言，方言广东省还可以的，但去到全国，那你这个就不通……要看到定位及作用”。 教协组织部主任田方泽则说“粤语当然是母语”，而香港教育大多数学生能用流利广东话，“社会近几十年都习惯用粤语，教学应倾重这语言”。他表…	2018-05-03	明报	即时港闻		504
【特首答问会】林郑称无打算贬抑粤语 惟世事会变 12:29	http://news.mingpao.com/ins/instantnews/web_tc/article/20180503/s00001/1525320507129	有网民近日发现教育局年前在网上教学资源页面上载一篇学者文章，称粤语不是严格意义上“母语”之义，引起讨论。特首林郑月娥今席出立法会答问会，被问及政府有否打算贬抑粤语的地位，林太先以一字回应“无”，其后再补充指世事会变，故无法一生一世地承诺，重申事件是“无风起浪”。 教育界议员叶建源提问时指出，政府有否打算贬抑粤语的地位，或改变“两文三语”政策。林郑月娥先直截了当地说“无”，数秒后再补充说“这一刻无”，形容世事会变，所以无法一生一世地承诺。 叶建源再追问即使要改变，是否只会加强广东话地位和学习其他语言，林郑月娥称本届政府已与业界持份者商讨，并整理出八大范畴，政府只会集中处理有关事项，而当中没有教学语言部分。	2018-05-03	明报	即时港闻		333
【粤语非母语？】前局长王永平质疑教育局做法 吁勿制造社会矛盾 13:15	http://news.mingpao.com/ins/instantnews/web_tc/article/20180503/s00001/1525323432063	网民近日发现教育局数年前于网上教学资源页面上载一篇学者文章，文中称粤语不符“母语”之义，只是方言，引起争议。曾任教育统筹局长的王永平质疑教育局为何要刊登这篇文章。 王永平于facebook表示，他20年前任教育统筹局长时，负责推行母语教学，当时虽然有人反对，但无人质疑香港母语不是粤语，“今天教育局为什么要刊登这篇认为香港母语不是粤语的文章，而作者却不是知名的香港学者，也不是有国际地位的母语专家？” 王永平强调，特区政府有责任执行《基本法》， 确保港人生活方式不变，包括学习及使用粤语，“不要有意无意令一国两制变形走样，制造多个社会矛盾！” 特首林郑月娥今早于立法会回应议员质询时，批评事件是“教育界无风起浪”，又指“教育界有很多问题需要处理”。她说，“教育要回归教育”，“那份文件是2013年，一系列文件里面两三句，（把它）放大来说……教学里中文口语用广东话还是普通话，尊重校本管理，我们现在日…	2018-05-03	明报	即时港闻		609
【粤语非母语？】杨润雄承认自己母语是粤语 19:40	http://news.mingpao.com/ins/instantnews/web_tc/article/20180503/s00001/1525347189614	教育局在网上教学资源页面上载一篇学者文章，文中称粤语不符港人“母语”之义，只是方言，引发争论。教育局长杨润雄今日傍晚接受港台节目访问时，就承认自己的母语是粤语。 杨润雄表示：“如果在香港问大家的母语是什么，我想这答案大家都是知道，无须多讲的。不过既然引起那么多社会讨论，为免日后麻烦，如果你今日问我母语是什么的话，我都会直接答你就是粤语。” 他续指，至现时为止，香港常用的沟通语言，仍是以粤语为主，因此如今校园中，大部分仍然是粤语作教学语言，呼吁人们无须太紧张。 被问及教育局在今次风波上政治敏感度是否不足，杨润雄表示，其实页面内还有20多篇文章，这些文章均罗列了不同观点，呼吁人们应该全面审视。他又强调，有关文章并非教学材料，而是给教师专业分享资料，当中个别篇章亦有提及，“大部分香港人母语是粤语”一观点。	2018-05-03	明报	即时港闻		395
【粤语非母语？】统计处两报告列明 广州话是一种母语 22:38	http://news.mingpao.com/ins/instantnews/web_tc/article/20180503/s00001/1525357840367	粤语是否港人母语，近日社会一片热议，当中港府取态最受关注。《明报》翻查多份政府部门资料，发现自1997年7月1日以来，政府统计处一共发表过两次“本港语言使用情况”统计结果，两次皆列明广州话、普通话与其他中国方言等，同样属于一种“母语”。 统计处在2013年及2016年，先后发表“主题性住户调查”51号及59号报告书，均有关注“香港语言使用情况”。根据第51号报告书，全港有90.3%人母语是广东话，普通话与其他中国方言分别占3.2%及3%。数年后处方再有发表时，三者数字稍有变化，分别为88.1%、3.9%及3.7%。 林郑月娥星期四（3日）出席立法会答问会时，形容近日“母语争议”是有人无风起浪。有议员问特首母语是什么，林太坦言“唔会答咁无聊嘅问题”。教育局长杨润雄傍晚接受电台节目访问，则承认自己的母语就是粤语：“为免日后麻烦，如果你今日问我母语是什么的话，我都会直接答你就是粤语。”	2018-05-03	明报	即时港闻		423
粤语是港人生活方式重要的一环	http://premium.mingpao.com/cfm/Content_Column.cfm?Channel=vy019&Path=101104345083/vy019.cfm	【明报文章】上周，香港社会突然掀起一场母语风波，事缘教育局网页上载了一篇学者文章，指粤语只属地域变体的“方言”而非“母语”，普通话才是“正规的语言教育”。及后，特首林郑月娥在上周四出席行政长官答问会回应议员质询时，声称有关争议根本是“无风起浪”、“炒作”。后来，有议员要求她清晰表明两文三语政策是否改变，她指：“在这一刻是无，但当然世事是会变的。” 特首与官员的回应，清楚反映出他们根本不明白为何事件竟会惹起社会强烈反弹，只因扼杀方言、地方文化是中共的惯用伎俩，八年前广州市民便曾因市政府“推普废粤”的措施，发起撑广州话集会，港人亦曾在港大力声援。因此，在这话题上稍有风吹草动，港人就会担心中共暗地里把“推普废粤”的措施伸延至特区。 然而，根据《联合声明》及《基本法》，特区原有生活方式五十年不变，而粤语作为香港法定语言，当然是港人生活方式重要的一环，故起码在二○四七年前都不能改变。 此外，今次母…	2018-05-08	明报	作家专栏	李柱铭	553
员工专栏作者谈努力学粤语	http://paper.wenweipo.com/2018/04/29/HK1804290003.htm	（记者 林浩贤）香港中联办自一月起开设“员工专栏”，希望藉刊登员工的署名文章，让公众了解中联办员工在港的工作及生活感受。昨日有阅毕专栏文章的市民表示，文章内容充实，希望藉参观活动与文章作者交流。曾发表署名文章的员工则回应指，很高兴与参观的市民交流，相信彼此能建立良好关系，共同建设美好香港。 王瑞光：信访工作为港人排忧解难 在中联办社工部工作的王瑞光曾在中联办“员工专栏”撰写《一信一电总关情》为题的文章，文中主要围绕她的信访工作。王瑞光昨日在接受香港文汇报记者访问时表示，信访工作是中联办履行“反映香港居民对内地的意见及建议”职责的重要方式，因此中联办必须积极与市民沟通。 她强调，中联办为了与港人建立更深厚的关系，已在网站推出多项交流活动，而是次开放日更成功拉近彼此的距离，“很多市民主动与我们交流，反应非常好。”她还说，希望下一次的开放日能让更多市民“了解中联办、走进中联办”。 每年，中联办…	2018-04-29	文汇报	港闻		1283
【粤语讲呢啲】落狗屎．饿狗抢屎．狗改不了吃屎	http://paper.wenweipo.com/2018/05/01/WH1805010003.htm	梁振辉 香港资深出版人 辉仔：婷婷，返到公司未？ 婷婷：啱啱先返到咋！ 辉仔：大雨就系大雨咗啲，但你住得好近咋噃！ 婷婷：激鬼气！天文台明明话成个礼拜净系密云、间中有小雨，点知返公司嘅半路中途就倒水咁倒；睇下部手机，原来已经系“黄雨”；我坐架巴士死咗火，咪搞成咁囉！咁你又点呀？ 辉仔：话就话“黄雨”，真系同“黑雨”冇分别，唔系点会好似“落狗屎”咁（口架）！我都系返到公司“无耐1”咋，不过我竟然系第一个返到去喎！ 婷婷：天文台点搞（口架），“甩辘2”成咁！ 辉仔：天气嘅嘢，点“话得埋3”，咪似你哋女人啲心态，好难捉摸嘅！ 婷婷：辉仔，一有机会就“入位4”，算点先！ 辉仔：喂喂喂，下个星期连续三日假，为为话约埋你同男友去番个广州东莞三日两夜嘅超豪美食团，有冇兴趣？有就而家我报名，好快爆（口架）！ 婷婷：No喇，睇番上次，班团友食自助餐嗰阵，好似啱啱放监出嚟咁，真系“失礼九族5”呀！ 辉仔：唔…	2018-05-01	文汇报	文汇园		2484
教局网站载中大学者文章 指粤语非“母语”	http://premium.mingpao.com/cfm/Content_News.cfm?Channel=gb&Path=134805753364/ghc1.cfm	【明报专讯】“普教中”推行10年，虽没有明显证据普教中能促进中文学习，但教育局于2016年的文件表明“会继续以普教中为远程目标”。有网民发现教育局年前在小学中文的网上教学资源页面，上载了一篇学者文章，文章指粤语并非“母语”，香港人的母语应为汉话，而普通话就是汉语的标准语言。港大中文教育研究中心总监谢锡金则指出，按一般语言学定义，父母所说的语言便是“母语”，而粤语是一种母语。 该文章题为〈浅论香港普通话教育的性质与发展〉是由中大普通话教育研究及发展中心荣誉专业顾问宋欣桥所写，载于教育局网页的教学资源中，除〈浅〉外，其余文章均是分享普教中的经验及应注意事项。本报曾向教育局查询，为何把文章上载至教学资源页，是否同意有关文章观点等，当局至截稿前没有回覆。 指方言不能视为母语 而是“母言” 文章一开首便写到“对『母语』的再认识”，引述内地大学出版的书籍，指母语是民族语，不仅属于个人，而粤语是一种方…	2018-05-02	明报	港闻		849
Ben Sir狠批教育局引用无相关研究内地学者论粤语	https://www.am730.com.hk/news/%E6%96%B0%E8%81%9E/ben-sir%e7%8b%a0%e6%89%b9%e6%95%99%e8%82%b2%e5%b1%80%e5%bc%95%e7%94%a8%e7%84%a1%e7%9b%b8%e9%97%9c%e7%a0%94%e7%a9%b6%e5%85%a7%e5%9c%b0%e5%ad%b8%e8%80%85%e8%ab%96%e7%b2%b5%e8%aa%9e-124748	教育局小学中文网上教学资源页面中，有一篇由中大普通话教育研究及发展中心荣誉专业顾问宋欣桥所撰写的文章《浅论香港普通话教育的性质与发展》，内容强调“香港汉族人的母语是汉语”，粤语只属“地域变体”，普通话才是“正规的语言教育”，引起网民讨论。 Ben Sir欧阳伟豪于社交网站发布短片，狠批教育局以一名内地以普通话者作、没有研究粤语的学者，替代粤语研究丰硕的香港学者，去为粤语是否母语作解说，而作者亦没有博士学衔，职衔是荣誉专业顾问，认为引用权威未够精准。他又提及数年前，教育局网页写了一句“粤语不是官方语言”，随后删除句子。认为这一系列的持续行为，质疑动机“不是矮化粤语，就是压抑粤语”。 Ben Sir又引述2017年国务院办公厅的文件提及，“我们要『大力推广和规范使用国家通用语言文字，保护传承方言文化』”，但和谐气氛给教育局“破坏了，分化了”，反问如何保护传承香港粤语的文化，及爱国爱港。	2018-05-02	am730	新闻		424
学者称粤语非母语 教局：提供不同看法	http://www1.hkej.com/dailynews/article/id/1833826/	就教育局网页小学中文教学资源页面所载的一篇学者文章，提到粤语并非港人母语的观点，教育局局长杨润雄回应称，该篇文章早于2013年上载，是一系列文章的其中一篇，旨在为老师和业界提供不同学者和人士对母语的看法。 杨润雄表示，可能有人最近在网上看到文章才提出一些问题，强调政府对于“母语”的问题，循本地小学的教学除了英文科外，大部分科目均以广东话授课，“可清楚看到教学语言上，政府的立场。”教育界立法会议员叶建源说，教育局过去都有出版文集，但文章是否代表教育局立场，需要局方澄清。 此外，叶建源就有中学历史课本“中国收回香港主权”等用字，被评审小组评为“措词不恰当”，质询政府有关理据，以及为何不公开小组成员名单。杨润雄以书面回覆表明，课本评审程序及内容必须保密，而教育局及评审小组均不宜、也不会建议教科书有特定的表述方式。	2018-05-03	信报	政坛脉搏		386
【粤语非母语？】林郑斥教育界无风起浪 叶建源：“风”来自教育局 10:02	http://news.mingpao.com/ins/instantnews/web_tc/article/20180504/s00001/1525399331905	有网民近日发现教育局年前在网上教学资源页面上载一篇学者文章，文中称粤语只是方言，不符“母语”之义。特首林郑月娥昨早于立法会批评“教育界无风起浪”、“无的放矢”，教育界立法会议员叶建源今日于港台回应，称“风”乃来自教育局网页，局方亦并非首次引起关于母语的争议。 叶建源指，希望当局能表明有关说法只属个别人士意见，不代表政府立场，以让市民安心，林太亦应清楚地表明政府对教学语言和“两文三语”的立场，增加公众信任。 至于日前有报道称，教育局初步已首肯，就推行了9年的通识教育科作出改变，叶建源据了解称，有关专责小组仍未开始商讨，不知消息是从何来。他认为，假如报道属实，为何当局会在未咨询业界前，便有此意向。	2018-05-04	明报	即时港闻		328
教局“粤语非母语”论惹议 团体请愿撑粤语 (11:05)	http://m.on.cc/nc/hknews/20180504/20180504110550lc.html	【on.cc东网专讯】近日母语一事引起社会争论，教育局局长杨润雄今(4日)到大角咀一间中学出席活动，团体香港众志一行10多人到现场请愿，杨润雄下车期间，请愿人士高举“捍卫母语、撑广东话”等字句，数名请愿人士跟随杨进入会场。 杨润雄进入会场后，再回到学校后门与香港众志请愿人士会面约15分钟。杨重申，无打算改变两文三语政策，对于通识考核亦无想法，相关传媒近日报道的并不完全是教育局立场。至于早前引起风波的高中历史科审批一事，杨指，审批小组有教育局同事、专科老师等，局方不会给指定意见。 香港众志批评，审批小组以保障私隐理由，不向公众公开小组名单，属黑箱作业，又要求杨润雄回应未来会否再就教科书审批提供修改指引。杨回应指，小组为保障公平性而不公开小组名单，令出版商或作者无法知道小组成员，而局方未来会按需要再作出指引，“有需要就出，无需要就唔出”。	2018-05-04	东方日报	即时港闻		400
张晓明:香港不应争论粤语是否母语 13:12	http://192.168.0.5/hkejjs/2018-05-04/1835205.html	香港近日争论粤语是否母语，港澳办主任张晓明表示，不应该争论这问题，但未有解释为何不应争论。 对于表示「结束一党专政」的人士能否参选立法会议员的提问，张晓明称，十二届全国人大法律委员会主任委员乔晓阳已经说过。	2018-05-04	信报	即时时事脉搏		118
昨承认自己母语为粤语 杨润雄：答案浅而易见 吁毋须追问讨论 14:49	http://news.mingpao.com/ins/instantnews/web_tc/article/20180504/s00001/1525415911880	教育局长杨润雄今日到中学出席活动后，再就近日的母语及修订通识科争议解画。他重申，政府立场一直是使用“两文三语”政策，现时小学仍以广东话为主。至于昨日傍晚于港台承认自己的母语是粤语，他指，是因为社会不断追问一个无需作深入讨论的问题，故“即管说一次给大家听”，认为答案浅而易见，不希望外界再作争拗。 杨润雄连日来被追问自己的母语是甚么，他直言在本港大部分人均以广东话沟通的环境下，是“几无聊的问题”，并且非常浅而易见，故没有必要追问和再作深入讨论。 在教科书评审小组的组成方面，他称，制度上有需要为成员的身分保密，以致他们在评审过程能达至公平和不受压力，相信未来没有需要再作改变。他续指，公众亦可购置课本，监察内容有否偏颇。 对于修订通识科，杨润雄表示，教育局没有要求需检视个别项目，学校课程检讨专责小组有自主性和弹性检视各个课程，并只会对课程的大方向提出建议。至于如何改变，仍然会交由课程发展议会跟进。	2018-05-04	明报	即时港闻		441
驻军防暴演练 粤语高喊：后果自负	http://orientaldaily.on.cc/cnt/news/20190802/00176_011.html	反修订《逃犯条例》风波争议持续未平，香港近两个月来多次出现大型游行皆演变成冲突收场。解放军驻港部队前日（7月31日）在社交网站发布新宣传片介绍部队工作，当中画面包括军事及防暴演练，最特别是有驻港部队人员以广东话高叫“后果自负”，而且有人员在行动演练中举起红旗，要求停止冲击。外交部昨日回应宣传片时表示，支持香港特区政府严惩暴力犯罪分子。 宣传短片 强调维护一国两制 驻港部队的宣传短片长约三分钟，内容分为反恐、维稳、防卫及同心，而在包括反恐演练的片段当中，不乏香港本地元素。驻港部队发贴指出，部队是国家主权的主要体现，是维护一国两制的重要力量，是维护香港繁荣稳定的重要基石。 有关反恐演练的片段内容，显示部队人员从直升机游绳而下，到模拟城市民居的场地执行任务；在部队人员持枪巡视时，镜头拍到一辆废弃新界的士，画面其后展示出能调校角度的枪枝，让人员可准备攻击敌方，在确认情况后开枪出击，其中一名人员在…	2019-08-02	东方日报	港闻		846
驻军防暴宣传片 粤语喊“后果自负”	http://www1.hkej.com/dailynews/article/id/2208154/%E9%A7%90%E8%BB%8D%E9%98%B2%E6%9A%B4%E5%AE%A3%E5%82%B3%E7%89%87+%E7%B2%B5%E8%AA%9E%E5%96%8A%E3%80%8C%E5%BE%8C%E6%9E%9C%E8%87%AA%E8%B2%A0%E3%80%8D	解放军驻港部队前晚发布新宣传片，有章节以维稳为主题，展示部队驱散示威群众的防暴演练画面，包括有队员出示红旗警告、发射催泪弹和水炮，及以广东话大喊“后果自负”等。中国外交部昨回应有关新影片时表示，相信解放军驻港部队将继续成为香港繁荣稳定的“定海神针”。 新影片于周三晚上在解放军驻香港部队的官方微博发放，全长约3分钟，分为反恐、维稳、防卫、同心共四个章节。片段中出现有持枪军人走近貌似新界的士的画面；亦有出动装甲车、水炮等应付示威者的场面。片尾有巿民受访称，解放军可与港人打成一片，又有小朋友说作为中国人非常骄傲。 外交部例行记者会上，有人问到驻港部队发布新影片，是否代表军方进一步维稳的态度。外交部发言人华春莹说，中央政府的立场是一贯和清晰，中央坚决支持林郑月娥行政长官带领特区政府依法施政，坚决支持警方严正执法，坚决支持特区政府有关部门和司法机构依法惩治暴力犯罪分子，坚决支持爱港爱国人士捍卫法治…	2019-08-02	信报	政坛脉搏		665
邪不压正!央视发布超燃粤语混剪：香港阿Sir，14亿同胞撑你	http://www.hkcd.com/content/2019-08/13/content_1151909.html	【香港商报网讯】近段时间以来，香港警方表现出来的勇敢、忠诚、守纪令国人感佩, 在面对暴徒野蛮攻击时, 在诽谤、挑衅和谩骂声中, 在一些反对派政客颠倒黑白的诋毁中，他们毫不退缩, 坚守岗位，维持社会治安秩序，坚持专业精神，维护法治尊严。邪终归不能压正!阿Sir，14亿同胞撑你!	2019-08-13 00:00:00	香港商报	最新报道		141
【武警练兵】深圳武警练兵片段曝光 举红旗粤语警告：停止暴力回头是岸 11:03	https://topick.hket.com/article/2429471	香港反修例风波仍然持续，路透社、法新社等外媒日前亦发现大批武警正在深圳进行集结训练。内地网上昨日（17日）亦流传一段片段，当中显示大批武警持盾及警棍，甚至利用水炮车驱散“示威者”的训练场景，有武警其间亦一度以粤语警告指：“停止暴力，回头是岸”。 ▲ 片段中有武警高举红旗，并以粤语警告指：“停止暴力，回头是岸”。（图片来源：微博） 片段长约1分钟，开场就展示大批武警及装甲车整齐列队，其后有武警队伍高举红旗，并以粤语警告指：“停止暴力，回头是岸”。片段中段则展示武警各项训练的场景，当中包括武警演练盾牌阵推进的情况、以水炮车驱散“示威者”的场面以及出动警犬把“示威者”制服的画面。 《人民日报》亦有在微博上转载相关片段，并指这是“今日（17日）在深圳举行的公安武警大练兵”。而《环球时报》总编胡锡进早前亦曾发文指，武警在深圳集结是要对香港暴力分子的“严正警告”，如果香港的暴力分子不懂得物极必反的道…	2019-08-18	经济日报	即时休闲		640
【着数Guide】《粤语好声音》港澳赛区	http://paper.wenweipo.com/2019/08/21/OT1908210009.htm	今年，由广东广播电视台珠江频道、音乐之声联合主办，星海科技集团及格雷特国际娱乐协办的“ 2019《粤语好声音》港澳赛区”已于早前完成海选，并将于今个星期日（8月25日）晚上7时在柴湾青年广场Y综艺馆举行决赛。比赛目的是表现港澳青年朝气勃勃、积极奋发的一面及多彩多姿的文化生活，并以大胆创新、独特个性、炽热气氛，传承和发扬粤语歌曲文化。香港及澳门赛区将总共选出5至10位胜出者直接进入于广州举办的 2019《粤语好声音》全球总决赛，争夺总冠军宝座。雨文 查询︰www.lightuptechgroup.com/zh/singcantonese2019 送礼 港澳赛区主办单位特别为香港文汇报读者送出“《粤语好声音》港澳赛区”门票两张，名额共5位。如有兴趣的读者，请剪下文汇报印花，贴于信封背面，连同HK$2邮资回邮信封，邮寄至香港仔田湾海旁道7号兴伟中心3楼副刊时尚版收，封面请注明“索取《粤语好声音…	2019-08-21	文汇报	副刊		446
【反修例】831前夕 武警深圳演练粤语叫人“撤退”（有片） 12:02	https://china.hket.com/article/2440573	香港“831”（8月31日即本周六）可能再出现民众集结、反对《逃犯条例》修订前夕，武警和公安再在深圳举行防暴联合练兵，其间以粤语喊话，要求模拟示威者撤退，又举起带有繁体字警告标语的旗帜，对港警示意味浓。 举繁体字警告标语 官媒《人民日报》昨晚（29日）在微博上载一段约1分钟的短片，显示大批武警公安当日在深圳又一次进行防暴演习。文字指有头戴黄色安全帽、手持雨伞、木棍以及火烧手推车的模拟示威者不断冲击部队，大批身穿全副装备的武警和公安组成方阵应对，以粤语喊话要求示威人员撤退，并出动水炮车驱赶，最终成功处置暴力骚乱事件。 此外，从片中可见，防暴演练期间，武警和公安曾用激光照射“示威者”，并两度举旗警告，其中一面蓝旗上印有“即将清场，请迅速撤离”的繁体字，下面还配有英文翻译；另外一面红旗上印上“停止冲击，否则动用武力”，同样是繁体字和英文结合，与香港警察的警告旗帜十分相似。 国防部：武警演习是例…	2019-08-30	经济日报	即时国情动向		893
人与岁月\粤语的生命力\凡 心	http://www.takungpao.com.hk/culture/237141/2019/0902/343905.html	最近，因教育局某项考试政策的修订，坊间引发了一个话题：香港教育是否要取消粤语了？“粤语”的提法在学术上不够严谨。他们想讨论的其实是：是否要取消广州话？ 这只是一个伪命题。提出此议的人也明知这事不会发生，但经一番包装和计算后郑重推出，使之成为一个社会话题。在纷乱的今天香港，或者是另有目的。 不同的语言各有魅力，且不可替代。不推广普通话，十四亿人口各操自己的方言上阵，是如何一个混乱局面，是如何一个费时失事！旧居两名看更对话要用普通话，因为一个操闽东方言，一个操闽南方言，虽都是福建大同乡，不用普通话结果就是“鸡同鸭讲”。同样道理，香港人若有点“走出去”志气的，不学普通话，过了广东省界便也寸步难行。 我们日常用的粤语即广州话，会因推广普通话而亡吗？国家语言政策制定层面、内地语言学家、也包括香港语言学家在这问题上已喋喋多年：推广普通话和使用方言不对立，方言不会消亡。只是有的人选择了听不见。 七八十…	2019-09-02 00:00:00	大公报	艺文		687
人与岁月\粤语四字词\凡 心	http://www.takungpao.com.hk/culture/237141/2019/0904/344885.html	说话、写文章都常用到四字词。有人以为四字词便是成语，其实不然。一些被认定的“成语”，仅是由四字组成的四字词。 成语也多由四字组成，但都有古典书籍出处，每个成语背后都有一个故事和意义，使用成语时宜对该故事有一点了解。电视上有一名饮食业老者讲到茶楼的倒闭效应，说现在人人都“杯弓蛇影”。“杯弓蛇影”故事说某人在酒杯里看到有小蛇游动，喝下去后很不舒服而生病。后得知小蛇是墙上一把挂弓的倒影，病立刻就好了。 这成语是说凡事不可疑神疑鬼，要问个究竟，找出原因。老者可能想说倒闭有连锁效应，会引起其他人的疑虑担忧。此处用此成语显然是用错了。 香港的文字与汉语同文同源，所用成语与普通话完全相同，二者可以相通，除了上面举的“杯弓蛇影”一例，守株待兔、掩耳盗铃、叶公好龙、一鼓作气等成语，普通话和粤语的理解和用法都相同。但口语四字词只是一种表达习惯，未必有典故，使用也有较大差异。普通话形容人长得黑，说“黑不溜秋”…	2019-09-04 00:00:00	大公报	艺文		744
饶宗颐文化馆赏“粤”与巨月兔细味昔日情粤语卡教正写旧纸本掀回忆	http://stepaper.stheadline.com/news_content.asp?newsid=F01184.txt&newscat=F&newsdate=2019-09-10	今个星期五就是中秋节，传统上，中国人都会跟家人共聚赏月，寓意人月两团圆，然而，今年中秋节除了赏月外，还有另类选择。Elsie知道，在本周五至周日的下午至晚上，在美孚的饶宗颐文化馆将举行“『粤光宝盒』中秋市集嘉年华暨饶宗颐文化馆开放日2019”，届时除了有一系列跟中秋有关的节目，包括手作市集、工艺及亲子工作坊、巨型月兔及月亮装置、寻兔迷踪有奖游戏及游戏区外，还有两个以“粤语”及“旧时光”为主题的展览，既可让市民认识博大精深的粤语文化，又可缅怀昔日的香港情怀。 Elsie跟活动负责人邓思茵（K）倾过，她说饶宗颐文化馆每年都有庆祝中秋节的活动，适逢今年中秋节正值周五，连同周末两日假期，所以决定一连三日举办中秋节活动，跟市民共度佳节之余，又可参观和认识该馆的百年历史建筑。说到两个专题展，包括“粤光宝盒”粤语展览及“纸里时光——旧时X旧纸本”展览的缘起，原来都颇有趣。 夜光字卡全“兔”露 “最初大…	2019-09-10	星岛日报	教育		1792
香港音乐剧《恋爱轻飘飘》西安首演 经典粤语金曲演绎“港味”浪漫爱情	http://news.wenweipo.com/2019/09/11/IN1909110020.htm	《恋爱轻飘飘》以轻松的手法把一段寻寻觅觅、平凡而窝心的都市爱情故事娓娓道来。（记者李阳波摄） 【文汇网讯】（香港文汇网记者 李阳波 西安报道）“是否很惊讶讲不出说话，没错我是说你想分手吗……”9月8日晚，伴随着《好心分手》、《遥远的她》、《情人知己》等一首首耳熟能详的粤语流行歌曲在西安都市之门千人大剧院响起，由香港音乐剧旗舰剧团“演戏家族”倾情奉献的音乐剧《恋爱轻飘飘》，不仅在古城西安上演了一场深情甜蜜、“港味”十足的浪漫爱情故事，同时全粤语演出和贴近香港普通市民生活的场景布置，也勾起了现场很多西安观众关于香港熟悉而美好的记忆。据悉，本场演出不仅是《恋爱轻飘飘》首次来到内地西部城市演出，同时作为第六届丝绸之路国际艺术节国际现代艺术周中国香港展演剧目，演员精彩的“港味”演绎也给很多首次欣赏香港音乐剧的“一带一路”国家和地区艺术家，留下了深刻的影响。 以轻松的手法演绎都市爱情故事 据介绍，《…	2019-09-11	文汇报	即时新闻		2016
【修例风波】政法委吁港青向北望勿困死“正宗粤语”小圈子 16:00	http://std.stheadline.com/instant/articles/detail/1091285/%E5%8D%B3%E6%99%82-%E9%A6%99%E6%B8%AF-%E4%BF%AE%E4%BE%8B%E9%A2%A8%E6%B3%A2-%E6%94%BF%E6%B3%95%E5%A7%94%E7%B1%B2%E6%B8%AF%E9%9D%92%E5%90%91%E5%8C%97%E6%9C%9B-%E5%8B%BF%E5%9B%B0%E6%AD%BB-%E6%AD%A3%E	中央政法委在微信公众号，连续两日就香港情况发表文章。今次文章针对香港青年，指出西方帮忙迎来“民主、自由”的地方，“无一不是一片焦土”，香港青年应“向北望去”，不要再困死在只说“正宗粤语”的小圈子，表示“出路其实就在家里”。 文章承认香港生活艰辛，香港年轻人“从小到大竞争激烈”，出现“就业难、工资低、房价高，蚁居陋室，出路渺茫”的情况，但这些情绪容易被利用。文章反问，现在三个月内怂恿著大家上街的人，是否就能解决香港就业、工资、房价等等一系列问题。 文章指出，香港年轻人要找出路，别把自己封闭在“香港本土人”环境，别把自己困死在只说“正宗粤语”的小圈子，而是要向北望去，而内地能为香港年轻人提供的不仅是普通的就业职位，还有更多创业和创新的机遇，包括960多万平方公里的辽阔纵深，14亿人收入不断增长的消费市场，“即便把全港11万青年全部算上，也不过是一年新增就业的零头而已”。文章引述，曾有香港年轻…	2019-09-14	星岛日报	即时香港		481
【消闲Guide】港澳代表今周六出赛 传承发扬粤语歌文化	http://paper.wenweipo.com/2019/09/18/OT1909180006.htm	早前，由广东广播电视台珠江频道、音乐之声联合主办，以及星海科技集团及格雷特国际娱乐协办的“2019《粤语好声音》港澳赛区”已于香港举行了决赛，选出了多名胜出者直接进入于本周六在广州举办的2019《粤语好声音》全球总决赛。 就港澳赛区海选方面，星海科技行政总裁张继成透露，他们特别设计了应用程式予参赛者自行拍片录歌及上载，结果收到了过千条影片，参赛者尚算踊跃。而旨在推广青年文化交流的香港亚洲青年协会亦支持这项比赛，其副会长吴家华及常务副会长黄裕成均表示，他们都希望藉着这次比赛，能表现港澳青年朝气勃勃、积极奋发的一面，以及多彩多姿的文化生活，并以大胆创新、独特个性、炽热气氛，传承和发扬粤语歌曲的文化。雨文	2019-09-18	文汇报	副刊		310
【恒大清思】粤语有历史 词汇亦古雅	http://paper.wenweipo.com/2019/09/20/ED1909200030.htm	粤语是汉语一支重要的方言，全球使用人口超过一亿，通行地区遍及广东、广西、香港、澳门，以至欧美、东南亚等海外国家。与此同时，粤语的历史源远流长，早在先秦时期已经形成，可谓历久不衰。 对于粤语的源流，不少粤语爱好者往往将焦点放在语音之上。例如不少人强调粤语声调多样，有不少继承古音的地方。然而除了语音以外，粤语在词汇方面，也同样“古雅”。不少粤语常用词汇，早见于古代典籍、字书、诗词等。只是大家习用已久，才没有察觉它们古老的渊源。例如粤语把翅膀称作“翼”，其实早见于《周易》。以“卒之”表示副词终于，则见于《孟子》。而以动词“畀”表示给予的意思，于《尚书》已有用例。 顺带一提，粤语“畀”与“俾”读音虽然相同，但其中意思、用法并不一样。据《尔雅》解释：“俾，使也。”意即“俾”带有“使”的意思。例如书信常有“俾便”一词，意思与“以便”相近。又如以下例句：“唔好俾小明离开”，其中“俾”字指不能“让”小明…	2019-09-20	文汇报	文江学海		929
粤语片拍拖地 叹脆皮龙虾	http://premium.mingpao.com/cfm/Content_News.cfm?Channel=ja&Path=101156529243/vga1.cfm	【明报专讯】青山依旧，物是人非。 屹立青山湾畔的容龙今年已经80岁，时光荏苒，人面转了又转，可幸其招牌海鲜菜式，几十年来水准如一。咬一口经典脆皮芝士焗龙虾，吃进心头的还有上世纪那幢欧式别墅带来的美好时光。 上世纪初，交通不便，从九龙市区入新界，舟车劳顿，动辄花上数句钟。直至1910年代开通青山公路，成为当时往返新界西及九龙的必经之路。整条公路沿海边蜿蜒而行，以“咪”（mile，英里）为单位，湛蓝海湾及凉快海风令人心旷神怡。早年不少富商在附近置业兴建别墅、酒店，其中陆海通公司的陈氏家族正是青山公路19咪半的容龙别墅的主人。 谢贤邓寄尘常来度假 1939年建成的容龙别墅背靠九径山，面向青山湾。原先是一座招待富有人家而设的疗养居所，后来渐变成酒店、餐厅。陈家陆海通第四代陈颂勋说：“当年爷爷嫲嫲就住在2楼，父亲及叔伯5兄弟就住在地下，一人一间房，从露台走出去就是茶座。”容龙今年踏入80周年，总厨…	2019-09-24	明报	饮食		2436
大湾区之声：史上首次粤语直播国庆盛典	http://paper.wenweipo.com/2019/09/29/CN1909290013.htm	中央广播电视总台粤港澳大湾区之声将进行史上首次粤语直播国庆盛典，届时广播与新媒体平台将同步直播展现。 ■文/图：“大湾区之声”微信公号	2019-09-29	文汇报	中国专题		69
大湾区之声:史上首次粤语直播国庆盛典	http://news.wenweipo.com/2019/09/29/IN1909290003.htm	《大湾区之声》视频 【文汇网讯】据大湾区之声官方消息，为庆祝新中国成立70周年,大湾区之声广播史上首次进行粤语直播国庆盛典，由知名粤语主播、资深编辑、专业技术组成直播团队，展现国庆盛典精彩现场。除粤语直播活动盛典外，新媒体平台还精心制作图文音视频专题展现。 责任编辑：林犀	2019-09-29	文汇报	即时新闻		148
史上首次粤语直播盛典：大湾区之声国庆团队准备好了！	http://www.takungpao.com.hk/hongkong/video/2019/0929/355111.html	直播预告片 史上首次用粤语直播国庆盛典， 中央广播电视总台粤港澳大湾区之声为您精彩呈现。 大湾区之声广播与新媒体平台同步直播报道。 粤语直播国庆盛典 由知名粤语主播、资深编辑、专业技术组成的直播团队 将为您展现国庆盛典精彩现场 大湾区之声 FM101.2 AM1215 邀请您一起 聆听祖国的美好 感受祖国的强大 新媒体精品盛宴 为了庆祝新中国成立70周年， 大湾区之声除粤语直播活动盛典外， 新媒体平台还精心制作图文音视频专题展现。 大湾区之声国庆直播团队已经整装待发! 国庆，大湾区之声，约吗?	2019-09-29 00:00:00	大公报	视频		336
大湾区之声用粤语直播国家勋章和荣誉称号颁授仪式	http://www.hkcd.com/content/2019-09/30/content_1158611.html	【香港商报网讯】中华人民共和国国家勋章和国家荣誉称号颁授仪式29日上午在北京人民大会堂金色大厅隆重举行。中共中央总书记、国家主席、中央军委主席习近平向国家勋章和国家荣誉称号获得者颁授勋章奖章并发表重要讲话。值得一提的是，中央广播电视总台“粤港澳大湾区之声”用粤语对仪式进行全程直播。 习近平强调，崇尚英雄才会产生英雄，争做英雄才能英雄辈出。英雄模范们用行动再次证明，伟大出自平凡，平凡造就伟大。只要有坚定的理想信念、不懈的奋斗精神，脚踏实地把每件平凡的事做好，一切平凡的人都可以获得不平凡的人生，一切平凡的工作都可以创造不平凡的成就。 习近平强调，一切伟大成就都是接续奋斗的结果，一切伟大事业都需要在继往开来中推进。新时代必将是大有可为的时代。全党全国各族人民要像英雄模范那样坚守、像英雄模范那样奋斗，共同谱写新时代人民共和国的壮丽凯歌。 9时58分，伴著欢快的乐曲，习近平同国家勋章和国家荣誉称号…	2019-09-30 00:00:00	香港商报	最新报道		1423
大湾区之声用粤语直播国家勋章和荣誉称号颁授仪式	http://news.wenweipo.com/2019/09/30/IN1909300034.htm	大湾区之声用粤语直播国家勋章和荣誉称号颁授仪式。 据大湾区之声官方微信消息，中华人民共和国国家勋章和国家荣誉称号颁授仪式29日上午在北京人民大会堂金色大厅隆重举行。中共中央总书记、国家主席、中央军委主席习近平向国家勋章和国家荣誉称号获得者颁授勋章奖章并发表重要讲话。值得一提的是，中央广播电视总台“粤港澳大湾区之声”用粤语对仪式进行全程直播。 习近平强调，崇尚英雄才会产生英雄，争做英雄才能英雄辈出。英雄模范们用行动再次证明，伟大出自平凡，平凡造就伟大。只要有坚定的理想信念、不懈的奋斗精神，脚踏实地把每件平凡的事做好，一切平凡的人都可以获得不平凡的人生，一切平凡的工作都可以创造不平凡的成就。 习近平强调，一切伟大成就都是接续奋斗的结果，一切伟大事业都需要在继往开来中推进。新时代必将是大有可为的时代。全党全国各族人民要像英雄模范那样坚守、像英雄模范那样奋斗，共同谱写新时代人民共和国的壮丽凯歌。…	2019-09-30	文汇报	即时新闻		1917
大湾区之声用粤语直播 国家勋章和荣誉称号颁授仪式	http://www.takungpao.com.hk/hongkong/text/2019/0930/355623.html	中华人民共和国国家勋章和国家荣誉称号颁授仪式29日上午在北京人民大会堂金色大厅隆重举行。中共中央总书记、国家主席、中央军委主席习近平向国家勋章和国家荣誉称号获得者颁授勋章奖章并发表重要讲话。值得一提的是，中央广播电视总台“粤港澳大湾区之声”用粤语对仪式进行全程直播。 习近平强调，崇尚英雄才会产生英雄，争做英雄才能英雄辈出。英雄模范们用行动再次证明，伟大出自平凡，平凡造就伟大。只要有坚定的理想信念、不懈的奋斗精神，脚踏实地把每件平凡的事做好，一切平凡的人都可以获得不平凡的人生，一切平凡的工作都可以创造不平凡的成就。 习近平强调，一切伟大成就都是接续奋斗的结果，一切伟大事业都需要在继往开来中推进。新时代必将是大有可为的时代。全党全国各族人民要像英雄模范那样坚守、像英雄模范那样奋斗，共同谱写新时代人民共和国的壮丽凯歌。 中共中央政治局常委李克强、栗战书、汪洋、赵乐际、韩正，国家副主席王岐山出席…	2019-09-30 00:00:00	大公报	文章		728
4K粤语版国庆70周年盛典大片发布 将在粤港澳大湾区院线上映	http://www.hkcd.com/content/2019-10/02/content_1158832.html	发布会现场 摄影：廖江衡 张博斐 4K粤语版国庆70周年盛典大片，国庆期间将在粤港澳大湾区的院线上映。 由中央广播电视总台央视频出品，央视频和总台大湾区之声联合推出的《此时此刻——国庆70周年盛典》4K直播粤语版电影，今天(2日)下午发布。 中宣部副部长、中央广播电视总台台长慎海雄，香港中联办副主任杨健等出席发布会。广东的华美星美影城等20多家影院，香港百老汇院线、MCL院线、英皇院线以及澳门永乐戏院等共80多家影院，都将于近期上线这部4K直播电影。	2019-10-02	香港商报	即时新闻		252
4K粤语版国庆70周年盛典大片发布 将在粤港澳大湾区院线上映	http://news.wenweipo.com/2019/10/02/IN1910020025.htm	发布会现场。央视网 【文汇网讯】据央视网报道，4K粤语版国庆70周年盛典大片，国庆期间将在粤港澳大湾区的院线上映。 由中央广播电视总台央视频出品，央视频和总台大湾区之声联合推出的《此时此刻——国庆70周年盛典》4K直播粤语版电影，今天(2日)下午发布。 中宣部副部长、中央广播电视总台台长慎海雄，香港中联办副主任杨健等出席发布会。广东的华美星美影城等20多家影院，香港百老汇院线、MCL院线、英皇院线以及澳门永乐戏院等共80多家影院，都将于近期上线这部4K直播电影。 责任编辑：之袁	2019-10-02	文汇报	即时新闻		263
4K粤语版国庆70周年盛典大片发布 将在粤港澳大湾区院线上映	http://www.takungpao.com.hk/hongkong/text/2019/1002/356879.html	发布会现场 摄影：廖江衡 张博斐 4K粤语版国庆70周年盛典大片，国庆期间将在粤港澳大湾区的院线上映。 由中央广播电视总台央视频出品，央视频和总台大湾区之声联合推出的《此时此刻——国庆70周年盛典》4K直播粤语版电影，今天（2日）下午发布。 中宣部副部长、中央广播电视总台台长慎海雄，香港中联办副主任杨健等出席发布会。广东的华美星美影城等20多家影院，香港百老汇院线、MCL院线、英皇院线以及澳门永乐戏院等共80多家影院，都将于近期上线这部4K直播电影。	2019-10-02 00:00:00	大公报	文章		244
4K粤语版国庆70周年盛典大片发布 将在粤港澳大湾区院线上映	http://www.hkcd.com/content/2019-10/02/content_1158832.html	发布会现场 摄影：廖江衡 张博斐 4K粤语版国庆70周年盛典大片，国庆期间将在粤港澳大湾区的院线上映。 由中央广播电视总台央视频出品，央视频和总台大湾区之声联合推出的《此时此刻——国庆70周年盛典》4K直播粤语版电影，今天(2日)下午发布。 中宣部副部长、中央广播电视总台台长慎海雄，香港中联办副主任杨健等出席发布会。广东的华美星美影城等20多家影院，香港百老汇院线、MCL院线、英皇院线以及澳门永乐戏院等共80多家影院，都将于近期上线这部4K直播电影。	2019-10-02 00:00:00	香港商报	最新报道		244
4K粤语版国庆盛典大片将在大湾区首映	http://news.wenweipo.com/2019/10/02/IN1910020031.htm	【文汇网讯】据央视新闻客户端报道，由中央广播电视总台央视频出品、央视频和总台大湾区之声联合推出的《此时此刻——国庆70周年盛典》4K直播粤语版电影，国庆期间登陆粤港澳大湾区影院。大湾区观众可望在影院身临其境般重温新中国成立70周年庆典的震撼场面。 10月2日下午，中央广播电视总台、中央人民政府驻香港特别行政区联络办公室与国家电影局，联合在京举办《此时此刻——国庆70周年盛典》4K直播粤语版电影发布会。中宣部副部长、中央广播电视总台台长慎海雄，中央人民政府驻香港特别行政区联络办公室副主任杨健，国家电影局副局长李国奇等出席发布会并启动上线。这是继十月一日总台4K超高清国庆直播信号进入全国70家影院后，4K“直播大片”再次登陆院线。粤港澳大湾区内的首批80余家影院有望率先播映。 发布会上，中央广播电视总台央视副台长孙玉胜介绍了《此时此刻——国庆70周年盛典》4K直播电影进院线及粤语版电影的情况…	2019-10-02	文汇报	即时新闻		860
4K粤语版国庆盛典大片湾区首映	http://paper.wenweipo.com/2019/10/03/CN1910030004.htm	据央视新闻报道，由中央广播电视总台央视频出品、央视频和总台大湾区之声联合推出的《此时此刻--国庆70周年盛典》4K直播粤语版电影，国庆期间登陆粤港澳大湾区影院。大湾区观众可望在影院身临其境般重温新中国成立70周年庆典的震撼场面。 10月2日下午，中央广播电视总台、中央人民政府驻香港特别行政区联络办公室与国家电影局，联合在京举办《此时此刻--国庆70周年盛典》4K直播粤语版电影发布会。中宣部副部长、中央广播电视总台台长慎海雄，中央人民政府驻香港特别行政区联络办公室副主任杨健，国家电影局副局长李国奇等出席发布会并启动上线。这是继10月1日总台4K超高清国庆直播信号进入全国70家影院后，4K“直播大片”再次登陆院线。粤港澳大湾区内的首批80余家影院有望率先播映。 发布会上，中央广播电视总台央视副台长孙玉胜介绍了《此时此刻--国庆70周年盛典》4K直播电影进院线及粤语版电影的情况。10月1日当天…	2019-10-03	文汇报	中国专题		860
粤语版盛典大片 湾区80戏院上画	http://117.122.212.150/a.php?f=20191003/zm-31.txt	【大公报讯】据央视新闻报道：由中央广播电视总台央视频出品，央视频和总台大湾区之声联合推出的《此时此刻─国庆70周年盛典》4K直播粤语版电影于10月2日下午发布。中宣部副部长、中央广播电视总台台长慎海雄，中央人民政府驻香港特别行政区联络办公室副主任杨健，国家电影局副局长李国奇等出席发布会并启动上线。国庆期间，粤港澳大湾区内的首批80多家影院将率先播映。观众可望在影院身临其境般重温新中国成立70周年庆典的震撼场面。 这是继10月1日总台4K超高清国庆直播信号进入全国70家影院后，4K“直播大片”再次登陆院线。 慎海雄杨健启动上线 10月2日下午，中央广播电视总台、中央人民政府驻香港特别行政区联络办公室与国家电影局，联合在京举办《此时此刻─国庆70周年盛典》4K直播粤语版电影发布会。中宣部副部长、中央广播电视总台台长慎海雄，中央人民政府驻香港特别行政区联络办公室副主任杨健，国家电影局副局长李国…	2019-10-03	大公报	中国		966
粤语版盛典大片 湾区80戏院上画	http://www.takungpao.com.hk/news/232108/2019/1003/357186.html	图：10月2日下午，《此时此刻—国庆70周年盛典》4K直播粤语版电影发布，国庆期间将登陆粤港澳大湾区影院，中宣部副部长、中央广播电视总台台长慎海雄（左三），香港中联办副主任杨健（右三）等出席发布会并启动上线/网络图片 【大公报讯】据央视新闻报道：由中央广播电视总台央视频出品，央视频和总台大湾区之声联合推出的《此时此刻─国庆70周年盛典》4K直播粤语版电影于10月2日下午发布。中宣部副部长、中央广播电视总台台长慎海雄，中央人民政府驻香港特别行政区联络办公室副主任杨健，国家电影局副局长李国奇等出席发布会并启动上线。国庆期间，粤港澳大湾区内的首批80多家影院将率先播映。观众可望在影院身临其境般重温新中国成立70周年庆典的震撼场面。 这是继10月1日总台4K超高清国庆直播信号进入全国70家影院后，4K“直播大片”再次登陆院线。 慎海雄杨健启动上线 10月2日下午，中央广播电视总台、中央人民政府驻…	2019-10-03 00:00:00	大公报	新闻		1080
国庆70周年盛典4K粤语版电影在香港首映	http://www.hkcd.com/content/2019-10/09/content_1159459.html	【香港商报网讯】记者云逊报道：10月9日上午，由中央广播电视总台央视频、总台大湾区之声、华南电影工作者联合会联合主办，《此时此刻——国庆70周年盛典》4K粤语版电影在香港西九龙圆方戏院举行首映式。香港中联办副主任杨健，全国政协常委、香港旅发局主席林建岳，特区政府商务及经济发展局副局长陈百里等主礼嘉宾，与二百多位社会各界代表一同参加首映仪式，并观看影片。 一众主礼嘉宾在电影播映前，举行剪彩仪式。(云逊摄) 《此时此刻——国庆70周年盛典》4K超高清粤语版电影，由中央广播电视总台央视频出品，央视频和总台大湾区之声联合推出。电影将画面、声效、镜头语言和现场同期巧妙糅合，实现了全流程、全要素的4K体验与5.1环绕声的结合。 香港中联办副主任杨健（左）、香港贸易发展局主席林建岳（右）担任嘉宾。(云逊摄) 电影由中央广播电视总台粤语主持人专门配以粤语解说，更加符合香港观众的观影习惯。观众可以在香港M…	2019-10-09 00:00:00	香港商报	香港		880
国庆盛典粤语版电影将公映	http://today.hkcd.com/content/2019-10/10/content_1159524.html	杨健 林建岳 陈百里主持首映礼 国庆盛典粤语版电影将公映 【香港商报讯】记者云逊报道：由中央广播电视总台央视频、大湾区之声频道、华南电影工作者联合会联合举办的《此时此刻——国庆70周年盛典》4K粤语版电影首映仪式，昨日下午在西九圆方戏院举行。中联办副主任杨健，全国政协常委、贸发局主席林建岳，商经局副局长陈百里等主礼嘉宾参加了首映仪式，并与现场200多名人士通过影片，共同重温新中国成立70周年庆典的震撼场面。该片将于日内全港公映。 让观众了解国家非凡成就 杨健在首映仪式上致辞表示，10月1日，庆祝中华人民共和国成立70周年大会在北京天安门广场隆重举行，首都北京吸引了全世界的目光。20余万军民以盛大的阅兵仪式和群众游行欢庆共和国70周年华诞，庆祝大会是对70年国家辉煌历史的致敬，是国力和自信的展现。 陈百里指出，该电影粤语版在香港上映，让香港观众进一步认识和了解国家过去70年所取得的非凡成就…	2019-10-10	香港商报	香港新闻		982
粤语解说首部直播院线电影	http://117.122.212.150/a.php?f=20191010/mf-2.txt	【大公报讯】记者徐小惠报道：今年的十月一日，中国首部直播院线电影《此时此刻─共庆新中国70华诞》在全国十余个省份七十家影院同步播出，中央广播电视总台通过4K超高清信号，以卫星传输的方式，在大银幕上直播中华人民共和国成立七十周年庆祝大会、阅兵仪式和群众游行的场面。 杨健在今天的开幕礼上称之为“纪录电影的生产方式与播出方式的创新，令所有观众身临其境的感受阅兵、游行的盛大场面。” 国庆当天，大湾区之声亦实现了首次用粤语直播国庆盛典，之后4K粤语版《此时此刻──国庆70周年庆典》于十月二日宣布登陆粤港澳大湾区八十家影院，影片由知名粤语主持人陈星、晓东以粤语配音解说。	2019-10-10	大公报	文化		294
粤语解说首部直播院线电影	http://www.takungpao.com.hk/culture/237147/2019/1010/359547.html	【大公报讯】记者徐小惠报道：今年的十月一日，中国首部直播院线电影《此时此刻─共庆新中国70华诞》在全国十余个省份七十家影院同步播出，中央广播电视总台通过4K超高清信号，以卫星传输的方式，在大银幕上直播中华人民共和国成立七十周年庆祝大会、阅兵仪式和群众游行的场面。 杨健在今天的开幕礼上称之为“纪录电影的生产方式与播出方式的创新，令所有观众身临其境的感受阅兵、游行的盛大场面。” 国庆当天，大湾区之声亦实现了首次用粤语直播国庆盛典，之后4K粤语版《此时此刻──国庆70周年庆典》于十月二日宣布登陆粤港澳大湾区八十家影院，影片由知名粤语主持人陈星、晓东以粤语配音解说。	2019-10-10 00:00:00	大公报	艺文		294
国庆盛典粤语版电影香港公映 杨健 林建岳 陈百里主持首映礼	http://www.hkcd.com/content/2019-10/10/content_1159565.html	《此时此刻——国庆70 周年盛典》4K 直播粤语版电影于香港首映，观众可在影院身临其境般重温新中国成立70 周年庆典的震撼场面。图为全体参加者站立唱国歌。中通社 【香港商报网讯】记者云逊报道：由中央广播电视总台央视频、大湾区之声频道、华南电影工作者联合会联合举办的《此时此刻——国庆70周年盛典》4K粤语版电影首映仪式，昨日下午在西九圆方戏院举行。中联办副主任杨健，全国政协常委、贸发局主席林建岳，商经局副局长陈百里等主礼嘉宾参加了首映仪式，并与现场200多名人士通过影片，共同重温新中国成立70周年庆典的震撼场面。该片将于日内全港公映。 让观众了解国家非凡成就 杨健在首映仪式上致辞表示，10月1日，庆祝中华人民共和国成立70周年大会在北京天安门广场隆重举行，首都北京吸引了全世界的目光。20余万军民以盛大的阅兵仪式和群众游行欢庆共和国70周年华诞，庆祝大会是对70年国家辉煌历史的致敬，是国力和…	2019-10-10 00:00:00	香港商报	香港		1022
国庆盛典粤语版电影香港公映 杨健 林建岳 陈百里主持首映礼	http://www.hkcd.com/content/2019-10/10/content_1159565.html	《此时此刻——国庆70 周年盛典》4K 直播粤语版电影于香港首映，观众可在影院身临其境般重温新中国成立70 周年庆典的震撼场面。图为全体参加者站立唱国歌。中通社 【香港商报网讯】记者云逊报道：由中央广播电视总台央视频、大湾区之声频道、华南电影工作者联合会联合举办的《此时此刻——国庆70周年盛典》4K粤语版电影首映仪式，昨日下午在西九圆方戏院举行。中联办副主任杨健，全国政协常委、贸发局主席林建岳，商经局副局长陈百里等主礼嘉宾参加了首映仪式，并与现场200多名人士通过影片，共同重温新中国成立70周年庆典的震撼场面。该片将于日内全港公映。 让观众了解国家非凡成就 杨健在首映仪式上致辞表示，10月1日，庆祝中华人民共和国成立70周年大会在北京天安门广场隆重举行，首都北京吸引了全世界的目光。20余万军民以盛大的阅兵仪式和群众游行欢庆共和国70周年华诞，庆祝大会是对70年国家辉煌历史的致敬，是国力和…	2019-10-10	香港商报	即时新闻		1030
《此时此刻——国庆70周年盛典》 4K粤语版电影在澳门首映	http://paper.ce.cn/jjrb/html/2019-10/13/content_402688.htm	据新华社澳门电 （记者郭鑫） 由中央广播电视总台央视频和大湾区之声联合推出的《此时此刻——国庆70周年盛典》4K粤语版电影，11日在澳门永乐戏院举行首映仪式，澳门观众身临其境般重温新中国成立70周年大会的震撼场面，祝福祖国繁荣富强，再创辉煌。 首映仪式在雄壮的国歌声中拉开序幕，澳门各界200多位嘉宾和学生代表出席仪式。 《此时此刻——国庆70周年盛典》粤语版电影将画面、声效、镜头语言巧妙糅合，实现全流程、全要素4K体验和5.1环绕声结合运用，配以粤语现场同期解说，语言贴近观众，再次呈现国庆盛典。 《此时此刻——国庆70周年盛典》4K粤语版电影将在澳门各大院线放映。	2019-10-13	北京经济日报	要闻		308
龙剑飞反映香港命运妙论粤语片	http://stepaper.stheadline.com/news_content.asp?newsid=E01152.txt&newscat=E&newsdate=2019-10-22	这是一本花了二十年精心编写的书，主旨只有一个︰为大家讲清楚、说明白，粤语片是甚么。作者任教大学电影学院二十年，本书收集了他多年研究粤语片心得，是坊间珍贵的香港文化记录。 文：王文宇 图：星岛图片库 开卷之前，我想了一想，自小看粤语长片，只觉得粤语片跟西片、国语片有好大分别，但说不出深层次的分别在哪里，看罢此书，我就有点心得，首先，从一部经典作《如来神掌》说起。 此片只应粤语有，其他那得几回闻——《如来神掌》是不可被复制的香港粤语片，作者称之为“香港文化的组成部分”，任你是塔伦天奴都要却步。电影有五集（曹达华、于素秋版本），是为中国伦理与武侠文化的缩影，我们细心剖析外形朴拙，看似平平的主角龙剑飞，其实代表上世纪五十年代的香港。战后香港不外是一个百废待举、经济薄弱的港口城市，犹如《如来神掌》第一集开场的龙剑飞，面部被爱人打伤破相，不被师傅待见，连招呼宾客都不用他，嫌他失礼。 香港何以顷刻改变…	2019-10-22	星岛日报	副刊		1897
穗争取粤语电影审批权限落地	http://www.takungpao.com.hk/news/232108/2019/1029/367107.html	【大公报讯】记者黄宝仪广州报道：建设大湾区文化中心是广州“四个出新出彩”行动方案的一个重要内容，广州将通过争取创立大湾区艺术创研中心，研究制定文化交流合作便利化政策，简化港澳企业及个人来穗文化活动审批程序，支持广州建设大湾区影视后期制作中心，争取粤语电影审批权限落地广东（广州），打造粤港澳大湾区演艺中心等措施，促进穗港两地文艺合作。 “广州市推动城市文化综合实力出新出彩行动方案”列出八大重点任务，包括人文湾区共建工程、岭南文化中心建设工程、对外文化交流门户建设工程等内容。当中最受港人关注的要数人文湾区共建工程，涉及争取文化和旅游部在广州创立粤港澳大湾区艺术创研中心；联合香港、澳门开展跨界重大文化遗产保护，建设粤港澳文化遗产游径；打造“穗港澳青少年文化交流季”活动品牌；加快构建穗港马匹运动及相关产业经济圈等。 香港浸会大学“电影学院”创办人、特区政府“电影发展基金委员”（2013-2019…	2019-10-29 00:00:00	大公报	新闻		549
粤语吟诵吻合中原古雅音	http://www.hkcd.com/content/2019-11/11/content_1164325.html	粤语吟诵，顾名思义就是以粤语吟诵古典诗词的一种诵读，既有韵，又有调。根据《香港首份非物质文化遗产清单》项目1.9所载，“广东吟诵”的涵义是：“『吟诵』是传统的教学方法，也是读书人采用的读书方法。吟诵者会以广东方言，按乐音将古典诗词文章唱出来。” 粤语保古音 吟诵更富韵味 莫云汉，香港珠海学院中国文学系教授，粤语吟诵爱好者、研究者。“诗词最佳的演绎方式就是『吟诵』。昔年，我曾经创作过一首七绝，题为〈粤语吟诵诗文，易悟其意，为赋一绝〉：『吻合中原古雅音，诗文到手好哦吟。浮声切响如旋律，哀怨激昂感入心。』说的粤语本身就是吻合唐宋时期中原古音，以此吟诵当时诗词，分外富有韵味。” 粤语保留中古汉语的特点，“平、上、去、入”四声俱全，适宜于唐宋诗词的朗诵。莫云汉指出：“今日的普通话起源于元、明时期，以北京话为基础，已没有了『入声』，而且把大部分『合口音』改为『开口音』，于是同样是诗词吟诵，但技巧与韵…	2019-11-11 00:00:00	香港商报	新风物		1341
湾区35%青年喜欢粤语歌寻共鸣 粤剧非遗互联网专区受热捧	http://news.wenweipo.com/2019/11/17/IN1911170032.htm	【文汇网讯】(香港文汇网记者 方俊明)随著粤港澳青年文化之旅、香港“青年内地交流资助计划”等项目实施，“人文湾区”建设加速。记者17日从酷狗音乐发布《粤港澳大湾区青年数字文化报告2019》(下称《报告》)获悉，近35%湾区青年喜欢在粤语歌中寻找共鸣;而由红线女等名伶名家作品开设的数字音乐“粤剧专区”，以及《非遗大师课》等特色直播，受到湾区青年的热捧，不仅体现湾区青年对本土文化的认可和热爱，而且“科技+文化”成为湾区文化发展的新亮点。 报告显示，粤港澳大湾区近35%青年喜欢在粤语歌中寻找共鸣。(记者 方俊明 摄) 《报告》通过对港澳及珠三角9市的14到28岁青年用户大数据分析，解读大湾区青年在数字文化方面的行为特征。首先，基于粤语文化的相通，粤语歌曲在湾区青年中十分流行;相较于粤语歌在全国青年中约22%的收听率，湾区青年以近35%相对领先。而由红线女、罗家宝等名伶名家作品，广东粤剧院的青年…	2019-11-17	文汇报	即时新闻		986
35%湾区青年粤语歌中寻共鸣	http://paper.wenweipo.com/2019/11/18/CH1911180007.htm	（记者 方俊明 广州报道）随着粤港澳青年文化之旅、香港“青年内地交流资助计划”等项目实施，“人文湾区”建设加速。香港文汇报记者昨日从酷狗音乐发布的《粤港澳大湾区青年数字文化报告2019》（下称《报告》）获悉，近35%湾区青年喜欢在粤语歌中寻找共鸣；而由红线女等名伶名家作品开设的数字音乐“粤剧专区”，以及《非遗大师课》等特色直播，受到湾区青年的热捧，不仅体现湾区青年对本土文化的认可和热爱，而且“科技+文化”成为湾区文化发展的新亮点。 《报告》通过分析港澳及珠三角9市的14岁到28岁青年用户大数据，解读大湾区青年在数字文化方面的行为特征。首先，基于粤语文化的相通，粤语歌曲在湾区青年中十分流行；相较于粤语歌在全国青年中约22%的收听率，湾区青年以近35%相对领先。 传统艺术直播成青年新宠 而由红线女、罗家宝等名伶名家作品，广东粤剧院的青年粤剧演员演绎推出的数字音乐“粤剧专区”；以及传统艺术《隽…	2019-11-18	文汇报	内地		787
35%湾区青年粤语歌中寻共鸣	http://paper.wenweipo.com/2019/11/18/CN1911180004.htm	（记者 方俊明 广州报道）随着粤港澳青年文化之旅、香港“青年内地交流资助计划”等项目实施，“人文湾区”建设加速。香港文汇报记者昨日从酷狗音乐发布的《粤港澳大湾区青年数字文化报告2019》（下称《报告》）获悉，近35%湾区青年喜欢在粤语歌中寻找共鸣；而由红线女等名伶名家作品开设的数字音乐“粤剧专区”，以及《非遗大师课》等特色直播，受到湾区青年的热捧，不仅体现湾区青年对本土文化的认可和热爱，而且“科技+文化”成为湾区文化发展的新亮点。 《报告》通过分析港澳及珠三角9市的14岁到28岁青年用户大数据，解读大湾区青年在数字文化方面的行为特征。首先，基于粤语文化的相通，粤语歌曲在湾区青年中十分流行；相较于粤语歌在全国青年中约22%的收听率，湾区青年以近35%相对领先。 传统艺术直播成青年新宠 而由红线女、罗家宝等名伶名家作品，广东粤剧院的青年粤剧演员演绎推出的数字音乐“粤剧专区”；以及传统艺术《隽…	2019-11-18	文汇报	中国专题		787
三成半湾区青年粤语歌寻共鸣	http://117.122.212.150/a.php?f=20191118/zm-33.txt	【大公报讯】记者方俊明广州报道：记者17日从酷狗音乐发布《粤港澳大湾区青年数字文化报告2019》获悉，近35%湾区青年喜欢在粤语歌中寻找共鸣；而由红线女等名伶名家作品开设的数字音乐“粤剧专区”以及《非遗大师课》等特色直播受到湾区青年的热捧。 《报告》通过对港澳及珠三角9市的14到28岁青年用户大数据分析，解读大湾区青年在数字文化方面的行为特征。 相较于粤语歌在内地青年中约22%的收听率，湾区青年以近35%相对领先。而由红线女等名伶名家作品以及传统艺术《非遗大师课》等特色直播受到湾区青年欢迎。 “『数字音乐』在湾区发展迅速，以创造性转化弘扬传统文化成为目前粤港澳大湾区文化发展的一大亮点。”酷狗音乐相关负责人表示，“科技＋文化”正助推湾区人文建设，包括新亮相的X5真无线耳机、潘多拉mini便携AI音箱等“黑科技”，满足湾区不同人群与使用场景的智能化、个性化需求。	2019-11-18	大公报	中国		401
三成半湾区青年粤语歌寻共鸣	http://www.takungpao.com.hk/news/232108/2019/1118/376075.html	图：图为数字音乐“黑科技”产品展示\大公报记者方俊明摄 【大公报讯】记者方俊明广州报道：记者17日从酷狗音乐发布《粤港澳大湾区青年数字文化报告2019》获悉，近35%湾区青年喜欢在粤语歌中寻找共鸣；而由红线女等名伶名家作品开设的数字音乐“粤剧专区”以及《非遗大师课》等特色直播受到湾区青年的热捧。 《报告》通过对港澳及珠三角9市的14到28岁青年用户大数据分析，解读大湾区青年在数字文化方面的行为特征。 相较于粤语歌在内地青年中约22%的收听率，湾区青年以近35%相对领先。而由红线女等名伶名家作品以及传统艺术《非遗大师课》等特色直播受到湾区青年欢迎。 “『数字音乐』在湾区发展迅速，以创造性转化弘扬传统文化成为目前粤港澳大湾区文化发展的一大亮点。”酷狗音乐相关负责人表示，“科技＋文化”正助推湾区人文建设，包括新亮相的X5真无线耳机、潘多拉mini便携AI音箱等“黑科技”，满足湾区不同人群与使用…	2019-11-18 00:00:00	大公报	新闻		434
三成半湾区青年粤语歌寻共鸣	http://www.takungpao.com.hk/news/232108/2019/1118/375789.html	图：图为数字音乐“黑科技”产品展示\大公报记者方俊明摄 【大公报讯】记者方俊明广州报道：记者17日从酷狗音乐发布《粤港澳大湾区青年数字文化报告2019》获悉，近35%湾区青年喜欢在粤语歌中寻找共鸣；而由红线女等名伶名家作品开设的数字音乐“粤剧专区”以及《非遗大师课》等特色直播受到湾区青年的热捧。 《报告》通过对港澳及珠三角9市的14到28岁青年用户大数据分析，解读大湾区青年在数字文化方面的行为特征。 相较于粤语歌在内地青年中约22%的收听率，湾区青年以近35%相对领先。而由红线女等名伶名家作品以及传统艺术《非遗大师课》等特色直播受到湾区青年欢迎。 “『数字音乐』在湾区发展迅速，以创造性转化弘扬传统文化成为目前粤港澳大湾区文化发展的一大亮点。”酷狗音乐相关负责人表示，“科技＋文化”正助推湾区人文建设，包括新亮相的X5真无线耳机、潘多拉mini便携AI音箱等“黑科技”，满足湾区不同人群与使用…	2019-11-18 00:00:00	大公报	新闻		434
有教无“累”：粤语金曲变英文歌 死板词汇轻松入脑	http://premium.mingpao.com/cfm/Content_News.cfm?Channel=ja&Path=101157506193/oaa1.cfm	【明报专讯】很多人相信，要学好英文，首要是多读、多写、多背诵。不过，有两间学校的校长不约而同地认为，用唱歌来学英文，把死板的句式、词汇及拼音和跳跃的音符结合起来，让学生边唱边学，可以提升学习兴趣，成效比不停抄写背诵更大。 文：许朝茵 位于锦田的通德学校（下称通德），是一间奉行灵活教学方法的村校小学，每级只有一班。采访当天的早上，三年级生正在上英文课，记者甫踏进课室，听到的并非铿锵的英文朗诵声音，而是一首熟悉的流行曲，原来班房内，音乐科教师周乐平（周sir）正弹奏着广东流行金曲。同时，英文科林老师则用投影机在墙上投射歌词，然而并非原版广东话歌词，而是“二次创作”的英文歌词。以其中最为人熟悉的一句为例——“原谅我这一生不羁放纵爱自由”，林老师就改成“We can watch a movie in a big and grand cinema ”。 音乐科英文科教师合作 在课堂上，20多个学生…	2019-11-19	明报	Happy Pa Ma		2140
吾尔开希经港转机 粤语直播冀港人加油 19:43	https://www2.hkej.com/instantnews/current/article/2312120/	八九学运领袖吾尔开希下午约4时在社交网站直播，表示自己身在香港机场准备转机，并以广东话鼓励香港人。 他指出，香港民主派在区议会选举取得300多个议席，感到非常开心。他作为台湾人、维吾尔人、大陆民运人士，尤其是“黄雀行动”受益者，要向香港表达敬意和支持。 吾尔开希又称，自己的心与港人在一起，希望香港加油，并高叫“时代革命、愿荣光归香港”等口号。	2019-11-25	信报	即时时事脉搏		184
推首套学前儿童粤语口语能力测试工具 卫署：更准确诊断语障 19:18	https://news.mingpao.com/ins/%e6%b8%af%e8%81%9e/article/20191205/s00001/1575543564120/%e6%8e%a8%e9%a6%96%e5%a5%97%e5%ad%b8%e5%89%8d%e5%85%92%e7%ab%a5%e7%b2%b5%e8%aa%9e%e5%8f%a3%e8%aa%9e%e8%83%bd%e5%8a%9b%e6%b8%ac%e8%a9%a6%e5%b7%a5%e5%85%b7-%e8%a1%9b%e7%b	卫生署今日（5日）推出“香港学前儿童口语（粤语）能力测试”，可评定2岁半至5岁11个月大、使用粤语的本地学前儿童口语能力。署方表示，这是首套本地研发及全面的粤语语言评估工具，有助言语治疗师更准确诊断本地儿童的语言发展障碍。 本地言语治疗师以往只能使用外国研发的评估工具，为使用粤语的本地学前儿童进行评估。卫生署儿童体能智力测验服务的跨专业团队自2013年起，与本港的大学专科教授，以及研究范畴的专家学者，包括港大、理大及教大学者合作，从全港18区幼儿园及幼稚园招募不同分层、使用粤语的本地学前儿童，搜集数据研发“香港学前儿童口语（粤语）能力测试”，作为语言评估的参照标准。 “香港学前儿童口语（粤语）能力测试”定价为每套5,440元，目标使用者主要为在公营机构、非政府组织及私人执业的言语治疗师，他们要具备公认大学课程的专业资格，并能操流利粤语和对粤语语法有深入认识。 其他报道：长洲1.4级地震 …	2019-12-05	明报	即时港闻		507
出粤语文宣《人民日报》图文并茂	http://stepaper.stheadline.com/news_content.asp?newsid=A16047.txt&newscat=A1&newsdate=2019-12-06	反修例风波持续近半年以来，内地官媒《人民日报》经常发表评论批评暴力行为，并反对外国干涉中国与香港内政。《人民日报》昨日又再发表一篇以“香港经济刮飓风，罪在反对派”为题的评论文章。值得留意的是，今次文章配上一张粤语文宣图片，以港人为受众。这幅粤语文宣图片上列有八项数据，细列香港近期经济出现负增长、失业率上升、零售额大跌等数字，并将它们包围代表香港的男子。文宣又写到“比经济寒冬更衰嘅嘢，系道德沦丧后嘅沉沦”，更以一行红色字体表示“寻日嘅暴力，毁咗未来嘅发展”。 文章批评，不让社会正常运转，就是要破坏香港营商环境，就是想玩“揽炒”、一心和港府“夺权”，而“揽炒”炒不了有资产的人，炒的是基层市民和学生。文章又认为，各行各业已成“社会动荡、暴力泛滥”下的受害者，又认为香港局势发展至此并不必然，广大市民要“埋单”本可避免，吁港人“向反中乱港分子说不”。 维港会	2019-12-06	星岛日报	港闻		391
卫生署首推粤语能力测试工具助准确判断学前儿童语障问题 11:55	http://std.stheadline.com/instant/articles/detail/1154333/%E5%8D%B3%E6%99%82-%E9%A6%99%E6%B8%AF-%E8%A1%9E%E7%94%9F%E7%BD%B2%E9%A6%96%E6%8E%A8%E7%B2%B5%E8%AA%9E%E8%83%BD%E5%8A%9B%E6%B8%AC%E8%A9%A6%E5%B7%A5%E5%85%B7-%E5%8A%A9%E6%BA%96%E7%A2%BA%E5%88%A4%E6%	本地言语治疗师以往只能使用外国研发的评估工具，为说粤语的学前儿童进行评估，未能贴近实际需要。卫生署昨日推出本地研发的“香港学前儿童口语（粤语）能力测试”，针对2岁6个月至5岁11个月、使用粤语的本地学前儿童的口语能力，有助更准确诊断学前儿童的语言发展情况。 “香港学前儿童口语（粤语）能力测试”，由卫生署儿童体能智力测验服务的跨专业团队，联同港大、理大及教大的专家及学者，在全港的幼儿园及幼稚园采集不同资料数据，为语言评估提供参照标准。 测试内容包括四个分测验：语法理解、语法表达、故事理解和名词表达，每次测试需时45至60分钟，但只供公营机构、非政府组织及私人执业的言语治疗师使用。	2019-12-06	星岛日报	即时香港		304
卫生署首推粤语能力测试工具 助准确判断学前儿童语障问题	http://www.stheadline.com/inews-content.php?cat=a&nid=248561	本地言语治疗师以往只能使用外国研发的评估工具，为说粤语的学前儿童进行评估，未能贴近实际需要。卫生署昨日推出本地研发的“香港学前儿童口语（粤语）能力测试”，针对2岁6个月至5岁11个月、使用粤语的本地学前儿童的口语能力，有助更准确诊断学前儿童的语言发展情况。 “香港学前儿童口语（粤语）能力测试”，由卫生署儿童体能智力测验服务的跨专业团队，联同港大、理大及教大的专家及学者，在全港的幼儿园及幼稚园采集不同资料数据，为语言评估提供参照标准。 测试内容包括四个分测验：语法理解、语法表达、故事理解和名词表达，每次测试需时45至60分钟，但只供公营机构、非政府组织及私人执业的言语治疗师使用。	2019-12-06	头条日报	即时港闻		304
粤语话剧内地受追捧 高志森开拓市场信心足	http://paper.wenweipo.com/2019/01/12/YC1901120002.htm	《亲爱的，胡雪岩》、《金锁记》、《阮玲玉》、《南海十三郎》近年来，一批原汁原味的香港剧目在内地受到热捧，粤语话剧得到观众普遍认可，香港导演高志森本月9日出席第二届华语戏剧盛典颁奖晚会并接受记者采访，其间表示内地市场空间大，艺术上的包容性甚至超越香港，他对于未来开拓市场信心十足。 十几年前，使用包括粤语在内的方言表演舞台剧，在内地受众并不多，这种情况近年得到明显改善。无论是在盛典中成为大赢家的《亲爱的，胡雪岩》，还是其他香港剧目，在内地巡演基本场场爆满，可谓是一票难求。《金锁记》获得第二届华语戏剧盛典最佳复排剧目题名，高志森此次专门前来广州支持。他告诉记者，如今香港话剧到内地演出，观众都希望欣赏到原汁原味的版本，甚至在签署合同时，粤语演出就被明确提出。 《金锁记》在内地演出结束不久，高志森就在微博上看到了很多观后感，观众对于话剧中原汁原味的港味全部接受并表示毫无违和感，高志森对于这种改变非…	2019-01-12	文汇报	艺粹		680
HomePod粤语声控 播歌开灯瓣瓣掂	http://orientaldaily.on.cc/cnt/lifestyle/20190115/00300_001.html	踏入智能家居年代，居企的灯光、冷气机、音响系统已逐步智能化，Amazon、小米等厂商已先后抢攻这兵家必争之地。等了又等，Apple终于将智能喇叭HomePod引进香港，本报率先取得真机试玩，发觉这果迷“神物”不但已支援广东话Siri声控，还可当作智能家居控制中枢，开句声就能播歌、开灯或锁上大门，真正入得厨房出得厅堂！ 外形简约前卫 外形有点像当年Mac Pro圆桶形电脑的HomePod，高172mm、阔142mm，表面以无缝网状布料包裹，顶部设有触控屏幕，全机只有一条电源线，没有任何I/O连接埠，设计极之简约。颜色有纯白、太空灰两款选择，无论哪一只色，重量都达2.5kg，拎上手具一定分量，好处是座枱稳阵，配以硅胶底座具防滑防震作用，家中有养宠物人士都唔怕将佢整跌。 1分钟完成设定 别以为智能家居一定好复杂，新机的设定跟AirPods一样简单，先将iOS装置连接至Wi-Fi并启动蓝牙，再靠…	2019-01-15	东方日报	科技新知		1230
不谙粤语患脑退化症 热心店主寻回失踪七旬妇 (16:03)	http://m.on.cc/nc/hknews/20190120/20190120160356lc.html	【on.cc东网专讯】77岁老妇陈秉樱，昨日(19日)早上与家人同游黄大仙摩士公园后失踪，其家人同日报警。陈身高1.6米，体重约64公斤，肥身材，长面型，黄皮肤及蓄短白发。她最后露面时身穿格仔厚外套、灰色羽绒背心、深蓝色长裤及紫色运动鞋。 据陈的家人透露，她早前由内地来港探亲，患有脑退化症，操普通话，不谙粤语。家人担心她遇到意外，遂到不同地方寻其下落。至今日(20日)下午，陈被发现在新蒲岗区，蹲在一间玩具店外，店主觉有可疑报警求助。警方接报把她带返警署，并通知其家人到警署了解。	2019-01-20	东方日报	即时港闻		248
中联办新春酒会|王志民粤语给港人拜年:“恭喜发财”	http://news.wenweipo.com/2019/01/29/IN1901290060.htm	香港中联办酒会29日举行。图为王志民致辞（全媒体记者麦钧杰摄） 【文汇网讯】大公文汇全媒体报道：中央人民政府驻香港特别行政区联络办公室（香港中联办）今日（29日）在湾仔国际会展中心举行新春酒会。香港中联办主任王志民出席酒会并致辞。王志民在致辞开始时以粤语“猪年吉祥如意，家庭幸福，恭喜发财！”向来宾和香港市民拜年。 （大公文汇全媒体新闻中心供稿） 责任编辑：京辰	2019-01-29	文汇报	即时新闻		198
王志民粤语给港人拜年:“恭喜发财”	http://www.hkcd.com/content/2019-01/29/content_1122118.html	香港中联办酒会29日举行。图为王志民致辞（记者 刘深摄） 【香港商报网讯】香港中联办今日在湾仔国际会展中心举行新春酒会。香港中联办主任王志民出席酒会并致辞。王志民在致辞开始时以粤语“猪年吉祥如意，家庭幸福，恭喜发财!”向来宾和香港市民拜年。	2019-01-29	香港商报	即时新闻		135
王志民粤语给港人拜年:“恭喜发财”	http://www.hkcd.com/content/2019-01/29/content_1122118.html	香港中联办酒会29日举行。图为王志民致辞（记者 刘深摄） 【香港商报网讯】香港中联办今日在湾仔国际会展中心举行新春酒会。香港中联办主任王志民出席酒会并致辞。王志民在致辞开始时以粤语“猪年吉祥如意，家庭幸福，恭喜发财!”向来宾和香港市民拜年。	2019-01-29 00:00:00	香港商报	香港		127
主任流利粤语向市民拜年	http://www.takungpao.com.hk/news/232108/2019/0130/242631.html	中联办员工过去一年积极“学粤语、讲粤语”，昨日是传统节日“过小年”，中联办主任王志民用流利粤语向酒会嘉宾和全港市民拜早年，“祝大家猪年吉祥如意，家庭幸福，恭喜发财！”	2019-01-30 00:00:00	大公报	新闻		85
撑粤语组织：学校禁粤语违儿童公约	http://premium.mingpao.com/cfm/Content_News.cfm?Channel=gb&Path=202306024446/gfb1.cfm	【明报专讯】港语学、学生动源及香港民族阵线等组织昨举行“终结普教中制度暴力誓师大会”，期望终结普教中，又批评有学校打压说粤语的本港学童，违反《儿童权利公约》，望引起国际社会关注。 1700人联署 港语学：社工应留意 “港语学”召集人陈乐行昨说，昨日是联合国的国际母语日，望大众关心本港的母语情况。他说，约一星期前开始发起联署行动，内容为早前有传媒报道有学校以惩罚方式禁止学生课时内说粤语，违反儿童权利公约，惩罚亦伤害学童心理。陈乐行称，最新有1700人联署，觉得“成绩鼓舞”，联署会交予联合国儿童基金会、欧洲议会人权小组等。 陈乐行又称，过往曾有学校禁止学生说粤语，反映传媒报道的事件并非独立例子，“相信不同地区都可能会有此情况”。他认为，地区工作者或社工应多加留意情况，亦欢迎任何关注此议题的组织加入行动。 学生动源召集人钟翰林表示，将发起“全港一人一信”行动，花一个月于街站及网上收集信件后寄去…	2019-02-22	明报	教育		515
“大湾区粤语电影机遇”论坛今举行 黄百鸣:大湾区是粤语电影振兴机会	http://news.wenweipo.com/2019/03/20/IN1903200028.htm	“大湾区粤语电影机遇”论坛今日（20日）上午在香港会展中心举行 【文汇网讯】大公文汇全媒体记者张琦报道：香港电影制作发行协会理事长黄百鸣今日（20日）上午在“大湾区粤语电影机遇”论坛上表示，粤语电影需要受保护，大湾区是粤语电影振兴的机会。当年香港700万人口能产生奇迹，现在大湾区11个城市有7000万人口，是以前的10倍，一样可以。黄百鸣表示，因为广州是全国最熟悉岭南文化的地区，如果合拍片的审批程序放在广州，相信对粤语电影会有很大帮助。 “大湾区粤语电影机遇”论坛今天在香港会展中心举行，邀请香港电影制作发行协会理事长黄百鸣、监事长张启平，珠影集团副总经理黄昌宁，广东省电影行业协会秘书长郑大卫，澳门电影导演徐欣羡及香港电影发展局委员卓伯棠等作为论坛讲者，探讨粤港澳大湾区在粤语电影发展中发挥的作用。 香港商务及经济发展局副局长陈百里（左）、香港电影发展局主席马逢国（右）出席论坛。图为中联办宣…	2019-03-20	文汇报	即时新闻		930
向雪怀：大湾区让粤语音乐人有落脚点 能再放眼世界	http://www.takungpao.com.hk/hongkong/text/2019/0321/265636.html	大公文汇全媒体记者张琦报道：“香港亚洲流行音乐节”商贸论坛今日（21日）上午在湾仔会展中心举行，腾讯音乐娱乐集团副总裁吴伟林、太合音乐集团副总裁杨浩宇、广东省电视台珠江频道总监倪卓宏、CMC live 华人文化演艺CEO洪迪、粤港澳大湾区音乐艺术联盟联席主席向雪怀及摩登天空创始人兼总裁沈黎晖出席论坛，探讨分享粤港澳大湾区政策下的粤语歌曲新机遇。 “香港亚洲流行音乐节”商贸论坛今举行，邀请6位嘉宾分享粤语歌曲新机遇（全媒体记者张琦摄 作为香港著名的粤语流行曲填词人，向雪怀经历了八九十年代的辉煌时期。他表示，现在的年轻人自怨自艾没有勇气去闯，是香港缺乏有影响力新人的主要原因。香港音乐人在内地没有市场，是因为很多人将简单的东西复杂化。他说，音乐要回归简单、情怀，越简单的音乐越难写，也越打动人。 粤港澳大湾区音乐艺术联盟联席主席向雪怀（全媒体记者张琦摄 向雪怀表示，在交通方式、沟通方式上，大湾区…	2019-03-21 00:00:00	大公报	文章		894
科大伙内地AI龙头 研发粤语聊天机械人	http://premium.mingpao.com/cfm/Content_News.cfm?Channel=gb&Path=101153533263/gha1.cfm	【明报专讯】主攻客户服务聊天机械人的内地龙头公司“上海智臻智能网络科技”（简称“小i机器人”）去年在港成立亚太区总部，昨日与香港科技大学签署合作协议，成立“香港科技大学-小i机器人机器学习及认知推理联合实验室”，进行为期3年的合作研究，以语言理解、分析及推理为主要研究方向，小i机器人将提供研究经费，以期加快开发粤语语音识别产品。 小i机器人创始人兼首席执行官朱频频表示，公司现为内地及本港多间银行、政府部门等提供聊天机械人解决方案，去年在港成立亚太区总部后，有意进一步开发适合本地使用的“港版粤语”聊天机械人产品，因此首次与本地大学合作，成立联合实验室，共同开展科研项目。 “AI从感知智能迈向认知智能” 朱频频说，人工智能（AI）技术现正从“感知智能”迈向“认知智能”，“感知智能”包括图像识别、语音识别，而“认知智能”则是对语言的理解。小i机器人专注“认知智能”研发，由语言理解发展至语言分析…	2019-03-26	明报	港闻		763
城市沙龙：看得见的粤语	http://premium.mingpao.com/cfm/Content_News.cfm?Channel=gb&Path=202307096586/gfk1_er.cfm	【明报专讯】学习语文不一定要死记硬背，部分词汇用语跟历史、文化相关，只要了解背后的事迹或因由，自然能够好好吸收和运用。粤语同样盛载了粤地丰富的文化，一些相关的事物，到现在仍然能看得见，甚至触摸体验，所以“行万里路”有时也有助于“读万卷书”，外出体验与语文学习其实相辅相成。 “乌利单刀”真有其刀 因为拍摄电视节目的关系，有机会跟随制作团队到江门新会的学宫。学宫是古时的官方学校，现在的新会学宫已经变成博物馆，属于广东省级文物建筑。博物馆在休馆的日子特意让我们入内，摄影师用镜头记录古雅的环境与展品，我沿着展示柜走到一把生锈的单刀面前。这把单刀虽然陌生，但常常出现于日常对话当中，就是用来形容人做事糊里糊涂的“乌哩单刀”。 民间流传这把单刀属于元朝将军“乌利”，所以应写成“乌利单刀”，意思源于一次乌利要阻止明军带兵前往荷塘。乌利性格急躁，不理部下，自己快马先到水边。船家因为船小，无法载马，但于乌利…	2019-03-29	明报	教育		1073
学粤语对话 显长期侵占野心	http://paper.wenweipo.com/2019/04/06/CN1904060013.htm	在该批史料中，几页由粤、日双语组成的手写学习资料夹在其中，显然为日军占领香港时期学习粤语的记录资料。其中一页资料更以对话形式记录生活化的粤语场景，例如“你食咗饭未呀”、“你的鱼几多钱一条呢”字迹工整，显示出日军想要长期侵占香港，并渗入生活各层面的野心。 香港日占时期又称香港沦陷时期，俗称为“三年零八个月”，是指第二次世界大战时日本军事统治香港的时期，即由1941年12月25日港督杨慕琦向日本无条件投降，至1945年8月15日为止。 日军在占领香港后随即成立军政厅，由酒井隆出任最高长官。其间，日军在香港滥杀无辜，又在香港实行皇民教育，除了禁止使用英文及强迫使用日文外，香港的街道地区名称亦被改成日文。香港市民在经济、民生等方面皆受摧残。	2019-04-06	文汇报	中国专题		332
科大伙内地AI龙头 研发粤语聊天机械人	http://premium.mingpao.com/cfm/Content_News.cfm?Channel=gb&Path=101153949093/gfk2_er.cfm	【明报专讯】主攻客户服务聊天机械人的内地龙头公司“上海智臻智能网络科技”（简称“小i机器人”）2018年在港成立亚太区总部，创始人兼首席执行官朱频频表示，公司现为内地及本港多间银行、政府部门等提供聊天机械人解决方案，有意进一步开发适合本地使用的“港版粤语”聊天机械人产品，故早前与香港科技大学签署合作协议，成立“香港科技大学——小i机器人机器学习及认知推理联合实验室”，开展为期3年的合作研究，小i机器人将提供研究经费，以期加快开发粤语语音识别产品。 朱频频表示人工智能技术正从“感知智能”迈向“认知智能”，公司专注“认知智能”研发，最终冀达至模拟人类情感及人格。是次合作研究将集中在语言分析及推理方面，连同将研究结果作知识转移成应用产品，如聊天机械人、阅读文件软件等，预计产品会首先应用于金融业界。科大工学院院长郑光廷表示，合作有助促进产学研交流，推动研究发展具前瞻的创新应用，“公司出题目，我们…	2019-04-09	明报	教育		562
粤语一字连系多语树形图	http://paper.wenweipo.com/2019/04/11/ED1904110004.htm		2019-04-11	文汇报	教育		2
老片教粤语 老外都赞好	http://paper.wenweipo.com/2019/04/11/ED1904110002.htm	教大语料库更新 查字兼睇电影片段 香港文汇报讯（记者 詹汉基）粤语是香港人的日常用语，其灵巧多变的助语词“?”、“啦”、“啩”等，令语言变得活泼有趣。不过，对外地人而言，不单是语气助词，粤语多变的字词结构，也是难以跨越的大山。香港教育大学的研究团队建立了全港首个“香港二十世纪中期粤语语料库”，让有兴趣的公众利用经典粤语长片，学习日常用语，甚至从中了解粤语的流变。 在粤语中，简单如“食饭”一词，已有很多姿态：食晚饭、食冷饭、食便饭，甚至是食拖鞋饭。 为了让非华语人士掌握粤语的字词结构，教大语言学及现代语言系副教授钱志安及研究小组，自2012年至今，获得研资局及校内拨款合共100万港元，建立全港首个“香港二十世纪中期粤语语料库”。 该项目自2012年展开，最新的版本将于本月下旬推出，用户只需输入汉字或粤语拼音，语料库即能列出与该字相关的词语、俚语，甚至是电影对话。 用户如输入“食”字，系统除…	2019-04-11	文汇报	教育		1288
输入70粤语长片百万字对白 教大粤语库增播片学例句	http://premium.mingpao.com/cfm/Content_News.cfm?Channel=gb&Path=168589931855/gfa1.cfm	【明报专讯】广东话灵活多变，外国人即使在书本上学过粤语字词，但想与本地人“同声同气”亦不容易，就如“啦”、“喎”等助语词，若日常生活用错，更会闹出笑话。香港教育大学语言学及现代语言系副教授钱志安近日扩大及更新“香港二十世纪中期粤语语料库”（语料库），加入电影片段、词类搭配和分析等功能，助非华语者学习广东话。 澳洲人研究助理“过来人”出主意 钱志安2012年开展本港首个语料库项目。他说，当时主要探讨古今广东话的分别，后来因澳洲人徐乐文加入团队，学习广东话的徐提出可善用语料库，加入更多功能，最新版本将于本月下旬推出。经两个阶段，团队一共翻看约70套由1947至1970年制作的粤语长片，将近100万字的对白输入语料库。项目先后获研究资助局及其他拨款资助，总额近100万元。 语料库有逾8000个词种，出现次数最多首三位是“我”、“你”、“呀”。新版设词类搭配功能， 举例输入“茶”字，可搜寻到“饮…	2019-04-11	明报	教育		1002
刘允获金像奖专业精神奖 介绍短片撑粤语俚语	http://hd.stheadline.com/news/columns/0/20190416/756940/	前晚全城最关注嘅系咩，梗系金像奖颁奖典礼，Kelly有睇直播，留意到获得专业精神奖嘅刘允，佢嘅介绍短片好有诚意，好有惊喜，因为内容力撑粤语，喺短片字幕加入咗广东话俗语，够晒贴地，仲要有埋拼音，等唔识广东话嘅人都可以尝试拼下学下。 呢段介绍刘允短片内嘅俚语，包括“濑野”、“顶硬上”、“摊摊腰”、“笑口噬噬”、“架势”、“搏命”同“冇停手”，真系睇词都感受到佢嘅演技好精采。 佢得奖嘅消息一出，好多人都好惊讶咁得知，原来佢系第一代郭靖白彪嘅细佬，虽然无哥哥咁出名，不过就系凭肯捱肯搏又无怨言嘅精神，获得业界一致认可零负评嘅吊威吔专家，香港动作电影八、九十年代喺国际间享负盛名，佢功不可没，佢得奖真系实至名归！ KellyChu	2019-04-16	头条日报	Executive日记	KellyChu	329
保育粤语呼声高 学者促纳正规课程	http://hd.stheadline.com/news/daily/hk/758924/	粤语是绝大部份港人的母语，近年随“普教中”等议题发酵，港人对推广粤语文化的关注度有所提升。有学界组织早前宣布将举办“粤音朗读测试”，百多个名额瞬间被抢清光，反应热烈；本月底亦有学者发布花数年时间编撰的最新版“粤语语料库”，助非母语学习者了解粤语词汇及运用。有学者认为，愈来愈多人重视粤语，惟本港中小学课程均没有教授粤语拼音，学生难掌握粤语的语音变化，冀教育局将其纳入正规课程。 有见香港缺乏具规模的粤语水平测试，香港语言学学会月初宣布，六月将首次举办“粤音朗读测试”，为参加者提供粤语水平认证。有份推动测试的香港城市大学翻译及语言学系副教授蔺荪指，学会早于三年前已开始为测试作准备，先后开会逾五十次，期望举办一个规范化的粤语测试，“汉语有HSK（汉语水平考试），英文也有TOEFL和IELTS，现在朗读试是第一步，希望认受性会逐步提高。” “粤音朗读测试”爆满 测试名额原订一百个，但首日接受报名已…	2019-04-26	头条日报	港闻		1478
消委会报告 视像面试讲粤语 外佣到职口哑哑	http://117.122.212.150/a.php?f=20190516/gw-41.txt	很多中产家庭都要聘外佣帮忙，奈何外佣中介质素参差，慎防有“伏”！消委会收到形形色色的投诉，有外佣在视像面试时“出猫”，令雇主相信她懂说懂听基本的广东话和英语；另有中介公司标榜“百分百退款”，但以多种藉口指未能安排外佣来港，却又不肯退款；有雇主先后签了三份约、前后花了六个月外佣才成功上班。消委会批评劳工处监管不力，建议处方积极“放蛇”调查，强调中介违反守则，可被钉牌及被起诉。\大公报记者 朱乐怡（文） 何嘉骏（图） 视像读拼音 对答如流 投诉人谭先生去年尾欲聘女佣，在中介公司挑选了一名自称有照顾婴儿经验、懂烹饪及广东话的印佣，视像会面时见印佣可用广东话对答，亦略懂英文单字，他遂以10980元落实聘请。岂料该印佣到职时判若两人，简单如“洗衫”、“煮饭”等字眼也不懂，就连在视像会面时问过的同一问题，她都不懂回答。谭追问下揭发内情，原来视像会面背后有显示器，即时替她翻译答案及附广东话拼音。谭向中…	2019-05-16	大公报	港闻		965
印佣视像见工 即时翻译扮识粤语 中介疑违守则 拒退万元收费	http://premium.mingpao.com/cfm/Content_News.cfm?Channel=gb&Path=168590808605/gga1.cfm	【明报专讯】消费者委员会过去两年每年接获约200宗有关外佣中介的投诉，有中介公司安排印佣与港人雇主视像会面“见工”，以确认其广东话及英语能力，有人却暗中安排即时翻译，制造女佣能以广东话简单对答的假象，至女佣到职后，雇主才发现货不对办，中介疑违反《职业介绍所实务守则》，惟即使消委会介入，中介也拒绝退还过万元收费。消委会促劳工处加强执法。有外佣雇主团体认为目前规管中介的守则未能充分保障雇主。 劳工处回应称一直严厉打击职业介绍所的违法行为，会在收到投诉后行动，自2014年至今年4月底，共检控37间外佣的职业介绍所，自2017年至2019年4月底，该处撤销、拒绝发出或续发共20间外佣职业介绍所的牌照，包括15间是因违反实务守则。 “百分百退款” 仅包未获签证 消委会过去两年每年约接获200宗有关外佣中介服务的投诉，多涉服务质素，有中介公司标榜“百分百退款”，但事主要求退款时，职员却搬出诸多理由，…	2019-05-16	明报	港闻		906
消委会报告\视像面试讲粤语 外佣到职口哑哑	http://www.takungpao.com.hk/news/232109/2019/0516/288282.html	图：消委会呼吁雇主光顾持牌及有良好口碑的中介公司，签约前亦要先了解合约内容 很多中产家庭都要聘外佣帮忙，奈何外佣中介质素参差，慎防有“伏”！消委会收到形形色色的投诉，有外佣在视像面试时“出猫”，令雇主相信她懂说懂听基本的广东话和英语；另有中介公司标榜“百分百退款”，但以多种藉口指未能安排外佣来港，却又不肯退款；有雇主先后签了三份约、前后花了六个月外佣才成功上班。消委会批评劳工处监管不力，建议处方积极“放蛇”调查，强调中介违反守则，可被钉牌及被起诉。\大公报记者 朱乐怡（文） 何嘉骏（图） 视像读拼音 对答如流 投诉人谭先生去年尾欲聘女佣，在中介公司挑选了一名自称有照顾婴儿经验、懂烹饪及广东话的印佣，视像会面时见印佣可用广东话对答，亦略懂英文单字，他遂以10980元落实聘请。岂料该印佣到职时判若两人，简单如“洗衫”、“煮饭”等字眼也不懂，就连在视像会面时问过的同一问题，她都不懂回答。谭追问…	2019-05-16 00:00:00	大公报	新闻		1008
粤语残片	http://117.122.212.150/a.php?f=20190612/tk-3.txt	许多年前，香港的电视午夜过后会播映一些香港人谓之“粤语残片”的电影。在这夜深人静的时段，可以想像电视机前的观众都是些失眠睡不着觉的人，否则谁会牺牲睡眠看这种“残片”？ 是真的残啊，屏幕上模模糊糊只有黑白两色，再加上一丝丝颤抖的白色线条，斜斜地像在下着雨，以致画面上的人影连脸形都看不清楚，就更遑论表情了。对白很慢，也不知是配音有问题还是本来的效果就是这样的。 那些年，或访友或中转或途经，我偶尔会在香港作短暂的停留。在下榻的酒店房间里，我喜欢在睡前开着电视阅读，读累了把视线移到屏幕上稍作“休息”。即使是这样，我也看了些残片，唤醒几许儿时的记忆——由母亲带着去电影院，看的就是这一类的粤语片，而且古装时装兼有，其中又以大锣大鼓又唱又做的居多。任剑辉、白雪仙、凤凰女、于素秋、吴君丽、林家声、梁醒波等等的名字，都是在那时候给记住了的。这些人都是母亲的偶像，是所谓的正印花旦王和大老倌。一出场必定伴随着…	2019-06-12	大公报	大公园	李忆莙	1269
“越语遇上粤语” 越女生醉心中文 “句末助词”变化万千 研究发音语意	https://paper.hket.com/article/2375323	越南的糭子是用蕉叶包裹的农历新年节庆食品，当地公众早已看不懂老建筑常见的汉字又或随之衍生的喃字，一切总跟中华文化似近还远。 中文大学唯一越籍研究生阮氏红贵没华裔血统，高中才学中文，一口台湾腔普通话却远比多数港人流利准确。多年来协助愈来愈多国人学好中文后，她深切希望能在港打从根本了解两地语言异同，尤其发音、表达跟越语极似的粤语。 “你去边度”何以要加上“呀”才不似质问，“(口架)喇”的次序怎么无法对调，母语讲者向来不假思索、语文教师往往难以解释的“句末助词”，是她的博士论文题目。 “世界上有语言，可能是完全没有句末助词。”阮氏红贵指英语正是典型代表，越南语跟同有六调的粤语属于不同语系，句末助词却都远比普通话多。只是，它们的确实意义不易掌握，教师要授课总有点束手无策，“一般是随文释义，或者避开不谈，等学习者学到高级水平之后就自然学会了。” 来港学习 语感仍有待改善 去年拿“香港博士研究生奖学…	2019-06-13	经济日报	要闻	姚沛镛	1643
港生问题粤语答 启动礼变“媒体会”	http://paper.wenweipo.com/2019/06/14/HS1906140044.htm	“河南的宣传部长是广东人哦，会讲广东话哦。”这一“粤牌豫部长”身份令香港学子兴奋不已。 学生们不停向他抛出问题，“你来河南工作之后对河南的印象有何改变”、“你觉得河南与广东、香港有什么可以互相借鉴的地方”、“河南政府会怎么鼓励年轻人在河南发展，留住人才”启动礼俨然变成了江凌部长的“答记者问”媒体会。 讲起广东话的江凌语速明显提升不少，他告诉团团围住他的港生，能够到不同文化、不同气候的区域多走一走，看一看，是很有意义的。 这样才能感受到国家的多样性，感受到国家的丰富与博大；又指河南可以从强化市场意识、开放意识等方面向广东、香港学习，而粤港则可借鉴河南人的“大格局”。 对于人才问题，江凌也给予了认真回答。他认为，地方有吸引力才能吸引人才，河南现在最着重的是如何改善城市环境及功能，另一方面则要为青年提供更多的就业和就业机会。“相对来说，河南会比更多条件优秀的城市提供更大力度推行政策。” 他指，…	2019-06-14	文汇报	香港专题		495
【反送中】“香港靠谁救”笔战：《隔着普通话与粤语的距离 答不到“香港有救吗？”》原文 13:54	https://china.hket.com/article/2386591	香港反《逃犯条例》修订风波震动全球的关键时刻，内地社交媒体疯传一篇题为《香港这座城市还有救吗？》，称“普通民众很容易被蛊惑”，内文不乏暗示香港“没得救”论调；文章获百万计点击，但也引来一些内地人撰文反驳，诸如网名“泫然亦然”的《请收起你的厌港症》、署名“北京评论员”的《隔着普通话与粤语的距离答不到“香港有救吗？”》，还有Kief《蠢的并不是香港青年》。 现将这场笔战中，各篇文章原文刊出。 北京评论员（又称濠江客）：《隔着普通话与粤语的距离 答不到“香港有救吗？”》 “我接触过很多香港青年，他们真的不是坏，他们只是蠢而已。”内地微信近日疯传一篇题为《香港这座城市还有救吗？》的文章，作者自称曾在香港读研究生，开篇便形容香港学生“幼稚病”、蠢，批评学生会“假民主”、港生不懂殖民历史，质素“不足以在一个大市场中与大陆青年竞争”。文章又指出，香港长久以来受西方价值观冲击，“普通民众很容易被蛊惑，上…	2019-06-27	经济日报	即时国情动向		4061
硅谷国际发明节教大包揽4奖项 粤语语料库夺金奖 15:27	https://topick.hket.com/article/2386667	香港教育大学团队首度参与美国硅谷国际发明节，3项教育科技项目共获4个奖项，夺得1金、2银及1个特别奖，今次是首次有本地大学参与该项展览并获得殊荣。 硅谷国际发明节刚于本月24日至26日在美国加州举行，教大研发项目范畴包括中文学习、写作修订追踪和游戏化训练，展示如何善用科技创造新的教育效果和体验。 教大团队凭数据为本的中文教学用粤语语料库，同时夺得金奖和特别奖，粤语语料库收录逾60套粤语长片中的对白，库藏80多万字，提供丰富的系统化数据，并配有片段翻看功能，为粤话中文的教学和研究，以至数码人文学的发展创立新平台。 学生对教师回馈之回应的自动化追踪系统则获得银奖，该系统以学习英语为外语的写作而设，可以自动分析、分类教师回馈及学生修订，并侦测两者之间的联系。 教大副校长（研究与发展）吕大乐祝贺获奖团队，说：“教大的团队能够在美国硅谷这被誉为是国际创新和科技摇篮的展览中获奖，实在令人鼓舞，证明教…	2019-06-27	经济日报	即时社会		471
【逃犯条例】外交部驻港特派员公署粤语发文撑警	http://www.stheadline.com/inews-content.php?cat=a&nid=129955	金钟添马公园今午举行撑警集会，大会宣布有约16.5万人出席。外交部驻港特派员公署下午亦在facebook以粤语发文，赞扬香港警察在专业和敬业精神方面当之无愧，由于他们的努力，令香港得以成为世界上最安全城市之一。 公署又说，警员在制服下是普普通通的子女、父母和兄弟姐妹，穿上制服，便放低喜怒哀乐，全身心为香港守法治、护安宁，值得尊敬、尊重。	2019-06-30	头条日报	即时港闻		176
【逃犯条例】外交部驻港特派员公署粤语发文撑警 18:15	http://std.stheadline.com/instant/articles/detail/1034173-%E9%A6%99%E6%B8%AF-%E3%80%90%E9%80%83%E7%8A%AF%E6%A2%9D%E4%BE%8B%E3%80%91%E5%A4%96%E4%BA%A4%E9%83%A8%E9%A7%90%E6%B8%AF%E7%89%B9%E6%B4%BE%E5%93%A1%E5%85%AC%E7%BD%B2%E7%B2%B5%E8%AA%9E%E7%99%BC%E6%96	金钟添马公园今午举行撑警集会，大会宣布有约16.5万人出席，警方表示有5.3万人。外交部驻港特派员公署下午亦在facebook以粤语发文，赞扬香港警察在专业和敬业精神方面当之无愧，由于他们的努力，令香港得以成为世界上最安全城市之一。 公署又说，警员在制服下是普普通通的子女、父母和兄弟姐妹，穿上制服，便放低喜怒哀乐，全身心为香港守法治、护安宁，值得尊敬、尊重。	2019-06-30	星岛日报	即时香港		187
外交部驻港特派员公署粤语发文撑警	http://news.wenweipo.com/2019/06/30/IN1906300034.htm	外交部驻港特派员公署粤语发文撑警(外交部驻港特派员公署FB截图) 【文汇网讯】大公文汇全媒体报道：香港金钟添马公园今日(30日)下午举行“撑警察、保法治、护安宁”撑警集会，大会早前宣布有约16.5万人出席。外交部驻港特派员公署下午亦在Facebook以粤语发文，赞扬香港警察在专业和敬业精神方面当之无愧，由于他们的努力，令香港得以成为世界上最安全城市之一。 公署又说，警员在制服下是普普通通的子女、父母和兄弟姐妹，穿上制服，便放低喜怒哀乐，全身心为香港守法治、护安宁，值得尊敬、尊重。 (大公文汇全媒体新闻中心供稿) 责任编辑：京辰	2019-06-30	文汇报	即时新闻		288
外交部驻港特派员公署粤语发文撑警	http://www.takungpao.com.hk/hongkong/text/2019/0630/312977.html	外交部驻港特派员公署粤语发文撑警。（外交部驻港特派员公署FB截图） 大公文汇全媒体报道：香港金钟添马公园今日（30日）下午举行“撑警察、保法治、护安宁”撑警集会，大会早前宣布有约16.5万人出席。外交部驻港特派员公署下午亦在Facebook以粤语发文，赞扬香港警察在专业和敬业精神方面当之无愧，由于他们的努力，令香港得以成为世界上最安全城市之一。 公署又说，警员在制服下是普普通通的子女、父母和兄弟姐妹，穿上制服，便放低喜怒哀乐，全身心为香港守法治、护安宁，值得尊敬、尊重。 （大公文汇全媒体新闻中心供稿）	2019-06-30 00:00:00	大公报	文章		270
驻港公署粤语贴文致敬香港警察	http://www.takungpao.com.hk/news/232109/2019/0701/313028.html	【大公报讯】外交部驻港特派员公署昨日在社交平台以粤语发出贴文，致敬香港警察，为警队加油打气。 贴文指出：“专业和敬业精神一直都系香港人引以为傲嘅质素。呢方面，香港警察系当之无愧！因为佢哋嘅努力，香港得以成为世界上最安全嘅城市之一。制服下，佢哋亦系普普通通嘅子女、父母和兄弟姐妹。着上制服，佢哋放低喜怒哀乐，全身心为香港守法治、护安宁，好值得我哋尊敬、尊重！我哋衷心咁讲一句：多谢各位阿Sir、Madam！辛苦晒！加油啊！”	2019-07-01 00:00:00	大公报	新闻		218
示威语言艺术 粤语赤裸传神	http://premium.mingpao.com/cfm/Content_News.cfm?Channel=ja&Path=202310864106/vsa2.cfm	【明报专讯】标语、口号，甚至咒骂在社会运动每秒上演。香港笔会将举行研讨会，剖析粤语在香港民主运动的特色及作为有力工具。其中一名讲者、浸会大学语言学教授黄良喜接受访问时表示，粤语为港人日常用语，无论雨伞运动还是今次“反送中”运动，粤语是主要载体语言。同时，于示威场面不难看到英语，今次全球登报也显示了港人运用多种语言。政府月来不肯“撤回”，只以“暂缓”修订来回应市民，他指出市民对用字及背后意思更为执著，坚拒含糊：“政府似乎以为玩弄舆论，修饰言词就能瞒天过海，这也是不聪明的。”口号方面，黄良喜认为整体感觉词锋到位，例如“不撤不散”、“你缓我缓”、“200万+1、2、3人”。网上文宣、留言等善用口语之妙，例如批评指出“速龙小队”制服无编号，旋即有回应港姐港男泳装都带编号，“得咁少布都有位『啵』”。他说：“这次粤语的使用很赤裸，有一种骂我什么『自由器官』都可以，但是『撤回』就必须是『撤回』，不可以…	2019-07-05	明报	文化力场		804
粤语武侠剧热爆海外 演艺显实力吸优质生	http://www.takungpao.com.hk/news/232109/2019/0705/315115.html	图：演艺学院以广东话演绎武侠剧作《我自在江湖》\演艺学院提供 【大公报讯】记者汤嘉平报道：DSE放榜之际，不少学校为延揽人才各显身手。香港演艺学院则选择用实力说话，于两周前首次到访英国皇家戏剧艺术学院作交流演出，并以广东话演绎古代武侠剧作《我自在江湖》，得到观众的热烈反响。香港演艺学院戏剧学院院长潘惠森表示，自己在创作时看重人文精神流露，学生在演戏时，亦应注重对剧本背景的探索，例如历史文化。他透露近年报读戏剧学院的学生愈来愈多，多数考生并非一次就过，有的甚至考近十次都不一定被取录。 金庸武侠小说《倚天屠龙记》是无数人曾经爱不释手的那本书。小说的最后，张无忌给爱人赵敏画眉，却在窗上望见旧爱周芷若的面容，故事在此处戛然而止，引人无数遐想和深思。潘惠森说，他的剧作《我自在江湖》，便从这结局开始。潘惠森说，整部戏想与观众探讨的，便是“自在”二字。江湖只是个比喻，我们现在的生活和工作中，只要和人打…	2019-07-05 00:00:00	大公报	新闻		843
津港高铁首发 “动姐”练粤语	http://117.122.212.150/a.php?f=20190711/zm-25.txt	【大公报讯】记者张聪天津报道：10日上午，天津西至香港西九龙的G305次复兴号列车从天津西站出发，至此京津冀三地实现进港高铁列车的全覆盖，雄安新区与香港特别行政区实现高铁直通。 除终点站香港西九龙站外，G305次复兴号列车中途停靠河北境内的雄安新区白洋淀站、石家庄站和邯郸东站，以及郑州东、武汉、长沙南、广州南、深圳北、福田等热门车站，全程2450千米，运行仅需10小时左右，每天一班，全程二等座票价1092.50元人民币。 列车首发仪式上，G305列车上特别准备了以“月季紫荆相辉映，海河香江一日达”为主题的特别活动，庆祝天津西至香港西九龙高铁列车首发，并通过“首日封”的纪念形式，为列车上的幸运旅客留下一份特殊的礼物。 津港高铁首发列车的列车长王晶告诉记者，为了更好服务旅客，京港高铁的每一位乘务人员学习了应急处置预案和规章制度。“香港讲粤语。上岗前，我们专门进行了粤语培训，努力用旅客舒适的沟…	2019-07-11	大公报	中国		470
津港高铁首发 “动姐”练粤语	http://www.takungpao.com.hk/news/232108/2019/0711/317769.html	【大公报讯】记者张聪天津报道：10日上午，天津西至香港西九龙的G305次复兴号列车从天津西站出发，至此京津冀三地实现进港高铁列车的全覆盖，雄安新区与香港特别行政区实现高铁直通。 除终点站香港西九龙站外，G305次复兴号列车中途停靠河北境内的雄安新区白洋淀站、石家庄站和邯郸东站，以及郑州东、武汉、长沙南、广州南、深圳北、福田等热门车站，全程2450千米，运行仅需10小时左右，每天一班，全程二等座票价1092.50元人民币。 列车首发仪式上，G305列车上特别准备了以“月季紫荆相辉映，海河香江一日达”为主题的特别活动，庆祝天津西至香港西九龙高铁列车首发，并通过“首日封”的纪念形式，为列车上的幸运旅客留下一份特殊的礼物。 津港高铁首发列车的列车长王晶告诉记者，为了更好服务旅客，京港高铁的每一位乘务人员学习了应急处置预案和规章制度。“香港讲粤语。上岗前，我们专门进行了粤语培训，努力用旅客舒适的沟…	2019-07-11 00:00:00	大公报	新闻		470
驻军防暴演练 粤语高喊：后果自负	http://orientaldaily.on.cc/cnt/news/20190802/00176_011.html	反修订《逃犯条例》风波争议持续未平，香港近两个月来多次出现大型游行皆演变成冲突收场。解放军驻港部队前日（7月31日）在社交网站发布新宣传片介绍部队工作，当中画面包括军事及防暴演练，最特别是有驻港部队人员以广东话高叫“后果自负”，而且有人员在行动演练中举起红旗，要求停止冲击。外交部昨日回应宣传片时表示，支持香港特区政府严惩暴力犯罪分子。 宣传短片 强调维护一国两制 驻港部队的宣传短片长约三分钟，内容分为反恐、维稳、防卫及同心，而在包括反恐演练的片段当中，不乏香港本地元素。驻港部队发贴指出，部队是国家主权的主要体现，是维护一国两制的重要力量，是维护香港繁荣稳定的重要基石。 有关反恐演练的片段内容，显示部队人员从直升机游绳而下，到模拟城市民居的场地执行任务；在部队人员持枪巡视时，镜头拍到一辆废弃新界的士，画面其后展示出能调校角度的枪枝，让人员可准备攻击敌方，在确认情况后开枪出击，其中一名人员在…	2019-08-02	东方日报	港闻		846
教大扬威国际发明节 粤语语料库夺金奖	https://skypost.ulifestyle.com.hk/article/2387141/	香港教育大学团队本月24日至26日期间，首度参与美国硅谷国际发明节，并凭3项教育科技项目，获得4个奖项，是首次有本地大学参与该项展览并获得殊荣。其中一个以数据为本、收录逾60套粤语长片中的对白，库藏80多万字的中文教学用粤语语料库，更分别夺得金奖及特别奖。 夺得金奖及特别奖的粤语语料库，提供丰富的系统化数据，并配有片段翻看功能，为粤话中文的教学和研究创立一个新平台。教大研发发明亦透过作修订追踪和游戏化训练等项目夺得2个银奖。教大副校长（研究与发展）吕大乐教授祝贺获奖团队，并指教大的专家将继续推动创新，提出结合科技与教育的新意念。	2019-06-28	晴报	港闻		272
携手外闯 筹备湾区影视联盟 推粤语片“出海”	http://117.122.212.150/a.php?f=20200115/jj-75.txt	刚刚签署的CEPA修订协议进一步放宽了香港人员参与制作的比例限制，为香港电影人北上提供了更多机会；澳门一直积极推动电影及文化创意产业发展。湾区电影产业的发展除了政府产业政策引导，市场机制同样重要。广东省粤港澳合作促进会监事长、文化传播委员会主任白玲表示，正筹备成立大湾区影视艺术联盟，为粤港澳三地搭建一个合作平台，携手助力大湾区优秀影视作品“出海”。 广东省有悠久的电影文化传统，早期像《羊城暗哨》、《跟踪追击》、《秘密图纸》等一大批反特电影曾经创造出很高的观影人次。同样，港产片曾经创造横扫亚洲的辉煌，享有“东方荷里活”美誉。而后起之秀的澳门，自2016年开办澳门国际影展暨颁奖典礼后，一直积极推动澳门电影及文化创意产业发展。 在广东省电影公司总经理赵军看来，目前粤港澳三地电影产业小、散、乱的状态，需要更多政策的扶持和整合。不过，珠江传媒股份董事长张海燕认为，目前粤港澳电影产业已具备融合发展的…	2020-01-15	大公报	经济		919
世纪．不欢而谈：《野狼Disco》没有侮辱粤语，但也肯定不是在致敬	http://premium.mingpao.com/cfm/Content_Column.cfm?Channel=vx001&Path=202405172346/vx001b.cfm	【明报文章】陈伟霆与内地歌手宝石Gem合作的《野狼Disco》，因画面猎奇，已引起不少讨论。舞台上陈伟霆身穿发光金黄色西装，拿一支假玫瑰，唱着每个字都不合字音的粤语，请观众与他一起在左边画龙、右边画彩虹。影片很快爆红，陈奇怪的唱腔和夸张舞姿被不少人耻笑，引来大量讨论。 对这首歌的文化背景，文化评论者阿果在日前的“星期日生活”专栏中就介绍，《野狼Disco》反映九十年代初东北青年受香港流行文化薰陶的成长经历，“『唔啱音』的广东话内容，和表演中模仿郭富城『对你爱不完』的经典手势一样，算是原唱者对港式流行的致敬，而非贬损。”教师黎明在脸书上也从八九十年代东北的娱乐封禁，与“土”“俗”的文化失落说起，认为歌曲体现东北基层青年的日常。迪厅寄情，有些土鳖，却苦中作乐，是“对粤语流行文化带着怀旧和憧憬”。 评论似乎对网民嘲笑歌曲和表演这件事特别愤慨，认为这些批评在指控《野狼Disco》侮辱粤语，并相信…	2020-01-17	明报	作家专栏	文．杨不欢	1713
粤语贺年歌爱旧厌新	http://stepaper.stheadline.com/news_content.asp?newsid=E01133.txt&newscat=E&newsdate=2020-01-24	唱了超过四十年的《财神到》：“财神到，财神到，好走快两步，得到佢睇起你，你有前途。”，伴随着同于上世纪七十年代创作的《欢乐年年》、《迎春花》等，雄霸粤语贺年歌类别多年，今时今日仍然在播、仍然在听，究竟是新不如旧，还是根本没人打算挑战此类贺年神曲的地位？ 文：Dicky 插画：Dicky 部分图片：新华社、星岛图片库 勇夺金唱片殊荣 据本地资深粤语歌曲评论人黄志华研究，最早而又红极一时的粤语贺年歌，应该是上世纪五十年代，由粤剧花旦郑帼宝主唱的《恭喜发财》。“恭喜你，恭喜你，大把生意，丰足收获笑嘻嘻，发展富源万倍利……”，此曲改编自广东小曲《十八魔》，词则由鲁试填写，是当年极受欢迎的广东歌。1973年，风行唱片公司创办人钟锦沛有意炮制一张贺年专辑，并找来粤剧名伶文千岁及花旦李宝莹翻唱此曲，但歌词由著名作曲家、填词人兼编剧庞秋华重新填写，更将歌名改为《恭喜你》，收录于《大家恭喜》专辑内。 上世…	2020-01-24	星岛日报	副刊		1979
港澳台明星与央视主持人联袂：粤语劲曲《坚信爱会赢》！	http://www.hkcd.com/content/2020-02/14/content_1178482.html	【香港商报网讯】歌曲《坚信爱会赢》由中央广播电视总台文艺节目中心和港澳台节目中心联合制作，由梁芒作词，舒楠作曲。歌曲邀请了内地与港澳台地区歌手演员，包括任达华、钟镇涛、惠英红、莫华伦、张卫健、张明敏、刘恺威、陈伟霆、黄轩、郭采洁、夏利奥、马国明，以及总台大湾区之声的主持人陈星、倪升、海同一起演唱。歌曲采用朋友圈的包装方式，清新、走心，贴合新时代的新媒体传播属性。由于是特殊时期，大家均采用“云录制”的方式，按照导演组的要求各自在家录音录像，最后发到导演组合成。 曲作者舒楠曾经提到过：谨以此歌献给2020身处疫区一线的人们，中国有难一起扛。我们导演组挑选这首歌曲，是因为觉得这首歌曲体现了人间大爱，体现了爱能超越一切，体现了所有人携手共渡难关的信心和决心。 在今天这个特殊的日子，港澳台众明星与中央广播电视总台粤语主持人们联袂推出粤语劲曲《坚信爱会赢》，为武汉加油，为中国祝福！	2020-02-14 00:00:00	香港商报	最新报道		402
港澳台明星与央视主持人联袂：粤语劲曲《坚信爱会赢》！	http://www.hkcd.com/content/2020-02/14/content_1178482.html	【香港商报网讯】歌曲《坚信爱会赢》由中央广播电视总台文艺节目中心和港澳台节目中心联合制作，由梁芒作词，舒楠作曲。歌曲邀请了内地与港澳台地区歌手演员，包括任达华、钟镇涛、惠英红、莫华伦、张卫健、张明敏、刘恺威、陈伟霆、黄轩、郭采洁、夏利奥、马国明，以及总台大湾区之声的主持人陈星、倪升、海同一起演唱。歌曲采用朋友圈的包装方式，清新、走心，贴合新时代的新媒体传播属性。由于是特殊时期，大家均采用“云录制”的方式，按照导演组的要求各自在家录音录像，最后发到导演组合成。 曲作者舒楠曾经提到过：谨以此歌献给2020身处疫区一线的人们，中国有难一起扛。我们导演组挑选这首歌曲，是因为觉得这首歌曲体现了人间大爱，体现了爱能超越一切，体现了所有人携手共渡难关的信心和决心。 在今天这个特殊的日子，港澳台众明星与中央广播电视总台粤语主持人们联袂推出粤语劲曲《坚信爱会赢》，为武汉加油，为中国祝福！	2020-02-14	香港商报	即时新闻		410
中央广播电视总台粤语劲曲《坚信爱会赢》在港澳地区引起高度关注	http://www.hkcd.com/content/2020-02/16/content_1178658.html	【香港商报网讯】近日，由中央广播电视总台制作，中央广播电视总台粤语主持人联合港澳台众明星联袂演唱的抗击疫情歌曲《坚信爱会赢》粤语版在港澳地区热播，歌曲引发港澳民众热烈反响，鼓励人们齐心协力共同战胜疫情。 歌曲《坚信爱会赢》由中央广播电视总台制作，梁芒作词，舒楠作曲。歌曲邀请了内地与港澳台地区歌手演员，包括任达华、钟镇涛、惠英红、莫华伦、张卫健、张明敏、刘恺威、陈伟霆、黄轩、郭采洁、夏利奥、马国明，以及总台大湾区之声的主持人陈星、倪升、海同一起演唱。歌曲采用朋友圈的包装方式，清新、走心，贴合新时代的新媒体传播属性。 《坚信爱会赢》粤语版日前在香港、澳门地区多家主流媒体播出，包括香港无线电视旗下的翡翠台、J2台、新闻台、明珠台以及财经资讯台。 此外，香港有线电视台、香港Now TV下属全频道、大公文汇集团旗下重点平台《大公报》《大公网》《文汇网》等网络平台以及新媒体平台《点新闻》都转发了歌曲…	2020-02-16 00:00:00	香港商报	最新报道		1116
【缘聚香江 中联办员工之窗】小罗学粤语	http://paper.wenweipo.com/2020/02/20/HK2002200063.htm	教育科技部 罗昊 转眼间，我从北京来港工作已四个多月了。初来乍到，香港和北京的文化差异扑面而来，环境、语言、饮食这其中，感受最突出的还是语言的差异。语言是人们沟通交流的桥梁，学好本地语言，是融入本地的最好媒介。上班第一天开始，我就下定决心要学会讲粤语。 我是土生土长的北京人，80后，四合院儿里出生，胡同儿里长大。八九十年代，正是香港流行文化的黄金时期，少年时期的美好记忆除了香港影视剧，还有粤语流行歌曲，即使听不懂歌词，也能感受到粤语歌曲中的别样儿味道，或婉转悠扬，或荡气回肠，既有表达不懈奋斗逆境自强之香港精神的《狮子山下》，又有诉说儿女情长之婉转细腻的《万水千山总是情》。粤语多变的声调本身就像一曲起伏的旋律，最适宜表达情感的跌宕和内涵。年少时的我被这种和普通话完全不一样的曲风深深吸引，如果身边有小伙伴们能够哼唱几句粤语歌，简直觉得他好了不起。从那时起，我心里便埋下了对于粤语好奇和向往的种…	2020-02-20	文汇报	港闻		1818
食店限粤语侍客 平机会：或属间接歧视	http://std.stheadline.com/daily/article/detail/2156551	（星岛日报报道）有食店早前以防疫为由，在网上宣称暂不招待操普通话人士，被指涉嫌歧视，遭平机会致电提醒后，该店近日在门外张贴告示，辩称职员“只懂广东话……唔识多国语言”，强调只会用粤语为食客服务，似暗示仍不招待内地人。平机会指出，因语言让某种族群体蒙受不利，或属间接歧视。 上月底一家拥有多家分店的冰室，在社交网站声称“洗太平地”，宣布“只招待香港人，落单时只限粤话及英语，一概普通话，暂不招待”，但欢迎台湾食客，帖文引来平机会注意，致电提醒该店或有机会触犯《种族歧视条例》，冰室随后再在社交网站辩称，与各区经理了解后，“发现全部伙计都唔识讲普通话，更加唔识用普通话解释餐牌”，决定“伙计落单只能够用广东话，亦唔会解释餐牌意思”。 记者昨日再到涉事冰室位于旺角花园街的分店了解，发现食店招牌被红纸遮盖，橱窗仍张贴写有“本店职员只懂广东话，亦不会解释餐牌”告示，又注明“细细个唔读书，搞到唔识多国语言”…	2020-02-23	星岛日报	港闻		762
刘德华唱粤语歌曲为医护人员“疫”境打气	http://www.hkcd.com/content/2020-02/24/content_1179880.html	【香港商报网讯】天王刘德华演唱粤语歌《我知道》为医护人员“疫”境打气。歌曲改编自原曲《爱的桥梁》，华仔亲自填上新词主唱，最重要是唱粤话，香港的医护人员，收到这份心意啦！（记者 木子）	2020-02-24 00:00:00	香港商报	热门推荐		93
愿光荣归粤语片	https://news.mingpao.com/pns/%e4%bd%9c%e5%ae%b6%e5%b0%88%e6%ac%84/article/20200322/s00018/1584815460441/%e9%a1%98%e5%85%89%e6%a6%ae%e6%ad%b8%e7%b2%b5%e8%aa%9e%e7%89%87	【明报文章】“愿光荣与粤语片同在，耻辱与粤语片绝缘”，这是一百六十四位香港粤语片工作者发出的誓言。但并非发生于粤语片极度低迷的今时今日，而是七十一年前一九四九年初，那时大陆仍属中华民国，尚未成立中华人民共和国。 卢伟力着《香港粤语片艺术论集》去年七月出版，我在烽烟四起之际“冒险”观看他编剧的《布莱希特．周恩来．二三事》舞台剧时，获他赠送此书，谢谢。书中细述这两句誓言的背景，因为四十年代末很多国语影人南下香港，港产国语片兴起，摄制规模和文化水准较高，粤语片则颇多迎合街坊通俗趣味，常被“进步”人士称为落后、有毒。 粤语影坛有志之士要改革粤语片，于是作出上述誓言，发起“清毒运动”，拍出《珠江泪》，称为“时代的真实感，革命性代表作”。竟然和现在抗争派的“时代革命”标语和《愿荣光归香港》歌曲有些相近。 不过，两者立场天差地别。当年粤语片改革派往往爱国左倾，书中说拍出创业作《珠江泪》的南国公司甚至由…	2020-03-22	明报	时代	石琪	568
不满封杀粤语 网红怒斥荒谬宣布退出抖音 12:17	https://std.stheadline.com/realtime/article/1877066/%E5%8D%B3%E6%99%82-%E4%B8%AD%E5%9C%8B-%E4%B8%8D%E6%BB%BF%E5%B0%81%E6%AE%BA%E7%B2%B5%E8%AA%9E-%E7%B6%B2%E7%B4%85%E6%80%92%E6%96%A5%E8%8D%92%E8%AC%AC%E5%AE%A3%E5%B8%83%E9%80%80%E5%87%BA%E6%8A%96%E9%9F%B3	近日在广东，有许多抖音粤语主播被抖音封锁帐号，其中一名拥有逾460万粉丝的抖音网红，怒斥抖音平台落後及非常荒谬，宣布退出抖音平台。 近日内地传媒传出抖音平台疑似禁止平台主播使用广东话作为主要语言，许多网民传出抖音开始禁止用粤语直播。其中一名於抖音平台上坚持使用粤语创作的网红“广东靓仔风少”，近期已甚少直播或上载影片。上月30日以短片解释指因抖音平台对粤语主播作出限制，显然落後。纵使抖音有功能自动为粤语语音配制字幕，但封锁粤语主播帐号时竟以“无法识别语言”作为理由，他怒斥理由非常荒谬。 网红不满抖音疑禁粤语直播点击图辑： 有风少之称网红怒骂抖音平台指不能识别粤语。网图 有人向抖音查询是否禁封粤语直播。网图 客服亦建议多用普通话直播。网图 有网红认为是抖音歧视粤语。网图 广东话主播直播时被抖音平台通知要尽量说普通话。网图 他指，大多数广东网民及粤语优势，指使用粤语人数逾亿，比很多国家的人口还…	2022-10-04	星岛日报	即时中国		826
不满封杀粤语网红怒斥荒谬宣布退出抖音12:17	https://hd.stheadline.com/news/realtime/chi/2377066/即時-中國-不滿封殺粵語-網紅怒斥荒謬宣布退出抖音	近日在广东，有许多抖音粤语主播被抖音封锁帐号，其中一名拥有逾460万粉丝的抖音网红，怒斥抖音平台落後及非常荒谬，宣布退出抖音平台。 近日内地传媒传出抖音平台疑似禁止平台主播使用广东话作为主要语言，许多网民传出抖音开始禁止用粤语直播。其中一名於抖音平台上坚持使用粤语创作的网红“广东靓仔风少”，近期已甚少直播或上载影片。上月30日以短片解释指因抖音平台对粤语主播作出限制，显然落後。纵使抖音有功能自动为粤语语音配制字幕，但封锁粤语主播帐号时竟以“无法识别语言”作为理由，他怒斥理由非常荒谬。 网红不满抖音疑禁粤语直播点击图辑： 有风少之称网红怒骂抖音平台指不能识别粤语。网图	2022-10-04	头条日报	即时中国		309
粤语片与港产片	https://news.mingpao.com/pns/%e4%bd%9c%e5%ae%b6%e5%b0%88%e6%ac%84/article/20200412/s00018/1586628560104/%e7%b2%b5%e8%aa%9e%e7%89%87%e8%88%87%e6%b8%af%e7%94%a2%e7%89%87	【明报文章】卢伟力着《香港粤语片艺术论集》，是出色的研究着作。 该书研究范围是上世纪五六十年代，正是香港粤语片黄金时期，那二十年合计拍了三千多部，产量惊人。但一九七○年左右大大减产甚至停产，可以说旧粤语片“死了”。 一九七三年《七十二家房客》使粤语对白的电影复苏，还打垮港产国语片，不过和旧传统大有不同。正如卢伟力指出，旧粤语片注重中国传统文化和华南民间特色，七十年代本土文化渐渐发展，新粤语对白片便“近香港而远华南”，由“粤语片”转化为“港产片”。 事实上，近五十年来，愈来愈多香港人不再认同广东人、中国人。 很佩服卢伟力找到六七十年前大量粤语片，认真观看，仔细分析，连新马仔与邓寄尘合演的“两傻”笑片也详加论述。书中专论了中联、左派电影和卢敦、旧黄飞鸿系列、李铁的写实片和戏曲片，以及任剑辉、红线女的表演艺术，还研究了粤语文艺片改编曹禺话剧，早过亦多过大陆。 压轴篇研究《如来神掌》，细述龙剑飞…	2020-04-12	明报	时代	石琪	585
世纪．叛逆有时：粤语流行音乐的真正崛起 许冠杰——港产电影歌曲第一功臣（续）	https://news.mingpao.com/pns/%e4%bd%9c%e5%ae%b6%e5%b0%88%e6%ac%84/article/20200418/s00018/1587148488925/%e4%b8%96%e7%b4%80-%e5%8f%9b%e9%80%86%e6%9c%89%e6%99%82-%e7%b2%b5%e8%aa%9e%e6%b5%81%e8%a1%8c%e9%9f%b3%e6%a8%82%e7%9a%84%e7%9c%9f%e6%ad%a3%e5%b4%9b%e8%	【明报文章】作者于昨日文章提出两点，论说许冠杰如何在七十年代突破前人，开新风气，一面唱出新本土声音，一面打开港产片电影歌曲的新天，开创以“片头”主题曲为电影定调，为作者电影创作主题曲，反映驳杂文化和之间的张力，今日继续从曲式与七十年代流行音乐方面进一步探讨。 许冠文多次在访问提及，他当导演，是因为可以把自己的世界观，透过有力的电影媒体，影响世界。许氏兄弟的四部七十年代作品，无论就电影主题与风格，均环绕着上述对“小市民／打工仔”的关注，是许冠文的“作者作品”；至于四首主题曲，也贯穿有关命题，是名副其实的作者电影与作者主题曲。然而，除可供文字与语言解读的歌词以外，音乐的类型、配器与演绎，配合电影，其实也发挥着强大的化学作用。 广东“乐与怒”：新时代音乐的主导动机 Ronald Rodman提出了把流行音乐作“主导动机”（leitmotif）放在电影里考量，他针对九十年代两部西方电影，美国的《…	2020-04-18	明报	作家专栏	文．罗展凤／编辑．关晓阳	4175
负暄集\学粤语\赵 阳	http://www.takungpao.com.hk/culture/237141/2020/0429/442849.html	周日晚上，和朋友通电话聊得正酣，忽然发现已经八点，赶紧跟朋友说了句“要上课”便匆匆收线。打开ZOOM，进入教室，老师的粤语发音立即声声入耳：“叉烧包，口型要张大，声音要响亮！”一众人在线上跟读：“叉~烧~包~”一遍又一遍，我听着听着，口水几乎要流出来。这一节课讲香港的美食。我赶紧加入学习，生怕落后。 疫情期间，公司策划了一个线上的粤语培训课程，每周二和周日两个晚上，每次九十分钟。报名参加的同事都是内地来港工作多年，比如我，来了五年多，但粤语水平还停留在“识听唔识讲”的阶段。公司给了四十个学员名额，几分钟就被抢光。同事小刘说，“在香港工作和生活，不会讲粤语，除了因为沟通问题带来的各种不方便，也还可能会失去很多交往的机会。”这话不假。他一直很想找个香港女孩结婚，但最后分手的原因都跟他不会讲粤语有关。甚至有一个女孩告诉他：“就算我同意和你拍拖，我家里人都不会同意。因为一家人围坐一起吃饭聊天，你…	2020-04-29 00:00:00	大公报	艺文		721
推广粤语达人阿择 打唔赢定打完仗 粤语都未使救亡	https://news.mingpao.com/pns/%e5%89%af%e5%88%8a/article/20200510/s00005/1589048677441/%e6%8e%a8%e5%bb%a3%e7%b2%b5%e8%aa%9e%e9%81%94%e4%ba%ba%e9%98%bf%e6%93%87-%e6%89%93%e5%94%94%e8%b4%8f%e5%ae%9a%e6%89%93%e5%ae%8c%e4%bb%97-%e7%b2%b5%e8%aa%9e%e9%83%bd%e6%	【明报专讯】“点会系打完仗呀，都唔顺口﹗”“打唔赢点会仲返到屋企呀﹗”电视节目主持吹水之间，提及童谣“大笨象，揸支枪，去打仗”的都市传说，港岛人会接“打完仗，返嚟食碗辣椒酱”，新界及九龙人却说“打唔赢”才食辣椒酱，一时之间引起如几年前“蓝黑/白金裙”的热烈讨论，两派阵营对另一个说法都难以置信。 读语言学出身的刘择明（阿择）见大家闹到不可开交，与朋友语言学研究生Matthew立即发起网上问卷调查，Matthew主力定问题，阿择学连登标题出post【“打唔赢”定系“打完仗”？全港终极万人大调查！要人！】，不到一天半，已收集到1.2万答复。有人说这是无聊事认真做的范例，阿择这样看：“拗一个问题系无聊，但关心自己嘅语言就唔系无聊”，“过去几年大家常说粤语要死了，冇?喇，今次就告诉大家，唔系，有排都未死。如果有一日你讲大笨象，细路问你大笨象系咩？这个语言便真的需要保育。我们要做的不是保育，而是多推…	2020-05-10	明报	副刊		4759
学粤语	https://news.mingpao.com/pns/%e4%bd%9c%e5%ae%b6%e5%b0%88%e6%ac%84/article/20200521/s00018/1589999668014/%e5%ad%b8%e7%b2%b5%e8%aa%9e	【明报文章】公司是中资，八成以上员工内地外派来港。疫情持续、业务委靡，公司不想人閒着，一纸通知：凡来港不足五年，且母语非白话者，均须参加粤语培训班。老板亲自动员：“讲好广东话，香港是我家。” 于是，每课九十分钟、每周两课的安排，让公司的粤语氛围一时间蔚然成风。虽然，大多时候是“鸡同鸭讲”，本地职员或是听到头痛或是根本听不懂。比较特别的是，有个姓刘的女同事，国内某名校毕业，堪称学霸，培训班发的教材以及老师布置的打卡练习内容，她都讲得很好。转眼两个月课程结束，考试那天，有一道题目是“香港最近的一则新闻”，要求做两分钟演讲。刘同学胸有成竹地按照书本上的某些段落背诵出来，老师立即喊停，要她一定要像平日聊天一样说一段“真正的新闻”。 刘同学叫苦：我来香港就是赚钱的，谁关心这地方有什么鬼新闻？若不是疫情，我早上从深圳来晚上回深圳去，这里的新闻与我何干？ 所以，老板那句话应该是：若无真感情，学了粤语有…	2020-05-21	明报	时代	晓燊	532
港人多带“基因型TT” 对粤语声调灵敏	http://paper.wenweipo.com/2020/05/29/HK2005290048.htm	（记者 高钰）语言是人类文明的沟通桥梁，其演化原来亦与基因密切相关。中文大学的跨学科研究发现，七成以广东话为母语的港人带有“基因型TT”，天生具较高的广东话声调感知能力，提供直接证据，说明广东话作为“声调语言”的特性，即同一发音高低调展示不同字意，很可能是由华人相关基因所决定。研究团队未来亦考虑就普通话及其他“声调语言”进行同类研究，为基因影响语言演化的假设确立更多证据。 全球已知的语言超过7,000种，包括9声的广东话、4声的普通话等都属于“声调语言”，即同一发音的高低声调展示不同字意，而撒哈拉以南的非洲、东南亚国家也有不少语言属“声调语言”。而包括英语等多项语言，则未有以音高辨义，有关情况一直是语言学研究及争议焦点之一。 中大揭语言演化之谜 中大大脑与认知研究所所长黄俊文的团队，成功结合基因学研究，为此提供新的解释证据。团队于本地招募超过400名以广东话为母语的测试者参与研究，为他们…	2020-05-29	文汇报	港闻		778
陈建华辞去广州市人大常委会主任职务 提倡保护好“粤语”	http://www.hkcd.com/content/2020-06/10/content_1196973.html	【香港商报网讯】记者 黄裕勇 报导：6月7日上午，广州市十五届人大五次会议召开第二次全体会议。会议决定，接受陈建华辞去广州市第十五届人大常委会主任职务。 广州市十五届人大五次会议第二次全体会议于6月7日上午举行 据悉，陈建华，1972年12月参加工作，曾在北京钢铁学院机械系冶金机械专业学习，并任职于广东省韶关钢铁厂；1984年11月转任广东省委办公厅；1998年后先后出任广州市委常委、从化市委书记；广州市委常委、宣传部部长；河源市委书记、市人大常委会主任；2011年12月返回广州，出任广州市委副书记、副市长、代市长；2012年1月后就任广州市市长；2016年2月任广州市人大常委会主任、党组书记。 今年2月，原汕尾市委书记、市人大常委会主任石奇珠已接替陈建华任广州市人大常委会党组书记职务。 关注粤港澳大湾区粤语传承 作为一位长期在广州任职，并高度关注本地民生的政府官员，陈建华在本次人大会议…	2020-06-10 00:00:00	香港商报	今日关注		751
陈建华辞去广州市人大常委会主任职务 提倡保护好“粤语”	http://www.hkcd.com/content/2020-06/10/content_1196973.html	【香港商报网讯】记者 黄裕勇 报导：6月7日上午，广州市十五届人大五次会议召开第二次全体会议。会议决定，接受陈建华辞去广州市第十五届人大常委会主任职务。 广州市十五届人大五次会议第二次全体会议于6月7日上午举行 据悉，陈建华，1972年12月参加工作，曾在北京钢铁学院机械系冶金机械专业学习，并任职于广东省韶关钢铁厂；1984年11月转任广东省委办公厅；1998年后先后出任广州市委常委、从化市委书记；广州市委常委、宣传部部长；河源市委书记、市人大常委会主任；2011年12月返回广州，出任广州市委副书记、副市长、代市长；2012年1月后就任广州市市长；2016年2月任广州市人大常委会主任、党组书记。 今年2月，原汕尾市委书记、市人大常委会主任石奇珠已接替陈建华任广州市人大常委会党组书记职务。 关注粤港澳大湾区粤语传承 作为一位长期在广州任职，并高度关注本地民生的政府官员，陈建华在本次人大会议…	2020-06-10	香港商报	即时新闻		759
【恒大清思】粤语历史悠久 先秦保留至今	http://paper.wenweipo.com/2020/06/12/ED2006120010.htm	有人误以为粤语粗鄙，其实粤语历史悠久，可追溯至先秦，与古汉语息息相关。日常用语“卒之”，即终于、最终之意，见《孟子．离娄下》：“卒之东郭墦间，之祭者，乞其余。”不少粤语词汇常见于成语及古诗词，保留至今，如（唐）李白《行路难》：行路难！行路难！多歧路，今安在？长风破浪会有时，直挂云帆济沧海。 粤语的“行路”，即现代汉语“走路”，而粤语的“走”即现代汉语“跑”的意思。我们现今常用的“走马看花”，本来形容得意、愉快的心情，亦比喻没有深入了解事物，略观外象而已。语出（唐）孟郊《登科后》：春风得意马蹄疾，一日看尽长安花。 “走马”是指骑着马跑。（汉）刘熙《释名．释姿容》：徐行曰步，疾行曰趋疾趋曰走。 又如（唐）杜甫《客至》：舍南舍北皆春水，但见群鸥日日来。花径不曾缘客扫，蓬门今始为君开。盘飧市远无兼味，樽酒家贫只旧醅。肯与邻翁相对饮，隔篱呼取尽余杯。 （宋）苏轼《浣溪沙》：麻叶层层叶光。谁家煮茧…	2020-06-12	文汇报	教育		930
粤语写期刊众筹成功 下月出炉 “广东话应该有佢嘅文学”	https://news.mingpao.com/pns/%e5%89%af%e5%88%8a/article/20200612/s00005/1591901043910/%e7%b2%b5%e8%aa%9e%e5%af%ab%e6%9c%9f%e5%88%8a%e7%9c%be%e7%b1%8c%e6%88%90%e5%8a%9f-%e4%b8%8b%e6%9c%88%e5%87%ba%e7%88%90-%e3%80%8c%e5%bb%a3%e6%9d%b1%e8%a9%b1%e6%87%89%e8%	【明报专讯】“我哋日讲夜讲广东话，用广东话书写，唔系理所当然咩？”《回响》总编辑山城猪伯说。团队近日筹办一本以全粤语书写的文学期刊，打正旗号“净系用广东话嘅”，于市面可谓绝无仅有。他们望以此推广我手写我心，开阔广东话文学的可能，本月初于众筹平台推出计划至今反应非常热烈，已筹得超过27万元，预计下月首期面世。 下笔前内心交战几回，到底此报道要否用多少广东话？一般来说，本版行文甚至引述受访者的说话，主要使用书面语，但如果要更贴近《回响》团队之提倡，以表达他们访谈时思想，采用多少广东话口语，便是既功能又贴题的决定。跟毕业于中大哲学系的《回响》总编辑猪伯电话访问，他说创刊先是源于对阅读的热情，小学起喜欢看金庸武侠小说，之后爱上阅读“日睇夜睇”：“第一其实系想推广阅读，阅读本身系一件好有魅力嘅事，写作都系。” “用广东话写嘢，应该系最有亲切感??。粤语可以写得出嚟，应该系要有佢嘅文学，点解唔可以？…	2020-06-12	明报	文化力场		2991
原创粤语音乐剧 一场米荒 唱跳香港力量	https://news.mingpao.com/pns/%e5%89%af%e5%88%8a/article/20200619/s00005/1592504808990/%e5%8e%9f%e5%89%b5%e7%b2%b5%e8%aa%9e%e9%9f%b3%e6%a8%82%e5%8a%87-%e4%b8%80%e5%a0%b4%e7%b1%b3%e8%8d%92-%e5%94%b1%e8%b7%b3%e9%a6%99%e6%b8%af%e5%8a%9b%e9%87%8f	【明报专讯】不久前疫症在港爆发之初，市面出现抢米抢厕纸，有人漠视他人大量囤积用品。现回神过来，有点可笑也可悲。香港舞蹈团与演戏家族联合演出《一水南天》，为康文署表演场地重开后即将上演的原创粤语大型音乐剧。作品制作足足花达7年，故事背景启发自1920年代香港一场米荒，海盗碰上来自潮州的小子之故事。风高浪急，小子可会挺身抵抗时代困局？ 所谓“揾食揾食”，港人如此拼搏为温饱，有餐饱饭食。2013年左右，有份参与多部舞台剧的编剧张飞帆，与作曲的刘颖途希望合力创作一个原创剧。一段香港早期历史深深吸引张飞帆，就是在上世纪20年代，因为人口增加，米行间暗暗囤积居奇，另有一战结束等外围因素，本港曾发生一次米荒，为期数月。然而，短短日子足以引起暴乱、杀人、饿死等况，事实上殖民政府其后快速订立保障米粮的条例，防止同类事件再次发生。张飞帆认为此段本土历史鲜为人知，决定以此作为背景原型。同时，他在机缘下接触到本…	2020-06-19	明报	文化		1665
粤语流行曲论文	https://stepaper.stheadline.com/article/152343131181569/副刊-粵語流行曲論文	在千禧年代，每逢周末都在商场演奏钢琴，大部分时间都是自己一个独奏，有时会邀请歌手作嘉宾，有时邀请多两位乐手，一个低音结他手及一位鼓手，好让演出效果更丰富。但不论有没有嘉宾，有一样东西一定要做的：就是不断学新歌。因为一曲走天涯，很难留着旧听众，或吸纳新听众。因此那时候除了要读书外，一旦有空档时间，如坐火车上学、坐小巴回家，都要不断听着新的流行曲，令自己的演奏曲目追上潮流，继而令观众共鸣感更大。 二○○五年开创了自己的制作公司，可能因为公司装修独特，当时新浪网便租用公司单位，作一个专门访问歌手的直播室，我于是亦被邀请，担任主持及现场伴奏。接着两年便有大量歌手，不断到我公司拍摄，我亦因此要不断学习他们的新歌，在节目中伴奏。自己在当时乐坛的网络扩大之外，最大的得着，就是无形中深入研究了那十年的流行音乐：作曲风气、编曲技巧、主旋律潮流等等。 可惜停止了定期的商场演奏后，学新歌的动力亦同时失去，之后…	2020-07-04	星岛日报	副刊		704
龙七公：保护粤语文化 不应存在排外	https://orientaldaily.on.cc/cnt/news/20200715/00184_010.html	前阵子，香港某份报章一连上载几段推广粤语措词的视频，但却用上“戒匪语”作为标题，直指香港人不应受到内地官方及民间语言所影响，实在令人相当遗憾。事实上，我认同粤语文化是需要保护，但不应存在不必要的排外情绪，因而损害内地与香港群众之间的感情。 首先看看“匪”字背后的意思和含义，就会知道该报章措词是别有用心。于冷战时期，大陆和台湾的执政者均以“匪”称呼对方，用以贬低双方合法性而达致宣传的效果。只是现在已经时移世易，两岸关系亦脱离过去零和对弈的紧张局面，对话均以“九二共识”作为指导性原则，而以“匪”称呼对方的时期更是一去不返。至于香港该报章以“匪语”形容内地的中文措词，做法当然是“匪夷所思”，既不尊重内地群体的同时，亦欠缺了传媒应有的专业操守，无非就是要掀起本地的排外情绪。 仇视情绪 心思狭隘 与此同时，香港部分人士近年指摘内地所使用的简体文字为“残体字”，充满挑衅不屑的意味，而忽略内地推行简体…	2020-07-15	东方日报	龙门阵	陈曼琪	1161
研发粤语Voicebot抢先机	https://news.mingpao.com/pns/%e6%b8%af%e8%81%9e/article/20200720/s00002/1595183454241/%e7%a0%94%e7%99%bc%e7%b2%b5%e8%aa%9evoicebot%e6%90%b6%e5%85%88%e6%a9%9f	【明报专讯】吴德川早在2003年夏季，仍在大学三年级时，就开设网站T-Dimension来销售手机和数码相机等消费电子产品，一直经营至今。现时该网站将电子产品卖到约30个国家和地区，客路以B2C为主。因此，若加上Parami在香港和台湾的60多个客户，Asanga这套Chatbot制作工具其实已经有很多实战经验。在去年的“中大创业日”中，Parami就获选为冠军。该公司也是香港工业总会今年的“初创企业指导计划”的入选企业之一。 可声控电梯 变身英语教学平台 除了Parami，吴德川还和朋友在2018年成立了另一家同系公司NERV，开发具有人工智能的语音对答机械人程式（Voicebot），支援英文、普通话及广东话，近月刚推出服务。现时已有几个本地零售业客户，用于电话客户服务。 NERV亦正在投标某政府部门的合约，将之应用于有关维修的电话客户服务；还和几家电梯生产商合作，测试用语音来控制电梯…	2020-07-20	明报	港闻		703
不谙粤语英文差 新来港女拚搏获佳绩	http://paper.wenweipo.com/2020/07/23/HK2007230045.htm	（记者 詹汉基）“赢在起跑线”并不代表一切，哪怕客观条件匮乏，努力付出必有回报。慕光英文书院考生苏琪，一家三口蜗居在板间房，两年前来港时不谙粤语、英语水平较低，但没有妄自菲薄，虚心向老师讨教，最终考得6科33分佳绩，中文及数学更分别获5**及5*。她期望未来能升读大学商科课程，除了希望学有所成、报答父母，也愿以自己能力为香港繁荣稳定作贡献。 “我一直都在适应，因为一直都有嘢improve（改进）”，自苏琪来港后，一直抱着不卑不亢的态度适应新生活。她忆述初来港时“完全不会说广东话，也非常紧张；犹幸老师鼓励我去参加粤语朗诵比赛，让我在朗诵诗歌的过程中学习。我的发音虽不完美，但已经进步了不少！”她提到，与本地学生沟通时不应“怕丑”，例如对着“好chur”这类地道用语，不懂时便要发问，才能慢慢进步。 除了日常沟通外，苏琪初时的英语水平也相对较差，为此她特别设定时间表，逐一攻克听、说、读、写等范畴…	2020-07-23	文汇报	港闻		869
粤语长片	http://117.122.212.150/a.php?f=20200729/xk-2.txt	相信对于很多香港年轻人而言，提到“粤语残片”想到不是那一出出黑白电影，而是陈奕迅那首歌。我一直想找来听听，但一直没有机会。一天深夜，心血来潮，随手打开搜索“粤语残片”的第一个结果──结果就看到了凌晨三点。 那部粤语“残片”叫《危楼春晓》，电影讲述的是一班住在同一间旧唐楼里低下阶层市民的故事。在年久失修的板间房里，这一群性格、背景、职业不同，但同样一贫如洗的人互相支撑，互相依赖着面对生活中的风风雨雨。 影片刚刚开始的时候，各人虽清贫但毕竟都有一份工可以勉强糊口。偶尔也有人急需用钱，其他住客也会倾囊相助。最令我动容的是一场生日宴的戏。两位租客生日相近，于是约定一同请众人食大餐，谁知一个被拒绝预支薪水，另一个被学校辞退，都囊中羞涩。另外一位租客见两人愁眉不展，询问之下，一口应承下来答应帮忙。生日当天，其他租客都围坐一桌引颈以待，谁知上桌的食物都是鱼蛋、炒粉面等等街边小食。帮忙的租客解释原委之后…	2020-07-29	大公报	小公园	利 贞	653
【缘聚香江 中联办员工之窗】从“读”粤语说开去	http://paper.wenweipo.com/2020/07/30/HK2007300040.htm	宣文部 陈志军 来香港工作粤语是“必修课”，当然这门功课的重点是学以致用，做到“识听识讲”。但其实在香港媒体和其他地方，都可以信手“读”到粤语，说来这也是一种颇为有趣的香港文化现象。 粤语白话文的形式多样。有的是比较纯粹的文章，主要是在报纸杂志上，如《大公报》的“港东港西”栏目等；一些文学刊物等也尝试用粤语白话写作，这些文章长短不一，带有一点港式的嬉笑怒骂，虽然也有一些遣词造句的不同，但总体上较为规范。有的是在规范中文当中，不时夹杂着一些粤语白话，如采访人物的粤语原话，粤语对白等等；香港文学作品也时有这种行文方式。还有的往往是一些文章的标题，或是大街小巷的广告标语，或是网络论坛和社交媒体上点缀的粤语文字等，这些长短不一的粤语白话用词比较随意，不那么规范，往往还夹杂着英文单词。 粤语白话文相对规范的书写，可追溯到明清时期的木鱼书、《粤讴》等粤语文学及后来粤剧剧本等。早期的木鱼书是木鱼歌（类…	2020-07-30	文汇报	港闻		1685
网传华大基因疑聘内地医护来港 要求懂粤语具港澳通行证	https://hk.on.cc/hk/bkn/cnt/news/20200802/bkn-20200802104737925-0802_00822_001.html?v=js	政府早前宣布，会为4个高风险群组安排检测，包括食肆、安老院、物业管理员工及的士司机。相关检测工作被外判予3间私人企业进行，包括基因检测公司Prenetics、内地华大基因旗下的华升诊断中心，以及中国检验有限公司。内地微博日前流传一张声称是华大基因的招聘广告，指以2.5万至3万港元的薪金，招聘内地人在港工作，为病人采集鼻咽样本，暂未知是否与内地协助本港进行大规模检测有关。 微博流传的华大基因招聘广告列明，以2.5万至3万港元的薪金招聘咽拭子采集员，申请条件包括会说粤语、持护士资格，以及有港澳通行证的人士，负责在港工作，每天工作10小时。惟华大基因官方网页中，未有刊出相关招聘广告。 不过，根据香港护士注册条例，无持有由香港护士管理局，或局方承认的核证团体发出的执业证明书的人，不得执业为注册护士，但若在解放军中服务或由政府全职雇用，则可豁免注册。东网正向华大基因查询招聘是否属实，暂未获回覆。 …	2020-08-02	东方日报	即时港澳		455
7名来港先遣队员来自广东讲粤语 2人曾赴京抗疫	https://std.stheadline.com/realtime/article/1335682/即時-港聞-7名來港先遣隊員來自廣東講粵語-2人曾赴京抗疫	应港府请求，中央政府决定派出两支队伍支援香港抗疫，一支负责协助筛查检测，由广东省组建；一支负责援建方舱医院，由湖北武汉组建。今日下午，“内地核酸检测队”的7名先遣队员已从深圳湾口岸过关来港。他们与港府卫生部门、华大基因等检测机构碰头开会后，将开始协助实验室工作。深圳市衞健委指，今天下午出发的7名先遣队员，5人来自广州，2人来自深圳，分别从广东省疾控中心、广东省人民医院、中山大学附属第一医院、深圳市人民医院选派。“广东队”会讲粤语，有语言上有优势。 深圳市衞健委介绍，来自深圳市人民医院检验科的主任技师龚文波、龚文胜说，“7月31日晚上接到的通知，准备出发去香港。”。2人在医院里共事了近30年，不是亲兄弟，胜似亲兄弟，而且2人上月都刚从北京支援归来。 龚文波是深圳检验界资深人员。他从1990年起便在深圳市人民医院检验科工作，先后从事检验科免疫、微生物、临检、血液、生化等专业工作，是深圳市医学…	2020-08-02	星岛日报			1303
队员精通粤语 检测经验丰富	http://paper.wenweipo.com/2020/08/03/HK2008030002.htm	（记者 郭若溪、文森）今次为香港的抗疫战，充分体现中央政府永远是香港特区最强大的后盾，在七名“先遣队”人员抵港协助开展实验室工作的同时，深圳市卫健委已应香港医管局请求，紧急筹集大量医疗物质，包括400张普通病床、医用雪柜等多项病房用品，昨日起陆续送抵香港，支援香港建设“方舱医院”。 多项病房用品陆续抵港 深圳市卫健委表示，七人“先遣队”跟特区政府卫生部门，及华大基因等检测机构开会后，将开始协助实验室工作。内地亦将派出“方舱医院支援队”，协助将亚博馆改建为“方舱医院”。深圳市卫健委称，应香港医管局的需求，紧急采购物资，包括400张普通病床、400个床头柜，及医用雪柜等多项病房用品，昨日起陆续送往香港。 据深圳卫视深视新闻报道，昨午，七名先遣队员在深圳湾口岸集合完毕，充满必胜决心。此次“先遣队”由中山大学附属第一医院、深圳市人民医院等多家三甲医院的骨干力量组成，他们都精通广东话，与香港部门无…	2020-08-03	文汇报	港闻		851
“先遣队”队员精通粤语 检测经验丰富	http://news.wenweipo.com/2020/08/03/IN2008030007.htm	队员下榻九龙维景酒店，陆续展开协助工作。 香港文汇报记者 摄 【文汇网讯】今次为香港的抗疫战，充分体现中央政府永远是香港特区最强大的后盾，在七名“先遣队”人员抵港协助开展实验室工作的同时，深圳市卫健委已应香港医管局请求，紧急筹集大量医疗物质，包括400张普通病床、医用雪柜等多项病房用品，昨日起陆续送抵香港，支援香港建设“方舱医院”。 多项病房用品陆续抵港 深圳市卫健委表示，七人“先遣队”跟特区政府卫生部门，及华大基因等检测机构开会后，将开始协助实验室工作。内地亦将派出“方舱医院支援队”，协助将亚博馆改建为“方舱医院”。深圳市卫健委称，应香港医管局的需求，紧急采购物资，包括400张普通病床、400个床头柜，及医用雪柜等多项病房用品，昨日起陆续送往香港。 据深圳卫视深视新闻报道，昨午，七名先遣队员在深圳湾口岸集合完毕，充满必胜决心。此次“先遣队”由中山大学附属第一医院、深圳市人民医院等多家三…	2020-08-03	文汇报	即时新闻		897
世纪．六合文艺：粤语歌填词 不是只讲feel	https://news.mingpao.com/pns/%e4%bd%9c%e5%ae%b6%e5%b0%88%e6%ac%84/article/20200822/s00018/1598034787326/%e4%b8%96%e7%b4%80-%e5%85%ad%e5%90%88%e6%96%87%e8%97%9d-%e7%b2%b5%e8%aa%9e%e6%ad%8c%e5%a1%ab%e8%a9%9e-%e4%b8%8d%e6%98%af%e5%8f%aa%e8%ac%9bfeel	【明报文章】“回想自《分飞燕》、《啼笑因缘》等歌曲引发粤语流行曲的振兴至今，已经有四十七年！这近五十年之间产制的粤语歌词应是数以万计，可是，与粤语歌创作息息相关的文字声律上的种种表象隐象，始终没有谁来仔细深入地研究一下，笔者觉得是很不正常的！” 以上文字，是笔者在拙着《文字声律与粤语歌创作》的后记中的一段，颇是感叹。 事实上，粤语歌曲风行了近半个世纪，然而人们对于填写粤语歌词之协音与否，始终停留于感觉的层次，即是感觉到要这么这么填便协音，却难以说得出为何要这么填，亦即古人说的“知其然而不知其所以然”。 笔者近年努力地钻研，期求建立一个简明的理论体系，借它可以合理解释粤语歌协音上各种现象和问题，提供一种客观的参照。《文字声律与粤语歌创作》一书的内容，算是很初步达到这个目标。 字音乐音的两种结合 为了方便读者读下去，得先简略介绍一下与粤语歌创作有关的文字声律基本元素，而这亦可喻之为“粤语歌的…	2020-08-22	明报	作家专栏	文．黄志华／编辑．关晓阳	2691
粤语片老小生	https://stepaper.stheadline.com/article/152603131201969/%E5%89%AF%E5%88%8A-%E7%B2%B5%E8%AA%9E%E7%89%87%E8%80%81%E5%B0%8F%E7%94%9F	资深粤语片演员谭炳文，高龄八十六岁逝世。“炳哥”出道於上世纪六十年代末，以小生姿态登上粤语片银幕，可惜那时粤语片走向衰落，“炳哥”夥拍艳星狄娜，拍了几部艳情喜剧，以《七擒七纵七色狼》为代表作。 此片以雪姑七友为蓝图，讲香港基层，七个王老五住了一个单位，租了一间房给一名身材惹火的妙龄女子。谭炳文是“七色狼”之中最为青靓白净的一位，做小巴司机，其他如高鲁泉、戴伟光、郑君绵等，看见狄娜垂涎。最後当然由谭炳文护花救美，片中有大量当年香港街景，甚为珍贵。狄娜和谭炳文两人，气质定不通电，但不要紧，那时香港观众要求不高。粤语片式微之後，这对男女主角纷纷投身无綫电视，狄娜摇身一变成为女富豪，但後来破产。以金枝玉叶置身在无綫主持介绍电影的《蒙太奇》，而谭炳文除了配音，还夥拍王爱明主持《声宝之夜》，接受观众上台唱歌献艺比赛，满分共五盏灯。当年谭炳文旁述：一盏灯、两盏灯、三盏灯，晚饭的香港电视观众甚为熟悉。 …	2020-09-08	星岛日报	副刊		637
穗粤语讲古“非遗曲艺说书场”挂牌	http://today.hkcd.com/content/2020-09/10/content_1214056.html	穗粤语讲古“非遗曲艺说书场”挂牌 【香港商报讯】记者黄裕勇报道：9月8日，粤语讲古“非遗曲艺说书场”在广州市越秀区博物馆（五仙观）正式挂牌。广州将以有400多年历史的粤语说书为重点，助力广府曲艺传承发展。 广府曲艺有文字记载的历史可追溯到西汉时期，粤语说书在岭南已经有400多年的历史。如今，粤语说书以“粤语讲古”之名，列入广东省级非物质文化遗产代表性项目名录，其传承谱系自近代粤语说书表演艺术家、爱国说书艺人陈干臣先生以来，已传承到第五代。 为积极响应2019年国家文化和旅游部印发的《曲艺传承发展计划》，广州市文化广电旅游局通过深入调研，制定实施计划，加快推进试点实践工作，助力广府曲艺传承发展，以粤语讲古为重点，提高传统说书和传统音乐、传统舞蹈、传统戏剧、曲艺等表演艺术类非遗项目的实践频次、展演水平和传承教学力度；并将在剧场、书场、茶楼等固定演出场所常年开展驻场演出的表演团体纳入扶持范围。…	2020-09-10	香港商报	直通南粤		561
粤语发源地：肇庆封开 以全域旅游 展生态之魅	http://www.hkcd.com/content/2020-09/29/content_1218893.html	【香港商报讯】报道 9月28日记者随“2020-外媒走读肇庆”采访团穿越北回归线上的黑石顶自然保护区，沿着“潇贺古道”进入岭南文化发祥地、粤语发源地封开。封开山清水秀，人杰地灵，既有潇贺古道的历史沉淀，又有大美山川的自然景观，历史与自然的完美融合，共同交织成一幅令人流连忘返的岭南画卷。 穿越北回归线上的黑石顶自然保护区，森林茂密，生物资源极为丰富 穿越北回归线上的黑石顶自然保护区 采访团在黑石顶自然保护区区生华主任等人的引领下进入保护区，保护区境内谷幽涧深，地形复杂，森林茂密，生物资源极为丰富，北回归线横穿整个保护区，被誉为“北回归线上的绿洲”。 据区生华介绍，广东封开黑石顶省级自然保护区位于广东省封开县中南部，地理坐标为23°25′——23°29′N，111°49′——111°55′E，北回归线横穿保护区中部向北联通南岭山地，西南通过彼此相连云开山脉、六万山脉和十万山脉与中南半岛相联系…	2020-09-29 00:00:00	香港商报	湾区动态		1796
粤语经典旧歌翻唱再添活力	http://www1.hkej.com//dailynews/finnews/article/2615856/	“揸车、在家里、吃饭、起身、工作等，基本上都会听歌。”腾讯音乐副总裁侯德洋几乎大部分时间都在听歌，作为香港人，他亦致力推广广东歌，最新企划是通过旧歌翻唱，例如找吴业坤唱杨千嬅的《可惜我是水瓶座》，注入新活力。 2007年加入腾讯（00700），侯德洋最初7至8年在国际业务部，负责JOOX和微信推向海外市场。当时JOOX在香港、印尼、泰国、马来西亚等地方推出，并以本地化团队让当地音乐人得以发展，2015年他升任为SNG社交网络事业群数字音乐部总经理，担起内地QQ音乐的大旗。 吴业坤演绎杨千嬅名曲 侯德洋说，其实广东省有一批喜欢听粤语歌的用户，因此推出一个旧歌翻唱歌单，“我们找坤哥帮我们唱杨千嬅的《可惜我是水瓶座》，又找岑宁儿唱《最爱是谁》，请Supper Moment唱《早班火车》。”他表示，希望使经典歌曲有焕然一新的感觉，让年轻用户也喜欢。 至于自己听歌的喜好，侯德洋笑说：“我比较滥，咩…	2020-10-26	信报	财经新闻		510
【恒大清思】蜑家人水上话 粤语大同小异	http://paper.wenweipo.com/2020/10/28/ED2010280004.htm	不知各位读者可曾试过被人指出自己所说的粤语并非“正宗”的香港粤语？笔者便有过这样的经验，当时笔者调侃对方道，凭他的“新界屋邨粤语”标准，论断笔者这个土生土长的香港岛人粤语不正宗，实在可笑。对方之所以有此想法，估计是因为他心目中的香港粤语，是我们日常通用的“市区粤语”，与此不一致的一概视为错误或“不正宗”。 其实，早在香港发展成都市之前，已有四大民系到此聚居，他们各自有自己的“话”，和我们现在所说的粤语大同小异，笔者的母系家族为水上人，即所谓蜑家人（虽然他们不会以此自称），他们所说的水上话，确实与都市人说的粤语略有不同。 语音方面，粤语的“oe”音（即“靴”的声母），后面若带“ng”韵尾，水上话常读作“o”，所以“开窗”读作“开仓”、“香港”读作“康港”（据说这是英语Hong Kong的由来）；又如粤语的圆唇音“yu”，水上话常读成近似“i”，所以“钓鱼”读成“呔倚”，“月光”读近“热光”…	2020-10-28	文汇报	教育		1062
【旅游气泡】新加坡交通部长流利粤语推广计划称将与港全力合作14:21	https://hd.stheadline.com/news/realtime/hk/1921258/即時-港聞-旅遊氣泡-新加坡交通部長流利粵語推廣計劃-稱將與港全力合作	新加坡和香港的“航空旅游气泡” 11月22日正式启动，新加坡交通部长王乙康今日推广计划，更用流利粤语强调计划，“我们一定会全力合作，一起做给全世界看”。 计划启用初期，每天只有一趟往返新加坡和香港的专属航班，每趟最多只能载200人。到下个月7日，则增至每天两趟航班。旅客的旅行目的和行程将不受限制，但须在出发前72小时接受新冠病毒检测，并呈阴性结果。旅客也须乘搭专用航班，班机上不能有其他过境旅客或不属於该安排的旅客。	2020-11-11	头条日报	即时港闻		216
【旅游气泡】新加坡交通部长流利粤语推广计划 称将与港全力合作	https://std.stheadline.com/realtime/article/1421258/%E5%8D%B3%E6%99%82-%E6%B8%AF%E8%81%9E-%E6%97%85%E9%81%8A%E6%B0%A3%E6%B3%A1-%E6%96%B0%E5%8A%A0%E5%9D%A1%E4%BA%A4%E9%80%9A%E9%83%A8%E9%95%B7%E6%B5%81%E5%88%A9%E7%B2%B5%E8%AA%9E%E6%8E%A8%E5%BB%A3%E8%A8%88%	新加坡和香港的“航空旅游气泡” 11月22日正式启动，新加坡交通部长王乙康今日推广计划，更用流利粤语强调计划，“我们一定会全力合作，一起做给全世界看”。 计划启用初期，每天只有一趟往返新加坡和香港的专属航班，每趟最多只能载200人。到下个月7日，则增至每天两趟航班。旅客的旅行目的和行程将不受限制，但须在出发前72小时接受新冠病毒检测，并呈阴性结果。旅客也须乘搭专用航班，班机上不能有其他过境旅客或不属於该安排的旅客。	2020-11-11	星岛日报	即时港闻		216
星交通部长 粤语推广“航空泡泡” “下一站新加坡？” 冀更多港人到访	https://paper.hket.com/article/2800672	港星的旅游气泡协议本月22日正式开始，新加坡交通部长特意练习广东话拍片宣传，抢走了不少镁光灯。 王乙康特意练习几句 星洲交通部长王乙康昨早于个人facebook专页，贴出在樟宜机场的星耀樟宜所拍的3分多钟短片。片段原本一直用英语，但剩下26秒时，镜头一切，他突然转用粤语，“下一站，新加坡？”他笑谓，港人口中的“旅游气泡”，当地人称为“航空泡泡”，双方未来一定会全力合作，做给世界看；又跟港人约定，希望更多人会到访狮城。 据他在Instagram解释，自己祖籍不在广东，但特意练习了几句，以宣布星港两地重要的旅游气泡安排。王乙康的短片吸引逾3,000人点赞、逾千人转发，连新加坡网民都留言表示，很少听到国会议员讲粤语。 虽然星洲官方一直用简体字，但王乙康“转频道”后添加的中文字幕，几乎尽用上繁体字，更有“哋”、“畀”、“嚟”等港人惯用的口语用字。而且，他还在fb留言，贴上本港商经局局长邱腾华所拍…	2020-11-12	经济日报	要闻		564
明爱研自动粤语足球评述系统 冀可应用其他运动及语言	https://std.stheadline.com/realtime/article/1433842/%E5%8D%B3%E6%99%82-%E6%B8%AF%E8%81%9E-%E6%98%8E%E6%84%9B%E7%A0%94%E8%87%AA%E5%8B%95%E7%B2%B5%E8%AA%9E%E8%B6%B3%E7%90%83%E8%A9%95%E8%BF%B0%E7%B3%BB%E7%B5%B1-%E5%86%80%E5%8F%AF%E6%87%89%E7%94%A8%E5%85%B6%	AI（人工智能）应用层面广泛，将来观赏足球比赛时，有机会听到AI粤语旁述员的生动演绎。明爱专上学院正研究自动粤语足球评述系统，研究团队表示，系统运用AI及翻译等方面的知识，属跨学科研究，期望制造贴近真人、说话生动的AI粤语评述员，也期望把技术应用在其他运动及语言。 参与研究的电子计算及信息科学院研究教授萧允治指，足球普及程度高，受普罗大众欢迎，因此特意选取为研究对象。他表示，研究涉及多方面知识，运用深度学习及图像处理等技术，识别球员的身体语言及表情，也会捕追踪足球的动向，然後再将资讯转化为评述。 研究也涉及语文，人文及语言学院院长陈善伟也参与其中。他指出，学术界一直缺乏对自动评述系统的语文研究，又表示他们基本上是“由零开始”，分析过往的足球评述，研究当中的语言特色。他期望能为AI评述员注入个人风格，例如是加入口头襌，让评述更显生动。 团队早前曾经尝试，用AI为本地球会“东方”对阵越南球队…	2020-11-26	星岛日报	即时港闻		623
明专研AI粤语足球评述员	http://hd.stheadline.com/news/columns/0/20201127/899211/專欄-Executive日記-明專研AI粵語足球評述員	AI（人工智能）应用层面广泛，Kelly就得知，明爱专上学院o依家研究紧自动粤语足球评述系统，大家以后睇波，有机会听到AI旁述员用粤语生动演绎喇。 参与研究嘅电子计算及信息科学院研究教授萧允治话，足球受普罗大众欢迎，团队特意选做研究对象，又话研究涉及多方面知识，如运用到深度学习及图像处理等技术，以识别球员嘅语言动作，同时追踪足球动向，再转化为评述。人文及语言学院院长陈善伟就话，学术界一直缺乏自动评述系统嘅语文研究，所以基本上佢哋系“由零开始”，期望可以帮AI注入个人风格，例如口头襌等。 团队指项目依家仲系研究初期，评述比较生硬，同真人有段距离，可能要再研究三年，AI评述先可以贴近真人。 Kelly Chu	2020-11-27	头条日报	Executive日记	KellyChu	323
明专研AI粤语讲波系统	https://stepaper.stheadline.com/article/132793131223870/%E6%95%99%E8%82%B2-%E6%98%8E%E5%B0%88%E7%A0%94AI%E7%B2%B5%E8%AA%9E%E8%AC%9B%E6%B3%A2%E7%B3%BB%E7%B5%B1	足球比赛总会听到评述员的生动演绎，明爱专上学院正研究自动粤语足球评述系统，运用人工智能（AI）技术，自动捕捉球赛细节“讲波”。研究团队期望，制造贴近真人、生动的AI粤语评述员，技术应用在其他运动及语言上。 “王庭重接住个波，射波！好野！入波！清化，二比一，大家都好开心。”明专团队早前以AI系统，应用於本地球会东方对战越南球队清化的赛事旁述，系统仍在研究初期，语气较生硬，虽与真人、电子足球游戏评述仍有距离，但可见“AI评述员”已有辨别球员与描述赛事的能力。 加口头禅生动表达 参与研究的电子计算及信息科学院研究教授萧允治称，系统运用深度学习及图像处理等技术，捕捉球赛细节，包括球员动作与表情，再加以分析及转化文字，再由AI技术生成的评述员读出。人文及语言学院院长陈善伟负责语言部分，为让评述更生动，加入口头禅，“例如每次见到入球都会大叫『哇』！” 团队指整个研究需时三年，才能令AI评述员贴近真人…	2020-11-27	星岛日报	教育		619
网学时代：粤语拼音输入法易学过仓颉 重新认识广东话	https://news.mingpao.com/pns/%e5%89%af%e5%88%8a/article/20201213/s00005/1607796565593/%e7%b6%b2%e5%ad%b8%e6%99%82%e4%bb%a3-%e7%b2%b5%e8%aa%9e%e6%8b%bc%e9%9f%b3%e8%bc%b8%e5%85%a5%e6%b3%95%e6%98%93%e5%ad%b8%e9%81%8e%e5%80%89%e9%a0%a1-%e9%87%8d%e6%96%b0%e8%	【明报专讯】十月份一个湿冷的雨天，记者行经旺角室内小型市集时，目光被一张印有夕阳馀晖的明信片吸引，明信片上印有“seon3 zeoi3 hau6 sin6 loeng4 lau4 zoi6 sai3 gaai3”，询问年轻摊主始知那是粤语拼音，原来是广东歌《最后的信仰》的歌词“信最后善良留在世界”。不知从什么时候开始，年轻人开始用粤语拼音沟通与表达感受？学校没有教，他们是从何学识？又为何要学？但更值得问的是，为何说了这么多年广东话，却从没学过粤拼？记者总觉得粤语拼音的文字组合很美，今次就决心看影片自学粤拼输入法！结果发现，原来比仓颉输入法容易太多太多了。 ■记者实测 ※学识时间 影片：52分钟 实测时间：2小时 成果：打31个字，其中4个字需查字典 影片：【广东话教室】52分钟学识LSHK粤拼（YouTube） 看过本系列的读者都知道，以往记者专门挑选速成班类短片，以测试到底用3分钟或5…	2020-12-13	明报	星期日WorkShop		3528
生活关键词：顶呱呱的粤语状貌词	https://news.mingpao.com/pns/%e6%95%99%e8%82%b2/article/20201216/s00011/1608056182409/%e7%94%9f%e6%b4%bb%e9%97%9c%e9%8d%b5%e8%a9%9e-%e9%a0%82%e5%91%b1%e5%91%b1%e7%9a%84%e7%b2%b5%e8%aa%9e%e7%8b%80%e8%b2%8c%e8%a9%9e	【明报专讯】滑捋捋、肥嘟嘟、红卜卜……你曾听过这些形容词吗？这类词语称为“状貌词”，即以语音直接表义，生动地模仿事物的形状、颜色、性质等。除了形容事物，状貌词还包含了说话者对该物的感觉。一起来探讨这种只闻其声、不见其字的词语吧！ 什么是“状貌词”？ 状貌词是以声音模仿事物形状、颜色、气味、动作等的词语，粤语中的状貌词一般以“ABB”的形式出现。“A”代表形容词或动词，“BB”代表后附的状貌词，如：（图b） 状貌词常以叠字形式出现，但也有“圆咕辘”（“咕辘”读音：gu1 luk1）这类后面两字没有重叠的例子。状貌词多口语，两个状貌的字通常不含实意，不能脱离前面的形容词单独使用，如“嘟嘟”和“捋捋”不配合“肥”或“滑”，便无法组成有意思的词语。此外，状貌词一般“有音无字”，或有本字但意义相去甚远。本文为方便阅读，故取用同音或近音的文字表示，并以粤语拼音表示其正确发音。 不过，纵然词语以“AB…	2020-12-16	明报	语文同乐 第480期		1682
敢观舞台：关于香港粤语流行曲的省思 -从 《假音人回到浪漫音乐会》 说起	http://paper.wenweipo.com/2020/12/26/YC2012260002.htm	文：梁伟诗 2020年，全球被疫情阴影笼罩，现场舞台观演成奢侈。漫长时间里，我们留家抗疫：听(老)歌、煲剧、流连网络，连工作也不得不倚赖zoom meeting，zoom teaching。刚结束的学期，在学院讲授香港流行文化，密集地重温六七十年代至今香港粤语流行曲的发展历程、高低起跌，亦于香港独立音乐创作人周博贤一次分享会中，进一步重新审视广东歌与香港文化身份之间千丝万缕的关系。十一月下旬的《假音人回到浪漫音乐会》专注地“回到浪漫”，倾听“假音人”选唱呼应“浪漫”标题的陈百强歌曲，迅即将沉溺多时的思考，幻化为跨越两世纪的对话。 从《佐敦》开始认识“假音人”，在MLA、Serrini之前香港老早就有玩味十足的《什么是青春》、《我爱上了你的男朋友》、《寂寞的TB》、《女飞贼》、《造世界》等“假音人”非典型广东歌。《假音人回到浪漫音乐会》出于进念《香港歌书》系列的音乐企画，重新“玩”陈百强的…	2020-12-26	文汇报	艺粹		1699
{守护粤语达人}张锡莉 守护粤语 守护移民后代的尊严	https://news.mingpao.com/pns/%e5%89%af%e5%88%8a/article/20210131/s00005/1612031463219/%7b%e5%ae%88%e8%ad%b7%e7%b2%b5%e8%aa%9e%e9%81%94%e4%ba%ba%7d%e5%bc%b5%e9%8c%ab%e8%8e%89-%e5%ae%88%e8%ad%b7%e7%b2%b5%e8%aa%9e-%e5%ae%88%e8%ad%b7%e7%a7%bb%e6%b0%91%e5%be%	【明报专讯】与香港时差相距16小时的美国加州，有一个香港人在史丹福大学开班教授香港粤语长达21年。最近校方以预算紧绌为由，不再跟这名全校唯一的粤语讲师续约，触发3500人联署请愿抗议有关决定。事件同时唤醒一段血泪移民史，请愿书指史丹福创校人当年借僱用和剥削大量华工兴建铁路致富，九成工人是来自珠江三角洲，大学对经办粤语课责无旁贷。至今学校所在之湾区，有超过12万人说粤语，比说普通话人口的多约5万人。张锡莉老师受访时说，眼见20年来很多粤语父母宁送子女学习普通话，曾经担心粤语会在当地消失，但自2014年雨伞运动后，她明显感受到变化，不单收到查询问子女在当地学习粤语的途径，美加多间大学和社区接连开办粤语班，也有内地人主动提出帮手捍卫粤语。张老师说她教粤语有一种使命感，因为语言不止是文化的载体，更是每个人的一部分，守护粤语，同时亦是守护华裔移民孩子的母语和尊严。 “突然一个几分钟的Zoom me…	2021-01-31	明报	副刊		5034
西西笔下两个女子 粤语高唱室内歌剧	https://news.mingpao.com/pns/%e5%89%af%e5%88%8a/article/20210205/s00005/1612462371343/%e8%a5%bf%e8%a5%bf%e7%ad%86%e4%b8%8b%e5%85%a9%e5%80%8b%e5%a5%b3%e5%ad%90-%e7%b2%b5%e8%aa%9e%e9%ab%98%e5%94%b1%e5%ae%a4%e5%85%a7%e6%ad%8c%e5%8a%87	【明报专讯】西西小说改编成室内歌剧，香港文学可以写作歌剧唱词？香港艺术节委约作品，室内歌剧《两个女子》，改编西西小说〈像我这样的一个女子〉及〈感冒〉，让两个文本的主角在新故事中相遇。在歌剧中，演员演唱用上诗化语言、大量意象，以及不同音乐风格的乐曲，表达两女子的内心挣扎。两个主创希望，即使没看过小说，观众仍能看明白这歌剧。 作家西西有两篇短篇小说，少有地以爱情为主题，分别关于两个女子。〈像我这样的一个女子〉（下称：〈像〉）中的殓容师，因为自己的职业，觉得仰慕的男子夏会抛弃自己；而〈感冒〉则讲述患感冒的女子小鱼，在父母安排下被迫出嫁，抛弃相爱的男子楚。由作曲家卢定彰和作家黄怡所写的室内歌剧《两个女子》，就以歌剧串连两个畏惧世俗、渴望爱情的女子。 跟原着“形不似而神似” 卢定彰由2017年开始，尝试以香港文学创作音乐作品，曾改编作家马朗和西西的其他作品，又以〈像〉为蓝本创作过英语室内歌剧。到2…	2021-02-05	明报	文化		1655
特写：主任粤语贺岁 员工方言祝福	http://paper.wenweipo.com/2021/02/06/HK2102060042.htm	“大家新年好！”骆主任昨日在“云酒会”上以广东话向各位市民、各位朋友祝好，并带领副主任陈冬、杨建平、仇鸿、卢新宁、谭铁牛、何靖举杯共同祝福祖国、祝福香港︰“国安家好，福满香江！” 中联办的人员来自祖国各地，昨日的“云酒会”上也让大家一瞥大楼内所汇聚的不同地域文化。不同员工分别以北京话、重庆话、桂柳话、客家话、潮汕话、东北话、河南话、陕西话、安庆话讲“新年好”，但最打动香港市民的，应该是骆主任以广东话说“大家新年好”了。 ●香港文汇报记者 郑治祖	2021-02-06	文汇报	港闻		236
蔡英文勉励说粤语民众抱持信念 20:13	https://www2.hkej.com/instantnews/current/article/2711491/	台湾总统蔡英文发表春节谈话，向台湾及全球各地民众拜年，当中特别提到说粤语的民众。蔡英文说，请他们相信，民主制度或者不完美，但依然是目前为止，人类社会最好的制度，并请他们抱持信念，不要放弃，又尝试以广东话祝福他们新年平安。 另外，蔡英文在谈话中形容过去一年是辛苦的一年，新冠疫情扩散，民众生活都被搅乱。不过，展望今年疫苗接种率逐渐提高，希望不只台湾生活如常，全世界都可以恢复正常，等到疫情缓和，就可以一切如昔、恢复交流。	2021-02-10	信报	即时时事脉搏		216
蔡英文粤语祝平安吁抱持信念	http://www1.hkej.com//dailynews/cntw/article/2711722/	台湾总统蔡英文在2月10日发表在总统府预先录制影片向各界拜年时说，有许多讲粤语的朋友，过去一年，谢谢大家继续关注她的Facebook账号，“我也要请你们相信，民主制度也许不完美，但依然是目前为止，人类社会最好的制度。请大家抱持信念，不要放弃”，她用粤语祝大家“新年平安”。 蔡英文说，去年是辛苦的一年，她记得也是从农历新年开始，疫情陆续扩散，全世界人们的生活都被搞乱了。今年，随着全球疫苗的施打率逐渐提高，希望不只台湾生活如常，全世界也可以恢复正常。祝福大家不论身在世界何处，都平安健康，万事顺利。等到疫情趋缓，都可以恢复交流，一切如昔。 蔡英文向台湾人民及全球各地过农历新年的好朋友拜个早年，并分别用客家话、粤语和英语祝福。	2021-02-11	信报	两岸消息		329
粤语架桥梁 盼文化交流更火热	http://www.takungpao.com.hk/news/232108/2021/0302/557509.html	“现在两地青年往来拓展生活和工作圈子的热潮已经形成，希望国家能够帮助扶持教育培训机构，促进香港与内地的文化交流越来越频繁。”──陈思珩 2014年9月，一个清秀的女孩迈进了中国传媒大学的校门。她叫陈思珩（圆图），是土生土长的香港女生，凭藉优异的成绩和想了解祖国的强烈欲望来到了北京。陈思珩在与内地同学相处中发现，不少内地同学都对粤语很感兴趣，都有深入了解港澳文化的想法，于是就试着在学校召集了一次粤语歌比赛，获得了意料之外的成功，让陈思珩很快和同学们融为一体。 在北京期间，陈思珩发现虽然很多人都有学习粤语的需求，但是这方面的市场供给却很少。于是，自己就选择当起了一名粤语老师。陈思珩性格温润，加上方法得宜，因此深受学生喜爱。从业两年已有近200名学生从她这里学到纯正的粤语，并顺利迈上了赴港求学、工作的征程。如今，陈思珩的学生从小童到青年，从学生到公职人员，覆盖面越来越广，这个甜美的香港女孩在北…	2021-03-02 00:00:00	大公报	新闻		688
【创客新力量】粤语夹杂英语有光AI识别无难度 温豪夫﹕冀成年轻人创业榜样	http://www.hkcd.com/content/2021-03/29/content_1258361.html	AlphaGo于2016年打败围棋世界冠军李世石，掀起全球热话，也令AI浪潮席卷。在这个时间点上，本港AI初创企业有光科技(Fano Labs)在经历了数十种产品方向尝试后迎来曙光。念电子工程学出身的有光科技创始人兼行政总裁温豪夫博士，决定深耕语音识别(ASR)及自然语言处理(NLP)，以客户服务为切入点，搭建企业与客户有效的沟通桥梁，为社会创造价值。 香港商报记者 邱媛媛 与常规创业者不同，从小就对各种科技感兴趣的温豪夫，一直心存创业梦。临近本科毕业时，他的老师兼其后博士导师李安国教授问他：“你为什么想创业？”他回答说，当年深受苹果公司联合创办人之一乔布斯的启发，希望用技术给社会带来影响，为社会创造价值，并认为成为乔布斯那样的人是很酷的事。 虽然创业信念坚定，但尚未有具体目标的温豪夫，选择大学毕业后继续深造。取得博士学位之际，恰逢港府推出“大学科技初创企业资助计划”，他决定申请，结果获…	2021-03-29	香港商报	即时新闻		2270
12367服务平台上线 为港澳台人士提供粤语英语服务	https://www.wenweipo.com/a/202104/08/AP606e96cbe4b04e1918cfb3bd.html	（香港文汇网记者 赵一存 北京报道）记者8日从国家移民管理局获悉，为进一步便利中外人员获取移民管理信息、享受便捷政务服务，国家移民管理机构12367服务平台和国家移民管理局英文版门户网站自当日起正式上线运行。据了解，12367服务平台作为统一受理移民管理领域服务诉求的综合性服务平台，将全面连接全国范围内边检机关和各地公安出入境管理部门现有谘询投诉热线座席，并提供全天候人工服务。其中，还为港澳台人士提供粤语及英语服务。 “12367服务平台是统一受理移民管理领域业务谘询、意见建议等服务诉求的综合性服务平台，是中国移民管理面向全国、辐射全球的一体化『客服中心』。”据介绍，平台针对当前移民管理服务谘询电话各地号码不统一、不好记，拨打长占线等不便利问题，运用互联网云部署和人工智能技术，全面连接全国边检机关和各地公安出入境管理部门现有谘询投诉热线座席，一号接入、分类受理中外人员提出的移民管理相关政…	2021-04-08	文汇报	即时两岸		912
QQ音乐与TVB开启深度合作 携手推动粤语音乐发展	https://www.wenweipo.com/a/202104/13/AP60757e91e4b0476859b61ec4.html	? 4月13日，QQ音乐与电视广播有限公司（以下简称 TVB）在 TVB 总部共同召开记者会，正式宣布双方将开启深度合作，共建粤语音乐娱乐内容新生态。目前，QQ音乐平台已经上线了香港电视史上最长寿之TVB音乐节目《劲歌金曲》的每周“劲歌金榜”官方歌单，TVB经典视频与音频内容也将全线上架QQ音乐；同时，TVB星梦艺人亦将陆续入驻QQ音乐扑通社区，与全网粉丝开展互动。据悉，未来双方还将在榜单、歌单、社区、直播等方面展开更丰富的合作。 双方开启深度合作，TVB艺人将陆续入驻QQ音乐 ? “有华人的地方，就有TVB！”TVB是全球最大的中文商营传媒之一，培养出非常多极具影响力的歌手艺人，更打造了王牌音乐节目《劲歌金曲颁奖典礼》，为粤语流行音乐作出了重大贡献。 QQ音乐集合众多TVB经典OST和影视原声剧 腾讯音乐娱乐集团副总裁侯德洋（Dennis Hau）先生表示：“我们将引入TVB优质粤语流…	2021-04-13	文汇报	即时两岸		936
港澳、外籍人士在深接种疫苗攻略来了！现场还提供英语粤语服务	http://www.hkcd.com/content/2021-04/13/content_1261796.html	2021年4月13日，全省启动了在粤居住的港澳及外籍居民新冠病毒疫苗接种工作，香港大学深圳医院（以下简称“港大深圳医院”）成为全市首批在深居住的港澳籍及外籍人士新冠病毒疫苗定点接种医疗机构之一。 继驻点口岸助力联防联控、开设跨境学生核酸门诊助力复工复课后，4月13日起，港大深圳医院启动新冠病毒疫苗接种门诊（以下简称“疫苗门诊”），并于首日迎来多位港澳及外籍人士。同时医院急诊部也开设三语(普通话、英语、粤语）24小时接种后反应服务热线86913111，如居民接种疫苗后有不良反应可随时电话咨询。 仅提供少量现场预约 现场可提供英语粤语引导服务 疫苗门诊位于国际医疗中心（IMC)V栋一楼成人疫苗门诊内，服务时间为每周一到周五8：30-12：30；13：30-17：30，具体服务时间将根据疫苗存量动态调整，以“粤健通”平台公布的号源为准。疫苗门诊目前开设5个接种台，每日可提供400号源，有接种需…	2021-04-13 00:00:00	香港商报	湾区动态		2143
有片｜国安公署署长郑雁雄以粤语祝香港市民顺风顺水平平安安	http://www.hkcd.com/content/2021-04/17/content_1262558.html	中央驻港国家安全公署署长郑雁雄15日在“全民国家安全教育日”，首次用粤语发表演讲，向香港市民表达祝福及解释国家安全的重要性，并感谢香港市民对国安公署的支持。 郑雁雄说，国安公署成立以来，香港社会由乱到治，人心思定，“港人对香港国安法从陌生、猜测、观望，到接受、欢迎、支持，经历了一个好自然、好合理的过程，得出众望所归的效果”。 郑雁雄表示，一个国家的主权安全、政治安全、政权安全、发展利益安全都属于国家安全。所谓国泰民安，就是讲国家安全稳如泰山，才有人民的安宁，国家安全是一个国家发展的基石，也是人民安居乐业的基石。适值“全民国家安全教育日”，他祝福香港市民顺风顺水，平平安安！ 郑雁雄15日在“全民国家安全教育日2021”开幕礼上致辞时表示，香港国安法是香港维护国家安全的法律保障，也是区分是不是“爱国者””的法律依据。遵守香港国安法是“爱国者”基本标准，也是人人必须尽到的基本责任。“驻港国安公…	2021-04-17 00:00:00	香港商报	香港		464
国安日港台推《世纪长征》粤语版回顾中国历史	http://www.hkcd.com/content/2021-04/17/content_1262624.html	据紫荆新媒体报道，4月15日全民国家安全教育日当天，香港电台举办“《世纪长征》名人堂”宣传活动，公布《世纪长征》粤语版视像特辑将由5月17日起，逢星期一至五下午1时，于港台电视31播出。另外，《世纪长征》普通话版视像特辑已于今年2月12日开始，逢星期一、三、五下午2时30分，在香港电台普通话台《寰听世界》节目时段播出。 《世纪长征》特辑是“世纪长征”系列活动筹委会与香港电台联合制作的一套100集中国近现代史视像节目，以中央电视台大型纪录片集《百年中国》为基础题材，重新辑录成每集5分钟的100集视像特辑，阐述过去100年的中国近现代历史，让青少年同广大市民轻松科普中国历史知识，深入了解国家发展盛况。 “世纪长征”系列活动筹委会召集人梁唐青仪(右)为资深媒体人车淑梅(左)颁发感谢状 粤语特辑更请来17位来自社会不同界别的“香港十大杰出青年”作声音导航，分别是︰梁国成、林钜津、容永祺、陈念慈、…	2021-04-17	香港商报	即时新闻		1133
国安日港台推《世纪长征》粤语版回顾中国历史	http://www.hkcd.com/content/2021-04/17/content_1262624.html	据紫荆新媒体报道，4月15日全民国家安全教育日当天，香港电台举办“《世纪长征》名人堂”宣传活动，公布《世纪长征》粤语版视像特辑将由5月17日起，逢星期一至五下午1时，于港台电视31播出。另外，《世纪长征》普通话版视像特辑已于今年2月12日开始，逢星期一、三、五下午2时30分，在香港电台普通话台《寰听世界》节目时段播出。 《世纪长征》特辑是“世纪长征”系列活动筹委会与香港电台联合制作的一套100集中国近现代史视像节目，以中央电视台大型纪录片集《百年中国》为基础题材，重新辑录成每集5分钟的100集视像特辑，阐述过去100年的中国近现代历史，让青少年同广大市民轻松科普中国历史知识，深入了解国家发展盛况。 “世纪长征”系列活动筹委会召集人梁唐青仪(右)为资深媒体人车淑梅(左)颁发感谢状 粤语特辑更请来17位来自社会不同界别的“香港十大杰出青年”作声音导航，分别是︰梁国成、林钜津、容永祺、陈念慈、…	2021-04-17 00:00:00	香港商报	香港		1125
更贴近香港的法国五月 法式喜剧粤语演绎	https://news.mingpao.com/pns/%e5%89%af%e5%88%8a/article/20210507/s00005/1620325774766/%e6%9b%b4%e8%b2%bc%e8%bf%91%e9%a6%99%e6%b8%af%e7%9a%84%e6%b3%95%e5%9c%8b%e4%ba%94%e6%9c%88-%e6%b3%95%e5%bc%8f%e5%96%9c%e5%8a%87%e7%b2%b5%e8%aa%9e%e6%bc%94%e7%b9%b9	【明报专讯】法国五月艺术节，是疫下最大型的艺术节之一，视觉艺术、戏剧、音乐剧、管弦乐、爵士乐，艺术形式应有尽有。除了法国文化协会主办的节目之外，亦有邓树荣戏剧工作室的法国浪漫喜剧《超自然之恋》，是艺术节中难得的粤语节目，香港管弦乐团则带来3场截然不同的音乐表演。因为疫情，部分演出会有更多本地艺术家及乐手参与。 香港的法国五月艺术节，由1993年开始举办，至今已有28年。今年有什么特别呢？法国文化协会行政总监Jean-Sébastien Attié简介今年活动，重头戏是向法国著名作曲家Michel Berger致敬的音乐剧《他站着弹琴》，表演门票已经售罄。 Jean-Sébastien Attié表示，法国文化协会多年来尝试拉近法国与香港的文化距离，今年因为疫情，起用更多本地艺术家。在《他站着弹琴》中，共有30多名来自香港和法国的艺术家；而在《法影爵士乐 feat. 雷柏熹爵士大乐团》中，…	2021-05-07	明报	文化		1485
反修例金钟堕下亡梁凌杰死因研讯 陪审员听不懂粤语须解散陪审团	https://www.am730.com.hk/news/%E6%96%B0%E8%81%9E/%E5%8F%8D%E4%BF%AE%E4%BE%8B%E9%87%91%E9%90%98%E5%A2%AE%E4%B8%8B%E4%BA%A1%E6%A2%81%E5%87%8C%E6%9D%B0%E6%AD%BB%E5%9B%A0%E7%A0%94%E8%A8%8A-%E9%99%AA%E5%AF%A9%E5%93%A1%E8%81%BD%E4%B8%8D%E6%87%82%E7%B2%B5%E8%AA	梁凌杰逝世翌日，民阵指游行有“200万+1人”上街示威反修例。(资料图片) 2019年反修例示威初期，35岁男子身穿黄色雨衣的梁凌杰在金钟太古广场一个棚架堕下死亡，死因庭昨展开首日研讯，早上先选出3男2女陪审团，之後首名证人、梁凌杰堕楼後接报到场的警员亦已开始作供，惟开庭半日後，一名女陪审员表示未能完全听懂广东话，无法聆听整份口供，希望退出陪审团。死因裁判官指，考虑到目前只是研讯了很小部分，宁愿牺牲半天研讯时间，都希望有完整陪审团，决定押後至今早重新遴选陪审团，再展开研讯。 另外，在遴选陪审团时亦发生小插曲，一名侯选的陪审员迟到约5分钟，他解释早上步行到法院时头晕迟到，或与数日前接种了首剂新冠疫苗有关。裁判官询问他是否需要叫救护车，并建议他向法庭补交医生证明，又指会在日後需要陪审团时，再次传召他到庭。 事发在前年6月15日，梁凌杰在金钟太古广场一个平台堕下，送院抢救後不治。整个死亡研讯预…	2021-05-11	am730	新闻		468
《一代天娇——红线女》粤语版发布	https://www.wenweipo.com/a/202105/28/AP60b0a9f4e4b0a46dabec4e95.html	（香港文汇网记者 黄宝仪 广州报道）“有华人的地方就有粤剧，有粤剧的地方就能听到她的声音。”10集人文艺术纪录片《一代天娇——红线女》粤语版28日在广州发布。这是为庆祝中国共产党成立100周年特别制作的粤语配音版本，进一步打造富含广府韵味的岭南名片，再现一代粤剧艺术大师的红色人生传奇。 10集人文艺术纪录片《一代天娇——红线女》由出品方红线女艺术中心赠与广州图书馆收入馆藏，此後市民可在广州图书馆免费预约观赏（黄宝仪摄） 《一代天娇——红线女》由红线女艺术中心出品，是世界首部横跨亚、欧、美三大洲的粤剧人文纪录片，也是最全面展现粤剧人物的纪录片。摄制团队跟随红线女生前的步伐，赴北京、广州、贺州、香港、澳门、马来西亚、新加坡、加拿大、俄罗斯等地区和国家实地走访，采访了近150位专家亲友，查阅了数百万字的相关文字资料、大量的图片照片和影像资料。 片中除了展现了许多从未公开的照片、影像资料，还采用…	2021-05-28	文汇报	即时两岸		557
《一代天娇—红线女》 发布粤语版弘扬广府文化	http://117.122.212.150/a.php?f=20210602/mf-1.txt	图：红线女是粤剧的旗帜，同时她也是一名旗帜鲜明的共产党员。 【大公报讯】记者黄宝仪广州报道：10集人文艺术纪录片《一代天娇─红线女》日前发布粤语版。这是为庆祝中国共产党成立100周年特别制作的粤语配音版本，进一步打造富含广府韵味的岭南名片，再现一代粤剧艺术大师的红色人生传奇。粤剧人希望通过该片，进一步弘扬、推广广府文化，推动粤港澳大湾区文化协同发展，增强中华民族文化自信及文化认同感，使粤剧及红线女的精神传播到更多地方。 “有华人的地方就有粤剧，有粤剧的地方就能听到她的声音。”艺术大师红线女是粤剧的旗帜，被誉为岭南文化的瑰宝，同时她也是一名旗帜鲜明的共产党员。1955年，红线女放弃在香港如日中天的名伶生活，毅然回到广州投身於祖国戏曲事业的建设当中。1959年，红线女在粤剧界第一位党员演员白驹荣的介绍下，正式加入中国共产党。至此，她的一生便追随中国共产党的脚步，与国家、人民的命运紧密相连。 …	2021-06-02	大公报	文化		930
【Emily】何柱国：林郑讲到自己粤语残片咁	https://news.mingpao.com/pns/%e6%b8%af%e8%81%9e/article/20210609/s00002/1623177620296/%e3%80%90emily%e3%80%91%e4%bd%95%e6%9f%b1%e5%9c%8b-%e6%9e%97%e9%84%ad%e8%ac%9b%e5%88%b0%e8%87%aa%e5%b7%b1%e7%b2%b5%e8%aa%9e%e6%ae%98%e7%89%87%e5%92%81	【明报专讯】特首林郑月娥日前出席民建联“治政”研习课程，有报道引述佢话预咗自己一世被美国制裁，做特首同亲戚冇往来。全国政协常委何柱国前日喺商台节目《光明顶》话，对林太讲嘅嘢“冇注意好耐”，“因为佢讲来讲去三幅被，一系佢自己点威、点辛苦”，形容林太讲到自己似“粤语残片”、好悲惨咁。何柱国斥对方“自己攞嚟”，强调当时已提醒林太修订《逃犯条例》会引来美国制裁香港，反问林太“你怨咩辛苦啫？”，做得领导都知道为国家、人民系辛苦，唔系歎世界。 吁港人睇埋下届特首先谂移民否 喺土地房屋方面，何柱国狠批林太叫停郊野公园边陲发展研究，否则??家已经有屋可以入住，而做“明日大屿”需时甚久，揶揄系“明日大愚”。至于移民潮，佢话好多人连外国都未住过，离乡别井走去英国，“唔系你谂得咁美好?，揾份工都难”，奉劝港人唔好冲动离港，“你睇一两年后边个接任特首”，先至再决定系咪移民。	2021-06-09	明报	港闻		392
迎接建党百年 央视推出粤语普通话双语广播剧《安妮的花海》	http://www.hkcd.com/content/2021-06/15/content_1274661.html	安妮，是你吗~~ 安妮，是你吗~~ 安妮，你在哪里~~ 你，听说了吗? 大山里来了一位90后 她来自香港 在乌蒙山创业 用三年的时间 为乡亲们打造了一个“花花世界” 她就是安妮 剧情简介 香港女孩安妮成长于单亲家庭，因不满事事被母亲安排而与母亲情感疏离，并对未来感到迷茫。没想到，一次赌气与母亲定下的“一年之约”，竟促成她开始了乌蒙山深处的一场创业。在这一过程中，她认识了许多奋战在一线的扶贫干部，在她创业遇到困难之时，总有人向她伸出援手，让她更真切地体会到“国家”这两个字对她意味着什么。在贵州毕节赫章大山里三年的扶贫经历，安妮用自己独特的方式“逐梦新时代”，勇敢并坚定地担负起时代赋予的使命。这一过程不但让她找到了自己的价值，也改变了对母亲的看法，更从心底亲近了祖国。 △大湾区之声主持人参与录制广播剧 粤语、普通话双语广播剧《安妮的花海》已经录制完成，将在大湾区之声、台海之声广播和云听、央视…	2021-06-15	香港商报	即时新闻		514
迎接建党百年 央视推出粤语普通话双语广播剧《安妮的花海》	http://www.hkcd.com/content/2021-06/15/content_1274661.html	安妮，是你吗~~ 安妮，是你吗~~ 安妮，你在哪里~~ 你，听说了吗? 大山里来了一位90后 她来自香港 在乌蒙山创业 用三年的时间 为乡亲们打造了一个“花花世界” 她就是安妮 剧情简介 香港女孩安妮成长于单亲家庭，因不满事事被母亲安排而与母亲情感疏离，并对未来感到迷茫。没想到，一次赌气与母亲定下的“一年之约”，竟促成她开始了乌蒙山深处的一场创业。在这一过程中，她认识了许多奋战在一线的扶贫干部，在她创业遇到困难之时，总有人向她伸出援手，让她更真切地体会到“国家”这两个字对她意味着什么。在贵州毕节赫章大山里三年的扶贫经历，安妮用自己独特的方式“逐梦新时代”，勇敢并坚定地担负起时代赋予的使命。这一过程不但让她找到了自己的价值，也改变了对母亲的看法，更从心底亲近了祖国。 △大湾区之声主持人参与录制广播剧 粤语、普通话双语广播剧《安妮的花海》已经录制完成，将在大湾区之声、台海之声广播和云听、央视…	2021-06-15 00:00:00	香港商报	湾区动态		506
粤语栋笃笑风靡大湾区 传播粤式幽默文化	https://www.wenweipo.com/a/202110/28/AP617a6bdce4b0c0f6bc923cd0.html	（香港文汇网记者 卢静怡 广州报道）随着《脱口秀大会》第四季的落幕，脱口秀已经成为内地今年火爆的综艺节目之一。在粤港澳大湾区，脱口秀的另一个粤语名称“栋笃笑”在线下也非常火爆。2020年10月至2021年7月，全国的脱口秀演出票房已高达1.2亿元，正式参与商演的脱口秀演员超过了500人。随着疫情防控的常态化，近两年的脱口秀行业发展也在一定程度上受到影响。音频平台的直播间和脱口秀节目成为了新的渠道。 香港演员黄子华的栋笃笑，成为不少後来从事脱口秀的从业者的模仿对象。图为广州一个粤语脱口秀现场。（受访者供图） 粤语栋笃笑风靡大湾区年轻人 传播粤式幽默文化 脱口秀又叫单口喜剧，在粤港澳地区又以“栋笃笑”而广为人知，即一人一麦在台上表演原创段子。其特点是笑点密集，平均每分钟有3-4个笑点。广州脱口秀厂牌纯粹幽默社的联合创始人丁当大人和知名喜剧演员加马，都是香港栋笃笑始创者黄子华的粉丝，其表演风格…	2021-10-28	文汇报	即时两岸		1143
读报纸学粤语 赞星爷笑话“正”	http://www1.hkej.com//dailynews/finnews/article/2966387/	Kerwin是菲律宾华侨，访问中绝大部分时间说广东话，虽然常会中英夹杂，口音算得上相当地道，原来背后花了不少努力，包括以最传统方法读报练习；他忆述，有两年每天读一小时报纸，因本身会说普通话，学起来不太艰辛，“现时仲会同同事吹水练习下”，惟他笑言：“广东话模式会慢一拍，因为个脑会谂咗普通话点讲先。” 学粤语除方便跟同事和商业伙伴沟通，更让他展开广东话电影的“奇妙旅程”，最大得着是可以享受影星周星驰的原汁原味电影。Kerwin表示，以往看星爷电影都是普通话配音，觉得对方演起来相当“生鬼”，直到学会广东话才发觉原著“更正”，“哗！乜原来好笑咁多。” 随口演绎“喼神”桥段 兴之所至，他随手拈来其中一套戏的剧情，演绎“真．周星驰”神髓，譬如：“呢个系喼中之神，简称喼神（英文Gibson谐音）”，他认为，“广东话先咁好笑，转做普通话直头无咗个笑位。”	2021-11-15	信报	财经新闻		397
引以为傲的港式粤语配音	https://hd.stheadline.com/news/columns/1139/20211122/958045/專欄-羚邦夢工場-引以為傲的港式粵語配音	随著串流平台的兴起，“煲剧”早就成为香港人生活的一部份，不知道大家看外语剧时，是比较喜欢听原声还是配音版本？我因为长年从事媒体发行业务，纵然喜欢原声版本的原汁原味，但对于香港地道的粤配版本始终多一点偏爱。 动画的粤配版本早在八九十年代已深入民心。当年电视为香港普罗大众的主流娱乐，按香港广播事务管理局要求，所有在电视播放的动画卡通内容，必须配上粤语配音。配音员在动画中的精采对白，例如，“今日的我是没有极限”、“回复你本来的真面目，古罗卡”及“机会来了，飞云”，早已成为不少流传至今的金句。 羚邦集团一直也有为旗下发行的IP进行配音，如《钢之炼金术师》剧场版电影、《妖怪手表》电影及《机动战士高达UC》电影等。而随著近年大家对粤语配音再度关注起来，羚邦集团作为行业的先躯， 亦听取市场的意见，为我们旗下的电视动画系列进行粤配，当中不得不提的就是火热度爆满的《咒术回战》。 《咒术回战》粤配版更邀请了…	2021-11-22	头条日报	羚邦梦工场	赵小燕	660
设“湾区服务”专窗 职员粤语辅助	http://117.122.212.150/a.php?f=20211126/zm-15.txt	图：港澳居民可以在深圳5593台自助服务终端就近办理高频社保业务。图为深圳市社保局南山分局自助打印机。\大公报记者郭若溪摄 【大公报讯】记者郭若溪深圳报道：2021年，按照广东省的统一部署，深圳市社保局以强化社保跨境办服务能力为重点，不断强化社保“跨境办”服务能力，全面推进“湾区社保服务通”。在深圳市社保局官网设立专区，实现港澳居民社保业务100%“网办”，上线广东政务服务网、粤省事、i深圳、“深圳社保”微信公号等线上渠道；在深圳社保各经办大厅窗口设立“湾区服务”专窗，安排会粤语的工作人员和志愿者提供导引，协助港澳人员谘询、办理社保业务。 据深圳市人社局党组成员、市社保局局长吴登记介绍，深圳市社保局已与6家银行合作开展“社银自助服务终端一体化”项目，将社保自助服务功能嵌入银行自助服务终端。港澳居民可以在深圳全市2434个自助服务网点、5593台自助服务终端就近办理高频社保业务。 据了解，…	2021-11-26	大公报	中国		699
立会选举论坛 六人非粤语发言	http://www1.hkej.com//dailynews/politics/article/2976811/	新选举制度下占立法会议席最大比例的选举委员会界别，有51人竞逐40个议席。全部51名候选人周五（26日）出席首场选举论坛并分组辩论，论坛上除常见的粤语外，有6名候选人以普通话或英语发言。另外，曾任新闻统筹专员的候选人冯炜光在论坛上提出，日后甲级政务官晋升前须到西藏等地挂职半年。 选委界议席首场辩论 选委会界别候选人论坛由香港再出发大联盟举办，51名候选人分成13组自我简介，并就不同指定议题发表意见。论坛上不见以往激辩气氛，没有出现疊声辩论，各人轮流各抒己见。今次选举有不少候选人被视为持“新香港人”背景，论坛上就有4人以普通话发言，包括凤凰卫视主持人曾瀞漪、城大教授孙东、政协屠海鸣和交银国际董事长谭岳衡，此外有两人以英语发言，分别是前投资推广署署长卢维思及兰桂坊集团主席盛智文。 身兼基本法推广督导委员会委员的新世界发展有限公司研究主管洪雯则以不纯正广东话发言。洪雯形容自己是“港漂”或新香港…	2021-11-27	信报	政坛脉搏		812
“港式广东话”俚语字典惊现国际顶尖大学网站 粤语粗口英译爆趣 06:00	https://std.stheadline.com/realtime/article/1875885/%E5%8D%B3%E6%99%82-%E6%B8%AF%E8%81%9E-%E6%B8%AF%E5%BC%8F%E5%BB%A3%E6%9D%B1%E8%A9%B1-%E4%BF%9A%E8%AA%9E%E5%AD%97%E5%85%B8%E9%A9%9A%E7%8F%BE%E5%9C%8B%E9%9A%9B%E9%A0%82%E5%B0%96%E5%A4%A7%E5%AD%B8%E7%B6%B2%	加拿大名校滑铁卢大学的网站上载了一本“港式广东话俚语”英译字典，翻译了逾5千个港式字词如泵波钟、嗒糖等，其中最瞩目是英译大量粤语粗口，鬼马生动，迅即热爆网络。 【点击即睇｜《广东话俚语字典》生鬼英译港式俚语↓↓↓↓】 加拿大排名第一的滑铁卢大学网站上载了一本“港式广东话俚语”英译字典。(滑铁卢大学FB图片) 这本上载的字典名为“Dictionary of Cantonese Slang”(《广东话俚语字典》)，共353页，字典未有注明出版机构及编撰人，字典以表列方式提供广东话原词、发音与英文翻译及解意。 字典最瞩目是英译大量粤语粗口。（网上图片） 字典部分内容含错字，例如“点红点『录』”，正确应为“绿”而非“录”；“古『蛊』仔”，正确应为“惑”而非“蛊”。此外，部分字词的英文翻译亦有出错，如“揼石仔”，本意为一步步积少成多，英文翻译却指为“to play mahjong”(打麻雀)。 滑…	2022-09-29	星岛日报	即时港闻		922
央视专题片《解码十年》 粤语版发布	http://117.122.212.150/a.php?f=20221001/zm-54.txt	图：《解码十年》多语种版本发布现场。\受访者供图 【大公报讯】记者张帅北京报道：9月30日，中央广播电视总台专题片《解码十年》海内外多语种版本发布仪式在北京举行。 粤语版有助港人了解国情 《解码十年》通过数万亿级的海量数据、生动可感的鲜活人物故事，创新应用可视化表达，寻找十年来发生在中国大地上的点滴变化，解读背後蕴藏的发展密码。专题片将推出英语、西班牙语、法语、阿拉伯语、俄语等多语种外语版本，以及粤语、闽南话等汉语方言，与海内外友人共睹非凡十年的中国成就，向世界讲述新时代中国的奋进故事。9月30日起，专题片多语种版本在中央广播电视总台CGTN（中国国际电视台）英语、西班牙语、法语、阿拉伯语、俄语等频道陆续播出。 发布仪式上，全国政协委员、全国青联副主席、香港立法会议员霍启刚在视频发言中指出，《解码十年》形式新颖，内容鲜活，令人耳目一新。期待节目粤语版本的发布，能让更多的香港市民加深对於国…	2022-10-01	大公报	中国		574
抖音禁粤语 被轰不尊重多元文化	http://orientaldaily.on.cc/cnt/china_world/20200402/00178_003.html	【本报综合报道】内媒报道，短片网络直播平台抖音近日推出新规定，要求主播在直播时讲普通话。有粤语主播称当自己讲粤语后遭警告，甚至一度被关闭帐号。有主播批评抖音此举“不尊重多元文化”，要求尊重“中国是个多语言环境的现实”。 有主播反映，直播不讲普通话即被系统警告。直播画面会弹出一个提示框：“请尽量说普通话，照顾一下来自五湖四海的观众。”亦有人因此被指“违反直播行为规范”，遭禁止直播十分钟。平台的整改建议是“请尽量使用普通话”。有粤语类自媒体指出，已不是首次因不说普通话而被禁播。 官方文件并无相关规例 一份非官方的“抖音直播行为规范”显示，其中一条是禁止方言直播，包括长时间使用少数民族语言、地方方言、外语、特殊语种；而官方的文件却没有这条规例。	2020-04-02	东方日报	两岸		340
抖音禁粤语？广东网友气炸怒卸载	https://stepaper.stheadline.com/article/251503133211665/%E4%B8%AD%E5%9C%8B-%E6%8A%96%E9%9F%B3%E7%A6%81%E7%B2%B5%E8%AA%9E-%E5%BB%A3%E6%9D%B1%E7%B6%B2%E5%8F%8B%E6%B0%A3%E7%82%B8%E6%80%92%E5%8D%B8%E8%BC%89	近日，抖音平台以“无法识别语言”为由，限制及封锁多个粤语主播帐号，不少粤语网红拍片怒斥抖音“荒谬”，许多广东网友亦气炸，纷纷卸载软件，称“广东可以没有抖音，但不能没有粤语！” 粤语网红斥抖音“荒谬” “广东靓仔风少”是一名粤语搞笑视频博主，在抖音拥有超过四百六十万粉丝。他在主页里写道：“我们是典型的广东人，希望用轻松搞笑的短视频，将博大精深粤语文化传承下去”。 然而他最近减少在抖音直播，称抖音对粤语主播限流，甚至封号，平台给出的理由竟是“无法识别语言”，不少粤语带货主播也在直播期间遇到类似的情况。 风少怒骂平台：“你咁大个平台，居然话识别唔到粤语”。他表示抖音一直拥有为粤语自动配字幕的功能，但却给出无法识别的理由，简直是“荒谬”。 与此同时，部分主播讨论禁播粤语事件的影片遭到平台下架，下架理由是“涉及虚假信息”，上述风少怒斥抖音的影片也已搜索不到。 有主播找到抖音客服反馈情况，客服表示：…	2022-10-05	星岛日报	中国		820
抖音禁粤语？广东网友气炸怒卸载	https://stepaper.stheadline.com/article/251553133211665/%E4%B8%AD%E5%9C%8B-%E6%8A%96%E9%9F%B3%E7%A6%81%E7%B2%B5%E8%AA%9E-%E5%BB%A3%E6%9D%B1%E7%B6%B2%E5%8F%8B%E6%B0%A3%E7%82%B8%E6%80%92%E5%8D%B8%E8%BC%89	近日，抖音平台以“无法识别语言”为由，限制及封锁多个粤语主播帐号，不少粤语网红拍片怒斥抖音“荒谬”，许多广东网友亦气炸，纷纷卸载软件，称“广东可以没有抖音，但不能没有粤语！” 粤语网红斥抖音“荒谬” “广东靓仔风少”是一名粤语搞笑视频博主，在抖音拥有超过四百六十万粉丝。他在主页里写道：“我们是典型的广东人，希望用轻松搞笑的短视频，将博大精深粤语文化传承下去”。 然而他最近减少在抖音直播，称抖音对粤语主播限流，甚至封号，平台给出的理由竟是“无法识别语言”，不少粤语带货主播也在直播期间遇到类似的情况。 风少怒骂平台：“你咁大个平台，居然话识别唔到粤语”。他表示抖音一直拥有为粤语自动配字幕的功能，但却给出无法识别的理由，简直是“荒谬”。 与此同时，部分主播讨论禁播粤语事件的影片遭到平台下架，下架理由是“涉及虚假信息”，上述风少怒斥抖音的影片也已搜索不到。 有主播找到抖音客服反馈情况，客服表示：…	2022-10-05	星岛日报	中国		820
抖音疑“禁粤” 粤语直播播Beyond遭中断	https://news.mingpao.com/pns/%e4%b8%ad%e5%9c%8b/article/20221005/s00013/1664904764861/%e6%8a%96%e9%9f%b3%e7%96%91%e3%80%8c%e7%a6%81%e7%b2%b5%e3%80%8d-%e7%b2%b5%e8%aa%9e%e7%9b%b4%e6%92%ad%e6%92%adbeyond%e9%81%ad%e4%b8%ad%e6%96%b7	【明报专讯】内地短片社交平台抖音近日传出“禁粤语”，广东媒体称广东占抖音直播电商销售约两成，居全国首位，抖音“禁粤语”不符其利益。 上周四（9月29日），前亚姐罗霖用广东话在抖音直播时，系统出现“直播画面被屏蔽”的信息，并称“直播中包含无法识别的语言或文字，直播多语言识别能力在完善中，将尽快支持多种方言和语种”。不少粤语带货主播在直播时也遇到类似情况；甚至播放粤语歌《光辉岁月》，也被中断。部分主播讨论禁播粤语的短片也遭下架，被强制设为“仅私人可见”，理由是“涉及虚假信息”。 抖音直播销售 粤占两成 “羊城网”报道，翻查抖音《抖音直播行为规范》，未见规定禁用方言直播。抖音客服称“主播可在直播间正常使用粤语直播，平台并不会因为主播讲粤语就进行处罚”。根据《2022年广东直播电商数据报告（抖音）》，广东占抖音直播电商销售约两成，居全国首位。广东媒体称，抖音直播“禁粤语”不符合其商业利益。有消息…	2022-10-05	明报	中国新闻		463
抖音直播再禁粤语 广州网红怒退平台	https://www1.hkej.com/dailynews/cntw/article/3264887/%E6%8A%96%E9%9F%B3%E7%9B%B4%E6%92%AD%E5%86%8D%E7%A6%81%E7%B2%B5%E8%AA%9E++%E5%BB%A3%E5%B7%9E%E7%B6%B2%E7%B4%85%E6%80%92%E9%80%80%E5%B9%B3%E5%8F%B0	拥有逾460万粉丝的抖音网红“广东靓仔风少”日前拍短片披露，在抖音直播间讲粤语系统会弹出“直播中包括无法识别的语言和文字”的提醒，如不改用普通话，轻则中断直播，重则被禁播封号。他认为此举非常荒谬，因此宣布退出抖音平台。 无独有偶，羊城网前日报道，前香港亚洲小姐罗霖9月29日用粤语在抖音进行情感谈话类直播期间，系统出现“直播画面被遮蔽”的讯息，并提示“直播中包含无法识别的语言或文字，直播多语言识别能力在完善中，将尽快支援多种方言和语种。” 疑因临近“大时大节” 其实抖音直播间禁粤语已不是首次，早於2020年3月已曾这样做。有人猜测，一方面是抖音懂地方语言的稽核人员不足，另一方面可能是临近“大时大节”，平台担心出事故，但这两点都不便明说，因此乾脆采取更严厉的稽核策略。 根据《2020年抖音使用者画像报告》统计了抖音用户在全国各省的分布情况，其中广东和河南比重最高，各占8%，所以“抖音直播禁粤…	2022-10-05	信报	两岸消息		484
截断粤语直播 抖音处理惹疑	https://orientaldaily.on.cc/content/兩岸國際/odn-20221005-1005_00178_010/截斷粵語直播--抖音處理惹疑?sort2=兩岸	【本报综合报道】内地多名粤语主播近日透过短视频分享平台抖音直播时，系统往往弹出无法识别语言等提醒讯息，画面甚至遭到屏蔽。 报道指出，当主播使用粤语直播时，往往收到“直播中包括无法识别的语言和文字”等提醒，若不改用普通话，轻则直播遭到中断，重则帐号会被封锁。抖音没有禁用方言直播规定，仅有一条提及语言模糊不清或无法分辨规定，却没有清楚说明定义。经主播查询後，抖音客服澄清主播可用粤语直播，平台不会因此处罚。	2022-10-05	东方日报	两岸		211
内地抖音传禁粤语直播	http://www1.hkej.com/dailynews/article/id/2424777/%E5%85%A7%E5%9C%B0%E6%8A%96%E9%9F%B3%E5%82%B3%E7%A6%81%E7%B2%B5%E8%AA%9E%E7%9B%B4%E6%92%AD	自由亚洲电台报道，近日有内地抖音用户反映，因直播时使用粤语被系统警告，并以“违反直播行为规范”为由，轻则中断直播，重则被禁播、封号；此外，抖音也会弹出“请尽量说普通话，照顾一下来自五湖四海的观众”提示。	2020-04-02	信报	两岸消息		103
疑限制主播粤语直播 抖音引争议	https://paper.hket.com/article/3368217	【本报讯】广东一名网红拍片投诉内地短片平台抖音禁止他使用广东话，声言退出抖音。事件受到众多使用广东话的主播关注，纷纷拍片对抖音的做法表示反对。 抖音称无法识别语言 在抖音上拥有460万粉丝的主播“广东靓仔风少”，近日在个人频道上出片讲述事件，并指一些同样做用广东话的主播已被限制，甚至封锁帐号。他指，抖音对有关措施的解释，竟然是“无法识别语言”。另有主播称，在抖音直播时接到平台“请尽量说普通话，照顾一下来自四海的观众”的通知，随后更被以“违反直播行为规范”禁播。 事件引起争论，有网民支持捍卫广东话，称即使全国性官方语言是普通话，广东话仍是广东人日常语言，并质疑为何连说自己家乡方言的都被当作违规。亦有人认为抖音之所以会封禁部分用广东话的主播，是后者咎由自取，并说他们利用审核人员听不懂广东话的“漏洞”，在直播时满嘴污言秽语，低俗不堪。 国务院去年颁布了《关于全面加强新时代语言文字工作的意见》，…	2022-10-05	经济日报	中国		543
主播屡遭限流 抖音疑封杀粤语 16:08	https://hk.on.cc/hk/bkn/cnt/cnnews/20221004/bkn-20221004160806401-1004_00952_001.html	内地多名粤语主播近日透过短视频分享平台抖音直播时，系统往往弹出无法识别语言等提醒讯息，画面甚至遭到屏蔽。面对外间质疑平台封杀粤语，抖音客服仅称会稍后核实，“反馈给专员解答”。 内媒周一（3日）报道，当主播使用粤语直播时，往往收到“直播中包括无法识别的语言和文字”等提醒，若不改用普通话，轻则直播遭到中断，重则帐号会被封锁。 内媒记者发现，抖音没有禁用方言直播规定，仅有一条提及语言模糊不清或无法分辨规定，却没有清楚说明其定义。经主播查询后，抖音客服澄清主播可用粤语直播，平台不会因此处罚。	2022-10-04	东方日报	即时两岸		260
有片 | 李家超施政报告记者会现场 粤语、普通话、英文切换自如 20:25	http://www.hkcd.com/hkcdweb/content/2022/10/19/content_1368039.html	10月19日下午，香港特别行政区行政长官李家超在政府总部举行记者会解说施政报告，在会上面对记者的提问，李家超粤语、普通话、英文切换自如，对记者们的提问进行回答。	2022-10-19	香港商报	即时视听		82
最爱粤语金曲 感受大湾区文化魅力	http://117.122.212.150/a.php?f=20221022/ym-35.txt	图：Ivan在街头弹唱，吸引了大量观众驻足。/大公报记者卢静怡摄 【大公报讯】“微雨中，身边车辆飞过，街里路人走过，交通灯催促过，剩下独是我跟你……”来自美国的Ivan扫着结他和弦，投入地唱着香港歌手林子祥的歌《敢爱敢做》。一个穿着校服的小女孩，被吸引过来，悄悄地坐在不远处，一边吃着零食，一边神情专注地听着歌。“中国人真的非常友好，这里的氛围就像一个大家庭一样，我渐渐就融入到这里，感觉自己是社区中的一员。这种融入不单是语言，还有文化。所以我学着演唱本地的歌曲。” 对於Ivan来说，香港粤语金曲不少是他的至爱。“我喜欢Beyond、陈奕迅、林子祥、张国荣、谭咏麟……”他笑说，还有很多很多歌手，数不过来。Ivan每次来唱歌，都会带几本厚厚的笔记本，上面是他手抄的曲谱歌词，字迹工整，还整齐地标注着粤语发音。“粤语很有意思的是，它音调很多，发音和普通话区别很大，所以我在粤语歌下的音标标注会更密一…	2022-10-22	大公报	国际		698
生活关键词：粤语忌讳 说话无分对错 却有好坏	https://news.mingpao.com/pns/%e6%95%99%e8%82%b2/article/20221026/s00011/1666716231225/%e7%94%9f%e6%b4%bb%e9%97%9c%e9%8d%b5%e8%a9%9e-%e7%b2%b5%e8%aa%9e%e5%bf%8c%e8%ab%b1-%e8%aa%aa%e8%a9%b1%e7%84%a1%e5%88%86%e5%b0%8d%e9%8c%af-%e5%8d%bb%e6%9c%89%e5%a5%bd%e5	【明报专讯】王晋熙是圣类斯中学旧生，现为香港大学中文教育研究中心学校发展主任、香港都会大学粤语辩论队顾问（兼任），最近出版新书《粤语忌讳现象的语言学研究》。他对粤语忌讳现象的兴趣，由中一成为辩论队成员开始，为了在口舌之战中取胜，他既要词锋锐利，态度又要落落大方，不能得势不饶人，遣词用字需小心计算。如是者，王晋熙慢慢了解到“衰嘢”是什麽。 讲衰嘢=讲错嘢？ 话在口边，想说什麽就说什麽，还有“错嘢”、“衰嘢”之分吗？王晋熙表示，说话没有对错之分，却有好坏之别。当中“好坏之别”，坏的说话指说“衰嘢”——也就是他人会避忌的“忌讳”言语。以下6点，他认为都是大家最为忌讳的言语内容： ．生死 ．鬼神 ．阶层 ．雅俗 ．运势 ．钱财 所谓“崩口人忌崩口碗”，别人最在意介怀的事，最怕被人针对着说三道四。不少人怕死、怕鬼、怕没钱、怕走衰运、怕地位低微、怕不雅……这些人心惧怕的，自然不愿从他人口中听见，渐渐…	2022-10-26	明报	教育		2643
粤语中保留的古汉语词汇	https://stepaper.stheadline.com/article/142633133213770/%E6%95%99%E8%82%B2-%E7%B2%B5%E8%AA%9E%E4%B8%AD%E4%BF%9D%E7%95%99%E7%9A%84%E5%8F%A4%E6%BC%A2%E8%AA%9E%E8%A9%9E%E5%BD%99	“粤语（yuè yǔ）”作为一种方言，主要分布於广东、广西、香港（xiāng gǎng）、澳门等地区，又称为“广东话”、“广府话”。粤语有九音，相比起只有四音的普通话音韵（yīn yùn）更加丰富多彩，音调更加跌宕（diē dàng）有致，因此粤语歌唱起来都很有韵味，用粤语吟诵古诗词也会显得更加古色古香（gǔ sè gǔ xiāng）。粤语源於春秋战国时期的古汉语，至今仍保留许多古汉语词汇（cí huì），今天就让我们来一探究竟（yī tàn jiū jìng）吧。 一、樽，即瓶，“一樽酒”即一瓶酒。陶渊明〈归去来兮辞〉：“有酒盈樽。”李白〈行路难〉：“金樽（jīn zūn）清酒斗十千。” 二、啖，量词，一啖即一口，“饮啖汤”即喝口汤，古汉语中则用作动词，表示吃。苏轼〈惠州一绝〉：“日啖荔枝三百颗，不辞长作岭南人。” 三、行，即走，“行街”即逛街。《论语》：“三人行，必有我师焉。”王维〈…	2022-10-26	星岛日报	教育		1216
美团在港招聘团队 具有国际化经验 懂粤语英文优先 11:04	https://hk.on.cc/hk/bkn/cnt/finance/20221026/bkn-20221026110454059-1026_00842_001.html	内媒报道，美团(03690)已于本月20日(上周四)开始招聘香港工作人员。美团官方招聘平台显示，目前正在招聘中的境外业务岗位共有20个，职位包括产品经理、战略分析、用户运营、商业分析、客服负责人等，并均在工作地点一栏标注了香港，在招聘要求中注明“具有国际化从业经验者优先”、“粤语及英语可以作为工作语言者优先”。 早前内媒报道指，美团(03690)拟进军香港外卖业务。 美团最新报132.2港元，升逾7%。	2022-10-26	东方日报	即时财经		219
【Emily】BBC粤语节目《时事一周》停播 城大张楚勇有份创立 “将专业广播带嚟香港”	https://news.mingpao.com/pns/%e6%b8%af%e8%81%9e/article/20221028/s00002/1666891108553/%e3%80%90emily%e3%80%91bbc%e7%b2%b5%e8%aa%9e%e7%af%80%e7%9b%ae%e3%80%8a%e6%99%82%e4%ba%8b%e4%b8%80%e5%91%a8%e3%80%8b%e5%81%9c%e6%92%ad-%e5%9f%8e%e5%a4%a7%e5%bc%b5%e6%a5	【明报专讯】英国广播公司（BBC）早前宣布架构重组兼裁员，近日再公布粤语节目《时事一周》会喺下月5号后停播，为呢个1993年开始嘅老牌电台节目画上句号，BBC中文部喺香港嘅驻站就继续运作。BBC中文日前喺facebook贴出有关告示，并“感谢香港、英国与各地新知旧雨支持”。 BBC中文部香港驻站续运作 香港未必好多人知，当时有份创立呢个粤语节目嘅人，就系刚荣休嘅城大政治学者张楚勇，佢当时喺伦敦BBC国际频道粤语组担任编辑，制作每周一次嘅粤语新闻时事节目，并喺当时嘅港台转播。不过，港台旧年已无再转播时事一周同BBC国际频道嘅节目喇！ 张教授同Emily讲，《时事一周》都系讲英国方面嘅声音，将专业广播带嚟香港，由於视野同角度唔同，畀香港听众听到香港无咁熟悉或忽略而其他地方关注紧嘅议题。 教授话，从个人而言，节目停播系有啲可惜，但好多人转听网上广播、加上港台都唔再转播BBC节目，BBC从资源角…	2022-10-28	明报	港闻		461
珠海封区3天网友粤语粗口闹爆	https://stepaper.stheadline.com/article/261473133221865/%E4%B8%AD%E5%9C%8B-%E7%8F%A0%E6%B5%B7%E5%B0%81%E5%8D%803%E5%A4%A9%E7%B6%B2%E5%8F%8B%E7%B2%B5%E8%AA%9E%E7%B2%97%E5%8F%A3%E9%AC%A7%E7%88%86	广州正面临抗疫三年来最复杂、最严峻疫情形势，前天新增一千三百二十五宗本土感染个案。海珠区是疫情重灾区，从上周六起封控三天，引发大量网民不满，涌入微博并用粤语粗口闹爆“搞边科”“正一班废柴”。 广州市衞健委昨天表示，从感染者来源看，超过九成的病例来自海珠区。海珠区新增感染者创新高，主要因为Omicron病毒在楼栋密集、巷道狭窄的环境下，极易造成“气溶胶传播”，城中村人口密度较大，也为快速传播创造了条件。为尽快控制疫情，广州全市加大转运隔离力度，近三天已转运三点一万人。 “广州疫情”登微博热搜 根据上周五（四日）发布的“管控令”，海珠区自上周六（五日）至今天（七日）的三天时间内，区内公交、地铁停运，市民除接受核酸检测和紧急就医等，原则上非必要不外出、不聚集，每户每天安排一人分时有序外出购买生活物资或领取无接触式配送物资。 微博话题“广州海珠严格控制人员流动”、“广州疫情”等登上微博热搜，大量…	2022-11-07	星岛日报	中国		707
广东昨新增2106宗本土病例 海珠封区3天网友粤语粗口闹爆 09:22	https://std.stheadline.com/realtime/article/1884328/%E5%8D%B3%E6%99%82-%E4%B8%AD%E5%9C%8B-%E5%BB%A3%E6%9D%B1%E6%98%A8%E6%96%B0%E5%A2%9E2106%E5%AE%97%E6%9C%AC%E5%9C%9F%E7%97%85%E4%BE%8B-%E6%B5%B7%E7%8F%A0%E5%B0%81%E5%8D%803%E5%A4%A9%E7%B6%B2%E5%8F%8B%E7%B	广州正面临抗疫三年来最复杂、最严峻疫情形势，广州正面临抗疫3年来最复杂、最严峻疫情形势，昨日（6日）新增2106宗本土病例，包括224宗本土确诊病例、1882宗本土无症状感染。海珠区是疫情重灾区，从上周六起封控3天，广州荔湾区及海珠区亦新增临时管控区域，引发大量网民不满，涌入微博并用粤语粗口闹爆“搞边科”、“正一班废柴”。 广州市衞健委昨天（6日）表示，从感染者来源看，超过九成的病例来自海珠区。海珠区新增感染者创新高，主要因为Omicron病毒在楼栋密集、巷道狭窄的环境下，极易造成“气溶胶传播”，城中村人口密度较大，也为快速传播创造了条件。为尽快控制疫情，广州全市加大转运隔离力度，近3天已转运3.1万人。 “广州疫情”登微博热搜 根据上周五（四日）发布的“管控令”，海珠区自上周六（5日）至今天（7日）的3天时间内，区内公交、地铁停运，市民除接受核酸检测和紧急就医等，原则上非必要不外出、不…	2022-11-07	星岛日报	即时中国		792
广东昨新增2106宗本土病例海珠封区3天网友粤语粗口闹爆09:22	https://hd.stheadline.com/news/realtime/chi/2384328/即時-中國-廣東昨新增2106宗本土病例-海珠封區3天網友粵語粗口鬧爆	广州正面临抗疫三年来最复杂、最严峻疫情形势，广州正面临抗疫3年来最复杂、最严峻疫情形势，昨日（6日）新增2106宗本土病例，包括224宗本土确诊病例、1882宗本土无症状感染。海珠区是疫情重灾区，从上周六起封控3天，广州荔湾区及海珠区亦新增临时管控区域，引发大量网民不满，涌入微博并用粤语粗口闹爆“搞边科”、“正一班废柴”。 广州市衞健委昨天（6日）表示，从感染者来源看，超过九成的病例来自海珠区。海珠区新增感染者创新高，主要因为Omicron病毒在楼栋密集、巷道狭窄的环境下，极易造成“气溶胶传播”，城中村人口密度较大，也为快速传播创造了条件。为尽快控制疫情，广州全市加大转运隔离力度，近3天已转运3.1万人。 “广州疫情”登微博热搜 根据上周五（四日）发布的“管控令”，海珠区自上周六（5日）至今天（7日）的3天时间内，区内公交、地铁停运，市民除接受核酸检测和紧急就医等，原则上非必要不外出、不…	2022-11-07	头条日报	即时中国		474
广东昨新增2106宗本土病例 海珠封区3天网友粤语粗口闹爆 09:22	https://std.stheadline.com/realtime/article/1884328/%E5%8D%B3%E6%99%82-%E6%B8%AF%E8%81%9E-%E5%BB%A3%E6%9D%B1%E6%98%A8%E6%96%B0%E5%A2%9E2106%E5%AE%97%E6%9C%AC%E5%9C%9F%E7%97%85%E4%BE%8B-%E6%B5%B7%E7%8F%A0%E5%B0%81%E5%8D%803%E5%A4%A9%E7%B6%B2%E5%8F%8B%E7%B	广州正面临抗疫三年来最复杂、最严峻疫情形势，广州正面临抗疫3年来最复杂、最严峻疫情形势，昨日（6日）新增2106宗本土病例，包括224宗本土确诊病例、1882宗本土无症状感染。海珠区是疫情重灾区，从上周六起封控3天，广州荔湾区及海珠区亦新增临时管控区域，引发大量网民不满，涌入微博并用粤语粗口闹爆“搞边科”、“正一班废柴”。 广州市衞健委昨天（6日）表示，从感染者来源看，超过九成的病例来自海珠区。海珠区新增感染者创新高，主要因为Omicron病毒在楼栋密集、巷道狭窄的环境下，极易造成“气溶胶传播”，城中村人口密度较大，也为快速传播创造了条件。为尽快控制疫情，广州全市加大转运隔离力度，近3天已转运3.1万人。 “广州疫情”登微博热搜 根据上周五（四日）发布的“管控令”，海珠区自上周六（5日）至今天（7日）的3天时间内，区内公交、地铁停运，市民除接受核酸检测和紧急就医等，原则上非必要不外出、不…	2022-11-07	星岛日报	即时中国		792
一代粤语片女星嘉玲昨离世 契女赶赴泰国送别 12:43	https://www.wenweipo.com/a/202211/22/AP637c538be4b0e80f811636f6.html	（香港文汇报 娱乐组）一代粤语片女星嘉玲昨日（21日）於泰国家中在睡梦中离世，享年八十七岁，契女郭秀云於昨日凌晨接获噩耗后感到非常难过，并尽快赶到泰国慰问契爷，送别契妈最后一程。自从息影后，嘉玲与泰国华侨姚武麟结婚，自此随丈夫移居到曼谷，近年健康转差，岂料昨日传来不幸消息。 契女郭秀云心情难过表示：“我是昨天（21日）早上六、七时收到消息，照顾她的护士在半夜发现她在睡梦中离世，当时契爷仍在睡觉，她立即通知身在纽西兰的契姐（嘉玲二女），我收到消息后未能联络契爷，他没有开电话，我最担心他，因为疫情几年他的身体也大不如前，幸好契哥（二儿子）已赶回到家陪伴父亲，我会尽快赶到泰国慰问契爷。”郭秀云透露契妈是因慢性阻塞性肺疾病离世，她说：“契妈近年身体一直转差，最后一次见她是2019年的时候，因为我和契爷与契妈都是12月生日，那次专程去泰国和他们庆祝，契妈觉得自己不像以前灵活很少上街，闲时喜欢看剧集…	2022-11-22	文汇报	即时香港		832
粤语片红星嘉玲泰国睡梦中离世 享年87岁 12:34	https://www2.hkej.com/instantnews/current/article/3306342/%E7%B2%B5%E8%AA%9E%E7%89%87%E7%B4%85%E6%98%9F%E5%98%89%E7%8E%B2%E6%B3%B0%E5%9C%8B%E7%9D%A1%E5%A4%A2%E4%B8%AD%E9%9B%A2%E4%B8%96+%E4%BA%AB%E5%B9%B487%E6%AD%B2	着名粤语片红星嘉玲昨日於泰国家中在睡梦中离世，享年87岁。 嘉玲契女郭秀云向传媒表示昨晨接获噩耗，契妈因慢性阻塞性肺疾病离世，对此感到非常难过。 郭秀云指契妈近年身体一直转差，最后一次见她是2019年，惟因疫情未能再前往探望，原本计划12月再到泰国庆祝生日，没料到契妈先走一步。 嘉玲於1935年广东南海出生，原名何佩英，祖父为民国时期中国驻美国领事，在真光女子中学毕业后，於1953年考入“岭光公司”演员训练班，同期同学有谢贤，亦是谢贤公开承认的第一位女朋友。 嘉玲第一部电影是1955年拍摄的《三妻奇案》，同年受着名导演秦剑邀请与谢贤加盟“光艺制片公司”，着名作品包括《血染相思谷》、《酒店情杀案》、《五月雨中花》、《追妻记》、《花花公子》、《弹剑江湖》、《英雄本色》等。 最后的一部作品是《人海奇花》。 嘉玲嫁给泰国华侨姚武麟后，随丈夫移居到曼谷并归化泰国籍，育有二女一子。\	2022-11-22	信报	即时时事脉搏		428
粤语片红星嘉玲泰国离世演员黄栢文神秘长子身份曝光	https://www1.hkej.com/dailynews/views/article/3306819/%E7%B2%B5%E8%AA%9E%E7%89%87%E7%B4%85%E6%98%9F%E5%98%89%E7%8E%B2%E6%B3%B0%E5%9C%8B%E9%9B%A2%E4%B8%96	一代粤语片女星嘉玲本周一（21日）於泰国家内睡梦中离世，享寿87岁。嘉玲自从1967年息影后，随丈夫移居到泰国曼谷，甚少公开露面。其契女郭秀云透露，嘉玲近年身体抱恙，受慢性阻塞性肺疾病之苦，不时要靠仪器协助呼吸，终不敌病魔离世。不少名人闻讯悼念：“嘉玲姐，一路好走。” 嘉玲原名何佩英，上世纪五十年代初投考电影公司“岭光影业公司”演员训练班，1955年正式踏入影坛，首部作品《三妻奇案》已经担正女主角，随即一炮而红，其后以艺名嘉玲纵横影圈。 从影以来，嘉玲主演超过60部粤语电影，高贵典雅形象深入民心，是光艺制片公司的当家花旦。 1967年息影 享寿87岁 1963年，嘉玲与泰国华侨姚武麟结婚，其后於1967年息影，移居泰国曼谷，与丈夫育有两女一子。 嘉玲离世消息传出后，其神秘儿子曝光。原来嘉玲婚前曾诞一子，资深演员黄栢文【下图】昨低调承认二人的母子关系。他坦言，不愿揭露太多嘉玲私隐，只透露自…	2022-11-23	信报	独眼		993
【Emily】鬼佬叹油炸鬼 赞粤语生鬼 广东话拍片 美总领事求指教	https://news.mingpao.com/pns/%e6%b8%af%e8%81%9e/article/20221203/s00002/1670001181191/%e3%80%90emily%e3%80%91%e9%ac%bc%e4%bd%ac%e6%ad%8e%e6%b2%b9%e7%82%b8%e9%ac%bc-%e8%ae%9a%e7%b2%b5%e8%aa%9e%e7%94%9f%e9%ac%bc-%e5%bb%a3%e6%9d%b1%e8%a9%b1%e6%8b%8d%e7%89%8	【明报专讯】被誉为“中国通”嘅美国驻港澳总领事梅儒瑞（Gregory May），本身讲得一口流利普通话，佢话近期学咗广东话两个几月，噚日仲上载影片show下成果。 根据美总领馆上载嘅影片，梅儒瑞面前放住港式早餐常见嘅粥、油炸鬼同炒面，一边用夹杂英文口音同普通话口音嘅广东话，同网民打招呼。佢话好开心有机会学广东话同了解香港文化，自己啱啱开始学广东话，“对於我哋鬼佬嚟讲，广东话都真系几难，不过我锺意佢够生鬼，希望学快啲，方便我四围行，同大家倾吓偈”。 网民提议学“五字真言” 梅儒瑞话自己发音麻麻哋，向网民公开徵求有无贴士学得快啲，仲话迟啲会再拍片，叫大家到时睇吓佢有冇进步。有网民就留言赞佢“good try”，不过话佢部分词语似系普通话发音多少少，叫佢要继续加油，亦有网民留言写埋广东话拼音同解释，纠正佢点样讲正啲“啱啱”两个字。另外都有网民开玩笑话，学广东话精萃始终都系要学识“五字真言”（广…	2022-12-03 00:00:00	明报	港闻		451
图集丨立法会举行宣誓仪式 议员以普通话、粤语、英语进行宣誓 13:11	http://www.hkcd.com/hkcdweb/content/2022/01/03/content_1315984.html	第七届立法会90位新当选议员于今早（3日）在立法会会议厅进行宣誓，由行政长官林郑月娥进行监誓。 宣誓仪式大概于早上11时开始。众人于会议厅先奏唱国歌，其后一众议员开始在台前进行宣誓。会上有议员以普通话、粤语、英语进行宣誓。宣誓仪式十分顺畅，直到大概下午12时10分时便完成，历时大概70分钟。如选举委员会界别议员周文港、孙东、谭岳衡以普通话宣誓；张宇人以英语宣誓；大部分议员以粤语进行宣誓。（摄影 冯瀚文）	2022-01-03	香港商报	即时新闻		218
中大办第25届国际粤方言研讨会 推动粤语语法研究进一步发展 15:27	http://www.hkcd.com/hkcdweb/content/2022/01/09/content_1317175.html	香港中文大学指，中国文化研究所吴多泰中国语文研究中心与粤港澳高校中文联盟日前联合主办“第25届国际粤方言研讨会”，暨南大学教授詹伯慧希望透过增加对语句末助词的研究，推动粤语语法研究进一步发展，同时提倡今后在粤语作为重要语言资源、粤语地区文化载体等方面多下功夫。 中大教授邓思颖代表粤港澳高校中文联盟致欢迎辞，提到研讨会由粤港澳高校中文联盟以线上方式筹办，是粤港澳大湾区一个“超地域”合作，既能延续粤语研究传统又有新突破。 邓思颖在“第25届国际粤方言研讨会”开幕礼上致欢迎辞。 据了解，国内外106位学者于8场分组报告中发表论文，涵盖语音学、粤语音韵、词汇学、词法学、句法学、话语分析、第二语言习得、社会语言学、粤语使用及应用语言学等领域，对粤语相关问题进行深入交流与探讨；研讨会更特设粤语句末助词工作坊讨论粤语句末助词句法、韵律等形式特征、语义功能、助词分类、语言习得、历史来源等问题。 “第25…	2022-01-09	香港商报	即时新闻		582
从“干杯”变“饮胜” 分析粤语忌讳系统	https://news.mingpao.com/pns/%e6%95%99%e8%82%b2/article/20220110/s00011/1641751720358/%e5%be%9e%e3%80%8c%e4%b9%be%e6%9d%af%e3%80%8d%e8%ae%8a%e3%80%8c%e9%a3%b2%e5%8b%9d%e3%80%8d-%e5%88%86%e6%9e%90%e7%b2%b5%e8%aa%9e%e5%bf%8c%e8%ab%b1%e7%b3%bb%e7%b5%b1	【明报专讯】中大早前线上举办第25届“国际粤方言研讨会”，研讨会共有8场分组汇报，106名粤语研究学者交流。其中来自理大的王晋熙、梁慧敏的论文以“粤语忌讳的语言学研究”为题，称因由于地理和社会原因，粤语忌讳及委婉语数量极多，甚具独有特色，举例称人们视“水”为财故忌讳“干”，以“饮胜”代替“干杯”。他们从社会语言学角度出发，通过文献整理、问卷调查和行业访谈等研究方法，分析粤语的“忌讳系统”。 粤语研讨会 106学者发表论文 粤港澳高校中文联盟及中大中国文化研究所吴多泰中国语文研究中心联合举办第25届“国际粤方言研讨会”，为汉语语言学界重要学术活动，过去主要在香港、澳门、广东等地轮流举行。 今届研讨会有8场分组报告，来自国内外的106名学者在会上发表论文，涵盖语音学、粤语音韵、词汇学、词法学、句法学、话语分析等领域，对粤语相关问题深入交流与探讨。 趋“吉”避“空”官方亦采用 有份参加研讨会的…	2022-01-10	明报	教育		687
林晓峰：粤语歌正回暖复兴	https://www.wenweipo.com/a/202201/11/AP61dc9889e4b03103e0c33b44.html	香港文汇报讯（记者 胡若璋）记者近日探班正在火热录制中的《2022龙腾虎跃大湾区广东卫视春节晚会》。此番，加盟广东卫视大湾区春晚舞台，鬼马搞笑的林晓峰一度在探班采访间“反客为主”，充当起采访总控。 作为去年行走的流量“大湾仔”，林晓峰在内地知名度全开。歌唱舞台邀约不断，不少主持的舞台也向他抛出橄榄枝。此次以嘉宾主持的方式加盟大湾区春晚，林晓峰笑言，因为在内地做主持需要持证上岗，所以接下来还需要努力考取资格证书。 2022年恰逢香港回归25周年。林晓峰自爆，曾志伟向他发出邀请，希望他能回港参与庆回归活动。他说，不仅是香港，内地也有不少平台和机构都在筹备香港回归25周年庆典活动。可以说，筹备工作都已经铆足力气。 2021年，北上参加《披荆斩棘的哥哥》，林晓峰笑言，自己成为“年纪最大的出道歌手”。过去一年的舞台邀约，也让他深刻感知到粤语歌曲的复兴和回暖。作为香港艺人，他也坦言会好好抓住这一波机…	2022-01-11	文汇报	娱乐		442
拜登线上拜年 贺锦丽以粤语恭贺	https://orientaldaily.on.cc/content/兩岸國際/odn-20220203-0203_00180_023/拜登線上拜年--賀錦麗以粵語恭賀?sort2=國際	【本报综合报道】周二是农历大年初一，美国总统拜登与第一夫人吉尔与白宫官员拜年，恭祝众人在来年和平、繁荣及健康。副总统贺锦丽亦在社交网上传影片，除了感谢白宫工作人员，亦祝贺农历新年，并用粤语说“恭喜发财”。 新春贺词 加插美国核心思想 拜登伉俪发表声明祝贺农历新年快乐，指美国和全球多地民众庆祝新开始，踏入象徵力量和勇气的虎年，让华府继续应对新冠疫情、重建经济、保护民主，包括对抗针对亚裔美国人、夏威夷原住民和太平洋岛民的仇恨；所有人不论种族、背景、宗教或语言生而平等，值得受到公平对待，亦是美国的核心思想。 白宫在社交网上传拜登、吉尔等人拜年的相片，可见白宫挂上新年装饰应节。	2022-02-03	东方日报	国际		306
亚洲电台粤语部下月起暂停现有在地评论 22:18	https://www2.hkej.com/instantnews/current/article/3041195/	自由亚洲电台华府编辑部表示，自由亚洲电台粤语部将于下月1日起暂停现有在地评论与节目的播出，并进行内部检讨，直至另行通知。 编辑部指出，由于香港日益严峻的局势，在地评论员与主持人的“地缘风险”升高。过去一年的发展显示香港“国安红线”无处不在，香港《基本法》给予在地评论员与主持人的言论自由，并无法得到香港与中国法律的保障。	2022-02-10	信报	即时时事脉搏		167
加州港籍商人捐780万 资助史丹福续办粤语课程	https://news.mingpao.com/pns/%e4%b8%ad%e5%9c%8b/article/20220221/s00013/1645380837150/%e5%8a%a0%e5%b7%9e%e6%b8%af%e7%b1%8d%e5%95%86%e4%ba%ba%e6%8d%90780%e8%90%ac-%e8%b3%87%e5%8a%a9%e5%8f%b2%e4%b8%b9%e7%a6%8f%e7%ba%8c%e8%be%a6%e7%b2%b5%e8%aa%9e%e8%aa%b2%e	【明报专讯】美国史丹福大学因财政困难，打算停止该校的广东话课程，原籍香港的加州商人孙振豪（Scott Suen）为此捐助100万美元(约780万港元)，使该课程得以延续出现曙光。 美国之音报道，负责推动该校保留粤语课程的民间组织SaveCantonese.org表示，在美国推动普及广东话，从来不是粤普之争， 也与美中关系无关；而是要彰显美国多元文化精神，尊重广东话在美国200多年历史中佔有重要平等一席。 去年财困为由拟停课程 史丹福大学于去年1月初突然宣布因财政困难，打算停止与校内唯一的广东话课程教授张锡莉博士续约，事件引起部分师生不满。当地关注保育粤语人士自此自发成立SaveCantonese.org，向校方施压，期望校方保留课程，延续广东话在史丹福大学，以至在加州和美国的传统。 商人孙振豪为此向该校捐100万美元，他在新闻稿中称，广东话有魅力、包容性强，可以市井、形象，也可以好潮好酷…	2022-02-21	明报	中国新闻		521
【新冠疫情】钟南山粤语拍片谈抗疫：不容大量长者染疫死 争取动态清零（有片） 09:54	https://china.hket.com/article/3184977	本港疫情持续发酵，内地检疫团队南下援助。中国工程院院士钟南山以广东话拍片称，“Omicron的传播率远远大于流感”；与西方理念不同，“在人与病毒的斗争中，最高人权是生命”。他还说，不会容忍自然感染导致大量的长者死亡，“现在的政策是争取动态清零”。 钟南山：老年人疫苗接种不理想 须打第三针 钟南山在影片中讲述了18年前多次到香港与特区政府医学专家共同抗击沙士（SARS）的经历。他说，在人与病毒的斗争中，最高的人权就是人的生命，是健康的生命。 钟南山介绍，与其他病毒株比较，Omicron患病征状较轻，死亡率较低，所以市民不用过于担忧。但其危害性远远大于流感，一是传染性强，二是60岁以上的人群，死亡率会明显增加。钟南山对香港提出三方面的建议，一是预防传播，二是加强疫苗注射，三是储备药物治疗。 在疫苗方面，他称，目前在香港60岁以上的老年人疫苗接种率还不够理想。据他所知，香港市民至少接种一针的接…	2022-02-22	经济日报	即时社会热点		807
钟南山粤语喊话挺香港 港人点赞留言：感谢祖国感谢钟院士 14:25	http://www.hkcd.com/hkcdweb/content/2022/02/22/content_1326154.html	共和国勋章获得者、中国工程院院士、著名呼吸病学专家钟南山近日专门录制视频向香港市民加油打气。针对香港疫情，钟南山强调，“我们不会容忍自然感染导致大量的长者死亡，所以我们的政策仍然是争取动态清零。”钟南山详细介绍了奥密克戎的特点，并给出三个防疫建议，强调大家要加强团结协作，加上在中央政府的支援下共克时艰，必定能取得香港第五轮抗疫的胜利。 视频在本报社交平台发布后，香港市民纷纷留言表示，感谢祖国，感谢钟南山院士。“感谢中央来港帮助”“感谢钟院士”“希望中国香港人能团结一致对抗病毒”“感谢钟南山院士及抗疫医疗团队救助香港市民，衷心感激”“生命无价，抗疫至上”。 相信只要团结同心，保持信心，多方齐动，定可早日战胜疫情。 相关链接 有片｜钟南山谈香港疫情 吁做好预防传播尽快接种疫苗	2022-02-22	香港商报	即时新闻		370
疫情消息｜内地援港医护经深圳湾抵港谙英粤语曾参与多地疫情防控18:51	https://hd.stheadline.com/news/realtime/hk/2318684/即時-港聞-疫情消息-內地援港醫護經深圳灣抵港-諳英粵語曾參與多地疫情防控	新华社表示，中央正式委派内地医疗团队分批来港支援治疗新冠病人工作，由广东省组派的内地援港医疗队共75人於下午时分，经深圳湾口岸启程赴香港，全力配合特区政府开展病人救治工作，帮助香港尽快稳控疫情。 内地援港医疗队包括36名医生和39名护士，队员分别来自广州、深圳、佛山及珠海4市的14家三甲公立医院，从事呼吸内科、肾内科、心血管内科等与老年患者救治密切相关的科室，其中还包括6名感控专家以及4名中医师。 内地支援香港抗疫工作专班检测与医疗组组长、国家卫生健康委医政医管局副局长李大川亦到现场为援港医疗队送行。他表示，此次医疗队将前往香港亚博馆社区治疗设施参与医疗护理工作。亚博馆社区治疗设施收治的患者以老年人为主，且多数合并有基础疾病，是重症和危重症的高危人员，医疗队到港後将迅速开展工作，努力减少重症和病亡，之後会继续派出医疗队支援。 中山大学孙逸仙纪念医院医务科科长、主任医师余涛担任本次医疗队的…	2022-03-14	头条日报	即时港闻		688
粤语英语熟练 掌握香港社情	https://www.wenweipo.com/a/202203/15/AP622fa7c7e4b036dce99e8d4b.html?s2=要聞	香港文汇报讯（记者 卢静怡、帅诚、黄宝仪 广州报道）今次来港的医疗队成员均为抗疫经验丰富的医疗救治专家及一线抗疫骨干，大都熟练掌握粤语和英语，熟悉香港社会情况，出发前接受过专门培训，他们之中有不少人曾支援湖北抗疫并参与过广州当地新冠肺炎疫情救治及大规模核酸检测，与奥密克戎毒株多次“正面交手”。多名队员接受香港文汇报访问时都表示，将全力以赴投入工作，尽己所能帮助香港尽快稳控疫情，努力减少重症和病亡，也希望传达给香港同胞齐心协力抗击疫情的信心。 昨日中午，香港文汇报记者分几路赶赴广州市几家参与援港任务的医院，记录下援港医护人员临行出征的身影。 中山大学孙逸仙纪念医院医务科科长余涛主任医师担任本次医疗队的领队。长期从事急诊科和医务科相关工作的余涛表示，将运用自身在疫情防控工作中积累的经验，以高度责任感完成本次援港任务。 广州中医药大学第一附属医院派出了6名医护人员援港抗疫。该院呼吸与危重症医学…	2022-03-15	文汇报	要闻		1421
身经百战/来自三甲医院 粤语英语熟练	http://117.122.212.150/a.php?f=20220317/mw-3.txt	图：林郑月娥与特区政府人员及中联办人员，与内地援港医疗队合照。 昨日由广东省组派的内地援港医疗队300人，经莲塘口岸启程赴港，全力配合特区政府开展病人救治工作。据悉，这是香港第五波疫情发生以来，内地派出医疗队规模最大的一次。 据了解，这300名队员来自广州、佛山22家公立三甲医院，包括46名医生、246名护士、六名放射影像技师和两名行政管理人员。医疗队员们来自感染、呼吸、心血管、重症、中医等领域，都是各医院临床一线骨干，大多参加过广东、湖北等多地疫情救治工作，抗疫经验丰富，大都熟练掌握粤语和英语。 其中，医疗队的领队由广州中医药大学副校长、广东省中医院副院长张忠德担任。他深耕呼吸急危重症、新发突发传染病救治工作33年，在抗击新冠肺炎疫情中11次赴抗疫第一线开展临床救治工作。 治疗老年患者经验丰富 除了张忠德，这次来港队员大多参与过多地疫情防控工作。广东省第二人民医院呼吸与危重症医学科副主…	2022-03-17	大公报	要闻		794
有片｜香港4岁萌娃粤语报地铁站名走红：希望回上海与外婆团聚 19:06	http://www.hkcd.com/hkcdweb/content/2022/03/18/content_1331992.html	近日，来自香港的一名4岁小朋友黄隽希唱粤语歌报地铁站名的视频走红网络。因为妈妈是上海人，黄隽希练成一口标准的普通话唱儿歌、背古诗。黄隽希的爸爸说，小朋友几乎24小时都在唱歌，在社交平台上获得这么多网友的点讃后，黄隽希也比之前更有自信和动力表演。最后，黄隽希和爸爸合唱《狮子山下》为抗疫加油，希望能早日回到上海与外婆团聚。	2022-03-18	香港商报	即时新闻		170
大湾区GBA专题：2019年调查：广东2/3人用粤语 全球使用者1.2亿	https://news.mingpao.com/pns/%e6%b8%af%e8%81%9e/article/20220328/s00002/1648404206979/%e5%a4%a7%e7%81%a3%e5%8d%80gba%e5%b0%88%e9%a1%8c-2019%e5%b9%b4%e8%aa%bf%e6%9f%a5-%e5%bb%a3%e6%9d%b12-3%e4%ba%ba%e7%94%a8%e7%b2%b5%e8%aa%9e-%e5%85%a8%e7%90%83%e4%bd%bf%e	【明报专讯】粤语又称广东话、广府话，俗称白话，是一种汉藏语系汉语族的声调语言。粤语是汉语七大方言之一，也是汉族广府民系的母语。“粤语”之名源于中国古代岭南地区的“南越”。“越”是一个泛称，古代“越”、“粤”通假。相对于中原的“华夏”，先秦古籍中长江中下游以南地区的部族常统称为“越”，文献上称之为百越、百粤、诸越，包括“吴越”（苏南浙北一带）、“闽越”（福建一带）、“扬越”（长江中下游、江淮之间）等，现在邻国“越南”之名也是源于位处百越的南部。隋唐以后“越”、“粤”二字开始有所区别，前者多用于江浙吴语地区，后者多用于岭南两广（广东与广西），长期作为岭南地区的统称。粤语有九声六调，由中原雅言和岭南古越语融合发展而成，是保留古汉语成分较多的一种方言。 2016年港府统计：会说粤语人口比例微降 2019年《关于粤语传承与保护现状的调查报告》指出，当时广东省约1亿人口中，约有6700万人使用粤语；…	2022-03-28	明报	港闻		645
大湾区GBA专题：普教下穗青少讲母语 推“人文湾区”广东话响全国 音乐人林健华：今年推粤语歌良机	https://news.mingpao.com/pns/%e6%b8%af%e8%81%9e/article/20220328/s00002/1648404205056/%e5%a4%a7%e7%81%a3%e5%8d%80gba%e5%b0%88%e9%a1%8c-%e6%99%ae%e6%95%99%e4%b8%8b%e7%a9%97%e9%9d%92%e5%b0%91%e8%ac%9b%e6%af%8d%e8%aa%9e-%e6%8e%a8%e3%80%8c%e4%ba%ba%e6%96%87%	【明报专讯】“爸爸，我想要那个玩具……”、“你讲广东话先啦”。某晚在广州老城区越秀区，一对散步的父子对话。“我、想……要……嗰个”，“啱喇，你识讲?嘛”。这可能是2001年广州学校全面普通话教学后，不少家庭遇到的长辈讲粤语、后辈用普通话现象。去年国务院一份文件，亦首次将以粤语为主的香港纳入全国普通话普及率政策范围，要求提高港澳地区普通话应用水平。不过近一年来，内地先后有《大湾区哥哥》爆红、央视春晚拿粤语说相声，所湧现的粤语热，为粤语传承带来新的生机。北上多年的香港音乐人林健华亦认为，今年是推广粤语歌的最好时机。 明报记者 刘晓宇 去年底，广州大学广州发展研究院、广东省区域发展蓝皮书研究会发布《中国广州文化发展报告（2021）》蓝皮书指出，随着普通话教学推行20年，作为粤语文化发源地的广州，年轻一辈不讲粤语已成普遍现象，再过10年，引领广州发展的精英有可能不擅粤语，建议推广普通话之馀要加强…	2022-03-28	明报	港闻		3020
领奖粤语致谢 感激港人支持 英诗摘冠港生吁多读港诗	https://news.mingpao.com/pns/%e6%95%99%e8%82%b2/article/20220407/s00011/1649267470902/%e9%a0%98%e7%8d%8e%e7%b2%b5%e8%aa%9e%e8%87%b4%e8%ac%9d-%e6%84%9f%e6%bf%80%e6%b8%af%e4%ba%ba%e6%94%af%e6%8c%81-%e8%8b%b1%e8%a9%a9%e6%91%98%e5%86%a0%e6%b8%af%e7%94%9f%e7%	【明报专讯】由港人学习英文发音的经验，引伸至这城正经历的移民潮，英国剑桥大学经济学19岁香港学生叶晋玮凭英诗作品《擦音》（Fricatives），日前摘下英国国家诗词比赛（National Poetry Competition）冠军，成为历来最年轻得主。他于英国时间周二（5日）晚上出席颁奖活动，以广东话发表感言，谈及香港常被称作“文化沙漠”，认为说法不公平，鼓励港人多看本土诗人作品。 对港被指“文化沙漠”感不公 主办英国国家诗词比赛的The Poetry Society周二以网上直播形式举行颁奖活动。叶晋玮对获奖感荣幸，又称知道不少港人在香港时间昨天（6日）凌晨约3时收看直播，所以特意以广东话发表感言，感激港人支持和听他读诗。叶又说，不少人常说香港是“文化沙漠”，但他认为此说对香港创作者“有少少不公平”，又指香港有很多出色诗人、作家、艺术家，“我鼓励大家，如对这首诗有一种回响的话，不妨看…	2022-04-07	明报	教育		808
有片丨讲粤语的巴基斯坦义工帮香港抗疫：我也是香港人 一起加油 17:37	http://www.hkcd.com/hkcdweb/content/2022/04/07/content_1336160.html	香港社会很多元，有不少外籍人士居住在此。他们也爱香港这座城市，有些人还能说流利的粤语，并希望与香港本地人一起共克时艰、共抗疫情。一名叫雅文娜的巴基斯坦女孩在香港生活，疫情之下，她加入了义工团队，挨家挨户分发物资给社区的人，希望为香港抗击疫情贡献自己的一份力量。雅文娜与父母在香港生活了20年，能说一口流利的中文。她已经将自己视为香港人。 雅文娜说“我真的很喜欢香港，不仅是这座城市，还有这里的人，因为我觉得我周围的人真的很爱我，很支持和帮助我。有很多人需要我们的帮助，所以我们要支持他们，爱护他们，我们大家都一起合作、加油、 努力。”（视频编辑：谢烨挺）	2022-04-07	香港商报	即时新闻		292
湾区手记：小酒馆里的“粤语角”	https://news.mingpao.com/pns/%e6%b8%af%e8%81%9e/article/20220429/s00002/1651169509577/%e7%81%a3%e5%8d%80%e6%89%8b%e8%a8%98-%e5%b0%8f%e9%85%92%e9%a4%a8%e8%a3%8f%e7%9a%84%e3%80%8c%e7%b2%b5%e8%aa%9e%e8%a7%92%e3%80%8d-%e6%96%87-%e5%b0%9a%e6%9d%b1%e7%be%8e	【明报专讯】泉州这座福建古城距离广州约800公里，方言为闽南话。在当地旅游时，走进一间小酒吧，碰巧听到老板正和朋友用广东话交谈。 本以为是广东人到这里做生意，没想到25岁的老板孙泽铭是土生土长的泉州本地人，朋友也一样。他们的发音算是相当地道，若不仔细分辨，在场顾客均以为二人来自广东，店内亦正播放粤语歌曲。 当我称讚老板的粤语，他略带得意地说“我觉得自己是有语言天赋的”。一旦有外人加入对话，他们立即切换闽南话或普通话应答。“这个（讲粤语）是我和朋友私下的习惯，我们平时用粤语交流，纯粹出于喜好。”孙泽铭儿时曾随父母到广东短暂生活，学生假期亦曾到香港亲戚家居住，对香港和粤语文化十分熟悉。 上个月在粤语专题采访之馀，亦碰到一些人和事，令人更真切体会到粤语绝不止影响粤方言区生活的人，在粤语流行文化发展、人口迁移的过程中，早已扩散到更远的地域——泉州小酒馆的“粤语角”就是其一。 文：尚东美	2022-04-29	明报	港闻	尚东美	416
竹门日语/粤语流行曲盛宴	http://117.122.212.150/a.php?f=20220502/xk-4.txt	演唱香港粤语流行曲为主的大型音乐节目《声生不息》开播，坊间对粤语歌的关注度瞬间提升。不管观众对节目评价如何，都不禁让人想起各自曾琅琅上口、反覆播放或魂牵梦萦的粤语金曲。 香港是粤语流行曲的摇篮，小小的城市，孕育了无数流行乐“天王巨星”、创作能手、幕後精英，也制作过许多优质专辑，作品影响无远弗届。凭着数十年唱片、电视、电影、广告及传播行业台前幕後的共同努力，加上既可吸收欧美、日韩、泰、台等国家和地区的流行精髓，又可将流行乐产品及文化输出至内地、东南亚和世界各地华人圈子的地理优势，成就了足以为傲的“港乐盛宴”，为粤语歌建立了雄厚的发展基础。随着全球一体化与网络时代的来临，许多人觉得香港乐坛已不复当年精彩，广东歌在中文流行音乐市场占有率也不及普通话歌，流行文化产业的表现与影响力更岌岌可危。时代变化无疑是全球各领域面对的相同挑战，汰旧换新、竞争不断；然而有竞争才会有进步，正如上世纪为美苏垄断的太…	2022-05-02	大公报	小公园	简嘉明	727
跨代歌手旧曲新唱 造就新流行 情怀未变 粤语歌“声生不息”	https://www.wenweipo.com/a/202205/09/AP627828d0e4b036dce9acb64d.html	随着湖南卫视与无綫电视联手打造的音乐综艺《声生不息》近日在芒果TV和翡翠台迎来首播，粤语歌再次以“主角”身份走入内地观众视野。同台竞技、旧曲新唱演绎经典的16组歌手，有乐坛前辈林子祥、叶蒨文伉俪，又有内地实力派唱将周笔畅、毛不易，更有新生代香港歌手炎明熹、曾比特……吸引了出生於不同年代的观众，唤起他们各自对粤语歌的情感与记忆。或有人说，粤语歌现在已并非潮流，甚至处於乐坛边缘地带，但其实它经久未衰，背後的情结与情怀，也从未泯灭。◆香港文汇报记者 黄依江 过去一年，内地各类综艺节目中出现越来越多香港歌手、艺人身影，粤语歌曲也慢慢被唱响。粤语歌在内地重回大众视野，远不止於《声生不息》这档制作精良的节目，我们可以看到，一些年代久远的粤语歌也触达年轻一代听众，在当下流行文化中因不同原因和方式重焕独特光彩。 赋予旋律流行意义 “一吻便颠倒众生，一吻便救一个人”，收录於杨千嬅2004专辑《电光幻影》中…	2022-05-09	文汇报	副刊		1296
ways of seeing：大堂剧照 定格上世纪光影 越洋粤语片 解华人乡愁	https://news.mingpao.com/pns/%e5%89%af%e5%88%8a/article/20220515/s00005/1652551146486/ways-of-seeing-%e5%a4%a7%e5%a0%82%e5%8a%87%e7%85%a7-%e5%ae%9a%e6%a0%bc%e4%b8%8a%e4%b8%96%e7%b4%80%e5%85%89%e5%bd%b1-%e8%b6%8a%e6%b4%8b%e7%b2%b5%e8%aa%9e%e7%89%87-%e8%a7	【明报专讯】纪录片导演杨紫烨编辑的《昨日的影 今日的光──粤语片剧照风华半世纪》，围绕曾坐落美国三藩市华埠的世界戏院。这家於1949年开业的戏院，在五六十年代上映过许多叫好叫座的粤语片，把它们发行到美洲各地，并保存了珍贵拷贝。戏院於1995年结业，留下约3000帧大堂剧照，杨紫烨从中选出400多帧，侧记陪伴几代华人的光影，如何慰藉乡愁。“大堆头”剧照 人人有粮出 此书的责任编辑郑传鍏指五六十年代的大堂剧照可分两种，一种带出人物冲突或关系，突显片中有哪些明星和大场面，如《雷雨》剧照的前景有李小龙和李清二人，身後宅邸就隐现张瑛的侧影。《射雕英雄传》剧照中，饰演郭靖的曹达华一口咬住大蝮蛇，用这经典情节吸引书迷进场。在未有电视和网络的年代，这些剧照就似定格的预告片。另一种则走热闹的“大堆头”路线，如《家春秋》系列中《家》的剧照，有近20名演员簇拥着病榻上由卢敦饰演的高老太爷。有份参演《家春秋》系…	2022-05-15	明报	星期日WorkShop		3582
【特稿】新来港人士：粤语欠佳求职难	https://www.wenweipo.com/a/202205/20/AP6286ac19e4b036dce9aeca80.html	“由於新冠疫情关系，我已有几个月无工开，有时要向朋友借钱交租。”新来港的徐女士与丈夫离婚後租住床位，其床位月租2,000元，试过穷得连租金也未能缴交，要向朋友借钱度日。她以往靠上门为客户打扫清洁维生，新冠疫情下却失去此收入来源，“我本身都是靠朋友介绍上门做清洁，但没有办法，疫情严重，人家也不敢再请人上门清洁。” 她表示，一直有四处搵工，惟本身广东话欠佳而影响求职，“我自己听广东话没有问题，但讲就不是很好，人家听不明白，沟通有困难，求职亦受影响。”她直言自己有气有力不想申领综援，“希望能够找到工作，不想要政府援助。”不过，碍於语言障碍，她仍未敢到劳工处登记求职，怕广东话不灵光没有适合工作配对。 疫下跨境航运停 领班失业做炒散 从事跨境航运20多年的陈先生，原本在船公司当客舱服务领班，月入逾3万元，惟2020年香港出现疫情，港澳客运服务停航，他最终被迫离开原职，“2020年停航後至2021年…	2022-05-20	文汇报	香港		849
珍宝海鲜舫｜寻味粤语长片 沙田画舫雍雅山房成回忆 13:30	https://std.stheadline.com/realtime/article/1842548/%E5%8D%B3%E6%99%82-%E6%B8%AF%E8%81%9E-%E7%8F%8D%E5%AF%B6%E6%B5%B7%E9%AE%AE%E8%88%AB-%E5%B0%8B%E5%91%B3%E7%B2%B5%E8%AA%9E%E9%95%B7%E7%89%87-%E6%B2%99%E7%94%B0%E7%95%AB%E8%88%AB%E9%9B%8D%E9%9B%85%E5%B1%B1	香港仔“珍宝海鲜舫”将被移离本港，加上厨房船入水倾侧，相中一片颓垣，失了色的“珍宝海鲜舫”看得几代港人心碎。 由盛而衰唏嘘岂止是“珍宝”，“沙田画舫”和“雍雅山房”都是上一代港人失落了的集体回忆。老饕如今要吃到有粤语长片味道的老字号，沙田的“龙华酒店”和屯门的“容龙海鲜酒家”还是不错的选择。 厨房船入水倾侧。资料图片 “沙田画舫”变“水中天” “沙田画舫”与“珍宝海鲜舫”一样以海鲜闻名，自1963年起停泊於沙田海近沙田墟一带。但随着港府於1970年发展沙田成为新市镇而需填沙田海，多番遭逼迁的“沙田画舫”最终於1984年结业。资料显示，负责人一度考虑将画舫迁往广州继续营业，但最终在中山河面营业一段时间後，因欠保养而沉没。 敦煌酒楼集团於1986年在城门河畔兴建“敦煌画舫”，以“石舫”代替“沙田画舫”，由於“敦煌画舫”并非真船，渐渐被视作普通酒楼，到敦煌酒楼集团於2002年结业後，“石舫”改…	2022-06-02	星岛日报	即时港闻		1329
iOS 16新功能 支援粤语拼音	https://orientaldaily.on.cc/content/兩岸國際/odn-20220608-0608_00180_081/iOS-16新功能--支援粵語拼音?sort2=國際	加强多项用户间互动 可收回分享资讯保私隐 苹果公司今年的全球开发者大会（WWDC）在香港时间昨日凌晨举行，公布iOS 16等新一代作业系统以及新款Apple Watch的watchOS 9等产品。 锁屏外观重新设计 iOS 16改进的地方多不胜数，包括锁定屏幕外观经重新设计，加入了照片景深效果，也向用户提供有更多个性化的设定，用户可选择和调整不同的色彩、字体和背景设计，并加入了Widget小工具，也将提供数百种预设模式供用户选择及切换。通知中心也作出了改动，用户可将之隐藏起来，新通知也会变成从底部出现，锁定画面的Widget也可即时显示新资讯，例如球赛比数、Uber司机的现在位置等。改了新版的专注模式可以与新的锁定画面配搭，也可以针对特定的App进行设定；讯息App及iMessage在改版後可以修改已传送出去的讯息、收回，以及收回“已读”；“听写”功能也升级，流畅度提升之外，也可以在语音…	2022-06-08	东方日报	国际		864
孙东普通话发言 将多讲粤语	http://www1.hkej.com/dailynews/politics/article/3164941/	立法会议员孙东将出任创新科技及工业局局长，昨日更成首位以普通话发言的主要官员。他会见记者期间，被问到会否考虑学好广东话，孙东以广东话回应称，“你可以跟我讲广东话，我识听”，并说日后落区会多用广东话。 1994年来港的孙东，在城市大学任教多年，去年成为立法会新丁。昨日他在记者会上，先以普通话发言，指无论是当年“学生港漂”、“海归”，还是今天的院士学者、议员，自己的人生已与香港命运紧密结合在一起。 有记者问他日后会否学好广东话，孙东尝试以“半咸淡”广东话回应，强调自己沟通“绝对无问题”，以后会多说广东话，特别是落区宣传科技政策。 杨润雄未去过M+ 现任教育局局长杨润雄将平调至新设的文化体育及旅游局出任局长。被问有否到过去年开幕的M+，他回应说“暂时我未有机会去，因为见到社会上都好多人去，预畀佢哋去先”。亦有记者问他有否留意香港足球代表队打入亚洲杯决赛，杨润雄就表示，港队经过多年再有机会晋身决…	2022-06-20	信报	政坛脉搏		463
粤语金曲夜 分享莞港合作精彩历程	http://117.122.212.150/a.php?f=20220625/zm-24.txt	图：9名1997年出生的青年合唱歌曲《我和我的祖国》。\受访者供图 【大公报讯】记者卢静怡东莞报道：23日晚上，东莞举行“潮流东莞．火柴盒”城市艺术Time经典粤语金曲之夜，透过一首首经典港乐，分享莞港两地合作的精彩历程。活动也线上直播，吸引超30万人次在线观看，欣赏经典港乐，展现同饮一江水的莞港情。 随着歌曲《铁血丹心》响起，粤语金曲之夜拉开帷幕。本场音乐会设置4个年代板块，分别是70、80年代的“流金岁月”；90年代的“东方之珠”；00、10年代的“香江春潮涌”、新时代的“一起向未来”，通过30首歌，带观众穿越回到香港群星璀璨的光辉岁月。一首《光辉岁月》拉开90年代粤语金曲的序幕。而00年代的粤语金曲《明年今日》等也让在场年轻人齐声合唱，追溯青春。 活动现场邀请了9名1997年出生的青年朋友一起演唱歌曲《我和我的祖国》，表达了东莞青年对香港、祖国的诚挚祝福。活动现场还邀请港商代表与现…	2022-06-25	大公报	中国		520
有片 | 萌娃实力演绎粤语版唐诗 13:47	http://www.hkcd.com/hkcdweb/content/2022/06/25/content_1351630.html	“欲穷千里目，更上一层楼”、“停车坐爱枫林晚，霜叶红于二月花”，快来看萌娃实力演绎粤语版唐诗。（视频来源：央视新闻）	2022-06-25	香港商报	即时新闻		68
彭丽媛访戏曲中心 粤语问好赠古本集	http://www1.hkej.com//dailynews/headline/article/3176031/	国家主席夫人彭丽媛昨天下午抵港后，到访西九文化区戏曲中心，她以广东话“你好”向在场人士打招呼，期间与年轻演员、乐团成员等交流，并向戏曲中心致送传统戏曲作品结集《古本戏曲丛刊》。 政府未有安排传媒采访彭丽媛的行程，新闻处事后发稿交代活动情况，指彭丽媛在戏曲中心听取西九管理局表演艺术行政总监谭兆民介绍西九文化区规划、最新发展，以及戏曲中心传承推广粤剧、传统中国戏曲的工作。她之后到茶馆剧场欣赏“茶馆新星剧团”彩排粤剧折子戏，赞扬演员非常专业，“台上一分钟，台下十年功。”彭丽媛亦观看“香港天籁敦煌乐团”的彩排和参观“尤声普粤剧艺术展：文武庄谐八十秋”展览。 中联办副主任卢新宁陪同 彭丽媛与4名曾参加“内地专题实习计划”、到故宫博物院实习的青年义工交流，其后向戏曲中心致送《古本戏曲丛刊》，丛刊由已故著名文学史家郑振铎发起，编纂工作历经数十载完成。陪同彭丽媛的人员包括中联办副主任卢新宁和民政事务局副…	2022-07-01	信报	要闻		430
非本地医生不谙粤语 弹性处理	https://paper.hket.com/article/3300801	不少市民均担心，公立医院聘请非本地培训医生会带来沟通问题，医管局总行政经理（医疗职系）邓锦成坦言，目前医管局求才若渴，会弹性聘请不谙粤语医生，例如其中一名来自南非的脑外科医生，经有限度注册到玛嘉烈医院工作，由于其只懂英语，与病人沟通上或需护士协助翻译。 与病人沟通 护士助翻译 邓锦成又认为，本港医生都曾在外受训，与海外医生磨合上不成问题。 邓表示，过去医管局只会聘请能说流利粤语的医生，除较少接触病人的专科，如病理科、麻醉科、放射诊断科等，不过他坦言，目前医管局求才若渴，故会弹性处理及调节，举例指其中一名来自南非的脑外科医生，经有限度注册到玛嘉烈医院工作，其只懂英语，“如要解释俾病人听，可能要个文员或者护士帮帮手”。不过邓强调，该名医生的部门主管仍十分感激他带来的新思维。 被问到本地医生与海外医生如何融合，邓锦成认为不成问题，因公院内绝大部分医生都曾到外国受训，与外地医生工作手法相近，“在…	2022-07-13	经济日报	要闻		521
融入大湾区 发展粤语文化电影	http://ebook.hkcd.com/PC/content/202207/31/content_1231808.html?sort2=財經副刊·專題	黄百鸣相信粤语文化电影会受大湾区观众欢迎。 展望香港电影未来的发展，黄百鸣称：“香港电影有自己的个性，粤语文化是香港的特色。虽然合拍电影出现之後，为了适应内地文化而在题材上作出改变，但我很幸运，功夫电影和反贪电影，都是以本地风格来写剧本，却同样受到内地观众喜爱。九十年代的《家有囍事》於内地上映，在南方尚算受欢迎，惟北方观众却难以接受，因看不懂笑点。文化差异使很多粤语片在内地未能取得好成绩。”黄百鸣表示随着大湾区的成立，转机亦出现，大湾区有8000多万人口，他们以粤语为基础，市场较香港大10倍，他建议香港继续创作擅长的粤语文化电影，在大湾区应可取得不错的成绩。 黄百鸣解释：“虽然内地北方制作电影较南方出色，但广东省才是全国电影的粮仓，全国票房排名第一，所以可考虑与大湾区不同的城市合作开拍粤语文化电影。香港电影可以走两条路，大型制作选择合拍方式，至於以大湾区为目标市场的，则可拍粤语文化片种，…	2022-07-31	香港商报	财经副刊·专题		577
有片丨演绎粤语金曲是怀旧亦是传承 专访深圳印象经典乐队 10:21	http://www.hkcd.com/hkcdweb/content/2022/08/14/content_1359005.html	80年代开始，由谭咏麟、张国荣、陈百强以及梅艳芳为代表的“三王一後”推动了香港流行乐坛进入全盛而辉煌的时期。香港流行音乐，同香港电影一样，是香港文化中独特的一道风景，也是60後、70後、80後甚至90後成长过程中某种意义上的必修课。 日前，以演奏粤语金曲为主的深圳印象经典乐队中的成员——键盘手林宝坤（大林哥），接受了香港商报记者的采访，聊起了昔日香港流行音乐的辉煌荣光和乐队成员历经三十余载重聚再组的故事。 经典印象键盘手林宝坤接受本报记者采访 作为第一批乐队音乐人 见证香港流行音乐的变迁 用手机在抖音、微信视频号等平台都能搜到“印象经典乐队”的账号，账号简介写着：音乐人，深圳本土乐队，几乎每一首经典粤语金曲的和旋都在脑海中，成员有键盘手大林哥，吉他手超哥，主唱小罗文和广电杰哥..... 主唱之一小罗文（左） 主唱之一杰哥（左） “玩乐队几十年，可以说所有的经典粤语金曲和旋都印在脑中，不用…	2022-08-14	香港商报	即时视听		2674
深圳乐手接受本报专访话当年 见证港乐变迁重温粤语金曲		【香港商报讯】记者陈彦洁、乔凯实习生林梓琦报道：香港流行音乐和香港电影一样，是香港文化中独特的一道风景，也是60 后、70 后、80 后甚至90 后成长过程中某种意义上的必修课。日前，以演绎粤语金曲为主的深圳印象经典乐队中成员——键盘手林宝坤（大林哥）接受了本报记者专访，聊起了昔日香港流行音乐的辉煌荣光和乐队成员历经三十余载重聚再组的故事。 重组乐队演绎粤语金曲 “玩乐队几十年，可以说所有的经典粤语金曲和弦都印在脑中，不用看乐谱都能弹出来。”聊起乐队、聊起音乐，键盘手林宝坤自信满满。 大概在1984 年，林宝坤开始接触乐队，是早期内地玩乐队的第一批人，主要翻唱和演绎香港流行歌曲。林宝坤的乐队生涯亦见证了香港流行音乐的变迁。早年，乐队成员跟不少香港歌手、乐队同台演出过。 记者细问乐队的“前世今生”，林宝坤娓娓道来：“一个乐队基本的『四大件』就是键盘手、主音吉他手、贝斯手和鼓手，早期我做过主…	2022-08-15	香港商报	直通南粤		1311
传禁员工上班期间讲粤语 广州寿司郎：无禁止员工以粤语与客人沟通 09:35	https://finance.mingpao.com/fin/instantf/20220818/1660787186423/%e5%82%b3%e7%a6%81%e5%93%a1%e5%b7%a5%e4%b8%8a%e7%8f%ad%e6%9c%9f%e9%96%93%e8%ac%9b%e7%b2%b5%e8%aa%9e-%e5%bb%a3%e5%b7%9e%e5%a3%bd%e5%8f%b8%e9%83%8e-%e7%84%a1%e7%a6%81%e6%ad%a2%e5%93%a1%e5%b7%a	内地网上流传一张截图显示，寿司郎广州一间门店禁止员工上班期间说粤语，违反者会被严格处理。 广州寿司郎发布声明指，注意到一张内部员工群的聊天截图引发了公众关注和讨论，收到网民回应后，公司内部高度重视，并在第一时间对事件进行核实，目前已对相关人员进行了严肃教育，对因内部信息传递表述不当引发的争议和不适，向公众致歉。 广州寿司郎表示，公司从未禁止员工以粤语与客人沟通，鼓励员工基于自身条件，根据客人语言习惯，进行自由舒适的沟通。但在内部交流中，由于公司员工来自不同的地区，为了工作沟通更顺畅，建议员工之间以普通话作为首要语言。	2022-08-18	明报	即时财经		277
广州寿司郎澄清禁员工上班讲粤语不实 12:17	https://std.stheadline.com/realtime/article/1865151/%E5%8D%B3%E6%99%82-%E6%B8%AF%E8%81%9E-%E5%BB%A3%E5%B7%9E%E5%A3%BD%E5%8F%B8%E9%83%8E%E6%BE%84%E6%B8%85%E7%A6%81%E5%93%A1%E5%B7%A5%E4%B8%8A%E7%8F%AD%E8%AC%9B%E7%B2%B5%E8%AA%9E%E4%B8%8D%E5%AF%A6	内地网上流传一张截图显示，寿司郎广州一间门店禁止员工上班期间说粤语，违反者会被严格处理。 广州寿司郎发布声明指，注意到一张内部员工群的聊天截图引发了公众关注和讨论，收到网民回应後，公司内部高度重视，并在第一时间对事件进行核实，目前已对相关人员进行了严肃教育，对因内部信息传递表述不当引发的争议和不适，向公众致歉。 广州寿司郎表示，公司从未禁止员工以粤语与客人沟通，鼓励员工基於自身条件，根据客人语言习惯，进行自由舒适的沟通。但在内部交流中，由於公司员工来自不同的地区，为了工作沟通更顺畅，建议员工之间以普通话作为首要语言。	2022-08-18	星岛日报	即时金融		277
广州寿司郎澄清禁员工上班讲粤语不实12:17	https://hd.stheadline.com/news/realtime/fin/2365151/即時-金融-廣州壽司郎澄清禁員工上班講粵語不實	内地网上流传一张截图显示，寿司郎广州一间门店禁止员工上班期间说粤语，违反者会被严格处理。 广州寿司郎发布声明指，注意到一张内部员工群的聊天截图引发了公众关注和讨论，收到网民回应後，公司内部高度重视，并在第一时间对事件进行核实，目前已对相关人员进行了严肃教育，对因内部信息传递表述不当引发的争议和不适，向公众致歉。 广州寿司郎表示，公司从未禁止员工以粤语与客人沟通，鼓励员工基於自身条件，根据客人语言习惯，进行自由舒适的沟通。但在内部交流中，由於公司员工来自不同的地区，为了工作沟通更顺畅，建议员工之间以普通话作为首要语言。	2022-08-18	头条日报	即时金融		277
禁员工粤语沟通惹议 广州寿司郎致歉：内部传递表述不当 14:36	https://std.stheadline.com/realtime/article/1865202/%E5%8D%B3%E6%99%82-%E4%B8%AD%E5%9C%8B-%E7%A6%81%E5%93%A1%E5%B7%A5%E7%B2%B5%E8%AA%9E%E6%BA%9D%E9%80%9A%E6%83%B9%E8%AD%B0-%E5%BB%A3%E5%B7%9E%E5%A3%BD%E5%8F%B8%E9%83%8E%E8%87%B4%E6%AD%89-%E5%85%A7%E9%83%A8	近日一张广州寿司郎内部员工群聊天截图近日在网络上流出，引发网民的关注和讨论。该截图显示，一个微信名带有广州寿司郎吴姓人士标示了群里所有人，并称“发现上班再讲粤语的，举报到我这里，将严格处理”。 针对“禁止员工上班讲粤语”一事，广州寿司郎餐饮有限公司今日发布声明称，已对相关人员进行了严肃教育，对因内部信息传递表述不当引发的争议和不适，向大家报以诚挚的歉意。 寿司郎表示，公司从未禁止员工以粤语与客人沟通，鼓励员工基於自身条件，根据客人语言习惯，进行自由舒适的沟通。但在内部交流中，由於公司员工来自不同的地区，为了工作沟通更顺畅，建议员工之间以普通话作为首要语言。 寿司郎表示，公司从未禁止员工以粤语与客人沟通。网上图片 寿司郎表示，公司从未禁止员工以粤语与客人沟通。网上图片 寿司郎回应禁止员工上班说粤语为内部信息传递表述不当。网上图片 寿司郎回应禁止员工上班说粤语为内部信息传递表述不当。网上图片…	2022-08-18	星岛日报	即时中国		930
禁员工粤语沟通惹议广州寿司郎致歉：内部传递表述不当14:36	https://hd.stheadline.com/news/realtime/chi/2365202/即時-中國-禁員工粵語溝通惹議-廣州壽司郎致歉-內部傳遞表述不當	近日一张广州寿司郎内部员工群聊天截图近日在网络上流出，引发网民的关注和讨论。该截图显示，一个微信名带有广州寿司郎吴姓人士标示了群里所有人，并称“发现上班再讲粤语的，举报到我这里，将严格处理”。 针对“禁止员工上班讲粤语”一事，广州寿司郎餐饮有限公司今日发布声明称，已对相关人员进行了严肃教育，对因内部信息传递表述不当引发的争议和不适，向大家报以诚挚的歉意。 寿司郎表示，公司从未禁止员工以粤语与客人沟通，鼓励员工基於自身条件，根据客人语言习惯，进行自由舒适的沟通。但在内部交流中，由於公司员工来自不同的地区，为了工作沟通更顺畅，建议员工之间以普通话作为首要语言。 寿司郎表示，公司从未禁止员工以粤语与客人沟通。网上图片	2022-08-18	头条日报	即时中国		332
寿司郎广州店禁员工说粤语 公司称内部信息传递不当 广东网民扬言抵制	https://news.mingpao.com/pns/%e4%b8%ad%e5%9c%8b/article/20220819/s00013/1660846981270/%e5%a3%bd%e5%8f%b8%e9%83%8e%e5%bb%a3%e5%b7%9e%e5%ba%97%e7%a6%81%e5%93%a1%e5%b7%a5%e8%aa%aa%e7%b2%b5%e8%aa%9e-%e5%85%ac%e5%8f%b8%e7%a8%b1%e5%85%a7%e9%83%a8%e4%bf%a1%e6%8	【明报专讯】日本跨国连锁回转寿司专卖店寿司郎，其广州海珠城分店近日禁止员工上班期间说粤语，违者会被“严格处理”，事件引发广东网民不满并扬言抵制。网传聊天截图显示，该店店长在员工群组中称，“发现上班讲粤语的将严格处理”、“口头禅也不行”；员工亦证实在上班时间不能用粤语和同事交流。广州寿司郎餐饮有限公司前日（17日）发布致歉声明，称是因内部信息传递表述不当，已严肃教育相关人员。 同事交流禁粤语 招呼客人则可 网传聊天截图显示，寿司郎广州海珠城分店店长在工作群要求，称“发现上班讲粤语的，举报到我这里，将严格处理”，又指出“特别是讲粤语的几个人，再有类似情况发生，直接辞职回家”、“希望构建和谐的团队，禁止用粤语聊天以及说脏话（口头禅也不行）”等。广东广播电视台《DV现场》17日访问该店，有员工表示，在上班时间不能用粤语和同事交流，但可用粤语和顾客交流。针对寿司郎的相关规定，有内地律师认为，若员工…	2022-08-19	明报	中国新闻		943
禁员工说粤语捱轰 据报广州寿司郎吁停止网暴涉事店长 17:10	https://finance.mingpao.com/fin/instantf/20220819/1660900189946/%e7%a6%81%e5%93%a1%e5%b7%a5%e8%aa%aa%e7%b2%b5%e8%aa%9e%e6%8d%b1%e8%bd%9f-%e6%93%9a%e5%a0%b1%e5%bb%a3%e5%b7%9e%e5%a3%bd%e5%8f%b8%e9%83%8e%e7%b1%b2%e5%81%9c%e6%ad%a2%e7%b6%b2%e6%9a%b4%e6%b6%89	日本跨国连锁回转寿司专卖店寿司郎，其广州海珠城分店近日禁止员工上班期间说粤语，违者会被“严格处理”，事件引发广东网民不满并扬言抵制。内媒《澎湃新闻》引述辖区知情人士指，涉事店长在家休息，门店也更换了店长，希望停止对他进行网络暴力。 内地近日网上流传一张聊天截图显示，寿司郎广州海珠城分店店长在工作群要求，称“发现上班讲粤语的，举报到我这里，将严格处理”，强调“希望构建和谐的团队，禁止用粤语聊天以及说脏话（口头禅也不行）”等。 广州寿司郎餐饮有限公司前日（17日）已发布致歉声明，称是因内部信息传递表述不当，已严肃教育相关人员。该公司指，从未禁止员工以粤语与客人沟通，鼓励员工基于自身条件，根据客人语言习惯，进行自由舒适的沟通。但在内部交流中，由于公司员工来自不同的地区，为了工作沟通更顺畅，建议员工之间以普通话作为首要语言。 传禁员工上班期间讲粤语 广州寿司郎：无禁止员工以粤语与客人沟通	2022-08-19	明报	即时财经		418
粤语首登议事堂	https://stepaper.stheadline.com/article/221503133194065/%E8%A6%81%E8%81%9E%E6%B8%AF%E8%81%9E-%E7%B2%B5%E8%AA%9E%E9%A6%96%E7%99%BB%E8%AD%B0%E4%BA%8B%E5%A0%82	今天，当我们收看电视新闻，立法会议员大多在会议上使用粤语发言，但大家知道在一九七二年前，立法局所有会议都只能以英语进行吗？今年是立法机关准许议员使用中文发言五十周年，就和大家一起回顾个中的历史背景和发展。 立法局议员获准以粤语发言，究其原因，可追溯至一九六○年代末的“争取中文成为法定语文运动”。一九六○年代末，香港社会各界人士都认为港府应把中文定为法定语文，如一九六八年一月二十日，香港中文大学崇基学院学生会曾举办研讨会，与会的副布政司黎敦义、市政局议员胡鸿烈和黄梦花俱赞同将中文列为官方语文，并指出中文与英文地位应完全平等。 争取中文为官方语文 与英文平等 一九七○年十月二十一日，港府正式成立公事上使用中文问题研究委员会，由行政局非官守议员冯秉芬出任主席，检讨中文的地位。一九七一年二月二十八日，该委员会发表首份报告书，建议立法局、市政局及各政府委员会内准以粤语或英语发言，并采用双语即时传译…	2022-08-29	星岛日报	港闻		1361
“港式广东话”俚语字典惊现国际顶尖大学网站 粤语粗口英译爆趣 06:00	https://std.stheadline.com/realtime/article/1875885/%E5%8D%B3%E6%99%82-%E6%B8%AF%E8%81%9E-%E6%B8%AF%E5%BC%8F%E5%BB%A3%E6%9D%B1%E8%A9%B1-%E4%BF%9A%E8%AA%9E%E5%AD%97%E5%85%B8%E9%A9%9A%E7%8F%BE%E5%9C%8B%E9%9A%9B%E9%A0%82%E5%B0%96%E5%A4%A7%E5%AD%B8%E7%B6%B2%	加拿大名校滑铁卢大学的网站上载了一本“港式广东话俚语”英译字典，翻译了逾5千个港式字词如泵波钟、嗒糖等，其中最瞩目是英译大量粤语粗口，鬼马生动，迅即热爆网络。 【点击即睇｜《广东话俚语字典》生鬼英译港式俚语↓↓↓↓】 加拿大排名第一的滑铁卢大学网站上载了一本“港式广东话俚语”英译字典。(滑铁卢大学FB图片) 这本上载的字典名为“Dictionary of Cantonese Slang”(《广东话俚语字典》)，共353页，字典未有注明出版机构及编撰人，字典以表列方式提供广东话原词、发音与英文翻译及解意。 字典最瞩目是英译大量粤语粗口。（网上图片） 字典部分内容含错字，例如“点红点『录』”，正确应为“绿”而非“录”；“古『蛊』仔”，正确应为“惑”而非“蛊”。此外，部分字词的英文翻译亦有出错，如“揼石仔”，本意为一步步积少成多，英文翻译却指为“to play mahjong”(打麻雀)。 滑…	2022-09-29	星岛日报	即时港闻		922
“港式广东话”俚语字典惊现国际顶尖大学网站 粤语粗口英译爆趣 06:00	https://std.stheadline.com/realtime/article/1875885/%E5%8D%B3%E6%99%82-%E5%A8%9B%E6%A8%82-%E6%B8%AF%E5%BC%8F%E5%BB%A3%E6%9D%B1%E8%A9%B1-%E4%BF%9A%E8%AA%9E%E5%AD%97%E5%85%B8%E9%A9%9A%E7%8F%BE%E5%9C%8B%E9%9A%9B%E9%A0%82%E5%B0%96%E5%A4%A7%E5%AD%B8%E7%B6%B2%	加拿大名校滑铁卢大学的网站上载了一本“港式广东话俚语”英译字典，翻译了逾5千个港式字词如泵波钟、嗒糖等，其中最瞩目是英译大量粤语粗口，鬼马生动，迅即热爆网络。 【点击即睇｜《广东话俚语字典》生鬼英译港式俚语↓↓↓↓】 加拿大排名第一的滑铁卢大学网站上载了一本“港式广东话俚语”英译字典。(滑铁卢大学FB图片) 这本上载的字典名为“Dictionary of Cantonese Slang”(《广东话俚语字典》)，共353页，字典未有注明出版机构及编撰人，字典以表列方式提供广东话原词、发音与英文翻译及解意。 字典最瞩目是英译大量粤语粗口。（网上图片） 字典部分内容含错字，例如“点红点『录』”，正确应为“绿”而非“录”；“古『蛊』仔”，正确应为“惑”而非“蛊”。此外，部分字词的英文翻译亦有出错，如“揼石仔”，本意为一步步积少成多，英文翻译却指为“to play mahjong”(打麻雀)。 滑…	2022-09-29	星岛日报	即时港闻		922

## Sheet: 繁体字、正体字
title	url	content	date	from	in	by	words
神秘围棋手“Master”网上挑机 6日55胜赢遍中日韩台顶尖高手 以繁体字向对手说“谢谢” 19:01	http://news.mingpao.com/ins/instantnews/web_tc/article/20170104/s00005/1483527433694	纵使并非人人都懂得下围棋，但去年一场“人机大战”，吸引不少人留意，齐齐跟进究竟人工智能（AI）可否战胜人类。上一次旗开得胜的Alpha GO，自上次与韩国棋手李世石对奕后未有新动作，惟近日却突然出现疑似新的AI棋手，以“Master”为名，在不同的对奕网站连续战胜多名中、日、韩、台好手，其中中国棋士古力九段昨日公开悬赏10万元人民币，想知道他的真面目。而截至今日，Master已取得最少55胜。 Ｍaster由上月29日（上周四）起，现身不同围棋对奕网站，他上周四先到中国《奕城网》，3日内像龙卷风般连胜多名高段数棋手，包括韩国朴廷桓及中国柯洁，在取得30连胜后，他转战另一围棋平台《野狐网》，一连击败中国古力、李钦诚等中国九段棋士，连被称为日本最强棋士的井山裕太也败下阵来。 由于Master与朴廷桓、陈耀烨以及连笑的对战模式为“20秒3次”超快棋，结果以“4：0”、“2：0”和“2：0”全胜…	2017-01-04	明报	即时国际		823
京城台湾咖啡馆 成首家繁体字私塾 08:00	http://china.hket.com/article/1620688/	北京有家咖啡馆，只要客人肯在临摹本上学写繁体字，结帐便可打9折。这家名叫“繁体字”的咖啡馆，近来吸引了不少内地民众前往，来自台湾的老板娘对繁体字的热爱也感染了许多顾客。 只要客人学写繁体字 结帐便可打9折 据中央社报道，这家咖啡馆隐身在离南锣鼓巷不远的小巷中，店门上挂著简约的“繁体字”招牌。咖啡馆内摆放著大量的繁体书，还有复古的“繁体字”临摹本。 老板娘李雪莉从台湾到北京已10多年，她出身中文系，因为热爱文字，在店内“兼差”教起了繁体字，并教学生认识汉字的演变和部首的含意，使得咖啡馆变成京城第一家教繁体字的私塾。 很多人认为李雪莉这么做是对中国文化负有很强的使命感，但她强调，这只是纯粹兴趣，基于对文字的喜爱才开课，“其实真的就是想做就做。” 她说，自己读简体字小说很难被感动，想了好多年才发觉，也许是因为简体字无法呈现出一些文字背后的意思。例如“发”的笔划多，有种发细如丝的感觉；而“发”的…	2017-01-12	经济日报	即时中国		879
微博“手写热” 掀繁体字学习潮	http://china.hket.com/article/1652788	【本报讯】微博近年来吹起一股“手写热”，许多内地网友会在自己的微博上传送手写诗句、经文与朋友分享，这也带动内地民众学习繁体字的兴趣。 台湾的中央社报道，在微博上，可以看见许多网友分享各类繁体字体，许多属于书法字体，而民众抄写的文字也以新诗与佛经等为主。 网友：繁体字更显厚重 有微博网友表示，喜欢繁体字是有原因的，小学之前就开始接触书法，很多字帖都是繁体字，所以先入为主地喜欢。追究底蕴来说，也是繁体字更显厚重。 此外，这几年也开始有许多人在内地开设繁体字课程，也有内地网友在网上分享学繁体字的心得。 有内地网友在社群讨论平台知乎上提到，学繁体字并不容易，“是水磨工夫，无非熟能生巧”，最顺其自然的方法就是尽量让自己多看一些古文的书籍，熟记常见字，并可以查阅《辞源》的繁简字对照表。 也有内地网友在网络上，分享台湾教育部的常用国字标准字体笔顺学习网，透过学习笔划、笔顺、部首学习繁体字。 另外，中央…	2017-02-02	经济日报	中国要闻		613
【Emily Online】刘国勋倡国家恢复用“正体字”：正体可寻回中华文化 09:06	http://news.mingpao.com/ins/instantnews/web_tc/article/20170502/s00001/1493687248108	民建联立法会议员刘国勋于facebook表示，“正体可寻回中国源远流长的中华文化”，希望国家未来恢复使用“正体字”。 刘国勋昨日于fb上载多张相片，刘国勋指，指自己在内地“随意走走”，并到了久违的书城买书。他表示，从前因在内地买书便宜，故经常回内地买书，“懂得繁体字的，基本很快便能看得通简体字”，而他今次“重访”书城，找到了“流沙河”撰写的《正体字回家》一书，形容“正体可寻回中国源远流长的中华文化，希望国家在未来恢复使用正体字”。 刘国勋又特别标签了“#正体字回家”、“#恢复繁体字”及“#中华文化”等。 除了讲述“正体字”，刘国勋亦谈及近日于香港开市的共享单车服务 GoBee.bike，他表示， GoBee.bike近日在香港成为热话，但其实内地早已由政府推动固定地点公共单车，发展到由私营的共享单车。	2017-05-02	明报	即时港闻		390
【Emily Online】刘国勋：简体字历史任务已算完成 盼国家以繁体字为正 13:37	http://news.mingpao.com/ins/instantnews/web_tc/article/20170503/s00001/1493785835726	民建联立法会议员刘国勋前日于facebook上表示，希望国家未来恢复使用“正体字”，因为可以寻回中国源远流长的中华文化。刘国勋昨日再于fb谈及繁体字及简体字问题，直言“现时简体字的历史任务可算是完成”。 刘国勋表示，过去国家使用简体字是希望可以提高识字率，但近年教育相对普及，“简体字的历史任务可算是完成”。他认为，繁体字有源远流长的中国文化在内，希望国家可以恢复繁体字的官方地位，简体字则可以在民间流通。 刘国勋亦特别标签了“因时制宜”、“文字演变”及“一孩政策亦已放宽”等，又指将会分享更多有关繁简体历史演化的资料。 另外，《立场新闻》昨日报道，一篇刊登在《港人讲地》，标明由刘国勋撰写的文章，涉嫌抄袭《立场新闻》其中一位作者“金融Loser”文章。 《港人讲地》今日发出更正启事，指“当日网上捞取文章过程出现技术性错误，把该文章误以为属于本网博客、立法会议员刘国勋”。《港人港地》表示，已将文…	2017-05-03	明报	即时港闻		485
来港翌日繁体字条劫银行 辽宁汉囚3年	http://www.stheadline.com/inews-content.php?cat=a&nid=112858	四十九岁辽宁汉于去年十二月到尖沙咀富邦银行，向柜枱出纳员出示以繁体字打印的勒索字条表示“想要钱”，惟出纳员告诉内地汉要钱便需要其身份证，并暗中通知主管报警，期间出纳员继续拖延对方，着对方稍候，辽宁汉照做；而其他职员亦不着痕迹疏散客人，不久警方到场将内地汉拘捕。被告孙静早前在区域法院承认勒索及在公众地方管有攻击性武器两罪，今被判监3年。 法官判刑时指，被告在银行这公众地方犯案，有一定严重性，而他所使用的纸条有威吓性，会令事主及其他职员受惊，因当时他们不知被告是否会有进一步行动。被告勒索200万巨额显示他极为贪心，而且他事先准备繁体字的字条亦显示他有预谋。另因被告是来港犯案，在来港第二天即犯案，故加刑6个月，终判囚3年。 法庭记者：黄显晴	2017-06-12	头条日报	即时港闻		345
漫画家松本零士睇繁体字回味过去	http://orientaldaily.on.cc/cnt/entertainment/20170915/00282_122.html	著名日本漫画家、79岁的大师松本零士早前来港宣传展览活动，接受本报访问时透露《银河铁道999》40周年将制作新动画，而《千年女王》与《宇宙海盗夏罗古》亦计划拍真人版电影，目前仍在物色人选。他直言热爱香港的繁体字：“我对中国文化有好深了解，细个睇好多古文、古诗，尤其有印象系峨眉山。嚟到香港睇到用繁体字，好有亲切感，好似坐咗时光机返到以前。” 被问到保健秘诀时，他自言小时候很顽皮，上山下海，认为少壮做运动，老大更健康：“不过依家啲细路太受保护，我以前去玩嘅地方依家都变咗禁区。”其太太牧美也子也是漫画家，他表示：“我哋会互相提点，但唔会影响对方创作。”	2017-09-15	东方日报	本地娱乐		289
《千年女王》松本零士热爱香港繁体字 (07:15)	http://m.on.cc/nc/ent/20170915/20170915071542en.html	【on.cc东网专讯】创作《千年女王》与《银河铁道999》等经典动漫的79岁日本动漫大师松本零士，早前来港宣传“零士·FUTURE IN HONG KONG 2017”展览活动，期间接受东网访问，他被问到会否与大陆的主题公园合作时，表示未有计划，并补充自己很喜欢中国文化，香港正正保留中国文化的精华：“我对中国文化有好深了解，细个睇好多古文古诗，尤其有印象系峨眉山，我嚟到香港睇到用繁体字，好有亲切感，好似坐咗时光机返到以前咁。” 电影版人选未定 今年是《银河铁道999》推出40周年，松本零士表示会制作新动画，他感慨指人生有限，自言现在继续其儿时梦想，觉得人生旅程还未完结。而《千年女王》与《宇宙海盗夏罗古》亦计划拍摄真人版电影，松本零士表示：“电影版同漫画版系会有小小分别，我哋谂紧点样可以改编得自然。”他又指目前仍然在寻找合适的主角人选，有可能会在舞台剧版的演员中挑选。 少壮做运动 老大更健…	2017-09-15	东方日报	即时娱乐		762
基层交职津文件遭弹回头 不懂繁体字难填表 (01:00)	http://m.on.cc/nc/hknews/20180429/20180429010008lc.html	【on.cc东网专讯】任职家务助理的在职家庭津贴申请人叹说，职津要求雇主填写工作证明，惟她担心麻烦雇主太多而影响工作，过去申请低津时只能递交自我申报的工作记录声明书，却惨遭“弹回头”，最终幸获社工协助，始能顺利填妥整份低津表格及工作记录声明书，她寄望当局简化申请职津程序，令更多基层获批津贴。 四十岁的罗女士七年前从内地来港，与一对子女住在深水埗一个月租四千三百元港元的八十呎劏房。为照顾年幼子女，罗女士只能当家务助理，为两名雇主打工，月入约九千港元。不过，由于平日忙于工作及照顾子女，电视也无暇观看，加上不太懂繁体字，当年推出低津，亦是经社工落区宣传时才获悉。 记者当日全程观察罗女士填写职津新表格，她在社工协助下花上廿二分钟完成，尚未计算稍后整理文件等程序。她填写工时部分时明显要社工多加提醒，例如需详细填写过去半年的工时状况。 在内地读书至中六程度的罗女士坦言，至今仍不习惯阅读及书写繁体字，…	2018-04-29	东方日报	即时港闻		579
我爱繁体字	http://premium.mingpao.com/cfm/Content_Column.cfm?Channel=vy019&Path=67402916762/vy019.cfm	【明报文章】中文是世上最美最丰富的文字。它的特性是它是象形文字，每一个方块字都是一幅或形似或抽象的图画，每个构成部分都有自己的意义，合起来的关系，又给予这个字多一层意义。例如你看“上”字，横的一笔是地平线，在线之上，自然就是“上”的意思了；相对“下”，就是地平线之下。古写像“二”的字，其实与“上”同，所以“仁”，就是人性之中最好的特质，而“元”就是众人之中排第一的了。又比如“早”，太阳在上，“昏”，太阳已下山了。 文字隐含我们的文化历史。最香的“香”，是禾稻在晒太阳；“家”是屋檐下养着大肥猪；两个字已道出了我们以农业为生的渊源。文字还有禅味，“舍”的动作，右边是“舍”，即小旅馆、歇脚处，“舍”上部是个瓦顶，中部是个招客饮的布帘，下部大概是人马休憩的空间？客舍何暂留，竟然爱之恋之，难舍难分？ 明白字的来历和意义就不会失礼。“获”是本人狩猎所得；因此我每见某人“获”委任什么公职就头痛，这个说…	2018-05-14	明报	作家专栏	吴霭仪	562
指语文教育须检讨 港大李辉：小朋友功课多因繁体字笔划太多 操练写得辛苦 16:43	http://news.mingpao.com/ins/instantnews/web_tc/article/20180510/s00001/1525940928125	当香港土生土长语言学家，遇上从内地来港的语言学家，会擦出什么火花？中大中文系前高级讲师欧阳伟豪（Ben Sir）及港大教育学院副教授李辉，就在港台节目从粤语与普通话，繁体字与简体字，再谈到通识科问题。 节目第一回合，就是近日热论的广东话是否港人“母语”。欧阳伟豪指，从一般人角度，母语是“我们一出世，在阿爸阿妈在家学出来的语言，就是母语”，认为教育局引用中大普通话教育研究及发展中心荣誉专业顾问宋欣桥的有关文章，并不妥当。他解释，香港有很多语言学家、教育学家，质疑教育局选取这篇文章的动机，重申“未够精准及代表性”。 欧阳伟豪又提到，港大中文教育研究中心总监谢锡金研究“普教中”及“粤教中”问题：“有研究出来不引用，你给钱学者做完出来，社会又不去引用，这个是算什么呢？” 李辉则说，香港人“口语”是广东话，但他表示人类语言分两种形式，一种是“书面语”，一种叫“口语”：“香港人口语无疑问是广东话，但…	2018-05-10	明报	即时港闻		1347
【小一派位】不满远派青衣 福田家长因繁体字坚持留港	http://www.stheadline.com/inews-content.php?cat=a&nid=124648	升小统一派位今日放榜，为跨境生而设的专用校网，有家长在派位中心失望而回。家住福田口岸附近的杨氏一家，女儿获派至青衣，杨先生对结果感到失望，表示会叩门，直至获得心仪学校录取。“我对小孩有信心，如果叩门的学校不取录她，应该是香港学校的问题。” 然而，杨先生并没考虑安排女儿回深圳读书， 因为认同香港功课量较多，可为孩子打好根基；加上香港书写繁体字，能培养孩子对中国文化的认识。 教育局为跨境生设立的专用校网，今年7区合共提供2156个学额，其中北区占一成三学额。不过，随著深圳政府去年放宽双非儿童，入读当地公立学校的限制，跨境生人数开始回落，今年较往年历史高峰大跌三成。	2018-06-02	头条日报	即时港闻		307
【小一派位】不满远派青衣福田家长因繁体字坚持留港 13:21	http://std.stheadline.com/instant/articles/detail/730960-%E9%A6%99%E6%B8%AF-%E3%80%90%E5%B0%8F%E4%B8%80%E6%B4%BE%E4%BD%8D%E3%80%91%E4%B8%8D%E6%BB%BF%E9%81%A0%E6%B4%BE%E9%9D%92%E8%A1%A3+%E7%A6%8F%E7%94%B0%E5%AE%B6%E9%95%B7%E5%9B%A0%E7%B9%81%E9%AB%94%E5%AD	升小统一派位今日放榜，为跨境生而设的专用校网，有家长在派位中心失望而回。家住福田口岸附近的杨氏一家，女儿获派至青衣，杨先生对结果感到失望，表示会叩门，直至获得心仪学校录取。“我对小孩有信心，如果叩门的学校不取录她，应该是香港学校的问题。” 然而，杨先生并没考虑安排女儿回深圳读书，因为认同香港功课量较多，可为孩子打好根基；加上香港书写繁体字，能培养孩子对中国文化的认识。 教育局为跨境生设立的专用校网，今年7区合共提供2156个学额，其中北区占一成三学额。不过，随著深圳政府去年放宽双非儿童，入读当地公立学校的限制，跨境生人数开始回落，今年较往年历史高峰大跌三成。	2018-06-02	星岛日报	即时香港		306
【简体字风波】香港国际学校谁以繁体字教中文？ 10:52	http://news.mingpao.com/ins/instantnews/web_tc/article/20180606/s00001/1528251661157	英国著名学府哈罗公学（Harrow School）香港分校“哈罗香港国际学校”决定由2019学年起，全面以简体字教授小一至小五中文课程，原因是要为学生面对“2047年的香港”作准备，引起家长不满。家长刘小姐向《明报》表示，作为香港人，期望子女能学习繁体字，让他们看报纸、餐牌和看电影等香港日常生活中，可认读中文字。她质疑香港政府也未曾说2047年时的香港“不会有繁体”，为何校方要自行判断，更改教学方式，批评是“取去（其子女）学习自己语言的权利”。 8月起全以简体字教中文 哈罗香港分校：为2047年的香港做准备 本港国际学校林立，不同学校语文教学政策不同，繁简中文各有学校采用，记者根据学校官方网页及过去访问等资料，整合如下： 繁体字中文教学: 汉基国际学校 汉基各个年级学生都须学习中英双语，而很多年级都开设初级中文课程，学校使用传统的中文繁体字，简体字只用于中文初级班、之前只学过简体字的学生…	2018-06-06	明报	即时港闻		810
【简体字风波】改简体字教中文惹家长不满 哈罗：推更多用繁体字的课外活动 15:18	http://news.mingpao.com/ins/instantnews/web_tc/article/20180606/s00001/1528268991912	哈罗香港国际学校决定2019学年起以简体字教授中文课程，引起家长不满。校方强调，是听取不同意见及经详细讨论后才作改动，校方将推出更多使用繁体字的课外活动。 哈罗香港国际学校早前证实，2019年8月起，分阶段调整语文课程的内容，其中一项调整，是集中资源以简体字教授中文。校方相信，采用单一中文书写法，会让学生更聚焦和清晰地学习中文，同时会推出更多使用繁体字的课外活动，让学生对中文有更广阔的了解。 校方表示，是听取了不同意见及经详细讨论后，才作有关改动，强调非常重视家长意见，并将透过不同已设的咨询渠道，继续与家长保持紧密沟通，务求为学生提供最优质的教育体验。	2018-06-06	明报	即时港闻		303
【升中派位】住木屋苦读获派第一志愿 新移民女生：每日听写50个繁体字	http://www.stheadline.com/inews-content.php?cat=a&nid=154525	升中派位今日公布结果，五年前面临杀校危机的浸信会天虹小学，经由校长朱子颖改革成“Happy School”后，入读人数攀升；今年54名小六毕业生中，九成四学生获派首三志愿，及有七成六学生获派首志愿，获派中学包括中华基督教会协和书院，及迦密柏雨中学等。 天虹小学有不少新移民学生，当中两年前由深圳来港、现居住在大埔山上木屋的曾英莉，获派第一志愿迦密柏雨中学，她说非常开心，会和家人吃龙虾庆祝。曾英莉来港时不懂说广东话，曾感到不适应，妈妈为了帮助她克服困难，每日准备50个繁体字作听写，及使用广东话作日常对答，现今她已能纯熟运用广东话，相信自己不难融入中学群体。 曾英莉一家五口住在大埔木屋区，轮候公屋已达数年，她坦言努力读书是希望改善居住环境，希望在不久将来可以入住公屋。英莉特别感谢任教常识科的班主任吴老师，“吴老师对我说『你是你本身的传奇』，令我很感动，希望可追梦，目标日后成为插画师”。	2018-07-10	头条日报	即时港闻		419
【升中派位】住木屋苦读获派第一志愿新移民女生：每日听写50个繁体字 12:30	http://std.stheadline.com/instant/articles/detail/761890-%E9%A6%99%E6%B8%AF-%E3%80%90%E5%8D%87%E4%B8%AD%E6%B4%BE%E4%BD%8D%E3%80%91%E4%BD%8F%E6%9C%A8%E5%B1%8B%E8%8B%A6%E8%AE%80%E7%8D%B2%E6%B4%BE%E7%AC%AC%E4%B8%80%E5%BF%97%E9%A1%98+%E6%96%B0%E7%A7%BB%E6%B0	升中派位今日公布结果，五年前面临杀校危机的浸信会天虹小学，经由校长朱子颖改革成“Happy School”后，入读人数攀升；今年54名小六毕业生中，九成四学生获派首三志愿，及有七成六学生获派首志愿，获派中学包括中华基督教会协和书院，及迦密柏雨中学等。 天虹小学有不少新移民学生，当中两年前由深圳来港、现居住在大埔山上木屋的曾英莉，获派第一志愿迦密柏雨中学，她说非常开心，会和家人吃龙虾庆祝。曾英莉来港时不懂说广东话，曾感到不适应，妈妈为了帮助她克服困难，每日准备50个繁体字作听写，及使用广东话作日常对答，现今她已能纯熟运用广东话，相信自己不难融入中学群体。 曾英莉一家五口住在大埔木屋区，轮候公屋已达数年，她坦言努力读书是希望改善居住环境，希望在不久将来可以入住公屋。英莉特别感谢任教常识科的班主任吴老师，“吴老师对我说『你是你本身的传奇』，令我很感动，希望可追梦，目标日后成为插画师”。	2018-07-10	星岛日报	即时香港		419
以物易物宣扬繁体字	http://stepaper.stheadline.com/news_content.asp?newsid=S04164.txt&newscat=S&newsdate=2018-07-14	以物易物可似是史前活动，却有助文化交流？小记有幸用本报制作的世界杯特刊《王者战纪》，和俄罗斯人Anastasia换得一块八○莫斯科奥运纪念章，并互相了解港俄不同的特色。 Anastasia矢志以另类方式响应世杯狂热，在大街小巷主动跟各国球迷以物易物，早前更换得港足打气巾。当她收到小记的《王者战纪》时欣喜若狂，大赞繁体字是她见过最美丽文字之一：“这种文字相当有气势，结构非常复杂，背后一定有深厚的文化渊源。” 小记则换得一块八○莫斯科奥运襟章，她指至今俄罗斯人对当届奥运仍相当骄傲，相信世杯将成为另一美好回忆。经过是次交流，不禁让小记反思花钱买纪念品，藉口话了解当地文化，实质只是形式主义。 采访手记	2018-07-14	星岛日报	体育		335
以物易物宣扬繁体字	http://stepaper.stheadline.com/news_content.asp?newsid=S04208.txt&newscat=S&newsdate=2018-07-14	以物易物可似是史前活动，却有助文化交流？小记有幸用本报制作的世界杯特刊《王者战纪》，和俄罗斯人Anastasia换得一块八○莫斯科奥运纪念章，并互相了解港俄不同的特色。 Anastasia矢志以另类方式响应世杯狂热，在大街小巷主动跟各国球迷以物易物，早前更换得港足打气巾。当她收到小记的《王者战纪》时欣喜若狂，大赞繁体字是她见过最美丽文字之一：“这种文字相当有气势，结构非常复杂，背后一定有深厚的文化渊源。” 小记则换得一块八○莫斯科奥运襟章，她指至今俄罗斯人对当届奥运仍相当骄傲，相信世杯将成为另一美好回忆。经过是次交流，不禁让小记反思花钱买纪念品，藉口话了解当地文化，实质只是形式主义。 采访手记	2018-07-14	星岛日报	体育		335
IB料2020年取消MYP繁体中文评核 弘立书院称无意停教：香港写繁体字 17:12	http://news.mingpao.com/ins/instantnews/web_tc/article/20180908/s00001/1536391340628	IB国际文凭课程中学项目（Middle Years Programme，下称MYP）繁体中文校外评核（eAssessment），因为考生人数少，料在2020年起取消。以繁体教授中文IB课程的弘立书院，今早举行小学入学简介会。总校长查永茂表示，无计划停止教授繁体字，解释书院是香港学校，香港写繁体字便教繁体，让学生“写繁体，认识简体，打拼音（输入法）”。 弘立书院今早举行3场简介会，分别以英语、普通话和广东话进行，其中广东话的简介会，有台下家长问及，校方对繁体字有多坚持，会否3至5年转教简体字。总校长查永茂回应说，作为独立的香港学校，该校“committed to Hong Kong and Hong Kong community（对香港和香港社会有承担）”，香港写繁体字，因此会教繁体字。 该校以普通话和繁体字教授中文，查永茂补充，学生语言应该国际化（linguistically globa…	2018-09-08	明报	即时港闻		644
弘立书院校长：无计划停教繁体字	http://premium.mingpao.com/cfm/Content_News.cfm?Channel=gb&Path=33702118031/gbm1.cfm	【明报专讯】国际预科文凭课程（IB）中学项目（Middle Years Programme）繁体中文校外评核（eAssessment）因考生人数少，或2020年起取消繁体字评核。以繁体教授IB中文课程的弘立书院昨早举行小学入学简介会，吸引近千人到场。总校长查永茂表示无计划停止教授繁体字，解释该校是香港学校，香港写繁体字便教繁体，指学生“写繁体，认识简体，打拼音（输入法）”。 指不“闭门造车” 须认识简体打拼音 弘立书院昨早举行3场2019/20学年入学简介会，分别以英语、普通话和广东话进行，其中在广东话场次，有家长问及校方对繁体字是否有坚持，会否3至5年内转教简体字。查永茂回应说，作为独立的香港学校，该校“committed to Hong Kong and Hong Kong community（对香港和香港社群有承担）”，香港写繁体字便教繁体字。 查永茂认为，以繁体字教授中文基础，可…	2018-09-09	明报	港闻		804
繁体字市场未死 Amazon正式推繁体中文电子书 11:54	https://wealth.hket.com/article/2366057	大家有阅读电子书的习惯吗？姜饼人一直都有关注电子书市场的发展，也备有一部Kindle电子书阅读器在家。过往，Amazon只有英文书籍，削弱了Kindle对华文市场的吸引力。 最近，Amazon正式开通了繁体中文电子书的服务，让一众爱阅读中文书但家中苦无藏书之地的香港人，多了一个读书的平台。 2万多册繁体电子书供下载 Amazon合共推出约2万多册繁体中文电子书供全球Kindle用户下载购买，相信随著更多的出版商加入，会有更多的书种供用户选择。 姜饼人查过， 现时在Amazon 上架的台湾中文出版商包括“时报出版”、“天下出版”、“先觉出版”、“商周出版”、“三采文化”、“大块文化”、“远流出”版等等，但所包括的书目，就姜饼人印象而言，都不算是全新的书目。 有趣的是，中美贸易战如火如荼，中联办旗下的出版机构，包括“三联书店”、“中华书局”及“商务印书馆”，都成为了Amazon的合作伙伴，把…	2019-05-31	经济日报	即时博客		1366
【拆信检查】职员称不准寄繁体字信 河北邮局：佢理解错咗	https://www.am730.com.hk/news/%E6%96%B0%E8%81%9E/%e3%80%90%e6%8b%86%e4%bf%a1%e6%aa%a2%e6%9f%a5%e3%80%91%e8%81%b7%e5%93%a1%e7%a8%b1%e4%b8%8d%e5%87%86%e5%af%84%e7%b9%81%e9%ab%94%e5%ad%97%e4%bf%a1-%e6%b2%b3%e5%8c%97%e9%83%b5%e5%b1%80%ef%bc%9a%e4%bd%a2%e7%90	内地网络近日流传，河北邢台隆尧县康庄路邮政支局的职员，竟在民众寄平邮信时开信检查是否有繁体字，称一旦发现有繁体字就会拒收，又指若觉得被冒犯，可选择用其他方法寄信，还出示一份“扫黄打非”责任书，上面提到不准收寄的物品，包括“煽动颠覆国家政权、推翻社会主义制度或者分裂国家、破坏国家统一、危害国家安全的”，惟责任书并未提到要拆信检查。 内地传媒昨报道，事件发生在两个月前，事后曾有记者到邢台其他邮政支局测试寄平邮信，均未被拆信检查，且职员都表示“除了信，都得验”，并强调不用拆信。隆尧县邮政公司副总经理葛晓杰回应称，国家邮政法相关规定的确要求检视邮件，以免收寄违禁品，但工作人员在理解和实际操作中出现偏差，目前已经整改，日后亦会加强员工培训，避免再出现类似情况。 此外，报道指，内地有规定，除因国家安全或者追查刑事犯罪的需要，由公安机关或者检察机关按法律规定的程序检查通信外，任何组织或个人不得以任何理…	2019-06-10	am730	新闻		457
河北邮局拆信检查繁体字 官方：职员理解或有偏差已整改	http://www.stheadline.com/inews-content.php?cat=e&nid=115733	据内地传媒报道，在河北邢台一间邮局，有职员会打开民众所寄的信件，若发现当中有繁体字，邮局会拒绝接收。官方其后回应指表示，是职员失误，已作出整改。 据网上流传的影片可见，有民众到隆尧县一间邮局寄信时，职员在事主面前企图拆开信件，事主阻止及询问原因，职员则回应指要检查信中是否有繁体字，若有繁体字邮局则会拒绝接收。事主质疑职员看信中的内容会侵犯私瘾，但对方则回应指，当着投递人拆开信件则没有问题。该职员又指，若事主不愿拆开信件，可选择不投寄，或不透过邮局寄信。另外，职员又提供一份“扫黄打非”责任书，书中提到不准收寄的物品，但并未提到需要拆信验收。 邮政公司负责人其后表示，事件发生于今年4月，并指按照邮政法规定，为了避免邮寄中出现违禁品，需检视邮件。然而，他续指，职员在理解及操作中可能出现偏差，已随即作出整改，并指日后会加强职员培训，避免类似情况出现。	2019-06-10	头条日报	即时中国		388
河北邮局拆信检查繁体字官方：职员理解或有偏差已整改 19:38	http://std.stheadline.com/instant/articles/detail/1019615-%E4%B8%AD%E5%9C%8B-%E6%B2%B3%E5%8C%97%E9%83%B5%E5%B1%80%E6%8B%86%E4%BF%A1%E6%AA%A2%E6%9F%A5%E7%B9%81%E9%AB%94%E5%AD%97+%E5%AE%98%E6%96%B9%EF%BC%9A%E8%81%B7%E5%93%A1%E7%90%86%E8%A7%A3%E6%88%96%E6%9	据内地传媒报道，在河北邢台一间邮局，有职员会打开民众所寄的信件，若发现当中有繁体字，邮局会拒绝接收。官方其后回应指表示，是职员失误，已作出整改。 据网上流传的影片可见，有民众到隆尧县一间邮局寄信时，职员在事主面前企图拆开信件，事主阻止及询问原因，职员则回应指要检查信中是否有繁体字，若有繁体字邮局则会拒绝接收。事主质疑职员看信中的内容会侵犯私瘾，但对方则回应指，当着投递人拆开信件则没有问题。该职员又指，若事主不愿拆开信件，可选择不投寄，或不透过邮局寄信。另外，职员又提供一份“扫黄打非”责任书，书中提到不准收寄的物品，但并未提到需要拆信验收。 邮政公司负责人其后表示，事件发生于今年4月，并指按照邮政法规定，为了避免邮寄中出现违禁品，需检视邮件。然而，他续指，职员在理解及操作中可能出现偏差，已随即作出整改，并指日后会加强职员培训，避免类似情况出现。	2019-06-10	星岛日报	即时中国		388
疑扫黄打非 如有繁体字拒绝接收 河北邮局拆信检查侵私隐	https://www.singpao.com.hk/index.php?fi=news8&id=103425	河北邢台隆尧县一家邮局近期在柜枱收件时，强行拆开寄信人信件查验，如果信件内有繁体字邮局拒绝接收，并提供一份“扫黄打非”责任书。不过，责任书中提到不准收寄的物品，却未提到需要拆信验收，这个举动遭到当事人反对和异议，事件亦引发热议，认为内地邮局的做法是侵犯私隐，一众网民亦质疑为何繁体字有问题。邮政局则回覆工作人员对规例的理解存在偏差，已要求整改，并会加强业务培训。 本报两岸组报道 事件中的寄信人不满邮局拆信检查的做法，拍下经过并上载网上，而根据视频显示，该名民众到隆尧县一个邮政支局寄信，收信职员当面企图拆开信件，事主阻止并询问原因；职员则回应指要检查信中是否有繁体字，若有繁体字邮局则会拒绝接收。事主质疑职员看信会侵犯隐私，职员竟回应：“当着大家的面就没有事”、“不看内容，看你字体是不是繁体字”。女职员又指事主若不愿意拆开信件，可选择不投寄，或者不透过邮局寄信。 另外，职员又向事主提供一份“扫…	2019-06-11	成报	国际两岸		1110
法籍摄影师 镜头捕捉香江“诗意” 冀以艺术力量 保育广东话正体字	https://paper.hket.com/article/2377927	“我觉得广东话和正体字是香港人的根。”这句说话并非出自甚么语言学者，而是一个金发蓝眼的异乡人。 法籍摄影师积浩明（Romain Jacquet-Lagreze）9年前移居香港，甫踏足已爱上这人口稠密的城市，更开始拿起相机创作，用镜头捕捉市区景观和老铺人情。他的最新作品《城市诗意》，便拍摄了超过1,000个特色招牌中文字，重组成有意思的“诗句”。 正在学讲广东话和写正体中文的他，深恐这历史悠久的语言逐渐被普通话和简体字完全取代，冀以艺术的力量引起港人关注，保育这广东文化的根源。 相展九个“龙”字 代表九龙 “猜猜是甚么意思？”积浩明指着墙上的九个“龙”字，跟记者玩起猜谜游戏，“九个龙字，是代表九龙（Kowloon）！”他在上环举行的最新相展《城市诗意》，将不同店铺招牌的中文字重组成有意思的句子，居中的“香港文化”四只大字，便反映他对本土语言和文字的热枕。 今年32岁的积浩明在巴黎长大，于东…	2019-06-17	经济日报	要闻	岑志刚	1678
亚马逊卖“港独”T恤《环时》：挑衅一国两制繁体字配英文多种反华言论	http://stepaper.stheadline.com/news_content.asp?newsid=A24070.txt&newscat=A2&newsdate=2019-08-16	香港反修例风波及台湾大选临近，引发内地网民在全球发起新一轮“反分裂风暴”，多个国际品牌因为把港澳台列为“国家”而遭抵制。最新一宗是美国电商巨企亚马逊被指在其平台上公然销售“港独”T恤，上面印着繁体中文“香港独立”等字样。北京《环球时报》警告，亚马逊此举严重挑衅“一国两制”的基本原则，该公司信誉和在中国人心中的形象将大打折扣。亚马逊暂未作出回应。 本报中国组 网友前天在社交网站上爆料，亚马逊平台正销售一款红色“港独”T恤。上面印着“FREE HONG KONG DEMOCRACY NOW（现在就让香港民主）”，同时配有繁体中文“香港独立”。很快有其他网友跟进称，亚马逊平台上还有大量“港独”T恤，不仅有红、黑、蓝等多种颜色，图案更是印有“反送中”、“香港没有引渡”、“香港不是中国特别行政区”等多种“反华”言论。 “香港不属于中国” 《环球时报》记者十四日在亚马逊官网上也发现多款“港独”T恤，…	2019-08-16	星岛日报	中国		1044
引入余光中诗捍卫繁体字 诗人流沙河病逝 享年88	http://premium.mingpao.com/cfm/Content_News.cfm?Channel=ca&Path=33719177081/ccb1.cfm	【明报专讯】内地诗人、作家、学者流沙河（图）昨日下午在四川成都因喉癌并发症逝世，享年88岁。流沙河曾写下“理想是石，敲出星星之火”等著名诗句，也因诗4次被中共领袖毛泽东点名为“大右派”，他最早在大陆推介余光中等台湾诗人的作品，又捍卫繁体字，指“每一个简体字都无法证明其存在的理由”。 曾因诗获罪 毛泽东4次点名“大右派” 本名余勋坦的流沙河1931年出生于四川金堂县，早年在《川西农民报》做副刊编辑，1957年参与创办中共建政后内地首份官办诗刊《星星》，他笔耕不辍，著有小说、诗歌、诗论、散文、翻译小说、研究专著等22种，两首诗作被收录入内地中学语文课本。1982年，他在《星星》上刊出20首余光中诗作，最早将余诗引入大陆，其后又陆续介绍郑愁予、弦、洛夫等台湾诗人。 1950年代，流沙河因诗获罪，被毛泽东4次点名为“大右派”，曾扫厕所、拉粮食、种棉花，文革时被下放锯木工厂，还被抄家12次。他说…	2019-11-24	明报	中国新闻		601
教育部：汉字简化历史久趋势显著 首度回应政协教繁体字提案 促学校依法用简体字	http://premium.mingpao.com/cfm/Content_News.cfm?Channel=ca&Path=67438638062/cca1.cfm	【明报专讯】近几年全国两会都有全国政协委员提案建议“在全国中小学进行繁体字识读教育”，教育部日前首次答覆，指汉字由繁趋简发展演变趋势十分显著。简化字发展已有3000多年历史。因此学校教学应依法使用规范汉字。 称具群众基础有体系 全国政协委员韩方明今年3月在北京全国两会提交提案指出，简化汉字60多年来，在诸多方面存在弊端，学术界专家有过许多论述，而且在实践中也出现大量实际问题，主要是“因简害义、有损汉字的艺术美和规律性、不利文化的历史传承”。目前使用汉族中文的国家和地区中，除中国大陆地区和新加坡以外，在台湾、香港、澳门和马来西亚等均使用繁体汉字。 观察者网报道，教育部上周五（6日）在官网公开相关答覆时称，早在甲骨文和金文中，汉字就有了简体形式；南北朝以来楷书、草书、行书中也不断有简体字产生。现行简化字即遵循约定俗成的原则，通过搜集、整理、筛选千百年来在民间通行的简体字，在广泛征求意见基础确…	2019-12-09	明报	中国新闻		926
调查：73.9%内地网民支持学习繁体字	https://www.am730.com.hk/news/%E6%96%B0%E8%81%9E/%e5%8d%97%e6%96%b9%e9%83%bd%e5%b8%82%e5%a0%b1%e8%aa%bf%e6%9f%a5%ef%bc%9a73-9%e5%85%a7%e5%9c%b0%e7%b6%b2%e6%b0%91%e6%94%af%e6%8c%81%e5%ad%b8%e7%bf%92%e7%b9%81%e9%ab%94%e5%ad%97-199825	在今年两会期间，有政协委员提交《全国中小学进行繁体字识读教育的提案》，内地教育部回应指学校教学应依法使用规范汉字(简体字)，但指中小学经典阅读及书法教育中，已涉及繁体字内容。对于是否需要在中小学推行学习繁体字，引起内地网民热议。 内地《南方都市报》就此发起网络调查，截至本月10日中午，共有2,506位网民参与讨论，73.9%网民认为有必要学习繁体字，57.6%网民同意在全国中小学进行繁体字识读教育。支持者认为，繁体字作为中国文化一部分应该传承。反对意见则指出学生课业负担已经够重，没必要再额外增加压力。 调查更发现，通过看TVB等带有繁体字幕的影视剧，是最多网民学习繁体字的途径，比重高达63%，亦有43.5%网民通过古书、古典武侠小说等学会。在支持学习繁体字的网民中，有45.7%网民认为有需要时自学就好，亦有41.3%的人认为应该在学校里系统学习。	2019-12-11	am730	新闻		390
繁体字的文化承载不应被过度放大	http://www.hkcd.com/content/2020-03/20/content_1184310.html	去年的这个时候，有一份《关于在全国中小学进行繁体字识读教育的提案》引发关注。教育部前不久在官网公开相关答复，提出“学校教学应依法使用规范汉字，但在中小学经典阅读和书法教育中，会涉及繁体字教育有关内容”。 其实关于汉字的简化，自古有之，甚至历朝历代都做过相关工作，民间更为流行。众所周知，在汉字自身的演变中，最明显的就是“隶变”，即由篆书变为隶书，使得字体更趋于简单、规范、方正，因此隶书也被称为“篆之捷”。总的来讲，文字的简化主要是为了实用，方便学习、辨识、普及、推广、交流之需，并且要清楚，简体字并非随意简化的，也具有它很强的历史继承性、体系性和深厚的群众基础。 不过对此有人会说，汉字简化破坏了传统，影响了传统文化的传承，会出现“因简害义”“有损汉字的艺术美和规律性”等问题。不可否认，的确存在这些情况，毕竟一些繁体字比其简体字在音形义等方面都表现得更加丰富，更具内涵，而且古代也有“汉字六书”…	2020-03-20	香港商报	即时新闻		1411
田北辰倡普通话会话纳DSE考核繁体字不可取代16:04	https://hd.stheadline.com/news/realtime/hk/2092267/即時-港聞-田北辰倡普通話會話納DSE考核-繁體字不可取代	曾任语常会主席推动过“普教中”的立法会议员田北辰建议文凭试加入普通话口试。他又指，繁体字是不可取代，但认识简体字对将来发展有帮助。 田北辰接受电视访问时指，香港推动普通话成效十分有限，其中一个原因是不用考公开试。田北辰：“普通话其实不考也没有人读，因为社会上没有这语境，所以我认为是时候开始思考，不用立即的，可能数年後，要有时间表，文凭试中文科拨出很小百分比（考普通话），我就建议百分之十。”不过田北辰认为，普通话及简体字在香港已有法律地位，亦认为繁体字是不可取代。 田北辰：“繁体字可令学生对中文了解字型本身为何这样写，（繁体字）是容易解释很多，这情况下学生中文根基会好的。我认为，香港一定要保留繁体字，不可能简体字取代繁体字，但同时需要认识简体字。”	2021-06-06	头条日报	即时港闻		339
杨润雄：鼓励学生学习繁体字後认识简体字17:20	https://hd.stheadline.com/news/realtime/hk/2096037/即時-港聞-楊潤雄-鼓勵學生學習繁體字後認識簡體字	内地教育部於本月2日发布了《粤港澳大湾区语言生活状况报告（2021）》，提出本港应该将普通话教育适度融入考评体系，以明确普通话与简体字的法定地位。教育局局长杨润雄指，鼓励学生在学习繁体字之後能够认识简体字。 杨润雄表示，考虑到大湾区发展，港人在日常与外地市民或其他机构有很多沟通，大湾区发展会令香港与内地城市会有更多交接，相信学生充份掌握普通话及简体字对未来发展有百利而无一害。被问及会否纳入简体字教学，杨润雄则指属长远的教育问题，须要仔细考虑。	2021-06-10	头条日报	即时港闻		230
杨润雄：鼓励学生学习繁体字後认识简体字	https://std.stheadline.com/realtime/article/1596037/%E5%8D%B3%E6%99%82-%E6%B8%AF%E8%81%9E-%E6%A5%8A%E6%BD%A4%E9%9B%84-%E9%BC%93%E5%8B%B5%E5%AD%B8%E7%94%9F%E5%AD%B8%E7%BF%92%E7%B9%81%E9%AB%94%E5%AD%97%E5%BE%8C%E8%AA%8D%E8%AD%98%E7%B0%A1%E9%AB%94%E5%AD%97	内地教育部於本月2日发布了《粤港澳大湾区语言生活状况报告（2021）》，提出本港应该将普通话教育适度融入考评体系，以明确普通话与简体字的法定地位。教育局局长杨润雄指，鼓励学生在学习繁体字之後能够认识简体字。 杨润雄表示，考虑到大湾区发展，港人在日常与外地市民或其他机构有很多沟通，大湾区发展会令香港与内地城市会有更多交接，相信学生充份掌握普通话及简体字对未来发展有百利而无一害。 被问及会否纳入简体字教学，杨润雄则指属长远的教育问题，须要仔细考虑。	2021-06-10	星岛日报	即时港闻		236
大湾区购物节今开幕 淘宝手机程式“抢红包”不能用繁体字 18:03	https://news.mingpao.com/ins/%e5%85%a9%e5%b2%b8/article/20210902/s00004/1630577799675/%e5%a4%a7%e7%81%a3%e5%8d%80%e8%b3%bc%e7%89%a9%e7%af%80%e4%bb%8a%e9%96%8b%e5%b9%95-%e6%b7%98%e5%af%b6%e6%89%8b%e6%a9%9f%e7%a8%8b%e5%bc%8f%e3%80%8c%e6%90%b6%e7%b4%85%e5%8	由商务部、广东省政府和香港中联办等主办，阿里巴巴承办的首届大湾区购物节今日（2日）下午3时举行网上开幕仪式，活动将持续至9月22日，据活动方宣称，其间淘宝天猫将有粤港澳三地29.8万个知名品牌，提供1300多万件商品供选购，并送出价值超过2500万人民币（下同）的现金代用券及其他购物优惠。 据悉，获得现金代用券的方法，是在淘宝手机程式上搜索“大湾区购物节”，再将手机镜头举高向天，便会进入大湾区购物节页面，并显示一轮明月及一个可以“抢红包”的按键，按下按键即有机会获得现金代用券。 惟本报记者上午在广州测试发现，内地版淘宝需以简体字输入“大湾区购物节”才能进入页面，繁体字不可；此外只要抢到一次红包便不能再抢，并分别以3个不同帐户试抢，金额均只有0.92元。另一方面，淘宝从上午开始亦出现大量用户出售和征求大额现金代用券的帖文，也有用户投诉付费后收不到现金代用券的情况。 （明报记者）	2021-09-02	明报	即时两岸		410
日相新春贺词首加入繁体字触发回响	https://stepaper.stheadline.com/article/251773133131965/%E5%9C%8B%E9%9A%9B-%E6%97%A5%E7%9B%B8%E6%96%B0%E6%98%A5%E8%B3%80%E8%A9%9E%E9%A6%96%E5%8A%A0%E5%85%A5%E7%B9%81%E9%AB%94%E5%AD%97%E8%A7%B8%E7%99%BC%E8%BF%B4%E9%9F%BF	日本政府发言人、内阁官房长官松野博一周一证实，首相岸田文雄今年针的春节贺词，除了使用中国内地的简体字外，还首度使用繁体字及英文。松野被记者问到此举是否有制衡中国之意时说，“（这次的贺词）重视了欢庆春节人们的多元性，在台湾等地引发了很大回响”、“将持续进行这种有效果的对外宣传”。春节贺词是一月二十八日在首相官邸官网公布，使用的称谓是“谨向在日本生活工作的华侨华人、全球各地喜迎春节的所有朋友”，未提及中国。日本政府过去的春节贺词，使用的是主要在中国内地使用的简体字，这次是首度使用在台湾及香港等地使用的繁体字及英文。综合报道	2022-02-08	星岛日报	国际		264
从小学繁体字赴台短期交流	https://stepaper.stheadline.com/article/131983133132170/%E6%95%99%E8%82%B2-%E5%BE%9E%E5%B0%8F%E5%AD%B8%E7%B9%81%E9%AB%94%E5%AD%97%E8%B5%B4%E5%8F%B0%E7%9F%AD%E6%9C%9F%E4%BA%A4%E6%B5%81	汉基国际学校小学部为了培养学生的中、英双语能力，校方在编写课程时间表时，把中、英文科的课时调整至相若比例。此外，中文科采用繁体字，好让学生从小学习传统的中国文字。汉基国际学校小学部校长高安（Anne Gardon）表示，该校的小学课程还包括数学、常识、艺术、音乐和体育科，期望学生在学术以外，亦可发展体艺等方面的潜能。 双班主任制 探究式混教 另外，该校为了融合中、英双语教育，小学部采取双班主任制，两位班主任分别在中、英文达母语水平，帮助不同背景的学生学习中、英文。 该校亦推行探究式综合教学计划，中、英文科老师会共同备课，并加入合作教学环节，帮助学生更好地学好中、英文。 除了日常课堂，该校的小学生更有机会到外地参加短期交流活动。高安指，过往校方曾安排学生到台湾游学，让学生了解其他中华地区的文化，“因为年纪问题，小学生只可进行短时间的交流活动。不过，过程中亦可培养学生的独立性，这有助他们升中…	2022-02-10	星岛日报	教育		485
纪念港九大队成立80周年 《港九大队志》和《港九独立大队史》繁体字版在书展发售 17:53	http://www.hkcd.com/hkcdweb/content/2022/07/20/content_1355716.html	港九大队是中国共产党领导的抗日游击队，是香港沦陷期间唯一一支成建制、由始至终坚持抵抗的抗日武装力量。纪念港九大队成立80周年，《港九大队志》和《港九独立大队史》繁体字版等两本新书现正在香港书展发售。这两本书的出版得到爱国团体香港广州社团总会的大力支持。 《港九大队志》是香港第一本军事志，也是迄今爲止有关港九大队历史最详尽的学术着作，由刘智鹏、刘蜀永两位香港史专家主持编修，香港商务印书馆出版。编修《港九大队志》最大的困难是缺乏档案资料。文字档案缺乏，图片资料的缺乏更为严重。为确保志书的质素，两位教授及其工作团队做了大量细致、深入的研究工作。他们认真研读港九大队大队部的军事报告，与英文档案、英文书籍对照进行比较研究，同时多次前往新界乡村、山林实地调查，历时四年多方完成编修工作。书中记载了港九大队大大小小61次战斗（陆战47次，海战14次），为128位老战士或与港九大队有关的乡民立传，记述了3…	2022-07-20	香港商报	即时港闻		793
解放军特战旅演练公开 场地屡现繁体字 17:00	https://hk.on.cc/hk/bkn/cnt/cnnews/20220824/bkn-20220824170048931-0824_00952_001.html	内媒周三（24日）报道，解放军陆军第73集团军某特战旅近日进行“房间突入”课目演练。公开片段显示，场地内随处可见繁体字，据指该特战旅驻守在东南沿海。消息一出，网民立即对台海军事行动议论纷纷。 公开画面显示，一组解放军特种兵小队正在执行进入室内的演练，士兵模拟踹门而入突进“办公室”和“储藏室”等地方，而这类被突入场所的门上贴上的都是繁体字。由于进行演练的队伍为驻守东南沿海的部队，网民纷纷猜测这是为了让士兵熟悉实战地的交通标志和习惯繁体字的氛围，确保以后参与突击行动流畅顺利。 根据以往官媒曝光的影片，这并非在解放军训练场合首次出现繁体字。之前在一期关于解放军某空降兵的专业蓝军训练场所中，作为蓝军的办公室就曾出现过繁体字的标语。	2022-08-24	东方日报	即时两岸		331
台海心战 无人机摄金门岗哨照热传解放军特种兵模拟突击繁体字场所	https://www1.hkej.com/dailynews/cntw/article/3226104/%E5%8F%B0%E6%B5%B7%E5%BF%83%E6%88%B0+%E7%84%A1%E4%BA%BA%E6%A9%9F%E6%94%9D%E9%87%91%E9%96%80%E5%B4%97%E5%93%A8%E7%85%A7%E7%86%B1%E5%82%B3	在因应美国众议院议长佩洛西访问台湾而举行环台军演震慑後，大陆对台持续实施“心战”，互联网热传金门岗哨台兵一脸错愕望天的清晰照片，以及台兵向拍摄他们的无人机投掷石块的短片；同时，央视播放解放军特种兵模拟室内突击影片，“敌军”有关场所出现繁体字。台军呼吁民众，切勿受敌对台湾认知作战影响，分化军民团结。 宝岛吁军民团结勿受分化 大陆社交媒体近期疯传一张照片，据称是解放军无人机拍摄金门岗哨，哨兵的装备及表情都清晰可见。由於正值金门炮战64周年之际，有关情形引起大陆网民群起嘲笑讥讽，台湾网友亦有各种议论。 台湾陆军金门防衞指挥部昨证实有关照片属实，表示事发16日傍晚，大胆守备队发现一架民用型无人机侵扰，强调无人机当时在高空以长距变焦镜头拍摄金门大胆防区，经当值官兵示警和休息官兵自发投掷石头後飞离。惟短片显示，台兵掷石几乎击中无人机镜头，显然只在数十米高的低空飞行。 金门防衞指挥部又强调，大陆无人机…	2022-08-25	信报	两岸消息		1043
学校牌匾写繁体字 武汉民众投诉	https://orientaldaily.on.cc/content/兩岸國際/odn-20220909-0909_00178_028/學校牌匾寫繁體字--武漢民眾投訴?sort2=兩岸	【本报综合报道】湖北省武汉市一名途人近日投诉“湖北省武昌实验小学临空港分校”的牌匾以繁体字书写，质疑连自己都不认识该繁体字，更遑论普通小学生。涉事小学回应指，因为湖北省武昌实验小学重视书法教育，故各个分校都是用毛体（毛泽东书法）书写这块繁体校名。 校方指为毛泽东书法 不违法规 内媒周三报道，本应是简体字“实验小学”的牌匾，却被写成“实验小学”。有当地市民表示，“实验”二字难以辨认，要看到整个校名才知其意思。亦有人指牌匾用简体字写会比较好，至少大家都看得懂，符合大众的认知和习惯。 《国家通用语言文字法》规定，下面6个地方可以使用繁体字和异体字，包括文物古迹、姓氏中的异体字、书法篆刻等艺术作品、题词和招牌的手书字、出版、教学、研究中需要使用的，以及经国务院有关部门批准的特殊情况。	2022-09-09	东方日报	两岸		366
小学校名用繁体字 孩子看不憧惹议 20:08	https://hk.on.cc/hk/bkn/cnt/cnnews/20220908/bkn-20220908200858286-0908_00952_001.html	湖北省武汉市一名途人近日投诉“湖北省武昌实验小学临空港分校”的牌匾以繁体字书写，质疑连自己都不认识该繁体字，更遑论普通小学生。涉事小学回应指，因为湖北省武昌实验小学重视书法教育，故各个分校都是用毛体（毛泽东书法）书写这块繁体校名。 内媒周三（7日）报道，本应是简体字“实验小学”的牌匾，却被写成“实验小学”。有当地市民表示，“实验”二字难以辨认，要看到整个校名才知其意思。亦有人指牌匾用简体字写会比较好，至少大家都看得懂，符合大众的认知和习惯。 《国家通用语言文字法》规定，下面6个地方可以使用繁体字和异体字，包括文物古迹、姓氏中的异体字、书法篆刻等艺术作品、题词和招牌的手书字、出版、教学、研究中需要使用的，以及经国务院有关部门批准的特殊情况。	2022-09-08	东方日报	即时两岸		339
【粤语讲呢啲】生活上的“正体字”和“异体字”（1）	https://www.wenweipo.com/a/202212/20/AP63a0cbabe4b0e80f811aeede.html	梁振辉 香港资深出版人 执笔时，四年一度的“世界盃”已进入决赛阶段。冠军谁属？阿根廷还是法国，已有分晓。“盃”当然可写作“杯”，可历来香港各大传媒都以“盃”代“杯”，连带一些较大型的国际体育赛事，如：“英国足总盃”、“亚洲冠军球会盃”，甚至“香港回归盃”，都一律用上“盃”这个字形。 “恒生银行”是一家於1933年在香港成立的华资银行。“恒香老饼家”是香港一间位於新界元朗的传统中式饼家，成立於1920年。曾经有人经过时口讲指画，说是那一家应跟随另一家中“恒”的字形，又或当中有人写错别字。 “香港专业教育学院”（沙田分校）以及“香港专业教育学院”（李惠利分校）均由香港教育局直辖统办，为何前者用上“教”这个字形，后者却用上不同写法的“教”字，令人费解。 同为电视台，为何“无綫”和“有线”用上不同的“线”。社会上一般都认为“线”才是“正写”或所谓“正体字”，但是大型公营机构如港铁（MTR）涉及“…	2022-12-20 00:00:00	文汇报	副刊		1085
【粤语讲呢啲】生活上的“正体字”和“异体字”（2）：有鈎陈 Vs 无鈎陈	https://www.wenweipo.com/a/202212/27/AP63aa050ae4b0dff952a84e10.html	梁振辉 香港资深出版人 就图片中嘅补习姐姐同陈仔嘅一段对白内容，你可能曾经有过类似嘅遭遇，而呢个遭遇亦带出咗一个令人非常苦恼嘅问题： 乜呢个字唔系咁写嘅咩？ 亦即系话，你写紧嗰个唔系官方公布嘅“正体字”（标准字、印刷字）而系“异体字”。 “陈”有陈旧嘅意思，超市有得卖嘅老“陈醋”个“陈”字一般都系有“鈎”嘅。 讲到食烧鹅，香港人会推荐你去深井“裕记”或者“陈记”呢两间驰名中外嘅烧鹅专门店。“陈记”个“陈”字有“鈎”系意料中事喇！睇真啲，只鹅隔篱个“陈”字系冇“鈎”（口架）喎，搞咩呀？ 一讲到姓“陈”，近代会谂起中国新文化运动其中一个始创人“陈独秀”。喺佢嗰本晚年着作选，题字就用咗有“鈎”嗰个“陈”；由佢主撰嘅《新青年》，“陈”嘅印刷字都用咗有“鈎”嗰款。 咁嘅环境，你估“陈氏宗亲总会”畀唔畀到啲坚料吖嗱？第23届联席会议嗰阵，“陈氏宗亲总会”个“陈”用咗有“鈎”嗰款；但系第24届联席会议…	2022-12-27 00:00:00	文汇报	副刊		1131
海报现红领巾用繁体字“三只松鼠”涉违法	https://stepaper.stheadline.com/article/241643133121565/%E4%B8%AD%E5%9C%8B-%E6%B5%B7%E5%A0%B1%E7%8F%BE%E7%B4%85%E9%A0%98%E5%B7%BE%E7%94%A8%E7%B9%81%E9%AB%94%E5%AD%97-%E4%B8%89%E9%9A%BB%E6%9D%BE%E9%BC%A0-%E6%B6%89%E9%81%95%E6%B3%95	内地零食品牌“三只松鼠”风波不断！继早前被爆二○一九年一组海报的模特妆容“辱华”，日前又被揭发同年发布的另一组广告中，使用“少先队员”、“红领巾”等标识，还在宣传标语中使用繁体字，被指违法。三只松鼠昨午道歉，并将微信公众号上的相关海报删除。 有网民日前在微博爆料三只松鼠二○一九年发布的一组“补脑节”广告图，上面两人戴着红领巾，疑似扮成少先队员，其中一人行少先队礼，另一人抱着“五年防骗，三年补脑”的零食大礼包。海报下方用繁体字写着“争取脑力大飞跃，要把防骗记心中”，“改革春风吹满地，多吃五三没毛病”。 据称，该广告在二○一九年愚人节前夕发布。三只松鼠与网易新闻推出三月三十一日“补脑节”，通过打造戳中“九五后”考试回忆的《五年高考三年仿真》趣味产品包装，对症“补脑”。 网民：三只松鼠需补脑 对此，有网民调侃，“看来三只松鼠真的需要补一补自己的脑子了。”还有法院指出，其在商业广告中使用红领巾，…	2022-01-04	星岛日报	中国		665
Juicy叮｜港女淘利是封姓“范”变姓“范”店家死撑：是繁体字21:16	https://hd.stheadline.com/news/realtime/hk/2299095/即時-港聞-Juicy叮-港女淘利是封姓-范-變姓-範-店家死撐-是繁體字?	网上购物虽然方便，但有时候中港两地用字有别，也会闹出购物“中伏”无奈苦况。一名港女日前在网上订购百家姓利是封，店方却将姓氏的“范”自行繁体化，事主还要折腾一番方获退款解决争议。 事主在“淘宝唔开心share”社交群组发文，指自己日前在一网店订造印上姓氏的利是封，但到收货後才发现出事：店方将事主要求的“范”姓，自行繁体化印成了“范”姓，使得事主大叹无言：“印『范』姓利是封都出事。” 然而，当事主联终店家要求跟进及退款，并指事前已指明姓“范”而不是“范”，对方却称“范”是“范”的繁体字，不认为有错，拒绝退款请求：“亲亲，范的繁体字是这个啊”更转载内地搜寻平台结果，试图证明没有出错。 事主指店方经过一番争论，仍不愿解决与跟进问题，最後只能要求网购平台直接介入，最终获得退款处理。 帖文发表後网民都议论纷纷，有人趁机诉苦说订购姓氏利是封，同样“被繁体”了：“我买个『余』字利是封，讲明余文乐的余，它…	2022-01-15	头条日报	即时港闻		614

## Sheet: 普通话
title	url	content	date	from	in	by	words
教师基准试 普通话达标率升	http://paper.hket.com/article/1868601	【本报讯】考评局昨公布最新教师语文能力评核（基准试）报告，普通话达标考生整体上升，去年只有3成人达标的卷一聆听与认辨，今年有近6成人达标。 英文科却跌 写作5年来最差 不过，英文科基准试成绩整体下跌，其中写作卷达标率更不足4成，是5年来最低。 今年普通话考生有1,954人，普通话科卷一聆听与认辨及卷二拼音表现较逊色，达标人数分别是59.8%及55.2%。 报告指，在聆听辨误方面，不少人未能识别“这么夸张地减肥”等都是不符合普通话规范的说法（见表）。 理工大学中文及双语系导师李卉博士表示，“这么夸张地减肥”是港式中文，普通话应说成“减肥减得太过分”。她提醒，普通话是以北京语音为标准音、北方方言为基础方言。 另外，有考生在普通话卷一听辨词语部分，将“嫡子”误作“笛子”；在卷二拼音卷的根据拼音写汉字，考生把将“深邃”误写为“神髓”等。语音方面，报告指有考生把不必翘舌音节读成翘舌音，例如“嘴”、…	2017-07-29	经济日报	港闻		567
基准试英文写作仅39%考生达标普通话听辨部分略逊“嫡子”“笛子”不分	http://stepaper.stheadline.com/news_content.asp?newsid=A04009.txt&newscat=A1&newsdate=2017-07-29	教师语文能力评核（基准试）报告昨公布，英文写作卷的达标率大跌一成至三成九。考生需撰写辩论讲辞，但报告指，部分考生理据薄弱，陈述空洞；该卷又要求考生改正及解释文句问题，有考生未察觉片语“keep his word”（信守诺言）的“word”需为单数。普通话基准试所有分卷的达标率均有提升，但个别听辨词语题目，考生表现略逊，如将“嫡子”误听为“笛子”。 今年有一千四百七十一人应考英文基准试，写作卷达标率明显下跌，由去年的五成，下滑至今年三成九。考评局昨发放的基准试报告，披露考生常见错误（见附表）。写作卷以《香港是性别公平的社会》（Hong Kong is a gender-fair society）为题，要求考生撰写辩论讲辞，可选择赞成或反对一方，并需提出至少两个理由支持立场。 写作时直接翻译广东话 报告指，部分考生写作时直接翻译广东话，亦有语法问题。有考生举证时，未能提出有力的理据强化论点；…	2017-07-29	星岛日报	港闻		1199
监誓人．普通话	http://premium.mingpao.com/cfm/Content_Column.cfm?Channel=vy007&Path=235795822017/vy007.cfm	【明报文章】数月前谈过，立法会议员宣誓出问题，监誓人也有责任。现在想来，监誓人和立法会主席接纳不合标准的宣誓方式，其实严重失责。而且过去多次“纵容”宣誓者出蛊惑，促成这次变本加厉。当时还被接纳，直至中央发恶，才取消议员资格还追讨巨额讼费，他们是否可以要求监誓人和主席赔偿损失呢？ 如果早就依足规矩，凡出轨都不接纳，根本不会发生这场闹剧。可见监誓惯于马虎随便，得过且过，不符法治基本要求。 此外，想到香港回归后另一种宣誓笑话，就是中央委任的特区局长们用普通话宣誓，准确流利的不多，常会口齿不灵，出丑惹笑。这类情况是否同样不合标准，要取消资格呢？显然不会，因为多数香港人不擅长普通话，“唔啱音”无伤大雅。 那么，可以用粤语或英语宣誓吗？似乎不少人认为，宣誓接受中央委任，应该用中华人民共和国“官式”语言，才算效忠。我认为大致上合理，但应容许例外。因为会说普通话并非作为中国公民的必要条件。中国各地汉族方…	2017-07-29	明报	作家专栏	石琪	599
操普通话4岁男童独行管制站 警寻其父母 (00:39)	http://m.on.cc/nc/hknews/20170728/20170728003956lc.html	【on.cc东网专讯】落马洲支线管制站一名44岁女职员，昨日下午2时，发现一名年约4至5岁男童，独自在管制站徘徊，于是报案，警员接报到场，将男童送往北区医院检查。案件暂列对所看管儿童或少年人虐待或忽略，交边界警区刑事调查队第二队跟进。 该名男童姓廖，年约4至5岁，操普通话，身高约一米，瘦身材，圆面型，被发现时身穿一套白色长袖上衣、白色长裤及蓝色拖鞋。	2017-07-28	东方日报	即时港闻		189
操普通话男童落马洲管制站徘徊	http://www.stheadline.com/inews-content.php?cat=a&nid=153394	一名年约四至五岁姓廖男童昨午两时在落马洲支线管制站独自徘徊，入境处职员发现报警。警员接报到场，将他送往北区医院检查。案件暂列对所看管儿童或少年人虐待或忽略处理，交边界警区刑事调查队第二队跟进。 男童操普通话，身高约一米，瘦身材，圆面型，被发现时身穿一套白色长袖上衣、白色长裤及蓝色拖鞋。 警方呼吁任何就案件有资料提供的市民，尽快与任何一间警署联络，或致电36614400或3661 4052与调查人员联络。	2017-07-28	头条日报	即时港闻		227
操普通话男童落马洲管制站徘徊 07:47	http://std.stheadline.com/instant/articles/detail/467326-%E9%A6%99%E6%B8%AF-%E6%93%8D%E6%99%AE%E9%80%9A%E8%A9%B1%E7%94%B7%E7%AB%A5%E8%90%BD%E9%A6%AC%E6%B4%B2%E7%AE%A1%E5%88%B6%E7%AB%99%E5%BE%98%E5%BE%8A	一名年约四至五岁姓廖男童昨午两时在落马洲支线管制站独自徘徊，入境处职员发现报警。警员接报到场，将他送往北区医院检查。案件暂列对所看管儿童或少年人虐待或忽略处理，交边界警区刑事调查队第二队跟进。 男童操普通话，身高约一米，瘦身材，圆面型，被发现时身穿一套白色长袖上衣、白色长裤及蓝色拖鞋。 警方呼吁任何就案件有资料提供的市民，尽快与任何一间警署联络，或致电36614400或3661 4052与调查人员联络。	2017-07-28	星岛日报	即时香港		227
巴黎名店销售员：懂说普通话 薪金较高	http://premium.mingpao.com/cfm/Content_News.cfm?Channel=ea&Path=67370241542/eca3.cfm	【明报专讯】据策略顾问公司Bain&Company发表报告，中国地区销售去年占全球奢侈品市场约三成。为迎合中国客的购买力，近年不少国际品牌招聘精通外语的中国籍销售员。一名于巴黎名牌专门店任职达5年、不愿透露姓名的当地销售员向记者透露，懂得说普通话的销售员，底薪及佣金都比本地人高，她估计目前当地任职名店销售员的中国人占整体数目近一半。 料近半销售员为中国籍 虽然“同工不同酬”，但该名销售员没有感到不忿，并视为名店销售员的优势，“能说普通话在法国有很多优势，他们（中国销售员）可以招待不懂说英文的中国客，因为他们懂得普通话，不论底薪或佣金，都比我们（本地销售员）还要多”，她身边有不少中国籍销售员，自己却只懂一句半句普通话，“对我来说，这不是一个问题，但这让我感受到中国客对名牌的重要性，若没有中国客，我相信我们店会流失超过一半的生意额”。 上半年开云亚太区收入增37% 据奢侈品龙头LVMH今年首…	2017-07-31	明报	经济		584
政助“女状元”是《星岛》辩论冠军中学已睇中央台学普通话	http://stepaper.stheadline.com/news_content.asp?newsid=A20057.txt&newscat=A1&newsdate=2017-08-03	政府首批副局长及政治助理日前正式亮相，名单上有六名女性，满足特首林郑月娥希望更多女性加入问责团队的要求，另外新成员平均学历高，多人拥硕士及博士学位，并有最少两名会考状元。 首批政治助理中，包括三位年轻叻女，其中会考十优状元杨宝莲就加入财库局，中学时参加过《星岛日报》举办的校际辩论比赛，勇夺英文组冠军，原来她的普通话亦好流利，读书时宁愿放弃睇《流星花园》，以免学台湾发音，而拣睇中央台的节目。 现年三十一岁的杨宝莲，学业威水史多箩箩，除了是○三年会考唯一一个文科十优状元外，仲精通中、英、日、韩文！杨宝莲中学母校是拔萃女书院，中四时代表学校出战《星岛日报》举办的“第十七届校际辩论比赛”，担任第二副辩，勇夺英文组冠军！她的普通话讲得好流利，曾经自爆中学时为怕学了唔纯正的台湾发音，而放弃睇当年红遍港台的《流星花园》，改睇中央电视台节目及内地剧！ 创科局政助张曼莉今年二十八岁，年纪轻轻获委任，居然令…	2017-08-03	星岛日报	维港会	卢骏	598
过来人罗意庭﹕先学好普通话	http://premium.mingpao.com/cfm/Content_News.cfm?Channel=sp&Path=168426205055/spb2.cfm	【明报专讯】早在2002年起，香港飞龙带着本地球员吕楚威及虞兴海，北上征战CBA，此后亦有潘志豪及罗意庭登陆国内篮坛。Duncan成为香港第5名CBA球员，过来人阿庭笑言，这混血队友首要适应更高训练强度，其次便是要学好普通话，融入球队。 阿庭在2010年加盟福建浔兴，属首名真正投效内地CBA球队的香港球员。前年他结束合约返港，今季见证队友惠龙儿圆梦，不忘为他送上锦囊：“CBA每周只有一天半休息，跑动及体能付出均较多，Duncan身心都要好好准备。球季在10月展开，现时已度过最艰辛的体能训练，预料Duncan报到时会较着重战术部署。” Duncan虽在港土生土长，但为香港及澳洲混血儿，阿庭亦笑言，普通话是队友另一难题：“篮球层面上，Duncan可以逐步适应，但目前先要学好普通话，届时与队友好好沟通。”	2017-08-03	明报	体育		378
操普通话男童疑被内地母亲遗弃落马洲管制站 16:50	https://topick.hket.com/article/1868159/	一名年约4至5岁、操普通话的姓廖男童昨午2时被职员发现独自在落马洲支线管制站徘徊，管制站保安员报警，将男童送北区医院检查，案件暂列作“对所看管儿童或少年人虐待或忽略”处理，交由边界警区刑事调查队第2队跟进。 警方翻查闭路电视，相信男童是由其母带入境，然后便离港返回内地，而男童父亲相信是香港人。 男童操普通话，身高约1米，瘦身材，圆面型，被发现时身穿一套白色长袖上衣、白色长裤及蓝色拖鞋。 警方呼吁任何就案件有资料提供的市民，尽快与任何一间警署联络，或致电3661 4400或3661 4052与调查人员联络。	2017-07-28	经济日报	即时社会		290
普通话基准试考起教师 聆听辨误4成不达标 16:34	https://topick.hket.com/article/1868089/	考评局今日(28日)公布最新教师语文能力评核（基准试）报告，普通话达标考生整体上升，去年只有3成人达标的“死亡之卷”卷一聆听与认辨，今年有近6成人达标，但在聆听辨误方面，不少人未能识别“老板没架子，他特好人”、“这么夸张地减肥，我才不干呢”、“房价到了这种环境”等，都是不符合普通话规范的说法。 报告又提到，考生反而错将一些合符普通话规范的说法，判为错误，例如“就喝水对付对付嘛”、“没咱打工的甚么事儿”等。 报告指，由此可见，要学好普通话，除了语音外，言语的实际运用也不可忽略。 据规定，参加语文能力评核的考生，须全部考卷达3级或以上，才达到语文能力要求而可任教相关科目。今年普通话考生有1,954人，普通话科卷一聆听与认辨及卷二拼音表现较逊色，达标人数分别是59.8%及55.2%。 有考生在普通话卷一听辨词语部分，将“嫡子”(dí zi) 误作“笛子”(dí zi)，又把“筹措”(chóu …	2017-07-28	经济日报	即时社会		927
政助“女状元”为《星岛》辩论冠军 中学已睇中央台学普通话	http://www.stheadline.com/inews-content.php?cat=a&nid=158517	政府首批副局长及政治助理日前正式亮相，名单上有六名女性，满足特首林郑月娥希望更多女性加入问责团队的要求，另外新成员平均学历高，多人拥硕士及博士学位，并有最少两名会考状元。 《星岛日报》报道，现年三十一岁的杨宝莲，除了是○三年会考唯一一个文科十优状元外，亦精通中、英、日、韩文。杨宝莲中学母校是拔萃女书院，中四时代表学校出战《星岛日报》举办的“第十七届校际辩论比赛”，担任第二副辩，勇夺英文组冠军。她的普通话讲得好流利，曾经自爆中学时为怕学了唔纯正的台湾发音，而放弃睇当年红遍港台的《流星花园》，改睇中央电视台节目及内地剧。 创科局政助张曼莉今年二十八岁，竟令前食卫局政助陈智远感触，事源○八年政府委任二十八岁的陈智远做政助时，引起质疑，但今次张曼莉似乎顺利过渡，陈智远就在社交平台说笑，指候任的年轻政助应该请他食饭。至于商经局政助、现年二十九岁的冯海容，目前正处理放弃外国护照事宜，准备九月上班。 …	2017-08-03	头条日报	即时港闻		454
【民主党员被掳】林子健称昨天旺角被掳 歹徒操普通话 记者会展示伤痕 11:28	http://news.mingpao.com/ins/instantnews/web_tc/article/20170811/s00001/1502420661565	民主党开记者会，党员林子健称昨日下午4时许在旺角砵兰街被疑似内地执法人员掳走禁锢及殴打恐吓事件。 民主党李柱铭、何俊仁、林卓廷、李卓人等人陪同事主林子健现身并展示伤势。林子健指日前被恐吓不能将球星美斯赠予刘晓波的球衣交予刘皂遗孀刘霞，否则后果自负，他没理会。 林子健说，昨日在旺角被人强行带上车，对方操普通话。他被对方殴打，更被人以钉书机在双脚上钉了十几口。	2017-08-11	明报	即时港闻		203
【民主党员被掳】新同盟：从没介绍操普通话内地人员 16:11	http://news.mingpao.com/ins/instantnews/web_tc/article/20170811/s00001/1502438984639	民主党林子健声称被疑似内地执法人员掳走禁锢及殴打事件，今早在记者会他提到，事前收到内地人员电话，该人是当时民主党少壮派介绍他认识。 外界有估计林子健所指的“少壮派”是指2010年民主党改革派成员，他们当年退党后成立新民主同盟。明报记者今向成员之一的陆耀文查询，但陆强调他们没有介绍过操普通话的内地人员给林子健认识，而为免以讹传讹，他希望林子健提出证据，是谁介绍这内地人员给他认识，“还是他自己本身已识了一些内地人，请不要推卸在其他人身上”。 被掳后钉书钉大腿 林子健：粒钉系警告全港市民，不只是我 林子健今早在记者会称在3日前，他收到过往他任民主党中委时接触的内地人员电话，对方讲普通话，而他是当时民主党少壮派介绍他认识，间中亦会食饭。但他没有说明少壮派的身份。 2006年民主党发生“真兄弟事件”，当年党内领导层称民主党已被中共渗透，矛头直指向党内的改革派，包括范国威、陆耀文、关永业、任启邦等人…	2017-08-11	明报	即时港闻		621
林子健被操普通话人士掳走 警称闭路电视无影到疑人 21:14	https://topick.hket.com/article/1878735/	民主党今早召开记者会，指党员林子健称昨日下午4时许在旺角砵兰街被疑似内地执法人员掳走禁锢及殴打恐吓，他展示肚皮及大腿的伤势，两边大腿呈多个“十字型”的被钉过的伤痕，部份伤口留有钉书钉，警方西九龙总区重案组接手调查。据了解，警方已翻看案发球衣店一带的闭路电视片段，惟未见拍摄到可疑人物出现。警方会继续调查，并循非法禁锢案处理。 林子健早前获得巴塞球星美斯签名，准备转赠给诺贝尔和平奖得主刘晓波太太刘霞。他称，3日前接到电话，警告他不要将美斯的签名转交刘晓波的太太刘霞，否则后果严重。林子健没理会。 林指，昨日下午4时，他在油尖旺砵兰街一间球衣店买球衣，被两名说普通话男子掳走，其后闻了一些东西失去知觉。 林子健其后被打及醒来，发现只剩底裤，对方质疑他是否认识刘霞、为何这么多事？其后有人在他大腿钉上十字超过20次，林子健痛得大叫，其后再被弄晕，醒来时发现自己被弃置在海滩上，其后才知道自己身处西贡一带…	2017-08-11	经济日报	即时社会		684
林子健抵警署报到 突用普通话答记者提问	http://www.singpao.com.hk/index.php?fi=news1&id=43224	【林子健案】 【本报港闻部报道】民主党成员林子健声称在旺角被掳、之后涉误导警务人员罪而被检控，他获准保释后，昨天到马鞍山警署报到。他在回答记者提问时突然用上了普通话，之后又说“听到国语都惊”。 走路时左脚一拐一拐 林子健在昨天傍晚6时20分左右独自一人到马鞍山警署报到，他身穿一件蓝色球衣，走路时左脚一拐一拐，但精神不俗。他在警署逗留不足10分钟就离开，他表示身体正在康复，但律师建议不能透露其他详情，他又说：“我真的很想讲，但真的甚么都不可以讲。”对于事发后民主党是否继续与他保持联络，他表示民主党的人很好，有与他保持联络、关心他。 林子健受访后准备离去，记者问他要去哪里，他突然以普通话回答“当然是回家啦”，随即又称现在听到普通话都惊，之后就挥手微笑离去。 民主党立法会议员林卓廷昨天稍早时表示，林子健被控以误导警务人员罪保释后，只透过电话短讯问候，未有与对方见面。他表示，林子健家人回覆说，林…	2017-08-22	成报	要闻港闻		489
林子健警署报到 突讲普通话	http://orientaldaily.on.cc/cnt/news/20170822/00176_026.html	【本报讯】报称于油麻地被掳走的民主党成员林子健，早前被控涉嫌误导警务人员罪，上周四（17日）到法庭应讯后获准保释，昨日傍晚约六时二十分到马鞍山警署报到，逗留约十分钟后离去。林子健离开时被问及将前往甚么地方时，突然转用普通话回答“当然是回家喇！”惟他接着又称：“听到国语都惊！” 早前曾因身体不适留院的林子健自称正在康复中，但律师建议不能透露其他详情：“我真系好想讲，但真系咩都唔讲得。”被问及民主党有否与他联络，他则称“佢哋好好。” 林子健的党友，立法会议员林卓廷昨出席另一活动时，没有正面回应是否仍然相信林子健的说法。对于有人质疑民主党内有多名律师，为何林子健仍要申请法援署当值律师计划，民主党中常委蔡耀昌回应指，据他了解，林子健有权利申请当值律师计划。	2017-08-22	东方日报	港闻		352
林子健：听到普通话都惊	http://premium.mingpao.com/cfm/Content_News.cfm?Channel=gb&Path=101055818223/gbj1.cfm	【明报专讯】民主党成员林子健早前因声称被内地人员掳走虐待，经调查后涉嫌误导警务人员被捕，获准保释但不得离港，案件押后至下月14日再提讯。林子健昨日到警署报到，指身体仍在康复，并说现在“听到普通话都惊”。 昨晚6时许，身穿蓝色波衫的林子健独自到马鞍山警署报到，精神不俗，在警署内逗留约5分钟后离去。他向记者表示想说的话很多，但好多都不可以说，例如是否需要覆诊也不能说，并做出封嘴的手势，又做出OK手势表示其身体仍在康复中。对于民主党是否继续与他联络，他说：“他们都很好。”林准备离去时，记者问他到哪里，他以普通话回答“当然是回家啦”，随即又说现在“听到普通话都惊”。 林子健8月11日召开记者会，声称在旺角被掳走虐待，并被人在大腿用钉书机钉上“十字架”形的21口钉。警方重案组调查后，以涉嫌误导警务人员拘捕林，指他今年8月11日在玛丽医院内明知地提供虚假资料，即声称于8月10日下午在油麻地砵兰街与碧…	2017-08-22	明报	港闻		441
林子健案：警署报到10分钟 林突说普通话 (20:21)	http://m.on.cc/nc/hknews/20170821/20170821202119lc.html	【on.cc东网专讯】民主党成员林子建早前声称被掳虐待，及后涉嫌误导警务人员罪而被检控，上周四(17日)到法庭应讯及获准保释后，今日(21日)傍晚约6时20分独自到马鞍山警署报到，逗留不足10分钟离去。临走时被问及现在前往甚么地方，林子健突然转用普通话回答：“当然是回家喇！”但又接着说：“听到国语都惊！” 林子健自言身体正在康复中，但律师建议不能透露其他详情，他又说：“我真系好想讲，但真系咩都唔讲得。”被问及民主党有否与他联络，他只说：“佢哋好好。” 有关林子健涉误导警务人员罪的案件将于下月14日再讯。该党立法会议员林卓廷今日透露，林子健已向法援署申请服务。对于有人质疑民主党内有多名律师，为何林子健仍申请法援署当值律师计划，该党中常委蔡耀昌回应表示，据他了解，林子健有权利申请当值律师计划，不清楚其他方面的事。 被问到是否仍相信林子健时，林卓廷没正面回应，只说现时只有传媒报道，未见有其他证…	2017-08-21	东方日报	即时港闻		451
【国歌法】称港人普通话参差“唱歪音”易触条例 田北辰：须视乎意图 09:44	http://news.mingpao.com/ins/instantnews/web_tc/article/20170831/s00001/1504142315301	特首林郑月娥日前表明，内地《国歌法》纳入《基本法》附件三后，会以本地立法形式实施。港区全国人大代表、立法会议员田北辰，认为条例中“庄重、尊重”字眼有不同诠释空间，应在本地立法阶段在立法会仔细商讨。 田北辰今早接受港台访问时指，《国歌法》条例中“庄重、尊重”字眼有不同诠释空间，应在本地立法阶段在立法会商讨。他举例指，部分港人的普通话差，发音时不标准“唱歪音”，他认为一旦不慎违反规定，亦要视乎意图是否侮辱国歌。田北辰笑称：“今时今日立法会议员宣誓，若逼住讲普通话，就大把新闻”。 田北辰认为，某些行为是否违法很难判断，他又认为很难分辨有人实质行为违反规定时，原意是否是侮辱国歌。至于应否进行公众咨询，田北辰应该无必要，在立法会咨询即可，由立法会为条例订立清晰规范。	2017-08-31	明报	即时港闻		356
【国歌法】普通话唔正？ 叶刘：我都系用广东话唱 “细细个屋企应教唱” 09:23	http://news.mingpao.com/ins/instantnews/web_tc/article/20170902/s00001/1504313997893	全国人大常委会通过《国歌法》，10月1日生效，并将纳入港澳《基本法》附件三，两个特区应在当地立法实施。行政会议成员、新民党主席叶刘淑仪早上出席商台节目时，被问到有人忧虑会因普通话读音不正惹来问题，但她笑言“我都系用广东话唱，喺香港”。 至于中、小学是否应把国歌作为爱国主义教育重要内容，叶刘淑仪认为应在教育课程推行，又说“细细个屋企应该教你唱国歌啦”。她认为这部分毋须立法，“应该自自然然人人做”。 叶刘淑仪提到，立法时一定会出现争拗，如被指影响言论及创作自由等，相信只要有合理理由，政府都会聆听采纳。	2017-09-02	明报	即时港闻		275
教大城大现港独标语 普通话女生与保安拆除 (13:06)	http://m.on.cc/nc/hknews/20170906/20170906130640lc.html	【on.cc东网专讯】香港中文大学本周一(4日)在校内出现“香港独立”字眼的横额及海报，其后香港大学、教育大学及城市大学的校内民主墙亦相继出现港独横额，称要支持坚持不拆除港独横额的中大学生会。其中教大及城大分别有操普通话女学生及保安出手拆除港独标语，两校学生会称有关行为是破坏言论自由。 教大学生会在Facebook表示，校内中央广场一幅写有“香港独立”的横额挂上不足半小时，即被操普通话女学生扯烂横额绳索及黑布，学生会成员上前阻止，该女学生立刻离去。学生会谴责该女学生行为，称不能因立场有异而破坏他人物品，形容是“蛮夷之为”，称要捍卫自由。 城大学生会Facebook专页称，民主墙上的港独标语被保安撕走，保安称未能找到标语上注明的学生姓名及编号，但学生会则称成功找到该学生，质疑保安是蒙混过关，又批评城大以思想自由为基石，但今次校方做法是倒行逆施。学生会更表示，如因“香港独立”四字而入狱，他们…	2017-09-06	东方日报	即时港闻		452
操普通话教大生民主墙贴标语 促严惩恶徒 (13:13)	http://m.on.cc/nc/hknews/20170911/20170911131319lc.html	【on.cc东网专讯】香港教育大学民主墙先后有人张贴奚落教育局副局长蔡若莲丧子标语，以及冒犯刘晓波夫妇的字句。一群操普通话、自称是教育大学的学生，今午(11日)到民主墙张贴标语字句“支持学校彻查追责”及“还我教大清誉”。 约10名学生早上11时在教大中央广场不断高叫口号：“严惩冷血恶徒。”他们指，反对学生会包庇恶徒，支持学校彻查及追究责任，并须予以严惩。他们又在场派发传单及呼吁拒绝被学生会代表的学生联署签名支持。	2017-09-11	东方日报	即时港闻		221
全港普通话教师义工联盟成立	http://paper.wenweipo.com/2017/09/16/AY1709160003.htm	（记者 子京）全港普通话教师义工联盟日前假石门富临皇宫举行成立典礼，国家教育部中国语文现代化学会语言艺术专业委员会会长李慧敏莅临主礼。刘治君荣膺首届主席，典礼当晚聚集了来自内地的语言艺术专家、香港各界代表及全港普通话教师、义工代表共400人，共同见证，场面热闹。 刘治君表示，联盟的成立将成为教师间相互交流、提升业务水平，以及协助新入职同行开展工作的平台，并在全港推广普通话及语言艺术，为香港低收入家庭提供免费教学资源，更将持续致力于国学的推广工作，让国学走进香港的课堂和家庭。 刘治君杨化容致辞 刘治君指，联盟目前约有500名会员，将以团结凝聚爱国爱港的普通话教师及香港各界义工人士，以推广普通话和语言艺术，弘扬中华经典文化为己任，扶持弱势群体，促进团结共融为宗旨，积极组织会员参加普通话义工活动，配合朗诵、讲座、探访等多种形式，开展公益教学及义演，以及探访老人院等多项公益活动。 联盟副主席兼秘…	2017-09-16	文汇报	社团新闻		693
越南员工普通话劲过港人	http://news.wenweipo.com/2017/09/12/IN1709120016.htm	【文汇网讯】 （大公报实习记者 叶文龙 越南后江省报道）在理文造纸位于越南后江省的厂房，记者发现不少当地员工都会说普通话，连系统也有中文显示。越南理文造纸总经理钟伟富介绍，目前越南厂房有约10%至15%技术专才来自内地，为更方便中越员工之间的交流，特意定期开设中文培训课程，安排越南员工学习普通话。“排班时也会分配两国员工一起工作，营造良好的中文学习环境。” 在厂房跟越南员工交流时，他们都能用普通话对答如流，从容解答学子们的疑问。有学子更笑称： “比我哋讲啲普通话仲要好。”越南理文造纸审计经理张振堂透露，为方便沟通，越来越多当地员工使用微信。可见中国科技的影响力也随着中国资金“走出去”而正在扩大。 责任编辑：乔一	2017-09-12	文汇报	即时国际		333
普通话教师 义工联盟成立	http://124.243.200.100/a.php?f=20170921/hy-3.txt	全港普通话教师义工联盟近日成立，包括内地语言艺术专家、香港各界代表及普通话教师、义工共四百多人出席盛会。在成立晚会上，表演节目包括少儿集诵《中国少年》、《华夏霓裳》、《戏曲体操》、《歌曲串烧》等，国家演播艺术家李慧敏老师以诗朗诵《中华颂》作压轴表演，她是国家教育部中国语文现代化学会语言艺术专业委员会会长。 全港普通话教师义工联盟主席刘治君在开幕礼上表示，联盟成员来自五湖四海，联盟将为香港低收入的家庭提供普通话免费教学资源。同时，联盟还将持续致力于国学的推广工作，让国学走进香港的课堂和家庭。 作为全港首个普通话教师义工组织，目前加盟的香港普通话教师约五百多人，将以普通话义工活动为主题，配合朗诵、读经活动、讲座、探访等多种形式，在全港开展公益教学及义演，协助新入职同行开展工作，探访老人院，关爱独居老人及弱势人士，支持在港社区、社团等公益活动。 该联盟今年筹备初，就开展了一系列义务活动，第一个…	2017-09-21	大公报	校园版		516
花旗银行大厦流行普通话	http://124.243.200.100/a.php?f=20170923/jj-35.txt	【大公报讯】记者李理北京报道：在香港中环甲级商厦“花园道三号”，每天上演的都是金钱永不眠的戏码，其中一个必不可少的主角名字叫“中国”。卢韦柏自己亲身感受到内地经济的力量，“在我们（办公）的大厦大堂官方语言不是广东话和英语，而是普通话，可见香港吸引了多少内地公司进来。” 卢韦柏说，他们通过培训，令许多内地同事来到香港，这些人手会被分配到一线，也可以直接服务于走到“一带一路”市场的中国企业。他称，对于那些在中国中部和西部地区的企业而言，香港是走向“一带一路”市场的最佳桥梁。 虽然人在香港，但卢韦柏十分关心两地融合，“港珠澳大桥开通后，从香港机场到珠海和到中环用的时间差不多，内地的商机再加上香港自由港以及法律、会计和金融的优势，透过香港中转到内地和海外的资本一定会越来越多。”	2017-09-23	大公报	香港经济		363
德极右女同志领袖能说普通话	http://stepaper.stheadline.com/news_content.asp?newsid=A18069.txt&newscat=A3&newsdate=2017-09-27	德国极右派另类选择党（AfD）在周日大选后成为国会第三大党，它的其中一名领袖魏尔德（Alice Weidel） 是女同志，曾在中国工作六年，能说普通话。 熟悉中国文化社会状况 魏尔德为另类选择党的数名领导之一，她拥有经济学学位及国际发展博士学位，曾受聘于高盛、安联、中国银行。她曾以银行家的身分在中国待了六年，因此能讲普通话。魏尔德懂得分辨北京腔和上海腔的差异，她接受记者 访问时，曾详述中国政府为了办好二○○八年奥运，如何为北京改头换面。 她也向记者称熟悉儒家思想如何影响现代中国社会的一切，包括八九年的民运为何失败，以至于最近一名公安局高层因贪污被判死刑的案件。 现年三十八岁的她已公开出柜，伴侣是瑞士电影制作人。但她却反对同性婚姻，曾在Twitter推文说：“在数以百万计穆斯林非法移民涌到德国之际争拗婚姻平权，是个笑话。”	2017-09-27	星岛日报	国际		411
普通话发音欠准出事？ 叶刘淑仪：在香港以广东话唱国歌	https://www.am730.com.hk/news/%E6%96%B0%E8%81%9E/%e6%99%ae%e9%80%9a%e8%a9%b1%e7%99%bc%e9%9f%b3%e6%ac%a0%e6%ba%96%e5%87%ba%e4%ba%8b%ef%bc%9f-%e8%91%89%e5%8a%89%e6%b7%91%e5%84%80%ef%bc%9a%e5%9c%a8%e9%a6%99%e6%b8%af%e4%bb%a5%e5%bb%a3%e6%9d%b1%e8%a9%b1%e5%94	行政会议成员、新民党主席叶刘淑仪称，相信《国歌法》的本地立法程序，与落实《国旗法》和《国徽法》时一样，届时会展开立法咨询，认为市民不用担心，又指保护国家尊严是应有之义。 对于有人担心因普通话发音不正而出问题，叶刘淑仪说，她在香港都是用广东话唱国歌，又认为政府毋须立法，将国歌列为爱国主义教育内容。 另外，叶刘淑仪认为，林郑月娥成立土地供应专责小组，讨论所有关于土地的矛盾，策略正确，但需打破立法的瓶颈。	2017-09-02	am730	新闻		225
学普通话的两种取向	http://skypost.ulifestyle.com.hk/article/1913872/	【晴报专栏】有个在港居住多年的外籍朋友，想大家介绍一个会说普通话的大学生给她，每星期一天来跟她的儿子玩或带他出外游玩。小男孩正读幼稚园，在学校学两种语言，一种是他的母语英语，另一种则是普通话；他在家中是用母语表达，只在学校上普通话课时学说普通话。 一朋友的两个女儿也正读这幼稚园，两个女儿的父母都是港人，母语都是广东话，但因为两个孩子在学校学的第一语言是英语，朋友在家中也多用英语与两个女儿沟通，她也找了个普通话老师给两个孩子补习普通话。 这朋友为要孩子跟外籍的孩子那样能说得一口英语像说母语般，在家中也要女儿多听多说英语而放弃母语，而为要孩子的普通话也比别人好，他们替孩子安排一个“有料”老师补习。两个朋友，在选择上有很大的分别，一个是请人跟孩子玩，一个是请人来给孩子上课。 外籍朋友是要给儿子找个能说普通话的玩伴，理想是一个正读大学的“哥哥”或“姐姐”，而港妈要找的是一个普通话老师，理想是正（…	2017-09-28	晴报	亲子/教育		460
外籍女司仪普通话流利 内地管理层受落	http://premium.mingpao.com/cfm/Content_News.cfm?Channel=ea&Path=202112708586/eak5.cfm	【明报专讯】众安在线（6060）昨日上市仪式其中一个焦点，是找来了上市委员会成员Julia Charlton（周怡菁）做司仪，她致辞时“表演”了她一口流利的普通话，祝贺众安来港上市，虽然仍带有少许外国人口音，但都令一众内地管理层非常受落。Julia Charlton正职为律师行Charltons的Principal Partner（主要合伙人），擅长合并收购、企业融资等范畴。 全体管理层弃西装 穿标语T恤 至于昨日一众众安管理层，包括大老板欧亚平都穿T恤登场，众安首席行政官陈劲昨日早上表示，自己与团队应该是破例没有以正装出席上市仪式的公司代表，更表示自己“进场时连唯一的西装外套也脱下来”，身穿“做有温度的保险”标语T恤，为此特别要感谢港交所破例包容。 另外，众安管理层原来热爱“文青”咖啡，昨日特地在尖沙嘴“% Arabica”咖啡店订购30杯咖啡，放到港交所（0388）展览厅酬宾，其中一…	2017-09-29	明报	经济		453
【超级黄金周】广东道未见人龙 五年两度来港 内地客：普通话在港更普及 16:09	http://news.mingpao.com/ins/instantnews/web_tc/article/20171001/s00001/1506844795620	内地一连8天“十一国庆”连中秋的“超级黄金周”今日开始，国家旅游局预计，全国出游人数达到7.1亿人次。有旅游业界人士表示，今年内地访港旅行团较去年增长四成至五成，料黄金周每日约有300团，酒店订房率亦达九成。有来港内地旅客认为，因汇率在港购物较便宜，但亦有人认为国内国庆折扣更多。 《明报》记者下午到尖沙嘴广东道巡视，名店外未见人龙。来自新疆、第一次来港的张先生，与妻子来港自由行5天，预计花费约3万元人民币，主要购买电子产品，认为兑换汇率后货品较内地便宜约一成。 来自海南的许小姐，一家四口自由行来港四天，选择来港是因为离家较近，而且可以带小朋友到迪士尼。她预计在港花费约两万元人民币，主要购买小朋友零食和用品。五年前曾来港的她认为，香港与内地购物差价没太大差别，反而内地的国庆折扣更多，但五年后普通话在港变得更普及。 据悉目前国内航线主要以上海、北京、深圳、成都、西安等作热门目的地，而境外热门…	2017-10-01	明报	即时港闻		479
高院庭内亮8吋菜刀 中年疑犯操普通话 警搜两轮未有发现 13:54	http://news.mingpao.com/ins/instantnews/web_tc/article/20171017/s00001/1508219002151	高院今早处理一宗藐视法庭案件时，一名中国籍男子在庭内亮出菜刀，并用普通话向法官陈嘉信叫喊“无法无天！你以为我找不到你”。警方指年约50岁的在逃疑犯高5呎4吋，蓄短发，操普通话，案发时身穿浅色间条Polo shirt、浅色长裤、凉鞋，携带棕色背嚢。案件交中区警区重案组第三队调查。 中区警区总督察劳瑞莲称，警方今早10时04分接报，高院一个法庭进行审讯期间，一名中国籍男子突从背嚢取出一把8吋长、刀锋5吋阔的菜刀，法官立即宣布休庭。警员到场后在法庭内进行两次全面搜查，但均无发现涉嫌藏有攻击性武器的疑犯。她指警方向现场人士收集资料，但未正面回应会否向法官录取口供。 案件现交中区警区重案组第三队调查，警方呼吁任何人士有与案有关的资料，可致电36601230与案件主管联络。	2017-10-17	明报	即时港闻		359
警方指高院持刀汉约50岁操普通话 14:06	http://192.168.0.5/hkejjs/2017-10-17/1679986.html	金钟高等法院今早发生一名男子持刀向法官高叫事件。警方表示，接报后派出大批警员到场调查，暂时未找到可疑男子。 中区警区总督察(行动)劳瑞莲表示，在法庭审讯期间，一名男子从其棕色背囊中拿出一把8吋长、5吋阔刀锋的菜刀，法官立即宣布休庭。警方到场后在全座法院进行两次全面搜查，没发现可疑人物。 她指出，可疑人物是一名中国籍男子，年约50岁，身高约5呎4吋高，短头发，操普通话，穿着一件浅色间条上衣、浅色长裤及凉鞋。 警方正翻查法院的闭路电视录影及向在场人士收集资料，案件会交由中区警区接手调查。	2017-10-17	信报	即时时事脉搏		279
会说普通话的丹麦“神童”	http://124.243.200.100/a.php?f=20171001/wf-22.txt	在中国，安赛龙有大批球迷，受欢迎程度丝毫不亚于林丹和谌龙。这不仅是因为他精湛的羽球技艺和英俊的外表，更因为他会说一口流利的普通话，让国人对这位丹麦“神童”增添了几分亲近感。 在联合国公布的世界最难语言中，汉语高居榜首，成为最让外国人头疼的语言。然而，这一世界最难语言都难不到勤奋、刻苦、又有语言天赋的安赛龙。他通过二十个月的刻苦学习，不仅能用流利的普通话进行交流，更能通过汉语拼音输入法写中文日记。安赛龙喜欢学习中文的一个很大原因，是他特别喜欢中国的“国宝”熊猫。在他家的客厅里挂着两幅熊猫图画，这是他父亲十几岁到北京学习羽毛球时买回来的纪念品。安赛龙对憨态可掬的熊猫十分着迷，更对将熊猫视为国宝的中国产生了浓厚的兴趣。 如今，当看到中国有庞大的羽毛球市场时，安赛龙学习中文的目标变得更加实际，他希望能够以自己的表现赢得中国赞助商的青睐，为打开中国市场做准备。 在安赛龙学习中文后，他拥有了自己的第…	2017-10-01	大公报	体育新闻		839
【网上热话】学校旅行都带功课 搞喊小朋友 操普通话家长：测验不合格，睇人玩是惩罚 17:53	http://news.mingpao.com/ins/instantnews/web_tc/article/20171110/s00001/1510303288161	香港学童出名功课考试压力沉重，一年一度学校旅行，想必孩子总想好好玩一玩。不过，有家长在网上分享，指陪伴子女参加学校小一亲子旅行时，竟看到有家长带同功课前往，让子女可在旅行时做，最终更见该名学生哭了，令她大感不开心。 在FB专页“不愿小朋友成为功课奴隶”分享事件的妈妈表示，忍不住问了这名家长为何要带功课，直指旅行应是孩子放松的日子，谁知对方以普通话回应称，儿子测验全不合格，故不能玩，只能看他人玩，而这是惩罚，有关说法令不少家长都看不过眼，出声劝吁惟对方没理会。 她又指就事件向老师反映，介入后家长才愿收起功课，惟该名孩子最终仍只能乖乖坐一旁，没有参与其他活动。 不少网民对这名孩子的遭遇感愤怒，认为家长管教方式有问题，直指如这样倒不如不让子女参加旅行。亦有人认为这个惩罚方法是一种精神虐待：“唔合格洗唔洗咁罚呀，个小朋友自杀你就后悔。”	2017-11-10	明报	即时港闻		404
50校直播 学生听普通话难明	http://www1.hkej.com/dailynews/article/id/1704449/	约50间中学校内直播基本法委员会主任李飞讲话，包括葵涌狮子会中学，安排逾100名学生集体在礼堂收看直播，并计及为通识及中史科课时；有学生表示，李飞以普通话发言会“听漏”及不明白，亦有学生会后质疑《基本法》源于宪法，“咁《基本法》订立嘅意义系乜嘢，我唔明囉。”不过也有人称有助对宪法及《基本法》了解更多。 校长林日丰认为讲座学术性，内容属严肃课题，形容“大学生都未必听得咁耐”，校方事后派发问卷予学生收集直播意见，其后会给予教育局参考。 另一方面，除社民连及香港众志等在李飞讲话会场外示威外，人民力量昨晨于作直播的学校外派发红布，希望不愿观看者以布蒙眼或绑手示威；教育局谴责有组织在校外向学生作政治宣传，是企图干扰教学安排，建议如学校发现有学生受滋扰应向执法部门求助。人力则反驳局方安排直播才是滋扰学生。教联会批评有人故意挑起事端、严重干预校政，呼吁停止施压行动。	2017-11-17	信报	政坛脉搏		405
【李飞演讲】指学生难明普通话 听众批直播“擦鞋”	http://www.stheadline.com/inews-content.php?cat=a&nid=250203	基本法委员会主任李飞昨在《基本法》研讨会上表示，香港仍未就23条立法，法律缺位所带来的不良影响是有目共睹，当中有约50学校直播演讲。教育界立法会议员叶建源出席电台节目时表示，休息时间与李飞交谈，向他表达不同意学校直播安排，引述他回覆时，演讲对象是对基本法有一定认识的人士，知道有学生收看直播，若迁就中学生，内容会太浅白，现场人士会“无意思”。 对于有约50间学校直播演讲，他续指，不少学生正常上课都会打瞌睡，更何况在两小时的基本法普通话演讲，相信没有镜头下学生分心情况更严重，“即使几咁醒神都好，但睡魔突袭都冇办法”。他认为，演讲远离学生学习环境，指是政治任务，学校都隆重其事，故安排直播。 他认为，类似直播演讲安排应尽量避免，因政治意味太重，指情况不理想。他指，学校可以将演讲记录，剪辑后加上字幕再播放予学生观看。 听众石先生表示，不明白为何不邀请熟悉基本法而又懂广东话的人士演讲，指李飞以家长式…	2017-11-17	头条日报	即时港闻		448
三星语音助手Bixby 支援普通话	http://paper.hket.com/article/1953792	三星语音助手Bixby原仅支援韩文及英文，最新加入以普通话及简体中文与用户沟通，Galaxy Note 8、S8及S8 Plus用户最先受惠。 内地记者在发布会现场实测，发觉Bixby理解力强，可因应音乐App“打开”及“播放”某首歌曲的指令，作出不同反应，前者仅在App内找出歌曲，后者直接转到音乐播放页面，用户点击确认播放即可。	2017-11-23	经济日报	行政人员		179
三地高校普通话辩赛 浸大夺冠	http://paper.wenweipo.com/2017/11/24/ED1711240003.htm	（记者 高钰）今年的“粤港澳高校普通话辩论赛”日前举行，大会邀请了香港浸会大学、暨南大学及澳门科技大学三地的辩论队在广州较量，就社会关注议题及热门话题展开连场比拚，最终由香港浸会大学勇夺冠军。 “粤港澳高校普通话辩论赛”自2007年起轮流在三地举行，今年已是第十一届，比赛日前于暨南大学举行。首场辩论赛的辩题为“门当户对是不是过时的婚姻价值观”，由正方的暨南大学对反方的香港浸会大学对垒。 第二场辩题为“国学传承应以走精英化还是大众化路线为主”，由正方澳门科技大学迎战反方的暨南大学。最后一场比赛的辩题是“网购狂欢节是不是一种好的商业模式”，浸大及澳门科技大学对决。 科大亚军 暨大季军 来自香港、澳门及广州的逾百名大学生到场为己校的辩手打气，辩手们针锋相对、词锋锐利，论证旁征博引，说话幽默风趣，不时引来台下观众的阵阵掌声。 经过三场精彩的辩论，最终浸大勇夺冠军，亚军及季军得主分别为科大及暨大。…	2017-11-24	文汇报	新闻透视眼		599
粤港澳普通话辩论赛 浸大夺冠	http://124.243.200.100/a.php?f=20171124/fytx-13.txt	始自2007年的“粤港澳高校普通话辩论赛”，今年踏入第十一届。本届比赛由香港电台普通话台、广东广播电视台新闻广播及澳门广播电视股份有限公司合办，作赛队伍为香港浸会大学、广州暨南大学和澳门科技大学。 比赛上周六假广州举行，首场辩论赛的辩题为“门当户对是不是过时的婚姻价值观”，由正方的暨大对反方的浸大。第二场辩题是“国学传承应以走精英化还是大众化路线为主”，由正方的澳科大对反方的暨大。最后一场辩题是“网购狂欢节是不是一种好的商业模式”，浸大为正方，反方为澳科大。 结果，浸大赢得冠军，澳科大和暨大分别为亚军和季军。三场的最佳辩手，分别为暨大的余国宁，澳科大的吴婉怡和浸大的何浩申。 赛后，浸大普通话辩论队成员表示，思辨能明智，善辩能明理。真正的辩论不在于双方观点的绝对结果，辩论乃在历史及现实交汇下对问题作出剖析和思考，是不同思想的理性整理和交流。 “2017粤港澳高校普通话辩论赛”各场赛事，将于…	2017-11-24	大公报	放眼天下		537
西九故宫馆聘行政总监 须20年经验擅普通话 (10:23)	http://m.on.cc/nc/hknews/20171125/20171125102302lc.html	【on.cc东网专讯】将于2022年落成的西九故宫文化博物馆，继早前公布设计概念后，随即密锣紧鼓埋班，今天(25日)公开聘请行政总监一职，要求拥有最少20年策划、设计或营运中国/亚洲或古代艺术博物馆的经验，其中10年更需担任高级行政职位，须兼擅中文、英文及普通话，能操粤语者更佳，但就未有注明薪酬多少，下月8日截止申请。 西九文化区管理局今天在其官方网页及报章刊登广告，招聘故宫文化博物馆行政总监，职务包括统领香港故宫博物馆的管理工作，为博物馆订立发展愿景和为其营运、品牌和筹募方面制订业务策略。 广告又列明，在规划及施工阶段，要组建干练的人才团队，以实现博物馆的愿景，并与管理局其他部门通力合作，确保博物馆项目在既定的施工时间和财政条件下如期竣工，又需要和故宫博物院建立紧密的工作关系，并与其他本地、内地、国际博物馆及业务伙伴建立联系，督导香港故宫文化博物馆的整体策略，并负责监督其日常营运及未来…	2017-11-25	东方日报	即时港闻		643
新大楼曝光 青少年军操拳 普通话喊“杀”	http://premium.mingpao.com/cfm/Content_News.cfm?Channel=gb&Path=67371821362/gzc1.cfm	【明报专讯】旧年因为觅地兴建总部同拨款引起争议嘅青少年军，（口依）家已经有接近800个会员，噚日青少年军邀请传媒去佢哋位于九龙湾、由空置学校改建嘅新总会大楼参观，仲即场安排唔少学员表演。其中军体拳训练，教官系用普通话口令，几个十几岁学员每挥一拳都要用普通话大嗌：“杀！” Emily同一班行家担心军体拳会唔会渲染暴力，青少年军总会咨议会成员、警务处前副处长冯兆元就话，大叫“打”、“杀”都系军体拳一部分，如果唔嗌会“无咗气势”，并非真正要教学员杀敌。 冯兆元：跟内地用普通话指令 冯兆元话中式步操同军体拳喺内地都系用普通话指令，佢哋教时会跟番用普通话。冯兆元又话，教官会接受解放军培训，再教授青少年军学员中式步操同军体拳等。 对于早前被指觅地同申请拨款时，受到同为青少年军荣誉顾问嘅民政事务局长刘江华“极速审批”，青少年军总会主席陈振彬话，申请时睇过十几间校舍，亦试过申请失败，而拨款系佢哋主动联络…	2017-12-04	明报	港闻		512
教你下厨……的普通话	http://stepaper.stheadline.com/news_content.asp?newsid=F04202.txt&newscat=F&newsdate=2017-12-05	你会自己下厨（xia chu）做饭吗？你会上网查看食谱吗？你会和朋友交换下厨心得吗？有时候，上网查食谱，看到一些源自内地的网页，有没有一些词语让你看得一头雾水？有时候，想跟说普通话的亲友聊聊下厨的心得，却发现很多烹调方法不知道用普通话怎么表达？今天，我们来聊一聊厨房里的粤语和普通话。 烹饪之前，一般都需要把食材做一些处理。肉类如猪排或“牛展”（牛腱（niu jian））在烹煮之前，会先用糖、盐或醋等调料腌（yan）一段时间，方能使味道渗入内部，这是“入味”的方法。 “飞水”与“焯水/汆水” 那么有没有“出味”的方法呢？因为有些肉类，如排骨、瘦肉均须洗掉血污，去掉血腥味。一种方法是先把水“煲滚”（烧开（shao kai）），然后把肉放进开水里，略微一煮就拿出来。另一种方法则是先把肉放进冷水里，再把水烧开，水开就关火。这样，煲汤或者炖（dun）煮的时候，汤、汁的表面就不会有浮沫了，汤的味道也…	2017-12-05	星岛日报	教育		1053
MAMA：BTS晒英文 世勋赖冠霖普通话冧港迷 (18:09)	http://m.on.cc/nc/ent/20171201/20171201180919en.html	【on.cc东网专讯】韩国人气男团防弹少年团(BTS)刚刚现身亚博举行的《MAMA音乐颁奖礼》时，再度引来全场粉丝尖叫，队长RM以英语向大家问好，成员V表示《MAMA》是他们达成梦想的地方。而凭韩剧《Signal》获得不少人气的男星李帝勋，表示是首次参加《MAMA》，好期待今晚的表演，透露平时最爱听“脸红的思春期”及Hyukoh。之后女星李荷妮晒腿现身，十分优雅，她以英语向大家问好，表示有机会想与防弹少年团合作。 人气新人男团Wanna One紧接现身，姜丹尼尔更兴奋瞓地摆甫士。姜丹尼尔以英语向大家问好，台湾成员赖冠霖以普通话表示今次到越南、日本及香港三地参加《MAMA》十分荣幸，成员黄旼炫透露年末会开演唱会，将与粉丝一起度过。 其后人气男团EXO现身，令现场尖叫不断，成员世勋以普通话表示很久没来，见到粉丝很开心。而灿烈表示刚完成首尔演唱会，之后更会到香港及其他地区举行巡演，望大家多多期…	2017-12-01	东方日报	即时娱乐		425
讲单字当识普通话 中介懒查外佣资历	http://www1.hkej.com/dailynews/article/id/1725667/	消委会昨日公布多项消费调查结果，当中包括浴室暖风机、口罩等【表2】，而外佣中介公司则服务欠佳、“货不对办”情况普遍。截至今年10月，消委会共收到163宗关于代聘外佣的投诉，会方发现绝大部分中介只靠海外合作伙伴查核外佣资历，本身不会主动跟查，认为做法粗疏，不应将相关责任转嫁消费者。此外，不同中介收费差异大，最多竟达124%。 雇主选择合适外佣并非易事，往往只能全盘信赖中介公司，惟全港有逾千间提供外佣中介服务的介绍所，质素良莠不齐，找错了公司随时引起消费纠纷。周先生今年1月透过一间中介公司，付9980元服务费聘请一名印佣，有关公司承诺女佣可在4月中上班。然而，到了预定上班日子，中介公司职员却致电周先生称联络不上该女佣，又指公司无任何解决办法，且没有协助他另选佣工。 甩底无跟进拒退款 周先生遂到中介公司理论并要求退款，但公司负责人称若要另觅女佣需等一年，同时拒绝退款，强调除非周在其他中介公司觅…	2017-12-15	信报	独眼香江	纪晓风	1121
事业谋发展 学好普通话	http://paper.wenweipo.com/2017/12/16/CH1712160030.htm	说起刚到内地的那段时间，因为不熟悉，阿豪坦言天天都提心吊胆。“来内地之前，在香港看到很多媒体在报道内地时，将内地治安说得很吓人，叮嘱市民进内地一定要『小心钱包』，似乎内地满街都是抢劫犯。但我在内地十多年，特别在长沙这几年，感觉内地治安其实特别好，即使午夜之后，跟朋友出去消夜也没问题，连小偷都从来没有遇到过。反倒是阿明，在美国曾被人拿枪指着头当街抢劫，他现在回忆起来都心有余悸。” 不会普通话生意没谈成 当然，阿豪在内地也遇到过麻烦。阿豪说起，他初入内地做食材批发时，有朋友给他介绍了一笔浙江的生意，利润相当可观，阿豪赶到杭州与客商面谈。可那时阿豪只懂英语和粤语，不会说也听不懂普通话，没办法最后只能用纸笔书写与客人交流，场面相当尴尬，生意自然也没能谈成。 这件事让阿豪明白，要想在内地发展，不懂普通话将寸步难行。自此，他开始努力学习普通话，他对语言的感悟力很不错，很快就掌握了普通话，现在跟内地的…	2017-12-16	文汇报	两地融通		444
政情：公民讲场：西九故宫请总监 最紧要识普通话	http://orientaldaily.on.cc/cnt/news/20171126/00176_106.html	西九文化区内嘅香港故宫文化博物馆预料喺二○二二年落成，准备工作已经密锣紧鼓开展，好似行政总监招聘工作就喺寻日开始。呢个职位要求有最少廿年相关经验，又要擅长两文三语，但识粤语嘅求职人士只系更佳，即系最重要都系普通话囉！仲记得西九戏曲中心顾问小组成员汪明荃（阿姐），早前就戏曲中心任命外国人为艺术总监好激气，殊不知对方能操流利普通话，睇嚟识普通话先有前途喇。阿姐不妨考虑亲自上阵去应征呢个职位，以佢嘅专业资历应付呢个职位绰绰有余喇！	2017-11-26	东方日报	港闻		216
澳洲总理讲普通话：澳大利亚人站起来了！	http://orientaldaily.on.cc/cnt/china_world/20171210/00178_004.html	【本报综合报道】澳洲总理特恩布尔日前宣布将推行新的反间谍和外国干预法，又指中国影响力正干预澳洲政治，中方随即反斥有关说法危害两国关系。特恩布尔昨日用普通话回应中方批评，称“澳大利亚人站起来了！”矢言仿效一九四九年的中国般，捍卫澳洲主权。 华商资助工党议员感担忧 特恩布尔罕有用强硬的措词表示，不认同中方的批评，并强调确有外国势力干预澳洲。他中英夹杂的说：“现代中国是建立于一九四九年的，当时就有了『中国人民站起来了』这句说话。这句话代表了主权及尊严。”他特别再用普通话称：“澳大利亚人站起来了！” 已故中共领导人毛泽东在一九四九年中华人民共和国成立时，曾宣称“中国人民站起来了”。中国外交部新闻发言人耿爽前日在例行记者会上表示，对特恩布尔采信传媒有关中方干预政治报道感到震惊，又指有关报道是无中生有及对中方充满偏见。对此，特恩布尔回应指，对于工党联邦参议员邓参森涉获中国富商祝敏申资助一事，自己有理…	2017-12-10	东方日报	两岸		440
政情：今日你上镜：雷礼权献唱用心 纠正普通话发音	http://orientaldaily.on.cc/cnt/news/20171225/00176_104.html	“九巴后人”雷礼权较早前出席一个慈善音乐会，期间献唱普通话歌，听落好似好简单嘅一件事，其实事前做咗好多准备。早前喺中环街头见到佢收工后赶住去练歌，佢笑言因为听开台湾歌手周杰伦嘅歌曲，当正周杰伦系师傅，点知唔多唔少学咗对方嘅懒音，被朋友话佢发音唔太准，所以要急急练番正喎！虽然只系慈善演唱，估唔到佢都几认真。	2017-12-25	东方日报	港闻		155
廉署请助理廉政主任 懂普通话有优势	ttp://skypost.ulifestyle.com.hk/%E6%B8%AF%E8%81%9E/%E6%96%B0%E8%81%9E%E4%BA%8C%E6%A2%9D/20170116/001/%E5%BB%89%E7%BD%B2%E8%AB%8B%E5%8A%A9%E7%90%86%E5%BB%89%E6%94%BF%E4%B8%BB%E4%BB%BB%20%E6%87%82%E6%99%AE%E9%80%9A%E8%A9%B1%E6%9C%89%E5%84%AA%E5%8B%A2/2	廉政公署正展开新一轮招募，署方现正招聘约20至30名助理廉政主任。 【晴报专讯】廉政公署正展开新一轮招募，署方现正招聘约20至30名助理廉政主任，起薪点为20,345港元，申请人需在文凭试或会考中取得5科2级或E级成绩，或具同等学历，相关职位顶薪点为为36,295港元。同时，署方强调能操流利普通话会是有利条件，受聘者会以合约形式雇用，合约为期2年半，若期间表现良好，合约结束时可另获25％约满酬金。 职责方面，署方指相关职位主要职务包括协助调查贪污及相关罪行投诉、搜集证据、搜查及参与拘捕行动，并需作财务分析，接受枪械训练，甚至是卧底行动。	2017-01-16	晴报	港闻		295
廉署聘助理主任 懂普通话有利	http://orientaldaily.on.cc/cnt/news/20170116/00176_038.html	【本报讯】廉政公署正招募助理廉政主任，入职月薪超过两万元，为该署薪级表第四点。廉署计划招聘二十至三十名助理廉政主任，除了能操流利中英文外，更强调操流利普通话有利获聘，人员入职后负责调查贪污及相关罪行的投诉、搜证和卧底行动等。 拟请30人月薪逾二万 廉署刊登招聘广告，聘请执行处助理廉政主任，最高薪酬点逾三万六千元，即薪级表第十四点。受聘人士通常以合约方式雇用，合约为期两年半，工作表现及行为良好，可在合约结束时获发约满酬金。除学历要求，申请人亦需参加体能测试及视力测试。除调查工作外，职务还包括财务分析、制备调查报告、接受枪械训练及参与证人保护工作等。招募活动将于下月三日截止。	2017-01-16	东方日报	港闻		313
文翠珊普通话向华人拜年 盼再访问中国	http://www.stheadline.com/inews-content.php?cat=b&nid=18227	临近农历新年，英国首相文翠珊向全球华人送上新春祝福，指未来一年对于中英关系将是非比寻常的一年，期待再次访华，她又赞扬华人群体对英国社会贡献巨大，最后她更以普通话说“新年快乐”。 文翠珊向英国、中国以及全世界庆祝春节的华人送上新年祝福，她指出，中英关系的起点，比任何时候都要坚固。15个月前，中国主席习近平对英国进行历史性访问。英国获得的中方投资，比任何其他欧洲大国都多。目前，有15万的中国留学生在英国学习，而在这5年间，中国游客数量也升近一倍。 她又指，作为联合国安理会常任理事国，中英两国在紧迫的全球性事务正努力携手合作。而在今年还有更重要的纪念日，就是香港主权移交20周年及中英建立大使级外交关系45周年，她期望透过今次机会，在商业、外交、教育、旅游以及文化等让中英的关系更进一步，英国也在打造一个全新的面貌，成为世界上最开放的自由贸易国家。 文翠珊表示，去年曾到访杭州，是她首次与习近平会面…	2017-01-26	头条日报	即时国际		514
【特首选战】林郑访沙田给普通话行乞老妇500元 18:22	http://std.stheadline.com/instant/articles/detail/327206-%E9%A6%99%E6%B8%AF-%E3%80%90%E7%89%B9%E9%A6%96%E9%81%B8%E6%88%B0%E3%80%91%E6%9E%97%E9%84%AD%E8%A8%AA%E6%B2%99%E7%94%B0+%E7%B5%A6%E6%99%AE%E9%80%9A%E8%A9%B1%E8%A1%8C%E4%B9%9E%E8%80%81%E5%A9%A6500%E5	行政长官参选人林郑月娥今日下午先后到西贡及沙田，与市民交流。她到访沙田时，给予一位在路边行乞、讲普通话的婆婆500元。林郑问该婆婆是否香港人、有无家人等，婆婆只摇否认。 林郑月娥到访西贡后表示，自己80年代初曾在西贡政务处工作，有关的地区工作给她很大启发，认为制订政策时要多了解地区情况，与市民沟通回应诉求，期望本港可以再有这种凝聚力和社会和谐。 她到访沙田时，先后到沥源健康院、沥源邨与食环署辖下的沙田街市。她表示自己喜欢到街市买菜，认为要改善公共街市设施，又表示要处理领展商场租金高昂的问题。 对于全国政协常委唐英年较早时，指她在经济方面经验不足。林郑月娥表示，对任何评价都谦虚接受，如社会人士认为她某些政策不足，她会努力学习多聆听及沟通。 至于是否取消BCA，林郑月娥表示，如果当选，教育是重点工作之一，稍后将接触教育界听取意见。 另外，林郑月娥的竞选办表示，有传媒指林郑月娥透过中联办约见泛…	2017-01-27	星岛日报	即时香港		478
【特首选战】林郑访沙田 给普通话行乞老妇500元	http://www.stheadline.com/inews-content.php?cat=a&nid=18815	行政长官参选人林郑月娥今日下午先后到西贡及沙田，与市民交流。她到访沙田时，给予一位在路边行乞、讲普通话的婆婆500元。林郑问该婆婆是否香港人、有无家人等，婆婆只摇否认。 她指自己80年代初曾在西贡政务处工作，有关的地区工作给她很大启发，认为制订政策时要多了解地区情况，与市民沟通回应诉求，期望本港可以再有这种凝聚力和社会和谐。 她到访沙田时，先后到沥源健康院、沥源邨与食环署辖下的沙田街市。她表示自己喜欢到街市买菜，认为要改善公共街市设施，又表示要处理领展商场租金高昂的问题。 对于全国政协常委唐英年较早时，指她在经济方面经验不足。林郑月娥表示，对任何评价都谦虚接受，如社会人士认为她某些政策不足，她会努力学习多聆听及沟通。 至于是否取消BCA，林郑月娥表示，如果当选，教育是重点工作之一，稍后将接触教育界听取意见。 另外，林郑月娥的竞选办表示，有传媒指林郑月娥透过中联办约见泛民选委，认为是不负责…	2017-01-27	头条日报	即时港闻		468
【特首跑马仔】500元赠操普通话行乞妇惹争议 林郑：善心先行 忽略可能引起批评 21:04	http://news.mingpao.com/ins/instantnews/web_tc/article/20170127/s00001/1485521937684	行政长官参选人、前政务司长林郑月娥今日到访沙田排头村时遇上一名操普通话行乞老妇，并赠她500元钞票。有线新闻报道，该名行乞老妇自称从湖北来港两天，称家中欠债，由亲人带来港，她自己不想来。 林太向操普通话行乞老妇金钱，遭网民疑质鼓励内地人来港非法行乞，事件惹起争议。林郑月娥竞选办回覆本报查询，指“林太善心行先，年三十碰见婆婆行乞，感到心酸因而向她施予，忽略了可能引起批评。那一刻她只想令婆婆在年晚感觉好一些”。 林太今午在沙田排头村遇到一名老妇在路边行乞，林太遂上前慰问道：“你有无地方住呀？”、“你系咪香港人？”老妇以普通话回应：“我不懂。”林太随即转用普通话说：“你辛苦了。”然后从外套袋取出一张500元钞票递给老妇，离开时向她说：“新年好，你小心一点。”	2017-01-27	明报	即时港闻		354
【特首选战】林郑施舍普通话行乞妇 张建宗：“若出于善心大家勿太执著”	http://www.stheadline.com/inews-content.php?cat=a&nid=18986	政务司司长张建宗被问及有内地人来港行乞是否普遍，给钱他们是否犯法。他回应若是出于善心，大家不用太执著。 张建宗出席林村许愿树活动时被问及有内地人来港行乞是否普遍，给钱他们是否犯法。回应指，要视乎事件，若是出于一片爱心，而不是鼓励他人行乞的话，是善心，相信大家不用太执著。 昨日行政长官参选人林郑月娥到访沙田时，向一位据称来自湖北的行乞老妇给予500元。其后林郑月娥竞选办指，林太是善心先行，年卅见到婆婆行乞，感到心酸因而向她施予，忽略可能引起批评；林太当时只想令到婆婆在岁晚感觉好一点。	2017-01-28	头条日报	即时港闻		267
社协：行乞人士多操普通话 毋须社工协助 17:01	http://topick.hket.com/article/1648221/	特首参选人林郑月娥日前在沙田落区时，向一名从内地来港行乞的婆婆施予500元，惹来争议。社区组织协会干事吴卫东今早接受电台访问时，指香港已经很少本地人士行乞，感觉现时行乞人士是“专业级”，不断磕头。 他曾与他们聊天，对方大多操普通话，残障行乞人士的情况则“似集团处理过”，透过唱歌行乞的则拥有专业设备，似内地做法，相信来自内地。 吴卫东指，向这些人士查问有何需要帮助时，对方大多不理会或要用普通话沟通，他们亦毋须社工协助，只继续行乞，形容“似份工”，香港人亦无法帮到他们。 他提醒港人，不鼓励施予金钱给这些行乞人士，可考虑改以捐钱予帮助弱势社群的团体。	2017-01-31	经济日报	即时社会		310
文翠珊普通话贺华新年	http://stepaper.stheadline.com/news_content.asp?newsid=A16067.txt&newscat=A2&newsdate=2017-01-27	英国首相文翠珊周四展开访美之旅，她在出行前透过其官方网友表示，希望可以再次访华，并加强中英两国在商业、外交、教育、旅游等多方面的关系更进一步。她亦趁临近农历新年向全球华人拜年，以普通话说“新年快乐”。互联网	2017-01-27	星岛日报	中国		105
团体倡设推广普通话办公室	http://124.243.200.100/a.php?f=20170209/jx-16.txt	【大公报讯】香港普通话研习社认为，香港人近年对普通话重视的程度出现了倒退的现象，教育局推行的新学制是罪魁祸首之一。一来，2012年开始的中学文凭考试取消了普通话科，只余下中文科的口语考试，但98%考生都选择粤语应考，形成他们没有必要再学习普通话。研习社主席麦淦渠认为，香港要做“超级联系人”，特首参选人宜考虑成立一个“推广普通话办公室”。 麦淦渠指出，要成为国家的“超级联系人”，香港人说好普通话是必须的。首先中学文凭试要考普通话，“一个最简单的做法，就是在中学文凭试中文科的口语考试部分，硬性包括普通话能力的考核，从而带动中学生学习普通话的动机。当然长远来说，文凭试复设普通话科，或推行普通话教中文，也是应该探讨的。”其次，香港政府公务员应做好带头作用。现时专业职系的公务员中，不懂说普通话的大有人在。“要改变这个情况，政府首先可以在招聘公务员时，要求应聘者具有正规的（获香港学术及职业评审局确认…	2017-02-09	大公报	科技新知		500
普通话刀贼鹰巢山劫妇人	http://stepaper.stheadline.com/news_content.asp?newsid=A06022.txt&newscat=A1&newsdate=2017-02-14	长沙湾鹰巢山再现“蛇匪”剪径！一名中年女子，昨午行山途中，遇操普通话贼人持双刀架颈截劫，损失现金及手机共值近二千元，事主其后须花近句钟返回山脚报警，大批警员接报持盾牌登山搜匪，惟至入黑未有发现，相信今日会大规模搜捕。 警今大规模搜山 遇劫女事主姓莫（五十三岁），昨午五时许，莫妇独自到鹰巢山自然教育径行山，至半山腰的麦理浩径第五段时，暗处突扑出一名男子，并持两柄长短刀指吓，贼人继而以普通话大喝“打劫！”再以刀架向女事主颈项。 女事主在刀口下不敢反抗，交出银包内四百多元现金，及一部值千多元手提电话，匪徒得手后跳入附近山坡草丛逃去，女事主见四野无人，连忙下山求救。约一句钟才走到山脚，遇上一对情侣，连忙向他们借用手机报警。 大批警员接报赶至，由于贼人有利器，警员手持盾牌登山搜捕，惟经句钟搜查未有发现，遂带同女事主返回警署协助调查，莫妇仅受惊，未有受伤。去年底，上址山头亦发生怀疑“蛇匪”连环行劫行…	2017-02-14	星岛日报	港闻	罗振辉	561
鹰巢山再现普通话山贼 行山女遭刀降颈抢劫 (19:24)	http://m.on.cc/nc/hknews/20170213/20170213192450lc.html	【on.cc东网专讯】长沙湾大埔道鹰巢山再现操普通话山贼。下午5时许，一名40余岁的女子独自行山，由鹰巢山自然教育径行至麦理浩径五段时，突有一名男子，手持一把长刀扑出，操内地口音大声喝叫：“打劫！”复用刀架着女事主颈部。 女事主惊慌失措，无力反抗下，被贼人劫去其银包及手机，贼人得手后向黄大仙方向逃去无踪，女事主急忙沿路落山，行约一小时后，至傍晚6时许，在近山脚的金山郊野公园，遇到一对行山情侣，即向对方求助，借来手机报警。 警员接报赶至，持盾牌在山头搜索贼踪，惟未有发现。由于女事主惊魂未定，未能清楚交代贼人容貎，只称：“好黑，睇唔清楚。”女事主其后随警员返署助查，其损失有待点算。警员将案列行劫，正在了解事件原因。 去年12月27日中午12时许，鹰巢山自然教育径曾于25分钟内，发生2宗行山客遭山贼洗劫案。先有一名独自行山姓曹妇人遭贼人持刀截劫，及后再有一名妇人与3子女被劫，众人身上共值约一万…	2017-02-13	东方日报	即时港闻		454
【七警囚2年】支持者庭外大哭大叫 普通话斥判决对警察不公 10:38	http://news.mingpao.com/ins/instantnews/web_tc/article/20170217/s00001/1487298166165	2014年占领运动期间，7名警察把当时的公民党成员曾健超拖到“暗角”拳打脚踢，7人日前各被裁定一项“袭击致造成身体伤害”罪成，案件今早于区域法院判刑，7人各被判囚2年；第5被告陈少丹另因“普通袭击”罪成，判囚1个月，同期执行。在庭外，有七警支持者闻判后大哭大叫，并用普通话指“对警察很不公平，没有用暴力打人，示威者打警察只判社会服务令”。她强调警察是正义。 7名被告依次为有组织罪案及三合会调查科总督察黄祖成（50岁）、观塘区反黑组高级督察刘卓毅（31岁）、观塘区反黑组警长白荣斌（44岁）、观塘区反黑组警员刘兴沛（40岁）、东九龙总区刑事总部警员陈少丹（33岁）、九龙城区刑事侦缉警员关嘉豪（34岁）及观塘区反黑组警员黄伟豪（38岁）。	2017-02-17	明报	即时港闻		332
【山贼再现】西贡三块田现贼踪 操普通话男子持菜刀扑出 行山母女遇劫失财 00:52	http://news.mingpao.com/ins/instantnews/web_tc/article/20170221/s00001/1487607427345	继上周一（13日）长沙湾鹰巢山再发生行山人士遇劫案件后，事隔一周，西贡黄泥头亦现山贼踪影。一对母女本结伴行山期间，遭操普通话男子持菜刀“拦途截劫”贼人掠去事主身上饰物、手机及少量现金后逃去。事后大批警员登山搜捕，暂未有发现。 消息称，本周一下午5时许，一对母女结伴在西贡行山至黄泥头近三块田时，一名持菜刀戴口罩男子突然从暗处扑出，以普通话声称打劫，母女不敢反抗，将身上颈炼、手炼、耳环、手机及约300元现金交出，山贼得手后逃去。母女惊魂甫定，沿山路步行至小沥源路到警署报案，未有受伤。 警方暂列抢劫案处理，派出大批人员登山搜捕匪徒，至今凌晨零时暂未有发现。	2017-02-21	明报	即时港闻		302
操普通话口罩贼劫路人	http://stepaper.stheadline.com/news_content.asp?newsid=A07023.txt&newscat=A1&newsdate=2017-02-28	上水疑有蛇匪出没！六十二岁姓梁男子昨凌晨近五时途经石湖墟一条行人隧道，遭操普通话的口罩贼持刀架颈截劫二千元，贼人得手后逃去。警方接报赶至兜截，惜无发现，不排除匪徒是内地人或蛇匪。	2017-02-28	星岛日报	港闻		91
德育拟列评核幼园指标 建议教普通话 认识中华文化	http://premium.mingpao.com/cfm/Content_News.cfm?Channel=gb&Path=101052842283/gna1.cfm	【明报专讯】教育局昨公布《幼稚园教育课程指引》（下称新指引），建议加强幼儿品德的培育，并纳为评核学校指标之一，但不会列“清单”点算幼童的品德学习成果；另又新增普通话教学，但非属强制。 教局：无点算清单 观课评表现 新指引增加幼儿的品德教育列为其中一项发展指标，包括教育幼儿如何认识自己、建立是非观念、表达情绪感受，以及与人和洽相处等。教育局举例，教师可在适合的学习主题中加入品德元素，如于“节日”主题学习尊重和欣赏、于“家庭”主题学习孝顺和关怀等；家长也应实践品德和良好生活习惯作榜样。 至于如何量化品德教育的成效，教育局首席教育主任（课程发展）吴加声表示，不会有“清单”点算幼童表现，而是透过观察学生与教师的接触。局方又称，视学人员会通过观课，评鉴学校教学活动和细节，检视学校帮助儿童掌握知识、技能与培养正确价值观和态度的情况，当中包括儿童在品德方面的情况，如礼貌、守规和尊重别人等。 家庭与学校…	2017-02-28	明报	港闻		1033
居屋客1.6亿连扫启德1号4伙 业主名普通话拼音 首置身分悭税逾1700万	http://premium.mingpao.com/cfm/Content_News.cfm?Channel=ea&Path=168421303605/laa1.cfm	【明报专讯】由中海外（0688）发展的启德1号I、II，因是全港唯一“港人港地”项目，由推出至今一直受市场关注。本报发现，大年初二以1.641亿元、实呎2.5万元破顶价购入项目一幢低座单位的买家，为一名居屋客，其在土地注册处登记的姓名为普通话拼音，据悉于上月初先沽出居屋单位，再以首置客身分买入启德1号单位，节省辣税超过1700万元。 明报记者 林尚民、林可为 上述成交单位为启德1号I低座第7座1楼、2楼、3楼、5楼共4伙，作价1.641亿元，为项目最大手单一成交，若以实用面积共6564方呎计，平均实呎2.5万元，创当时屋苑呎价新高纪录。土地注册处显示，有关单位以“钟惠平”名义购入，登记英文名字为普通语拼音Zhong Hui Ping，估计具内地背景。市场消息指，该名买家与内地有不少生意往来。 8年前206万购采颐单位 本报综合代理及土地注册处、公司注册处资料，钟惠平报住地址为新蒲岗居屋采…	2017-02-16	明报	香港地产		1210
港学子普通话字正腔圆	http://124.243.200.100/a.php?f=20170309/zm-45.txt	座谈会气氛热烈，港生踊跃发言，一口字正腔圆的普通话，一时间令人难以分辨竟是来自香港。让不少讲着“港式普通话”的委员们羡慕不已，更让现场来自内地的工作人员纷纷竖起大拇指点赞。唐伟章委员感叹，听到学生讲的普通话，很骄傲。“我是香港出生香港长大，中学毕业去了美国读大学，30多年才回香港，普通话是当了校长以后才开始学的，远远不够你们好。” （记者 李望贤）	2017-03-09	大公报	中国特稿		177
伦敦火车站首播普通话	http://www1.hkej.com/dailynews/article/id/1512099/	伦敦马里波恩站（Marylebone）将成为英国首个用普通话及阿拉伯语进行站内广播的火车站，因过去18个月愈来愈多中国及中东游客前往牛津郡的Bicester Village名牌直销店，而到访当地要由马里波恩站出发。	2017-03-14	信报	EJ Global		109
港校长倡以普通话讲授中文课	http://paper.wenweipo.com/2017/04/04/CH1704040023.htm	除了担任香港保良局蔡继有学校的校长，刘筱玲还是香港小学中国语文教育研究学会的会长。教师出身的她一直致力于在香港推广用普通话讲授中文课，因为“语文教学是所有学科、所有学习的根”。 由于粤语在香港一直是主流语言，将普通话作为教学用语更有利于提高中文课教学质量在香港一度有争议。为此，刘筱玲还做了一项《用普通话讲授中文的实验与研究》课题，实验显示：普通话组学生对作品在语言的感受力、凭借语感的辨误能力、词汇掌握的准确度以及理解的准确性方面，分别比用粤语组学生高出2到5倍。 “现在，在政府的拨款支持下，我们协会每年会举办一场学生菁英大赛，内容涵盖语文写作、演讲、辩论等等，全港有300多所中小学的学生参加，最后我们会选出10名小学生和10名中学生，请他们游历内地多个历史名城，并到各地的中小学校进行访问交流，增长见识，提高写作水平。”	2017-04-04	文汇报	两地融通		388
教育为未来 学普通话是大趋势	http://124.243.200.100/a.php?f=20170406/hy-1.txt	上周六，学校举行小一入学简介会，全日共办了三场，每场都有近六百名家长参加，出席率达九成，算是很热闹了。/优才（杨殷有娣）书院校长 陈家伟 为了让家长有所获益，学校做了许多预备工作，例如先让家长简单看看学校的绿色环境，如绿色长廊、生物站、欣园及新园等，然后才引领他们到四楼礼堂听讲座。学校也特别播放了许多学校活动的短片予家长观看，如运动会、水运会、中秋送月饼、新春送暖大行动及优才慈善环保卖物会等，让家长了解学校。 简介会通常都有不同老师的介绍，包括笔者介绍学校的办学特色，外籍老师介绍英语课程，才华发展的杨主任介绍各类才华班，并邀请了学生作现场表演，包括两位同学的体育舞蹈，他们舞技精湛，合作纯熟，赢得了热烈的掌声。另外，中国鼓队的十多位鼓手打出气势来，节奏变化多端，手法姿势悦目，而艺术体操队的表演也有不少高难度的动作，女队员不但造型突出和服装美丽，而且人人都身体柔软、姿态优美。两个表演，都令观…	2017-04-06	大公报	校园版		996
海航：不会要求港员工“只讲普通话或英文” (20:49)	http://m.on.cc/nc/fin/20170408/20170408204905fi.html	【on.cc东网专讯】海航集团投资总裁兼海航国际首席执行官王爽就他所言的“文化投资”补充，指文化定义非常广泛，文化算是一个普遍族权共同生活的方式，中国有东方传统的文化，集团也尊重每个地区包括香港的文化，同时亦感兴趣。 以海航集团为例，员工逾40万名，欧洲及内地分别有10多万名，香港也有员工，不会要求员工只讲普通话或英文，反映集团接受文化的多样性。 若集团对产业有兴趣，最关键是与大众能产生共鸣，更重要找到共通点，这是集团一直寻找商业等投资的重要考量。	2017-04-08	东方日报	即时财经		250
行在春风里齐学普通话	http://stepaper.stheadline.com/news_content.asp?newsid=F04202.txt&newscat=F&newsdate=2017-04-18	又是一年草长莺飞时，不少人趁清明节、复活节假期或周末相约亲朋好友外出郊游，近距离感受春天的气息。在旅途中，大家用普通话交谈，互相切磋，学了不少普通话词语呢！今期分享一下。 在普通话中，人们习惯称春季郊游为“踏青”（ta qing），这是一个很富诗意的名字，彷佛沿途春草繁花相伴，生机勃勃。至于春游的地点，许多人会选择沿大帽山、狮子山、八仙岭等山径路线登高望远，既能呼吸清新空气，锻炼身体，又能一览春山如笑的美景，让心情豁然开朗。在粤语中，人们称这种春游为“行山”，相比普通话的“爬山”（pa shan）、“登山”（deng shan），听起来“悭力不少”。 “打千秋”与“荡秋千” 春游的另一热门目的地是郊野公园或海滨长廊。阳光和煦（yang guang he xi）的日子里，常见不少父母带上年幼的子女到此赏花、野餐、运动，度过一段愉快的亲子时光。有趣的是，一些民间活动在粤语中保留传统名称时，在…	2017-04-18	星岛日报	教育		1093
网议政事：讲句普通话都唔得 “新同盟”谭凯邦极霸道	http://paper.wenweipo.com/2017/04/24/HK1704240036.htm	喺小巴讲句普通话都要叫人返内地咁恶？讲紧嘅就系曾公开鼓吹“港独”嘅“新民主同盟”谭凯邦。谭凯邦前晚喺facebook出文，话自己喺小巴听到最少有3个人讲普通话，“我真系好想大声同佢地（哋）讲，『唔讲广东话，不如你地（哋）番（返）大陆（内地）啦！做乜落黎（嚟）。』”反对派嘅时事评论员梁启智都睇唔过眼，留言反问︰“如果只是他们互相之间讲，而唔系迫你同佢讲，借问声关你乜事？”不过，亦都因为咁，双方就开始骂战，“独派”就闹梁启智“左胶”、“祸港”，帮梁启智嘅就闹佢哋“有偏见”，并直言︰“作为政治人物，就算你有偏见，都唔适合公开散播仇恨，咁样只会对你不利。” 记者 甘瑜 谭凯邦前晚去完“香港众志”党庆，搭小巴听到前中后排都有人讲普通话，随即躁底出post，话想叫佢哋返内地。唔少“独派”都畀like支持，包括“天河明人”、梁金城等，连自己阿妈都系来自内地嘅冯敬恩都有畀like。 不过，讲句普通话都唔…	2017-04-24	文汇报	港闻		1335
扮客试戴名表即抢慌张贼被追弃赃逃警查天眼追缉普通话中年汉	http://stepaper.stheadline.com/news_content.asp?newsid=A31086.txt&newscat=A1&newsdate=2017-05-05	“无胆匪”假扮豪客，昨午在中区闹市光顾古董表店，声称欲购买一只价值十八万元名表，要求女职员取出，给他戴上手鉴赏时，突然夺门逃走，职员尾随追出呼救，贼人恐被捕，边走边“卸赃”，逃至十米外丢下名表逃去，警方赶至兜截贼人无果，根据“天眼”录影，追缉一名操普通话男子归案。 男子扮顾客抢十八万元名表被追捕，丢下名表逃去，表行失而复得。现场为皇后大道中近雪厂街，嘉轩广场一楼一家二手古董表店，一度被抢走的瑞士天梭古董表，镶有钻石、价值十八万五千元，店方经初步检查，证实它虽被贼人掉落地上，幸只有轻微刮花。 昨午二时许，古董表店刚巧未有顾客，只有女职员在看铺，其间一名打扮斯文、操普通话中年男子进入店内，向女职员表示，欲购买橱窗内一枚镶钻古董名表，要求女职员取出给他试戴，二十二岁姓邓女职员不虞有诈将名表取出，他立即戴上手鉴赏，讵料他再要求拿取另一名表作比较，女职员以为有豪客光临，转身拟拿取另一名表时，他突然…	2017-05-05	星岛日报	港闻	尹敬堂	729
政Whats噏：张建宗港式普通话 两制变两鸡 (12:26)	http://m.on.cc/nc/hknews/20170430/20170430122620lc.html	【on.cc东网专讯】香港回归中国之后，不少官员在公开发言时都要以普通话发言，但并唔系每个官员都擅长三文两语，所以经常闹出笑话。政务司司长张建宗今日出席一个回归二十周年研讨会时，就以罕有以普通话致辞，他提到“一国两制”时竟然讲成“一国两鸡”，表现“技惊四座”。 张建宗发言时指，《基本法》规定香港的制度，保障香港的一国两制、港人治港和高度自治，对保持香港繁荣稳定有重要作用。他又认为，市民要全面认识《基本法》，才可以发挥作用。 短短十分钟的发言，张建宗似乎都讲得相当吃力，一开始时他尝试“字正腔圆”读出正确读音，不过“两制”仍然读成“两鸡”，“我很高兴”亦读成“胶兴”；而发言去到尾段，张建宗似乎处于半放弃情况，港式普通话全面进场，已经去到几乎听唔明的程度。讲到尾，为免语言成为两地官员之间的隔阂，张建宗似乎要尽快练习普通话先得喇！	2017-04-30	东方日报	即时港闻		390
Kelly Online：张建宗“煲冬瓜”普通话 重要=中腰？正确=征cher？	http://www.stheadline.com/inews-content.php?cat=a&nid=82231	政务司司长张建宗今日出席，一国两制青年论坛成立典礼暨回归20周年研讨会，咁正经的研讨会，焦点当然落在各人的讲话当中。不过张建宗的焦点，却落在佢特色“煲冬瓜”之中，十分有香港仔味道，讲歪少少当普通话，香港人听起上嚟好有亲切感，不过唔知在场以普通话为日常语言嘅人，又听唔听得明？ 话说，同场有中联办法律部部长王振民、民主思路召集人汤家骅、一国两制青年论坛召集人何建宗。张建宗讲嘅系自己对“一国两制”及《基本法》的看法，表明建基于“一国”，香港才能拥有“两制”的优势。事实上，“一国两制”、“港人治港”、高度自治是对国家和对香港最有利的安排。 司长其实经已好努力，比晒啲“北京卷舌”音出嚟，不过一时错咗音调，一时就错咗声母韵母。好似第一句咁，原本系“我今天非常荣幸出席一国两制青年论坛的成立典礼暨回归二十周年研讨会”，青年论坛读咗“青炼麟坛”，回归变咗“许龟”，研讨读“yan逃”，高兴亦读“胶兴”，后面…	2017-04-30	头条日报	即时港闻		474
中环出更：张建宗烂透普通话 “两制”变“两鸡”	http://orientaldaily.on.cc/cnt/news/20170501/00176_101.html	香港回归后，唔少官员喺公开发言时都会以普通话发言，但并唔系每个官员都擅长两文三语，所以经常闹出笑话。政务司司长张建宗（小肥张）寻日出席一个回归二十周年研讨会时，就罕有以普通话致词，佢提到“一国两制”时竟然讲成“一国两鸡”，佢嘅普通话真系“技惊四座”。 发言后段全用港式普通话 小肥张发言时话《基本法》规定香港嘅制度，保障香港嘅一国两制、港人治港同高度自治，对保持香港繁荣稳定有重要作用。佢又认为市民要全面认识《基本法》，先可以发挥作用。 短短十分钟嘅发言，小肥张似乎都讲得相当吃力，一开始时佢尝试“字正腔圆”读出正确读音，但“两制”仍然读成“两鸡”，我很“高兴”亦读成“胶兴”；而发言去到尾段，佢似乎处喺半放弃情况，港式普通话全面进场，已经去到几乎听唔明嘅程度。讲到尾，为免语言成为两地官员之间嘅隔阂，小肥张似乎要尽快练习普通话先得喇！ 卓妮	2017-05-01	东方日报	港闻	卓妮	417
张建宗普通话之烂媲美崔世安	http://www.singpao.com.hk/index.php?fi=news1&id=30152	【成仔手记】 澳门特首崔世安后继有人？政务司司长张建宗昨日出席一个论坛时，正经上台发言正常不过。不过大家或者未能好清楚听明司长在讲甚么，皆因他的普通话相当“本土”，“一国两制”读成“一国两鸡”，普通话之烂，可以媲美普通话“出名”的崔世安。 “一国两制”读成“一国两鸡” 政务司司长张建宗昨日出席“一国两制青年论坛成立典礼暨回归20周年研讨会”时，用普通话致辞。他讲到自己对一国两制同《基本法》看法时，短短一句“香港使用港元，内地使用人民币”，“港元”就讲成“港人”，“内地”就成了“你地”，当提到“一国两制”又读成“一国两鸡”，“重要”讲成“中腰”。不过张建宗在10分钟的发言中都算是尽力，不时卷舌希望营造北京腔味道。 张建宗发言实在是提到，香港建基于“一国”，才能拥有“两制”的优势，有“一国之利”，也有“两制之便”，又形容让香港市民对《基本法》有充分和全面的认识，是落实“一国两制”的重要基础。	2017-05-01	成报	要闻港闻		445
Executive日记——崔世安普通话叻咗好多呀﹗	http://hd.stheadline.com/news/columns/0/20170510/564884/	全国人大委员长张德江去咗澳门访问，前日同澳门特首崔世安见面，好多人焦点放咗喺崔世安嘅普通话，因为佢嘅普通话一直都被人觉得真喺“好普通”，不过Kelly就发现佢今次讲得有进步啵！张德江听崔世安汇报工作，崔世安讲：“对委员长莅临思叉(视察)澳门，表示热烈的欢迎，感谢委员长一直以来对澳门特别行政区的关心和致辞(支持)，贱年来(今年来)在中央关怀领导下……”，间中发音唔多准，但小妹听得明，整体而言，比佢以往搞笑嘅普通话发言大有改进，佢应该下咗唔少苦功！ Kelly Chu	2017-05-10	头条日报	专栏		247
苦练普通话19载 盲汉当上电台主持	http://paper.wenweipo.com/2017/05/21/WY1705210002.htm	“亲爱的朋友们，很高兴又与大家见面了”四川成都双林路一个安静的房间内，电台主持人韩宇戴着墨镜日前进行录音。与其他主持人不同的是，朗读时，韩宇的左手一直抚摸着讲稿--他是盲人。韩宇从15岁开始练习普通话，考取普通话一级乙等证书，终于在34岁这一年，圆了自己的电台主持梦。 两岁那年，韩宇被诊断出“视网膜母细胞瘤”，从此双目失明。因为看不见，他无法跟同龄的小朋友一起玩耍，家里会“说话”的半导体收音机成了唯一的玩伴。 一次，韩宇鼓足勇气拨到电台。“我是一个盲人，想向主持人请教一些普通话的问题。”就这样，韩宇意外拜师。 愿用声音给更多人快乐 20岁那年，韩宇从特殊学校的按摩专业毕业，在一家盲人按摩店当起了按摩师，不过，他的主持梦仍未间断。得知当主持人要有普通话证书，2004年，21岁的韩宇报名参加了普通话等级考试。最终，韩宇以96.3分的成绩考取了一级乙等普通话证书。 追梦十余年后，机遇来了。今年…	2017-05-21	文汇报	神州大地		582
政Whats噏：张建宗弃用烂普通话再销基本法 (15:07)	http://m.on.cc/nc/hknews/20170528/20170528150747lc.html	【on.cc东网专讯】有领导人昨日(27日)讲完公务员要学习及掌握《基本法》、港府要推广一国两制之后，政务司司长张建宗(小肥张)今日立即发表网志，表示“一国两制是不折不扣的拥有两个世界最好的东西”，又话要“让香港市民对《基本法》有充分和全面的认识”，完全系拾人牙慧、擦鞋擦出面！ 小肥张今日以“繁荣稳定：一国之利、两制之便”为题发表网志，指《基本法》是香港特别行政区的宪制性文件，亦是国家的全国性法律，建基于“一国”，才能拥有“两制”的优势。他又指，“一国两制”为香港带来实质的好处，就是不折不扣的拥有两个世界最好的东西。 小肥张又指，让香港市民充分和全面认识《基本法》，是落实“一国两制”的重要基础，政府会继续加强推广《基本法》的工作，促进对《基本法》明确而广泛的认识。 其实，有关《基本法》和一国两制的议题，小肥张唔止讲过一次。他上一次出席一个回归20周年研讨会时，就曾经以极烂的普通话推广“一…	2017-05-28	东方日报	即时港闻		506
普通话口语测试浸大新学年试行倘通过考核豁免修课程	http://stepaper.stheadline.com/news_content.asp?newsid=F02194.txt&newscat=F&newsdate=2017-06-02	不少大学均设普通话课程，浸会大学更要求学生须在相关课程取得及格始能毕业，有学生指课程艰深，担心难以及格而影响毕业。浸大校长钱大康称，检讨后新学年将试行入学普通话口语测试，考核学生普通话沟通能力，若通过即可获豁免修读课程。另外，浸大教务议会日前通过议案，取消计算课堂出席率，即学生再不会因出席率低而被禁考试。 现时浸大所有本科生，必须修读一个占三个学分的普通话课程，或一个不计学分的普通话课程，才达毕业要求，但前者被指课程拼音知识艰深，难获高分，后者须有七成出席率和通过指定测试。学生担心因难达标而延后毕业，或者对总成绩平均积点（GPA）有影响，认为须改变规定，甚至取消。 浸大校长钱大康接受本报访问时表示，上任以来一直有留意学生的诉求，遂委派新任副校长（教与学）周伟立，于教务议会关注相关议题。“我们现有几个新方案，其中一个是设立入学普通话测试，考核学生普通话沟通能力，不评等级，若学生通过即符合普…	2017-06-02	星岛日报	教育	李咏潼	864
普通话证书	http://124.243.200.100/a.php?f=20170529/xy-2.txt	香港回归祖国，转眼二十年过去。想起回归初期，职场掀起一股学习普通话热潮，我有几位同事就是在此情况下去做兼职，工余到各机构教普通话，按小时收取报酬，后因发展顺利，他们干脆辞去了正职。 我当时有位朋友，其父是本港著名作家，她却是不大喜欢写作，非常活跃有闯劲，同时打着几份工，我知道她其中一份工是在某学院教普通话。她一次次鼓动我也去考个普通话证书，说本事不怕多，万一不想熬夜做报馆了，教教普通话也可混口饭吃。 她是正宗广东人，都可考个一级乙等，我暗忖自己好歹是从北京走出来，要考也不会差到哪里去吧？拿着她帮我买来的应考资料熟悉了一下，便胆粗粗去中文大学应考。面对几位国家级普通话水准的考官，我一直蛮自信，但考到最后，见男考官低头在桌面猛画圈，心里犯起了嘀咕，他在圈什么呢？ 一段时间后，拿到证书，一看是二级乙等，大为泄气，找时间与朋友详细讨论，她怪我不听话：“叫你去上几课纠正一下发音你不去，你平时讲几种…	2017-05-29	大公报	新园地	慕秋	598
浸大新学年试行普通话口语测试 倘通过考核豁免修课程	http://www.stheadline.com/inews-content.php?cat=a&nid=105664	不少大学均设普通话课程，浸会大学更要求学生须在相关课程取得及格始能毕业，有学生指课程艰深，担心难以及格而影响毕业。浸大校长钱大康向《星岛日报》表示，检讨后新学年将试行入学普通话口语测试，考核学生普通话沟通能力，若通过即可获豁免修读课程。另外，浸大教务议会日前通过议案，取消计算课堂出席率，即学生再不会因出席率低而被禁考试。 现时浸大所有本科生，必须修读一个占三个学分的普通话课程，或一个不计学分的普通话课程，才达毕业要求，但前者被指课程拼音知识艰深，难获高分，后者须有七成出席率和通过指定测试。学生担心因难达标而延后毕业，或者对总成绩平均积点（GPA）有影响，认为须改变规定，甚至取消。 浸大校长钱大康接受本报访问时表示，上任以来一直有留意学生的诉求，遂委派新任副校长（教与学）周伟立，于教务议会关注相关议题。“我们现有几个新方案，其中一个是设立入学普通话测试，考核学生普通话沟通能力，不评等级，若…	2017-06-02	头条日报	即时港闻		858
罗志鹏：老外普通话“讲得几好”	http://124.243.200.100/a.php?f=20170619/zm-35.txt	对于香港回归前后的变化，有11年香港证券从业经验的罗志鹏深有体会。“1995年第一次去香港，当时一句广东话都唔识，但同的士司机讲英文就可以”。到上世纪90年代末期，罗志鹏因频繁在港工作，故开始学习粤语，但“那时的士司机仍听不懂我讲乜”。 2000年后，罗志鹏逐渐发现，从机场搭的士“我都唔需讲话，司机就直接用普通话问我去哪里”。 类似的细微变化，在香港金融圈亦同样上演。“80年代，香港市场多为外资机构，90年代后，香港外资机构中的中方人员参与度明显提高，如今香港中资金融机构的占比不断提高。” 罗志鹏还留意到，早先在香港路演都用英文介绍项目，但过去10年讲普通话的机会越来越多，甚至香港外资行老外的普通话“也讲得几好”。他笑言：“我广东话都未学好，大家却开始讲普通话了！” （记者 倪巍晨）	2017-06-19	大公报	中国特稿		392
推普先锋许耀赐：本土抬头排拒普通话	http://premium.mingpao.com/cfm/Content_News.cfm?Channel=gb&Path=235794594567/ghk1.cfm	【明报专讯】特区政府于1998年将普通话列为中小学核心课程，又鼓励学校以普通话教中文，并拨款推广，各式各样学习普通话的机构应运而生。20年过去，在政府推动下，港人的普通话应该不再“普通”，但香港普通话研习社创办人许耀赐慨叹，近年学习普通话的港人大减，他的学生人数由高峰期的每年1.7万，急跌至近年的每人3000多，跌幅逾八成。 许耀赐认为，在自由行带动下，港人接触普通话的机会大增，但近年本土意识抬头，将语言与政治挂钩，有人为“维护”广东话，拒用普通话，反而导致港人普通话水平停滞不前。 这种微妙的张力也出现在日常用语，近年香港的文字媒介出现不少内地用词，一些港人认为有关词汇蚕食本港独有的语言文化。但本地学者认为，两地语言及文字互相影响相当正常，港人毋须担心本身的语言消失而拒绝接触其他语言。明报记者 曾映妹 “1970年代的香港不流行普通话，一讲普通话便被人标签为『左仔』。”10岁由福建来港的…	2017-06-24	明报	港闻		1865
积极学习普通话 语言优势胜英美	http://paper.wenweipo.com/2017/06/26/CH1706260006.htm	沪港虽同属金融中心，但由于处于不同发展阶段，对金融人才的需求亦有细微差异。吴云鹏认为，香港是高度分工的金融市场，专才型的金融从业人员，更有用武之地，但若是在上海发展，则需在专才与全才间寻求平衡。 “由于长时间在一个金融生态健全的环境中，将全部精力投入专业，香港同行刚来上海，肯定会感到不适应。”吴云鹏说，内地市场的确很大，但也要摈弃惯性思维，若常常以国际惯例作比较，很难做好。 吴云鹏认为，香港金融制度完备，金融人才高度分工，与纽约、伦敦相似，在香港市场，很容易找到某一个领域能力很强的专才，但上海金融中心较香港起步晚，制度、法规建设相对滞后，若仅仅是某一金融领域的专才，或有所欠缺，降低成功概率，最好既精通专业技能，又理解监管意图，更擅于和客户打交道。 在吴云鹏看来，相对于外国金融人才，香港人才更具优势，“尤其是1997年回归后，很多港人积极学习普通话，了解内地文化，在上海的适应性，要远远好于…	2017-06-26	文汇报	内地		449
浸大新增普通话能力测试	http://orientaldaily.on.cc/cnt/news/20170627/00176_074.html	【本报讯】浸会大学设有普通话修课要求，学生须修毕课程兼考试合格才可毕业，学生一直争取撤销规定。浸大教务议会昨通过新增普通话测试，学生通过测试便可豁免修读普通话课程，否则仍须修读课程并通过考核，新措施下学年实施。有学生批评新测试巧立名目“换汤不换药”，要求校方尊重学生意愿，尽快取消普通话毕业要求。 据了解，所有未完成普通话毕业要求的学生均可参与新的普通话测试，每名学生只可报考一次，评核学生的普通话表达能力，不用考拼音。校方亦有意改善现有课程，浸大将开设新课程“实用普通话”，改善课程不足，学生可选修此课程满足普通话毕业要求。 学生投票九成支持取消修课 浸大发言人表示，新测试以口语沟通和聆听能力为主，测试合格的学生即等同符合普通话毕业要求；测试不合格的同学，须修读一项重新设计、以口语沟通为主的实用普通话课程，完成课程并通过考核后等同符合普通话毕业要求。大学会参考学生在新的普通话测试成绩数据，再…	2017-06-27	东方日报	港闻		496
【主席访港】彭丽媛访安老中心广东话问好 院友普通话赞彭“很漂亮” 16:50	http://news.mingpao.com/ins/instantnews/web_tc/article/20170630/s00001/1498811542950	国家主席习近平夫人彭丽媛今早到黄竹坑东华三院赛马会松朗安老综合服务中心探访长者，跟长者聊天，闲谈间彭不时以简单广东话问好，彭还参观中心的创新科技器材，如职业训练治疗等仪器，又为正在做击拳训练的长者身旁打气，长者即向她挥拳回应。 彭丽媛车队今早10时半左右到达安老综合服务中心，传媒只可在外拍摄车队进出，政府新闻处其后发放探访短片，片段中见到彭丽媛于中联办副主任殷晓静、特首夫人梁唐青仪及劳工及福利局长萧伟强等陪同下，参观安老中心的设施和活动，又跟中心内的长者聊天和做手工。 该安老综合服务中心正使用不同的创新科技以加强安老服务，彭丽媛先参观长者如何使用电脑玩“找不同”以作训练，又观看正接受职业治疗训练的长者如何打击拳，她主动以广东话向长者问好，又拍手为长者打气，称赞对方“你好棒”，哄得长者十分高兴，更向彭挥拳回应。 彭丽媛又到安老综合中心的住宿设施“朗逸居”参观，其间与院友闲谈，有女院友见到彭…	2017-06-30	明报	即时港闻		566
阿里推首款智能音箱 售573元 接收普通话指令 控制家居购物	http://premium.mingpao.com/cfm/Content_News.cfm?Channel=ea&Path=168425395105/ecm1.cfm	【明报专讯】亚马逊、Google、苹果等在智能音箱市场的竞争愈趋激烈之际，阿里巴巴昨日在北京发布旗下人工智能（AI）实验室研发的第一款智能语音终端设备“天猫精灵X1”。这是阿里巴巴首次向家庭用户推出的消费级AI产品，内置阿里巴巴第一代人机交流系统AliGenie，能听懂普通话语音指令，实现智能家居控制、语音购物、手机充值、音乐播放等功能。阿里巴巴昨早段股价升约1%。 昨早段股价升1% 这款被喻为“中国版Echo”的产品将于8月8日发售，售价499元人民币（约573港元），相比349美元（约2722港元）的苹果HomePod、180美元（约1404港元）的亚马逊Echo及129美元（约1006港元）的Google Home，售价低了不少，且较内地厂商酷狗等推出的同类产品价格更低。 阿里巴巴标榜它是“你的小秘书”、“娱乐和家电管家”，具备音频内容播放、讲笑话、查运势、玩游戏、查天气、找手机、…	2017-07-06	明报	经济		1222
普通话学会十年耕耘	http://orientaldaily.on.cc/cnt/lifestyle/20170710/00298_003.html	培侨中学于2006年成立普通话学会，十年来积极发掘精英，在朗诵、演讲、主持、辩论、话剧各项比赛大放异彩，而在校内所有庆典上，也可见普通话专才的身影。历任普通话学会的干事，在有限资源下，发挥个人及团队的最佳能力，带领普通话学会进步。普通话学会于2016年成功组织20位同学参与自创话剧《青葱岁月》，在圣诞节期间到北京进行交流，活动成功发掘同学在导演、编剧、写作、表演、后台各方面的才华，师生均受益良多。 营业资讯	2017-07-10	东方日报	保健．教育		218
张建宗领誓普通话“港腔浓”	http://stepaper.stheadline.com/news_content.asp?newsid=A04009.txt&newscat=A1&newsdate=2017-07-02	新一届特区政府昨日在香港回归二十周年的时刻，在国家主席习近平监督下宣誓就职，由于事前曾作彩排，新班子宣誓的表现不俗，没有“甩辘”情况，当中略嫌带领宣誓的政务司司长张建宗的普通话“太普通”，带有强烈“香港口音”外，较引人注目的是新班子中的唯一女性、食物及卫生局局长陈肇始。她昨日身穿粉红色的套装，在一众身穿深色西装的男同僚中，犹如“万绿丛中一点红”，甚为出众，正如特首林郑月娥在宣布官员任命后所形容，陈肇始“为这个男性官员为主的团队，增添一点女性的温柔”。 林郑向习主席逐一介绍 香港回归祖国二十周年暨香港特别行政区第五届政府就职典礼昨日早上九时，在湾仔会议展览中心举行。特首林郑月娥及一众主要官员随国家主席习近平一起进场，标志典礼正式开始，在众人肃立唱国歌后，林郑月娥及一众官员先后在习近平监督下宣誓，再由正式就任特首的林郑月娥为其“智囊团”行政会议成员监誓。宣誓仪式完毕后，林郑月娥及习近平分别致…	2017-07-02	星岛日报	港闻		745
历届特首的普通话	http://124.243.200.100/a.php?f=20170713/xk-7.txt	迄今香港产生过四位特首。各位特首都曾在市民面前“秀”过他们的普通话。 除了曾荫权，其他三位的祖籍都不是广东，家乡话在他们掌握普通话时可多少提供一点便利。董建华和梁振英的普通话虽带乡音，但表达流畅，用语准确到位。年轻时曾在蛇口听过梁振英演讲，对他的普通话表达及口才都留下了深刻印象。 曾荫权是地道香港人，普通话对他来说可谓是另一种语言。好在他出身公务员受过课程培训，语音语言虽生硬些，但没出过大问题。他自己说过学普通话很是刻苦，家里到处放着字典，方便他随时翻查。 林郑月娥的普通话能力，在多场回归活动中已有表现。看得出她那种“好打得”的精神也体现在普通话学习中，感到她一次比一次说得好，一次比一次轻松、自然。 对特首和香港高层官员这些政治人物来说，普通话语音只要不影响沟通，不至产生误会就算过关了，重要的是表达的内容不要出错。 就好比“窝心”一词在香港的理解和使用，好在“七一”领导人与香港官员会面时…	2017-07-13	大公报	小公园	凡心	592
康梁崔古式普通话	http://premium.mingpao.com/cfm/Content_Column.cfm?Channel=vy049&Path=101055297183/vy049.cfm	【明报文章】七月一日看电视，政务司长带领众司长用普通话宣读就职誓词，发觉他的普通话水平接近崔世安或古天乐。未来上京述职，可能需要翻译协助，才能够与国家领导作深入沟通。此事令我想起清末的康有为和梁启超，他们都是广东人，官话（即普通话）不灵光，未能与皇帝畅谈，亦从未受重用。 光绪帝励精图治，对康有为梁启超的维新思想十分欣赏，曾经分别破格召见两人。康有为对人说，光绪接见自己时，两人谈了很久。不过，当时的刑部主事张元济却指出，当天多名大臣在廷外等候皇帝接见时，康有为对荣禄大谈变法，荣禄听得皱眉，有些话根本听不懂。光绪单独接见其他大臣都很长时间，唯独接见康有为，不到十分钟就结束了。到底谈了什么，别人无从知晓。 十七天后光绪接见梁启超，他的普通话水平相信接近崔世安或古天乐，令光绪听得很费劲。他将“考”说成“好”，将“高”说成“古”等，光绪要不断问他说什么，梁启超有时还用手比划帮助表达。依惯例，被皇帝…	2017-07-18	明报	作家专栏	陈汉森	602
退休女医生遭电骗失327万人仔警通缉操普通话男子 17:25	http://std.stheadline.com/instant/articles/detail/455467-%E9%A6%99%E6%B8%AF-%E9%80%80%E4%BC%91%E5%A5%B3%E9%86%AB%E7%94%9F%E9%81%AD%E9%9B%BB%E9%A8%99%E5%A4%B1327%E8%90%AC%E4%BA%BA%E4%BB%94+%E8%AD%A6%E9%80%9A%E7%B7%9D%E6%93%8D%E6%99%AE%E9%80%9A%E8%A9%B1%E7	电骗党又得手！一名73岁退休女医生堕假冒执法人员电话骗案，损失327万人民币。警方正追缉一名操普通话的年约30至40岁，约1.65米高，肥身材的中国籍男子。 73岁姓陈的退休女医生，早前接获一个“入境处”电话，并转驳至一名自称内地执法人员的男子，指陈涉嫌与一宗刑事案件有关，她其后按指示到内地开设银行户口，并分别8次将共327万元人民币存入该户口。 陈其后再收到一名男子来电，要求她到湾仔轩尼诗道将银行户口的保安编码器交予一名年约30至40岁说普通话的男子，她将保安编码器交给对方后离去。陈其后怀疑受骗，遂于昨日到湾仔警署报案。 警员初步调查后，将案件列作以欺骗手段取得财产，交由湾仔警区刑事调查队第六队跟进，正追缉一名操普通话的年约30至40岁，约1.65米高，肥身材的中国籍男子。 建立时间：08:37 更新时间：17:25	2017-07-16	星岛日报	即时香港		421
【四议员DQ】刘小丽：不认同与林郑无关 质疑蒋丽芸普通话宣誓无被告 10:28	http://news.mingpao.com/ins/instantnews/web_tc/article/20170717/s00001/1500258771063	梁国雄、罗冠聪、刘小丽及姚松炎4人上周五（14日）被法庭裁定丧失立法会议员资格。刘小丽指，不认同案件与新任特首林郑月娥无关，她表示建制派多名议员涉在宣誓时加入政治讯息亦无被提告，又质疑案件是选择性提控。 刘小丽今早接受港台节目时说，她完全不接受案件与新上任特首林郑月娥无关的说法，指案件由上届政府提告，林郑月娥亦在上届政府中，又指林郑月娥上任后有空间商讨抽起案件，惟她没有这样做，刘表示，可见新届政府是换人不换路线，她指若不向林郑月娥施压，政府只会继续赤裸裸打压议员。 刘小丽表示，民建联议员蒋丽芸宣誓时以普通话读出誓辞，质疑她为何没被提告，指普通话或有隐含意思，刘小丽又举出民建联议员黄定光和工联会议员陆颂雄作例子，指他们宣誓时亦加入政治讯息，怀疑政府为什么不向他们提告。刘小丽说，提告本身不中立，指新特首若希望做到中立，就是抽起案件。 刘小丽说，希望集合议会和民间的力量向政府施压，她指若市民不…	2017-07-17	明报	即时港闻		593
政情：小肥张认普通话唔掂要恶补	http://orientaldaily.on.cc/cnt/news/20170721/00176_134.html	外号“小肥张”嘅政务司司长张建宗早前出席研讨会时罕有以普通话发言，之不过就畀人发现普通话相当普通，包括把“一国两制”讲成“一国两鸡”等，过去主责劳工福利议题嘅小肥张寻日同传媒聚会时话，自己以前无机会使用，又承认普通话发音不足，依家有上紧堂，强调会虚心学习，呼吁大家多啲同佢讲普通话。 为官长达四十多年嘅小肥张出晒名系“工作狂”，佢提及公务生涯嘅点滴时话，由于公务宴会多数喺周末进行，试过一日内换三套衫，包括早上着波鞋，夜晚着“踢死兔”西装，而且仲要喺公厕度换添。 冀明年重开“公民广场” 另一方面，小肥张都有回应政界关注嘅多个问题，包括何时重开俗称“公民广场”嘅政府总部东翼前地，以及副局长及政治助理人选，小肥张话当局正研究开放政总东翼前地一事，希望明年可以达成呢个意愿，佢又期望立法会十月复会时，各政策局嘅副局长同政助都齐人。	2017-07-21	东方日报	港闻		399
被指普通话差 张建宗：已聘请老师补习 21:12	https://topick.hket.com/article/1862434/	政务司司长张建宗4月出席一国两制青年论坛致辞，普通话“技惊四座”，将“一国两制”时读成“一国两鸡”、重要读成“中腰”。他今日会见传媒时指，明白自己在普通话发音上有不足，会虚心学习。 他表示，自己不是完全不懂普通话，但以往无机会使用，又透露，已聘请老师补习，尽量改善，又呼吁各界多与他说普通话，甚至著记者跟他用普通话进行访问，让他可以练习。 张建宗出名“工作狂”，每日工作10多小时，星期六、日都会回办公室工作。他笑言，现时比当劳福局局长时早起15分钟，即由5时45分提早至5时半，7时多已回到办公室，直到晚上8时离开。据了解，每日早上8时半的会议，张建宗在会议前已读毕所有报章及电邮。 张亦是问责官员“楼王”之一，他与太太在香港持有9个物业，包括7个住宅单位、2个商业单位，他称所有物业是由其妻拥有，并不是他，因为要交税才申报。被问到妻子有否投诉他工作太过忙碌时，他称对方是他的最大后盾，笑言妻子手…	2017-07-20	经济日报	即时社会		526
独行落马洲管制站 操普通话4岁男童疑遭遗弃 09:02	http://news.mingpao.com/ins/instantnews/web_tc/article/20170728/s00001/1501202871274	一名年约4至5岁姓廖男童，昨午约2时被职员发现独自在落马洲支线管制站徘徊，警员接报到场，将廖童送院检查，案件暂时列作“对所看管儿童或少年人虐待或忽略”处理，交由边界警区刑事调查队第2队跟进。 廖童操普通话，身高约1米，瘦身材，圆面型，被发现时身穿一套白色长袖上衣、白色长裤及蓝色拖鞋；警方呼吁任何就案件有资料提供的市民，尽快与任何一间警署联络或致电36614400或36614052与人员联络。	2017-07-28	明报	即时港闻		210
普通话基准试考起教师 聆听辨误4成不达标 16:34	https://topick.hket.com/article/1868089/	考评局今日(28日)公布最新教师语文能力评核（基准试）报告，普通话达标考生整体上升，去年只有3成人达标的“死亡之卷”卷一聆听与认辨，今年有近6成人达标，但在聆听辨误方面，不少人未能识别“老板没架子，他特好人”、“这么夸张地减肥，我才不干呢”、“房价到了这种环境”等，都是不符合普通话规范的说法。 报告又提到，考生反而错将一些合符普通话规范的说法，判为错误，例如“就喝水对付对付嘛”、“没咱打工的甚么事儿”等。 报告指，由此可见，要学好普通话，除了语音外，言语的实际运用也不可忽略。 据规定，参加语文能力评核的考生，须全部考卷达3级或以上，才达到语文能力要求而可任教相关科目。今年普通话考生有1,954人，普通话科卷一聆听与认辨及卷二拼音表现较逊色，达标人数分别是59.8%及55.2%。 有考生在普通话卷一听辨词语部分，将“嫡子”(dí zi) 误作“笛子”(dí zi)，又把“筹措”(chóu …	2017-07-28	经济日报	即时社会		927
【特稿】塞生精通普通话 谈“带路”头头是道	http://paper.wenweipo.com/2017/01/03/ED1701030015.htm	同日另一环节是在大使馆中举行晚宴，由“未来之星”同学跟塞国大学生进行联谊交流。当地学生不仅能用一口流利普通话作沟通，对“一带一路”倡议也比较熟悉，他们指出“一带一路”推行以后，流入塞尔维亚的中国资金明显增加，亦制造大量就业机会，经济及民生均见改善。 晚宴开始前当地学生与未来之星学生代表分别致辞，其中，未来之星学生先以现学现卖的塞语向现场同学打招呼，继而以流利英语向卢山及一众大使馆职员致谢，感谢他们促成交流。他又感谢未来之星同学会连日来的努力，使交流活动顺利举行，让一众同学于行程中获益良多，深信这些交流将能加深香港跟他国青年的友谊，达至民心相通。 另一边厢，塞国同学亦礼尚往来，以普通话向一众“未来之星”讲解当地历史及文化情况，其中一人更是早有准备，以广东话讲出“你好吗？”，让香港同学们印象深刻。 信“带路”促当地经济 同学们于大使馆内一起聚餐，两地同学珍惜时间互相交流，塞尔维亚学生杜山（D…	2017-01-03	文汇报	南北直通车		1079
廉署请助理廉政主任 懂普通话有优势	ttp://skypost.ulifestyle.com.hk/%E6%B8%AF%E8%81%9E/%E6%96%B0%E8%81%9E%E4%BA%8C%E6%A2%9D/20170116/001/%E5%BB%89%E7%BD%B2%E8%AB%8B%E5%8A%A9%E7%90%86%E5%BB%89%E6%94%BF%E4%B8%BB%E4%BB%BB%20%E6%87%82%E6%99%AE%E9%80%9A%E8%A9%B1%E6%9C%89%E5%84%AA%E5%8B%A2/2	廉政公署正展开新一轮招募，署方现正招聘约20至30名助理廉政主任。 【晴报专讯】廉政公署正展开新一轮招募，署方现正招聘约20至30名助理廉政主任，起薪点为20,345港元，申请人需在文凭试或会考中取得5科2级或E级成绩，或具同等学历，相关职位顶薪点为为36,295港元。同时，署方强调能操流利普通话会是有利条件，受聘者会以合约形式雇用，合约为期2年半，若期间表现良好，合约结束时可另获25％约满酬金。 职责方面，署方指相关职位主要职务包括协助调查贪污及相关罪行投诉、搜集证据、搜查及参与拘捕行动，并需作财务分析，接受枪械训练，甚至是卧底行动。	2017-01-16	晴报	港闻		295
廉署聘30名助理廉政主任 识普通话有利 (13:08)	http://m.on.cc/nc/hknews/20170115/20170115130839lc.html	【on.cc东网专讯】廉政公署正招募助理廉政主任，入职月薪达20,345港元，为署方薪级表的第4点，对比其他纪律部队，仅低于警务处初入职警员的月薪薪酬，今次廉署计划招聘20至30名助理廉政主任。 廉署刊登招聘广告，聘请执行处助理廉政主任一职，最高薪酬点为36,295港元，即是署方薪级表第14点。申请人必须具备包括在香港中学文凭考试5科考获第2级或同等或以上成绩，或具同等学历，或在香港中学会考5科考获第2级/E级或以上成绩，或具同等学历，及符合语文能力要求，即在香港中学文凭考试或香港中学会考中国语文科和英国语文科考获第2级或以上成绩，或具同等学历。 除了学历要求，申请人亦需要在遴选过程中参加体能测试及视力测试，并能书写畅顺中、英文及操流利英语和粤语，以及熟识香港情况。当中署方特别在语文能力强调，能操流利普通话会是有利的条件，未知是否因新入职者或要参与跨境贪污案件调查工作有关。 除调查工作外…	2017-01-15	东方日报	即时港闻		520
阿娇Deep V同赖弘国进场 律师用普通话主持婚礼	https://www.am730.com.hk/news/%E5%A8%9B%E6%A8%82/%e9%98%bf%e5%ac%8cdeep-v%e5%90%8c%e8%b3%b4%e5%bc%98%e5%9c%8b%e9%80%b2%e5%a0%b4-%e5%be%8b%e5%b8%ab%e7%94%a8%e6%99%ae%e9%80%9a%e8%a9%b1%e4%b8%bb%e6%8c%81%e5%a9%9a%e7%a6%ae-154586	钟欣潼（阿娇）换上一袭Deep V粉色花裙现身，一面幸福的挽著赖弘国步出露天场地。一对新人现身时，全场欢呼，其后律师用普通话主持婚礼，二人宣誓后，并与在场亲友逐一合照，成个婚礼非常简约。	2018-12-19	am730	娱乐		95
【普通话教与学】声调不留意 随时“借新娘”	http://paper.wenweipo.com/2018/12/18/ED1812180013.htm	不少香港同学都知道，普通话的一、四声是最容易混淆的声调。你有没有试过把最常说的“弟弟”说成“低低”、把“杯子”说成“被子”？又或者，你有没有听过别人把“我接个电话”说成“我借个电话”？说起这第一声的“接”字和第四声的“借”字，我甚至在一节谈论婚礼的课堂上，听到过把“新郎接新娘”说成了“新郎借新娘”。 普通话跟广州话一样，属于声调语言，声调改变了，听起来就变成了另一个字。我们在说话的时候，只要声调变一点，就足以对语意造成很大的影响了。今天就趁着这个机会，跟大家分享两个在普通话课堂里发生的小插曲吧！ 下单变下蛋 笑爆同学嘴 在一次介绍自己工作内容的课堂上，一位学员就如是说：“我的工作主要是直接给香港的客户下蛋，下好蛋之后呢，我就把这些蛋发给美国的总公司，美国那边收到蛋之后呢” 你猜，他是来自一家农场呢，还是贸易公司呢？ 而在一节小学生的课堂里面，同样的趣事又发生在了一个小朋友的身上。两个小朋…	2018-12-18	文汇报	新闻透视眼		910
《大黄蜂》北京活动 John晒半桶水普通话 (11:13)	http://m.on.cc/nc/ent/20181215/20181215111354en.html	【on.cc东网专讯】荷里活上位女星希莉辛菲（Hailee Steinfeld）与前摔角巨星John Cena等日前来港旋风式宣传后，昨日抵北京继续宣传新片《大黄蜂》（Bumblebee）。 昨晚她们就出席发布会及红地毡与《变形金刚》（Transformers）内地粉丝见面。曾学普通话四年的John在发布会上不忘大晒普通话全程回答记者提问，不过似乎他的普通话好有限，回答问题时有点“词穷”。他说：“《大》有好多娱乐性，故事非常好，演员非常好，导演非常好，非常好的团队，非常好的电影。我们喜欢娱乐，《大黄蜂》娱乐！” 刚刚在港度过22岁生日的希莉表示好荣幸加入这部大片好兴奋但其实冇乜压力，她说：“其实大部分时间都系同一个网球亘动！”意指在特技全绿幕对住空气做戏。	2018-12-15	东方日报	即时娱乐		352
《MAMA》宋仲基晒普通话 Wanna One先夺奖 (19:31)	http://m.on.cc/nc/ent/20181214/20181214193141en.html	【on.cc东网专讯】今年是韩国年度音乐盛事《MAMA音乐颁奖礼》的十周年，先后于本周一及三于韩国及日本开锣，并于今晚移师亚博举行最后一站，连续第二年担任主持的宋仲基出场后，先用韩文打招呼，之后又用普通话说：“大家好，你们好久不见，我是宋仲基。” 他指能够出席这个世界性的盛会感到很光荣，今年亦同样有很多粉丝和顶级的艺人出席，他又问台下粉丝：“知道今晚有甚么艺人出席吗？”台下即有粉丝大嗌“防弹少年团”，宋仲基即表示自己也很喜欢，又指《MAMA》是不惧失败，会一直尝试挑战，并约定大家今后10年也与《MAMA》一起集合这份热情。 而Wanna One的Triple Position成员姜丹尼尔、朴佑镇及金在焕先拔头筹，勇夺“最佳小分队”，三人上台领奖时表示没想过会得奖，不忘感谢粉丝的支持。女歌手Heize勇夺“最佳歌唱Solo歌手”。Seventeen凭《A-TEEN》获“最佳OST”。IZO…	2018-12-14	东方日报	即时娱乐		431
康明凯精通普通话 倡对华强硬	https://china.hket.com/article/2229313	康明凯在出任加拿大外交官时，曾派驻北京和香港，卸任后亦关心中国政治和人权问题，他精通普通话，曾多次批评中国的政策，主张对华采取强硬的态度。 公开资料显示，2003至2016年，康明凯在加拿大驻华使馆、及驻港总领馆任外交官。 他还曾在联合国总部担任联合国开发计划署的战略通讯专家。 去年加入国际危机组织 去年2月，康明凯加入国际危机组织担任东北亚高级顾问，主要研究中国、日本和朝鲜半岛的外交事务和全球安全问题等。据悉，他的工作地点位于国际危机组织在香港的办公室，经常进出内地。 与康明凯相识多年的加拿大媒体《多伦多星报》（The Toronto Star）编辑赵淇欣昨撰文称，康明凯对中国的政治与人权问题感兴趣，康明凯曾经表示很喜欢国际危机组织的职位，这让他可以频繁旅行和与人交流。 赵淇欣称，康明凯是一个“痴迷”中国的人，“他想留在中国，继续学习有关这个国家的更多内容。” 康明凯的Twitter最…	2018-12-13	经济日报	中国		632
“张晋就怕蔡少芬说普通话”辣兴老婆 粉丝︰娘娘息怒	https://skypost.ulifestyle.com.hk/article/2228301/	蔡少芬（Ada）与张晋一向是娱乐圈其中一对模范夫妇，可是近日却有点反高潮，张晋拍片取笑爱妻的普通话不济，竟登上微博热搜第一名，Ada即霸气出Po反击︰“有人命不久矣”。两人一唱一和惹来网友热议，粉丝直指二人隔空耍花枪劲搞笑；亦有人认为Ada真发火，非同小可！ 张晋现时在内地忙于宣传新片《叶问外传︰张天志》，近日在网上却疯传一段他嘲讽太太蔡少芬普通话太烂的短片，片中的张晋在餐厅叹火锅时表示︰“别个都说的，天不怕地不怕，就怕重庆人说普通话。喝别个（骗人），我看是天不怕地不怕，就怕蔡少芬说普通话。”见他一脸认真，似乎与Ada结婚十年依然听不明太太讲的普通话。 蔡少芬身为内地爆红古装剧《甄嬛传》的霸气娘娘，一向随性的她当然不会放过丈夫，前晚在微博转贴此文登上热搜榜第一名的截图，并留言︰“看来有人命不久矣！”并附有一个嬲嬲表情符号。 “港普”带有魔性 其实，Ada在内地拍剧掘金多年，但她的普通话一…	2018-12-12	晴报	娱乐		730
张晋自爆：最怕蔡少芬说普通话	http://www.singpao.com.hk/index.php?fi=news4&id=90201	武打电影《叶问外传：张天志》将于12月21日圣诞、元旦双诞档期登陆内地各大院线，昨日主创张晋重返家乡重庆宣传电影，畅聊生活里“不惧打败”的经历。 此次重返家乡重庆，张晋与老乡们畅聊电影幕后故事和入行20年的心路历程，透露自己九岁开始练武术，小时候每天都会跑嘉陵江大桥，为了功夫演员的梦想，一直不懈拚搏：“我为了梦想而离家，中途也曾想过放弃，但这个念头很快就过去了。尤其是从运动员转行做反串替身时，觉得自己离梦想好像很近又好像很远，但后来坚持下来是因为如果离开，就更没有梦想了，只有留下，才有机会碰到梦想。” 坚定追求目标吸引女神 出名“宠妻狂魔”的张晋聊到爱妻蔡少芬，自爆最怕蔡少芬说普通话，而在大家让其模仿时，张晋幽默回应：“你们大概是不想我回香港了。”引得现场爆笑不断。面对男同学提问如何才能娶到蔡少芬这样的女神，张晋幸福满满地应答：“这一点我很幸运，但也是因为我一直坚定地追求自己的目标而吸引…	2018-12-12	成报	娱乐		437
张晋怕老婆讲普通话登热搜榜第一 蔡少芬嬲嬲：有人命不久矣	http://www.stheadline.com/inews-content.php?cat=f&nid=273886	蔡少芬和老公张晋结婚多年，一直是娱乐圈中的模范夫妻。近日网上就流传一段张晋嘲笑老婆蔡少芬普通话水皮的片段，更迅即登上微博热搜第一位，“嬲嬲猪”的蔡少芬昨（10日）晚在微博就转贴热搜榜截图，霸气地说：“看来有人命不久矣！”并附有一个嬲嬲表情图案，兼写上“￥&$#+%”。 虽然蔡少芬在内地搵食多年，但她的普通话一直讲得麻麻。她早前在内地剧《海上嫁女记》一幕边驾驶边rap的戏份，片段播出后引来网民热议，笑指听到“起鸡皮”，蔡少芬翻看时，亦表示忍不住笑。网上近日就疯传一段片段，见张晋一边打边炉，一边说：“天不怕地不怕，就怕蔡少芬说普通话！”	2018-12-11	头条日报	即时娱乐		280
张晋怕老婆讲普通话登热搜榜第一蔡少芬嬲嬲：有人命不久矣 12:36	http://std.stheadline.com/instant/articles/detail/885085-%E5%A8%9B%E6%A8%82-%E5%BC%B5%E6%99%89%E6%80%95%E8%80%81%E5%A9%86%E8%AC%9B%E6%99%AE%E9%80%9A%E8%A9%B1%E7%99%BB%E7%86%B1%E6%90%9C%E6%A6%9C%E7%AC%AC%E4%B8%80+%E8%94%A1%E5%B0%91%E8%8A%AC%E5%AC%B2%E5%AC	蔡少芬和老公张晋结婚多年，一直是娱乐圈中的模范夫妻。近日网上就流传一段张晋嘲笑老婆蔡少芬普通话水皮的片段，更迅即登上微博热搜第一位，“嬲嬲猪”的蔡少芬昨（10日）晚在微博就转贴热搜榜截图，霸气地说：“看来有人命不久矣！”并附有一个嬲嬲表情图案，兼写上“￥&$#+%”。 虽然蔡少芬在内地搵食多年，但她的普通话一直讲得麻麻。她早前在内地剧《海上嫁女记》一幕边驾驶边rap的戏份，片段播出后引来网民热议，笑指听到“起鸡皮”，蔡少芬翻看时，亦表示忍不住笑。网上近日就疯传一段片段，见张晋一边打边炉，一边说：“天不怕地不怕，就怕蔡少芬说普通话！”	2018-12-11	星岛日报	即时娱乐		280
【花絮】太古施铭伦秀流利普通话	http://paper.wenweipo.com/2018/12/11/FI1812110014.htm	太古A（0019）与太古地产（1972）新任主席施铭伦（Merlin Swire）今年7月正式上任，为太古大股东施怀雅家族第六代传人，昨日他首度与传媒会面时表示，自己于内地工作了5年，能操流利普通话，又称未来会协助集团搞好内地及香港的伙伴关系。 趁圣诞节快到，太古系昨晚于金钟太古广场总部举办了一个小型酒会与传媒聚一聚。以往太古大股东施怀雅家族成员都只是当系内上市公司非执董，今次施铭伦担正主席，自然要面对传媒。 施铭伦昨与传媒闲聊时透露，他于1997年加入集团，曾任可口可乐上海总经理及厦门太古飞机工程行政总裁，于内地工作了5年，如今可以讲流利普通话，还即场用普通话讲了几句。施铭伦亦介绍了系内各项业务近况，坦言最感困难的是国泰（0293）泄露客户资料。 不少名门都喜爱收藏艺术品，于牛津读古典学的施铭伦都有收藏喜好，尤其偏爱古希腊钱币，至今已储了约30个钱币。	2018-12-11	文汇报	财经		411
【普通话自由谈】两地文化共融 循序推普教中	http://paper.wenweipo.com/2018/12/11/ED1812110007.htm	“普教中”一直是香港学界的热门话题，前两年教育局公布香港教育大学受语常会委托的“普教中”研究报告，当中显示“普教中”对研究个案学生的中文科学习没有负面影响，但报告批评学校对“普教中”重视程度、师资与教学策略等均有缺失，令“普教中”成效未能发挥。 “普教中”的前景在理论上十分理想，但在现实中总遇到一些执行的困难。如何看待“普教中”的未来，它的出路在何方？笔者认为，可以从两个大方面理解。 第一，也是最重要的，是需要社会各界共同创造良好的社会氛围，让两地更加融洽。港人要放开胸怀，接纳和包容自己的祖国，内地人也要尊重和适应香港独特的文化环境，只有这样，才能够带动香港年轻一代愿意从心出发，迈开一步，脚步走到了内地，心紧密贴近祖国，还怕普通话学不好吗？ 第二，中小学前线教师对“普教中”这个概念的理解，会直接影响他们的教学理念。笔者认为，“普教中”不是一刀切，强制要求所有的中文课程都要用普通话作为教学…	2018-12-11	文汇报	新闻透视眼		1062
绫野刚开微博 流利普通话自称“刚子” (01:24)	http://m.on.cc/nc/ent/20181210/20181210012420en.html	【on.cc东网专讯】日本艺人近年都积极开拓大中华市场，纷纷开设微博同内地粉丝沟通。近排同男星山田孝之及内田朝阳组成乐队“THE XXXXXX”夹Band的36岁男星绫野刚，最近亦开设了微博，并拍片向内地网民打招呼。 绫野刚以流利普通话自我介绍，又叫内地的网民可以称呼他“刚子”，十分搞笑。他又留言表示：“希望成为中日影视圈的桥梁。”此外，昨日他又上载在机场的短片，未知是否预告将现身内地宣传。	2018-12-10	东方日报	即时娱乐		208
特稿：湾区青少年普通话竞技 两港童膺“金牌大使”	http://paper.wenweipo.com/2018/12/10/CH1812100020.htm	昨日，“2018粤港澳大湾区朗读大使活动暨青少年征文比赛”在东莞举行总决赛和颁奖典礼。来自香港的60多位参赛选手分为幼儿园组、小学组和综合组参赛，其中，幼儿园组和小学组分别获得一等奖，成为此次朗诵大赛的“金牌大使”。 在连续两日的总决赛现场，来自香港明慧国际幼稚园（太子分校）的吕总璞凭借《爸爸的鞋印》荣获幼儿园组特等奖，被评为荣誉“金牌大使”； 基督教香港信义会禾峰信义学校的学生郭沛霖带来朗诵作品《颠倒话》，荣获小学组特等奖“金牌大师”的称号。 值得一提的是，来自美国的15岁女孩快乐罗杰斯用纯正流利的中文朗诵了两首古诗词，成为总决赛现场关注的焦点，赢得大家的一致称赞。 15岁的快乐罗杰斯的父亲吉姆罗杰斯是美国著名投资专家，量子基金创始人之一，他非常看好中国发展，近年来对中国经济给予很多正面评价和投资。 为了更好的投资中国，吉姆罗杰斯和太太，从两个女儿出生开始，便给她们请了中文家教老师。 …	2018-12-10	文汇报	内地		496
湾区普通话竞技 两港童膺“金牌大使”	http://124.243.200.100/a.php?f=20181210/zm-21.txt	9日，“2018粤港澳大湾区朗读大使活动暨青少年征文比赛”在东莞举行总决赛和颁奖典礼。来自香港的60多位参赛选手分为幼儿园组、小学组和综合组参赛，其中，幼儿园组和小学组分别获得一等奖，两名港童成为此次朗诵大赛的“金牌大使”。值得一提的是，来自美国的15岁女孩快乐罗杰斯用纯正流利的中文朗诵了两首古诗词，成为总决赛现场关注的焦点，赢得大家的一致称赞。\大公报记者 胡若璋东莞报道 记者获悉，在连续两日的总决赛现场，来自香港明慧国际幼稚园（太子分校）的吕总璞凭藉《爸爸的鞋印》荣获幼儿园组特等奖，荣誉“金牌大使”；基督教香港信义会禾峰信义学校的学生郭沛霖带来朗诵作品《颠倒话》，荣获小学组特等奖“金牌大师”的称号。值得一提的是，在本次比赛的幼儿园组别当中，香港代表队拿到了12个二等奖。其中，香港圣保罗堂幼稚园（北角）的5岁陈卓谦告诉记者，此前在香港比赛期间获得了冠军，这次来东莞参加比赛做了幼儿园组的…	2018-12-10	大公报	中国		1171
湾区普通话竞技 15岁美国女流利中文“声入人心”	http://news.wenweipo.com/2018/12/09/IN1812090030.htm	【文汇网讯】(香港文汇网 记者 胡若璋)9日，“2018粤港澳大湾区朗读大使活动暨青少年征文比赛”在东莞举行总决赛和颁奖典礼。来自香港的60多位参赛选手分为幼儿园组、小学组和综合组参赛。值得一提的是，来自美国的15岁女孩快乐罗杰斯用纯正流利的中文朗诵了两首古诗词，获得好评如潮。 记者获悉，快乐罗杰斯的父亲吉姆·罗杰斯是美国著名的投资专家，量子基金创始人之一，他非常看好中国的发展，近年来对中国经济给予很多正面评价和投资。 为了更好投资中国，罗杰斯和太太从两个女儿出生开始，便给她们请了中文家教老师，让她们在牙牙学语时便开始学习地道中文。 总决赛现场，快乐罗杰斯用一口流利的普通话征服了在场师生和家长。她表示，此次非常开心受邀到东莞参加朗诵表演，畅游在中文的曼妙海洋中。快乐罗杰斯的古诗词朗诵，落落大方的台风引得台下好评如潮。其中，在朗诵唐诗之前，快乐罗杰斯还和全场的同学们互动起来，邀请大家猜一猜…	2018-12-09	文汇报	即时新闻		710
仰慕张艺谋喜欢王家卫润娥努力学普通话望多拍华语片 16:45	http://std.stheadline.com/instant/articles/detail/883303-%E5%A8%9B%E6%A8%82-%E4%BB%B0%E6%85%95%E5%BC%B5%E8%97%9D%E8%AC%80%E5%96%9C%E6%AD%A1%E7%8E%8B%E5%AE%B6%E8%A1%9B+%E6%BD%A4%E5%A8%A5%E5%8A%AA%E5%8A%9B%E5%AD%B8%E6%99%AE%E9%80%9A%E8%A9%B1%E6%9C%9B%E5%A4	韩国女团少女时代成员润娥到澳门出席“第三届澳门国际影展暨颁奖典礼”记者会，同是活动明星大使，但相比之前尼古拉斯基治的记者会的安排，润娥不单迟了一个钟，数十内地和香港记者更要挤在一个小房间内，记者会连咪高峰和扩音器都欠奉，相机快门声比润娥的声音更大。 润娥表示已多次来澳门，很喜欢澳门的夜景，希望放假时都可以来玩。她说今届影展有不少好电影，直言很仰慕张艺谋导演，很期待欣赏对方的新戏《影》，而且韩片《忏悔》入围了竞赛单元，她寄望有好的成绩，指韩国有很多优秀的导演和演员，希望大家多多支持。 润娥最近忙于拍摄新戏《EXIT》，她指是这是一部灾难片，不是打来打去的动作片，她需要时时奔跑，会以大家未见过的形象出现。润娥无论是歌手还是演员身份都获过不少奖项，她感谢大家对她的厚爱，令她有动力做得更好，她现在正努力学习普通话，希望中文进步后多拍华语片，她指之前都拍过华语片和综艺节目，内地演员都对她非常照顾，…	2018-12-08	星岛日报	即时娱乐		457
仰慕张艺谋喜欢王家卫 润娥努力学普通话望多拍华语片	http://www.stheadline.com/inews-content.php?cat=f&nid=272167	韩国女团少女时代成员润娥到澳门出席“第三届澳门国际影展暨颁奖典礼”记者会，同是活动明星大使，但相比之前尼古拉斯基治的记者会的安排，润娥不单迟了一个钟，数十内地和香港记者更要挤在一个小房间内，记者会连咪高峰和扩音器都欠奉，相机快门声比润娥的声音更大。 润娥表示已多次来澳门，很喜欢澳门的夜景，希望放假时都可以来玩。她说今届影展有不少好电影，直言很仰慕张艺谋导演，很期待欣赏对方的新戏《影》，而且韩片《忏悔》入围了竞赛单元，她寄望有好的成绩，指韩国有很多优秀的导演和演员，希望大家多多支持。 润娥最近忙于拍摄新戏《EXIT》，她指是这是一部灾难片，不是打来打去的动作片，她需要时时奔跑，会以大家未见过的形象出现。润娥无论是歌手还是演员身份都获过不少奖项，她感谢大家对她的厚爱，令她有动力做得更好，她现在正努力学习普通话，希望中文进步后多拍华语片，她指之前都拍过华语片和综艺节目，内地演员都对她非常照顾，…	2018-12-08	头条日报	即时娱乐		457
苦练普通话 祖儿唱游内地校园	http://orientaldaily.on.cc/cnt/entertainment/20181208/00282_025.html	容祖儿日前先后在上海及成都为新国语专辑举行校园音乐会，席间与学生分享制作心路历程，表示这几年一直苦练普通话：“既然是国语专辑，就要把国语练好，才是对专辑和歌迷最大的尊重。”谈到新歌《长大》，她说：“我们总以为自己已经长大，然而回头看，其实很多事情可以处理得更成熟，但人生没有完美。”并学懂接受不完美的自己，活得舒服、自在是其处世哲学。	2018-12-08	东方日报	本地娱乐		169
普通话女子葵涌天后宫外自焚 烧焦头发送院 13:03	https://news.mingpao.com/ins/%e6%b8%af%e8%81%9e/article/20181204/s00001/1543899227897/%e6%99%ae%e9%80%9a%e8%a9%b1%e5%a5%b3%e5%ad%90%e8%91%b5%e6%b6%8c%e5%a4%a9%e5%90%8e%e5%ae%ae%e5%a4%96%e8%87%aa%e7%84%9a-%e7%87%92%e7%84%a6%e9%a0%ad%e9%ab%ae%e9%80%81%e9%9	一名操普通话的女子于葵涌天后宫门外自焚，警员和救护员接报到场，将女子送往玛嘉烈医院治理。 事发于今早11时半，一名庙宇职员发现涉事女子于庙内踱步，遂上前询问是否需要协助，岂料女子突然情绪激动，冲出庙外，并取出火机焚烧自己的头发。警方接报到场，劝喻女子不要伤害自己，女子大呼“我不想活下去”，继而以火机点燃衣服及手机。 救护人员到场，将女子送往玛嘉烈医院治理。据悉，女子部分头发被烧焦。 防止自杀求助热线 生命热线：2382 0000 撒玛利亚防止自杀会：2389 2222 社会福利署：2343 2255 明爱向晴轩：18288	2018-12-04	明报	即时港闻		329
操普通话女子葵涌天后庙烧头发衣服自焚大声呼叫“我不想活” 12:18	http://std.stheadline.com/instant/articles/detail/879676-%E9%A6%99%E6%B8%AF-%E6%93%8D%E6%99%AE%E9%80%9A%E8%A9%B1%E5%A5%B3%E5%AD%90%E8%91%B5%E6%B6%8C%E5%A4%A9%E5%90%8E%E5%BB%9F%E7%87%92%E9%A0%AD%E9%AB%AE%E8%A1%A3%E6%9C%8D%E8%87%AA%E7%84%9A+%E5%A4%A7%E8%81	葵涌道天后庙一名女子自焚。事发在今早，据初步了解，一名年约30岁、操普通话的女子燃点打火机焚烧头发、衣服及手机，并大声呼叫“我不想活”。职员见该名女子情绪激动，于是报警。警员及救护员接报到场，将事主送往玛嘉烈医院救治。	2018-12-04	星岛日报	即时香港		111
操普通话女子葵涌天后宫烧头发衣服自焚大声呼叫“我不想活” 12:18	http://std.stheadline.com/instant/articles/detail/879676-%E9%A6%99%E6%B8%AF-%E6%93%8D%E6%99%AE%E9%80%9A%E8%A9%B1%E5%A5%B3%E5%AD%90%E8%91%B5%E6%B6%8C%E5%A4%A9%E5%90%8E%E5%AE%AE%E7%87%92%E9%A0%AD%E9%AB%AE%E8%A1%A3%E6%9C%8D%E8%87%AA%E7%84%9A+%E5%A4%A7%E8%81	葵涌道天后宫一名女子自焚。事发在今早11时半，据初步了解，一名年约30岁、操普通话的女子燃点打火机焚烧头发、衣服及手机，并大声呼叫“我不想活”。职员见该名女子情绪激动，于是报警。警员及救护员接报到场，将事主送往玛嘉烈医院救治。	2018-12-04	星岛日报	即时香港		115
【普通话教与学】听歌记韵母 学生易共鸣	http://paper.wenweipo.com/2018/12/04/ED1812040013.htm	甲：“我说b p，你说m f、b p” 乙：“m f” 甲：“b p” 乙：“m f” 我无意中在YouTube上看了一个叫做《脱口秀》的节目，是欧阳靖的一个现场Freestyle表演。其中有一段说到他在纽约学中文的时候，中文老师教他学习汉语拼音，第一节课让他读“b p m f”，第二节课也是让他读“b p m f”，到了第三节课，那个老师发现欧阳靖上课不是很投入，于是就换了一个方法，一个适合欧阳靖的教学方法，也就是本文开头的那段rap对话了。 易学拼音 活跃课堂气氛 看完短片后我就想，这个方法也不错呀，学生既可以学好拼音，又可以活跃课堂气氛，不会觉得枯燥了。于是我就在拼音的教学中，特别是学韵母的时候，我会穿插看歌曲的视频环节。 普通话汉语拼音的韵母总共有39个，如果随意写一个韵母让学生读出来，或是随意读一个汉字，让学生判断是哪一个韵母，对普通话能力初级或中级的学生来说，都是比较困难的。…	2018-12-04	文汇报	新闻透视眼		1060
普通话为澳洲使用最广泛社区语言	http://news.wenweipo.com/2018/12/03/IN1812030042.htm	【文汇网讯】据中新网援引澳洲网报道，一本名为《多语言悉尼：城市报告》的新书中指出，中国普通话已经取代悉尼的阿拉伯语和墨尔本的希腊语，成为澳洲最大城市中使用最广泛的社区语言。 三成悉尼人在家不说英语 据报道，在澳洲，悉尼是语言最丰富的城市，35.8%的悉尼人在家说英语以外的语言，墨尔本人和澳洲其他地区民众，该比例则分别为32.3%和20.8%。 从2011年至2016年，悉尼说普通话者的人数增加了71%。数据指出，普通话使用者占悉尼人的4.7%，占墨尔本人的4.1%。 除了普通话外，在悉尼使用最广泛的社区语言是阿拉伯语(4%)、粤语(2.9%)、越南语(2.1%)以及希腊语(1.6%)。 此外，墨尔本人使用各语言的比例为：希腊语(2.4%)、意大利语和越南语(2.3%)以及粤语(1.7%)。 数据显示，Regents Park是悉尼语言最多样化的郊区之一，生活在那里的民众有1/4只说英语。…	2018-12-03	文汇报	即时新闻		1337
章子怡母校中央戏剧学院来港招生 普通话须达能沟通水平 13:34	https://news.mingpao.com/ins/instantnews/web_tc/article/20181201/s00001/1543640391195	国家教育部“内地部分高校免试招收香港学生计划”明年新增7间院校，合共110间院校，新增院校包括演艺界摇篮的中央戏剧学院等。该校招生代表说，面试要求学生具有一定普通话水平。 会展今日起一连两日举行内地教育展，章子怡等著名影星的母校中央戏剧学院今年首次参加免试招生。该校教务处招生办主任张斐然表示，暂不设固定录取名额，学生须参加统一面试，内容包括朗诵、跳舞等项目，普通话水平亦须达“能沟通的程度”，之后会按表现与内地生分开取录。 有兴趣入读中央戏剧学院的黄同学今年读中六，她自言不抗拒面对人和镜头，又认为香港演艺空间有限，内地发展空间则较大。 从广东移居香港的杨同学认为，内地院校数目较多，加上刚参与学校社际戏剧后对表演有兴趣，故有意将中央戏剧学院作为首志愿。 另一所内地著名艺术学院中央音乐学院预计取录约10名香港学生，不限学科，有意报读考生须通过听力和演奏考核，招生代表指取录主要看学生潜能。 有关…	2018-12-01	明报	即时港闻		503
新疆拍剧 温家伟斗车苦练普通话 (01:32)	http://m.on.cc/nc/ent/20181201/20181201013210en.html	【on.cc东网专讯】艺人温家伟现正为无线新剧《法证先锋IV》演出及主持《搵食饭团》，与此同时最近他亦到了新疆沙漠拍摄一部有关赛车的湖南卫视剧集，他饰演赛车手，导演大赞他形象与角色非常合适。今次是继他在新加坡拍摄后的另一新挑战，因普通话不好，他要讲英语及普通话对白，而同场的演员及工作人员全都是内地人，他全程要用普通话跟他们沟通，对他练普通话有很大帮助，他笑言：“每日拍摄完自己用普通话成功点餐真系好开心！” 温家伟大赞当地食物好正，但大呻好冻：“日头同夜晚温差大，日落后气温会降到零下十几度，真系好冻！”他拍完新疆戏分后，就赶回香港拍摄其余《法》的戏分，之后他会再到宁波及上海继续拍摄这部内地剧，他很感谢《法》剧组的体谅及合作，令他可以抽身到内地拍剧。	2018-12-01	东方日报	即时娱乐		338
【普通话自由谈】“走狗”可以骂人 也可比赛娱人	http://paper.wenweipo.com/2018/11/27/ED1811270007.htm	前两天在街上看到一张图文并茂的招贴，“走狗”两个大字映入眼帘，乍一看，还以为是在骂人呢。因为“走狗”一词常用作贬义，比喻受人豢（huan）养，为（wei）虎作伥（chang）的人。可细阅内文才知道是想寻找狗的主人。 关于“走狗”一词，《现代汉语学习词典》有两种解释：其一是指猎狗，也是“走狗”的本义。《史记．越王勾践世家》中就有“飞鸟尽，良弓藏；狡兔死，走狗烹”之说，这里的“走狗”是指猎狗。其二是比喻被人豢养，受人驱使作恶的人。 可见“走狗”一词的这两个义项均不适宜作为该招贴的标题。根据内文的意思，标题改为“失狗待领”较为恰当。 追溯（su）“走狗”一词的历史发展，你会发现古时候“走狗”还是供人娱乐的游戏。《战国策．齐策》就有相关记载：“临淄（zi）之中七万户其民无不吹竽、鼓瑟、击筑、弹琴、斗鸡、走狗、六博、踏鞠。”“走狗”活动或许类似现在广受欢迎的赛猪、赛马吧。至于有没有赌博成分，就不得…	2018-11-27	文汇报	新闻透视眼		1021
D&G创办人普通话致歉	http://www1.hkej.com/dailynews/article/id/1999843/	意大利著名时装品牌D&G（Dolce&Gabbana）创始人班纳（Stefano Gabbana）在Instagram与网友吵架时，其聊天内容被截图曝光，引起辱华风波。班纳周五与另一名始创人杜嘉（Domenico Dolce）拍摄道歉短片在新浪微博播放，并用普通话说“对不起”，惟大量网友不收货。 两人在短片中表示，对中国的热爱一如既往，对于之前有关表达所犯下的错误，“我们必须表达歉意，我们绝对不会忘记这次的经历及教训，这样的事情也绝对不会再发生。” 香港连卡佛货品下架 继中国电商平台集体下架D&G商品后，风波也延烧至香港，百货商连卡佛（Lane Crawford）23日已把D&G的货品下架，解释这是为了“尊重顾客”，连卡佛内地及网上销售也下架。 有内地网民23日直播自己到上海静安区恒隆广场的D&G店铺，对店员咆哮“DG滚出中国”示威，《环球时报》指摘这是假爱国，呼吁店员报警。	2018-11-24	信报	两岸消息		431
时事考题：普通话笔试成绩略降	http://premium.mingpao.com/cfm/Content_News.cfm?Channel=gb&Path=202214852466/gfv1_er.cfm	【明报专讯】“普教中”引发社会讨论中小学该如何提升学生普通话水平。有致力培养学生普通话兴趣的机构，综合自身举办的普通话测试数据，评估香港学生普通话水平。该机构总结两年的数据指出，2017/18中学生的普通话能力有进步，幼稚园学生亦有改善，如不少孩子懂得用普通话回应“老师早安”或“午安”，惟小学生在笔试的成绩略有下降。调查机构的高级项目主任蔡昕珉表示，小学生在认读字词和多音字的知识较弱，导致笔试成绩下降。香港资助小学校长会名誉主席梁兆棠认为，笔试成绩差或与科技影响有关，“（学生）不会很深入记住事物，考笔试时涉及记住拼音，还有声调”，认为学生或因此考不到高分。 试回答以下问题： 1. 试圈出文章首句中“言”字部的字。 2. 蔡昕珉认为小学生哪两方面的知识较弱？ 3. 判断下列句子是否与文章内容相符，对的ˇ，错的×。 a) 梁兆棠认为小学生笔试成绩差是因为学生懒惰。 （ ） b) 是次调查数据…	2018-11-23	明报	教育		738
【D&G涉辱华】两创办人拍片普通话说“对不起” 内地网民拒接受：“中国，你赚不起！” 16:48	https://news.mingpao.com/ins/instantnews/web_tc/article/20181123/s00004/1542961479676	意大利时尚品牌Dolce & Gabbana（D&G）设计师兼创办人加巴纳（Stefano Gabbana）疑发表辱华言论，引起内地发起杯葛，天猫、京东等各大网购平台将该品牌下架，亦有意大利中国留学生到米兰门市示威。D&G今午在微博发表道歉声明，加巴纳与另一创办人Domenico Dolce在影片中以普通话说：“对不起”。 除了加巴纳的言论引来不满外，D&G日前一段《起筷吃饭》广告同样被批评歧视华人文化，引起中国内地一片抵制声音。 加巴纳和Dolce在影片中先以意大利语致歉，配以中文字幕。他们说，经过过去数天认真反省，对自己的言行给中国及其人民带来的一切感到悲伤，又指家庭教育他们要尊敬世上不同文化，“面对我们在文化上理解的偏差，希望得到你们的原谅”，他们向全球所有华人致最深歉意。 两人说：“我们对中国的热爱一如既往。无数次的造访，让我们更加深爱中国的文化”，日后将会竭尽全力更加理解及予以…	2018-11-23	明报	即时两岸		697
港童死穴 英文语法弱 普通话拼音难	http://124.243.200.100/a.php?f=20181121/jx-11.txt	香港两文三语教育推行廿年有余，但港人英语和普通话水平有倒退迹象。今年10月EF Education First再次推出世界英文水平调查报告，发现上海的英语能力第五年超越香港，香港英语能力仅为全球第30名。语文推广委员会（GAPSK）则在本月发布中小学生普通话口笔试成绩趋势，发现小学生笔试成绩较去年“肥佬率”上升25%。有专家称，港生学英文多是语法弱，而学普通话多认为拼音难。/大公报记者 汤嘉平 赵凯莹 EF Education First英文水平调查报告囊括88个国家和地区、共130万非英语为母语的人士参与测试。调查是以EF英语能力指标（EF EPI）作为指标分数，测试将以应考者的行业、职级及职能评分。调查发现香港的英语能力仅为全球第30名，熟练程度为“中等”；上海第五年超越香港，更首度被评为“高级”。 学习英语动力减弱 李求恩纪念中学校长赖炳华任多年英语教师，他称，比起二十年前，港人现…	2018-11-21	大公报	教育		3706
幼园生也能讲好普通话	http://124.243.200.100/a.php?f=20181121/jx-13.txt	潘浩钧 K3 2018 香港校际普通话朗诵比赛冠军 浩钧妈妈：我自己的普通话就比较普通，但我又觉得内地与香港关系密切，作为一个沟通的桥梁，学好普通话自然就变得很必要。为此在我两个儿子分别三岁时，我就相继帮他们报了普通话培训班。上了培训班两兄弟都告诉我他们很喜欢学普通话，因为老师教拼音教得很有耐心。平时我也会给他们看普通话节目或者用普通话翻译过来的外国卡通片。	2018-11-21	大公报	教育		200
【普通话教与学】“海南”变“海澜” “n”“l”易混淆	http://paper.wenweipo.com/2018/11/20/ED1811200009.htm	在内地热播的电视娱乐节目《不可思议的妈妈2》中，《甄嬛传》中的皇后娘娘、香港著名艺人蔡少芬带着两个女儿参加了节目的演出。母女三人全情投入，在演出过程中全都要说普通话。至于娘娘和女儿们说的普通话好不好？大家见仁见智。我个人认为她们说得也算不错，基本上能听得懂。美中不足的是有些字音还发得不够准确。 例如，在完成普通话通关考验时，要用普通话读出“上岛必须尝一尝，海南本土清补凉”这句话，娘娘蔡少芬将“海南（nan）”发成“海澜（lan）”，之后又把“椰奶（nai）”发成“椰 lai”。 其实，在平时的普通话教学中，遇到不少同学都有这样的语音错误。他们常常把“n”声母的字音错发成了“l”声母的字音，或者把“l”声母的字音错发成了“n”声母的字音。造成这个发音错误的原因大概有两个：一是发不准“n”、“l”声母的读音，二是习惯性的记音错误。 发音部位方法不相同 首先，有些同学读不准“n”、“l”这两个…	2018-11-20	文汇报	新闻透视眼		1289
李小龙故居复修作中国文化中心 教授中乐普通话 (21:31)	http://m.on.cc/nc/hknews/20181119/20181119213115lc.html	【on.cc东网专讯】一代武打巨星李小龙位于九龙塘的故居，将被业主复修作中国文化中心，教授普通话及中国音乐，最快明年9月开课，日后更可能提供武术课程。拥有该物业的慈善家余彭年的长孙彭志兵表示，因为并无拥有李小龙的肖像权，故不会用李作为慈善基金的宣传。李小龙会会长黄耀强希望作最后努力，争设立李小龙纪念馆。 李小龙故居位于九龙塘金巴伦道四十一号，曾改作时钟酒店(罗曼酒店)。余彭年生前立下遗嘱，将百亿港元遗产全数捐出作慈善用途，慈善信托基金信托人彭志兵表示，由于建筑物已历久失修，故最快在明年农历新年后将占地5700平方呎的建筑物复修，会保留李小龙居住时留下的马赛克外墙。他又指，复修后会改作中国文化中心，教授普通话和中国音乐等课程，每年可培训约400名儿童，日后更可能提供武术课程。 黄耀强指，08年时，余彭春曾与政府商讨在上址建李小龙纪念馆，惟未能达成共识，事隔十年，他希望可担当斡旋角色，会再联…	2018-11-19	东方日报	即时港闻		452
“港式普通话”宣誓闹笑话	http://www1.hkej.com/dailynews/article/id/1992674/	于民国初年在香港土生土长、其后纵横政坛经年的钟士元，纵然面对中外元首游刃有余，成为首位兼享英国大十字勋章（GBE）及香港大紫荆勋章（GBM）两项当地最高荣誉者，荣获“大Sir”之名，但原来他跟不少本地人一样，曾面对难以踰越的“语言障碍”──普通话，更曾因此险在回归典礼上闹出笑话。 江泽民粤语调侃：我听得懂 钟士元在回忆录中提及，自小因少用普通话而不灵光，碰巧香港回归时自己身为首任行政会议召集人，必须带领其他成员在典礼仪式上以普通话宣誓。 “大Sir”忆述早在彩排时，其别扭的发音已引得哄堂大笑，指监誓的首任行政长官董建华更笑得流泪。 他形容其普通话随即引起“广泛关注”，时任广播处长张敏仪更特地赠予录音带，行会同僚方黄吉雯及梁锦松也为其练兵，甚至宣誓当晚仍须在后台把握时间加操，最终成功过关；钟指事后与同场的国家主席江泽民合照留念时，对方竟以广东话调侃：“你啲普通话我听得懂”，自己唯有反以普通…	2018-11-15	信报	财经新闻		707
见普通话女无着裤嘻嘻笑 被告称锤扑包租公自卫 (14:08)	http://m.on.cc/nc/hknews/20181114/20181114140859lc.html	【on.cc东网专讯】天水围村屋劏房79岁租客涉谋杀80岁包租公案，今(14日)在高院续审。负责拘捕被告倪耀侦的侦缉警长出庭作供，他指警方于案发翌日联络到被告，他在警诫下承认：“阿Sir，陈伯(死者陈根兰)用个锤仔想打我，我抢佢个锤仔扑番佢，系佢郁手先，系我杀嘅”。警方之后带被告返新界北警察总部进行录影会面。 控方庭上播放被告与警方会面的录影口供，被告透露在纺织厂任职管工到55岁，退休后移民到印尼，惟不适应当地生活，决定回流返港。案发时他租住涉案的洪水桥田心村村屋单位其中一间细房，另有一间中房由租客张社良租住，业主占用大房。 被告忆述案发日早上，他到快餐店食早餐及晨运散步后回家，在房内换衫期间，死者突然拍他房门，他开门问“咩事？”死者即用粗口骂他：“X你老母呀，你周围唱X我，话我滚女，话我搞女人”。他反问：“咁你有冇做吖？我无周围唱，净系同阿张讲，我话老伯好咸湿，一搵就搵两件”，死者听罢…	2018-11-14	东方日报	即时港闻		794
【普通话大世界】取材文言 丰富白话	http://paper.wenweipo.com/2018/11/13/ED1811130011.htm	读报与上网常看到一些用法新颖的词语，源于文言，却和文言文原词有着似有若无的连系。有些颇为有趣，有些则去古甚远。 亲子一词，本来指亲生的儿子，现在常被理解做父母与子女的合并称呼，例如父母与子女一起进行的活动，就叫做亲子活动。日本料理中有一种叫丼（即大碗盖饭），亲子丼即是以老嫩的相同肉类搭配佐饭的，常见的有鸡肉与鸡蛋配白饭，或鲑鱼与鲑鱼子配白饭。论名称的“恐怖”程度，亲子丼与香港的煲仔饭可谓不相上下。 黑头，现代汉语词典说是指戏曲中大花脸的一种，因涂了黑脸谱而得名，起初专指扮演包公的角色，后来指偏重唱功的大花脸。在古代，黑头本用来形容头发尚黑的年轻人，杜甫诗句：“远愧梁江总，还家尚黑头。”司马光诗句：“黑头强仕之时，已登廊庙；黄发老成之日，还赏林泉。”黑头和黄发相对，黄发指老人，黑头当然指少年了。少年而能当上高位，古人就称之为黑头公，《晋书》记王珣二十岁便和年纪比他大一倍的谢玄齐名，两人同时…	2018-11-13	文汇报	新闻透视眼		1189
普通话少女热情揸手 郑敬基被误当方力申 (18:40)	http://m.on.cc/nc/ent/20181112/20181112184033en.html	【on.cc东网专讯】人有相似不足为奇，好似陆永就话成日喺街上被认错系6号（陆浩明），仲成日问佢肥妈喺边，真系不知几搞笑！ 而今日郑敬基（Joe）亦都喺网上发文被人认错佢系方力申，仲话两位少女要冲埋嚟同佢握手：“回家前到附近七仔买明早早餐……七仔对面一个妙龄娟好少女，突然冲过来，伸出手要握手，心里暗自欢喜，竟有粉粉丝认得自己……我……！伸出手来以表友善……手，终于紧握着”。 但原来一切都系误会：“女子操纯正普通话说：“『是方力申罢？』手仍然紧握之同时，『我不是！』她以为我耍她『我真的不是！彼此这刻松开了手，她回到她坐在梯级坐着的三个女友人（身边），我自己走回自己家中的同时在想：『我边弗似方力申？』” 最搞笑系虽然Joe已否认，但少女依然觉得似，难怪Joe都好开心：“我内里很开心，只是我怕方力申知道如果有妙龄少女觉得我似佢会超唔开心。因为女子放手时说：『满像方力申的！』无语Sorry#方力…	2018-11-12	东方日报	即时娱乐		475
议事论事/提升普通话教育 巩固香港竞争力	http://117.122.212.150/a.php?f=20211206/lta-1.txt	香港的竞争力，来自“一国两制”的制度保障，来自於高度的法治水平，同时也来自於沟通内地与世界的“超级联系人”角色。要巩固并提升香港的竞争力，需要多方发力，发展传统及新“四大中心”至关重要，而不论是什麽中心也好，关键要素在於人。香港既要进一步提升英文水平，更要提升普通话的应用水平。积极推动普通话在中小学甚至大学的应用与教学、在特区政府内部推动普通话的使用程度，都非常重要。可以这麽说，香港社会的普通话应用程度越高，香港的竞争力也就越大。 熟练掌握“两文三语”有益无害 国务院办公厅12月1日印发《关於全面加强新时代语言文字工作的意见》在“积极推进中华优秀语言文化传承发展”一节中指出：“深化与港澳台地区语言文化交流合作。支持和服务港澳地区开展普通话教育，合作开展普通话水平测试，提高港澳地区普通话应用水平。加大与港澳台地区青少年语言文化交流力度，组织开展中华经典诵读展演、语言文化研修等活动。加强与港…	2021-12-06	大公报	评论	柳 凡	2208
学普通话黄金期：三至六岁	http://124.243.200.100/a.php?f=20181108/gw-54.txt	【大公报讯】记者汤嘉平报道：语文推广委员会（GAPSK）于昨日发布幼稚园、小中学共六千名学生普通话考试成绩及趋势，结果显示中小学生口语成绩有上升趋势，惟小学生拼音知识较弱，笔试“肥佬率”上升25%，典型错误是混淆声调，例如第四声“这”当成第二声“折”。专家建议，孩子应早在三至六岁接触普通话，家长老师应带头讲。 GAPSK表示，参加普通话考试人数有上升趋势，单幼稚园人数就大幅增加27%，听力、描述和表达能力均有提高。中学组整体成绩进步，惟小学组笔试较口试成绩弱，笔试考获卓越级（A级）人数比去年下降15.5%，“肥佬率”则上升25%。GAPSK语文推广委员会高级项目主任蔡昕珉称，笔试中失分最严重为拼音知识部分，典型错误如混淆声调，第四声“这”说成第二声“折”；其次是发音部位不准确，如l、n鼻音部分，“你”好读成“李”好。 专家建议家长带头讲 GAPSK首席顾问张丹称，提早让小朋友接触普通话为…	2018-11-08	大公报	港闻		745
小学生普通话拼音水平略降 认读字词多音字知识弱	http://premium.mingpao.com/cfm/Content_News.cfm?Channel=gb&Path=168512251805/gfa1.cfm	【明报专讯】“普教中”引发社会讨论中小学该如何提升学生普通话水平。有致力培养学生普通话兴趣的机构，综合自身举办的普通话测试数据，评估香港学生普通话水平。该机构指2017/18学年幼稚园学生的普通话能力有改善，中学亦有进步，惟小学生在拼音笔试的成绩略有下降，建议学界更重视语音基础。有小学校监认为，资讯发达令学生较少记住事物，导致学生在填写拼音和声调的笔试成绩较差。 GAPSK语文推广委员会每年定期举行普通话测试，该会称上学年幼稚园和小学各有约2万名学生参加，中学生则有约1.8万名。委员会在2016/17学年和2017/18学年，每学年随机抽取1500个幼稚园样本、1000个小学样本，以及500个中学样本。 幼园生多懂普通话问候 该会总结两年数据指出，小学生整体成绩平稳，惟笔试略有下降。在考核拼音知识的笔试中，2017/18学年考获卓越（90分至100分满分）的人数较2016/17学年下降1…	2018-11-08	明报	教育		774
小学普通话口试 “肥佬”增逾3成	https://paper.hket.com/article/2203431	【本报讯】有调查发现，小学普通话口试考获“肥佬”级别者增逾3成，中学生成绩虽有改善，但整体基础薄弱，常犯错误包括混淆声调、发音部位不准，如“中间”变“中箭”、“找到”变“早到”。 有校长表示，近年学生整体普通话水平已有改善。 GAPSK语文推广委员会定期举办普通话水平考试，早前在两年内随机抽取6,000名考生资料作分析，发现小学生普通话水平略有下降。2017至18年度小学口试考获最佳等级“卓越级”者，虽对比同年升13%，但考获最差成绩“不入等级”、俗称“肥佬率”的考生人数则上升33%，而笔试考获最佳等级人数则下降15.5%，同时“肥佬率”人数亦上升25%。 基础薄弱 “支持”变“字词” 中学生整体成绩改善，2017至18年度口试考获卓越级人数上升13.9%，考获肥佬率人数大跌48%，同年笔试获第二佳等级优良级的人数亦升26.1%，考获肥佬率人数则跌34%。 该会高级项目主任蔡昕珉指，本港…	2018-11-08	经济日报	港闻		695
小学生普通话大倒退	http://orientaldaily.on.cc/cnt/news/20181108/00176_062.html	本港推行两文三语多年，但有教育机构昨日公布香港学生普通话水平状况，却发现被抽样检视的小学生普通话水平有大倒退之危，在拼音知识的笔试环节，小学生本年度考获卓越级（A级）的人数较上年度下跌了一成半，人数由一六/一七年的五百五十六人，下跌至一七/一八年度的仅四百七十人。而且，无论是拼音知识或口试，应试小学生的表现均较前退步，中学生则表现不俗。推广双语教学的人士指出，幼年学生语言基础薄弱，但从小学习有助他们形成语言习惯，而三至六岁是儿童学习语言的黄金时间。 推广普通话及中文教育机构GAPSK，透过辖下考试委员会以随机抽样拣选了一六至一八两个年度共六千名幼稚园及中小学考生，经分析及比较数据后，发现小学生在主要测试拼音知识的笔试，考获卓越级（A级）的人数则下跌了一成半，由上一年度的五百五十六人，下跌至四百七十人，虽然考获优良（B级）的人数有所上升，但考获不入等级即不合格的人亦增加了三成三。在口试方面…	2018-11-08	东方日报	港闻		1197
普通话测试小学生拼音基础弱	http://stepaper.stheadline.com/news_content.asp?newsid=F01120.txt&newscat=F&newsdate=2018-11-08	多年来举办普通话考试的GAPSK语文推广委员会，公布本地学生的普通话水平指标，小学整体成绩与去年相若，但笔试成绩下跌，中学则微升三点八分；学生最常弄错“n”和“l”音，将“李”读成“你”。资助小学校长会名誉主席梁兆棠指，学普通话是大势所趋，倘若师资充足，全面落实“普教中”将水到渠成，但强调主导权应在学校手上。 中学生成绩微升 一七/一八年度有超过五万名幼稚园、中小学学生参加GAPSK普通话考试，GAPSK语文推广委员会整合两个学年的学生数据，并从中抽取六千个学生样本作分析，发现小学生的普通话指数与去年一样，维持在八十五分的水平；中学生则由七十七分，上升至八十点八分。 GAPSK语文推广委员会高级项目主任蔡昕表示，小学生于笔试成绩表现较口试弱，可见拼音知识不足，语言基础薄弱，常见错误包括混淆“n”和“l”音，将“李”读成“你”；中学生则惯常将口语直接翻译，例如照读“惊惊青青”。她建议，社…	2018-11-08	星岛日报	教育	余嘉欣	795
港生普通话成绩有改善 口试成绩较笔试佳	https://www.am730.com.hk/news/%E6%96%B0%E8%81%9E/%e6%b8%af%e7%94%9f%e6%99%ae%e9%80%9a%e8%a9%b1%e6%88%90%e7%b8%be%e6%9c%89%e6%94%b9%e5%96%84-%e5%8f%a3%e8%a9%a6%e6%88%90%e7%b8%be%e8%bc%83%e7%ad%86%e8%a9%a6%e4%bd%b3-149017	教育署于八十年代已将普通话纳入中小学课程，九十年代末更成核心科目，普遍新生代都经过正规普通话训练。而语文学习机构GAPSK语文推广委员会抽取两个年度参与其普通话水平考试的6,000名考生成绩，发现香港幼稚园、中小学生整体口试成绩较佳，但拼音知识相对较弱，部分发音不准确，例如“找到”到读成“早到”；或误将广东话用语当成普通话，例如“逛街”说成“行街”或“去街”。 该机构高级项目主任蔡昕珉认为，考生日常生活中较少用普通话，难免影响发音和掌握声调，建议家长和教师在日常生活中营造学习普通话的环境。	2018-11-08	am730	新闻		260
小学普通话口试 “肥佬”人数增3成	https://skypost.ulifestyle.com.hk/article/2203439/	教育局局长杨润雄曾表示，世界中文发展以普通话为主，但有机构调查发现，小学普通话口试考获“肥佬”级别者增逾3成，虽然中学生成绩有改善，但整体基础薄弱，常犯错误包括混淆声调、发音部位不准，如“中间”变“中箭”、“找到”变“早到”。不过，校长和中文科教师表示，近年学生整体普通话水平有改善，学校亦有营造更多以普通话沟通的机会。 GAPSK语文推广委员会定期举办普通话水平考试，早前在2年内随机抽取6,000名考生资料作分析，发现小学生普通话水平略有下降。2017至18年度小学口试考获最佳等级“卓越级”者，虽对比同年升13％，但考获最差成绩“不入等级”、俗称“肥佬率”的考生人数则上升33％，而笔试考获最佳等级人数则下降15.5%，同时“肥佬率”人数亦上升25％。 中学生整体成绩改善 惟中学生整体成绩改善，2017至18年度口试考获“卓越级”人数上升13.9%，考获“肥佬率”人数大跌48％，同年笔试获…	2018-11-08	晴报	港闻		1021
“支持”读成“字词” 学童普通话试肥佬升25% (14:50)	http://m.on.cc/nc/hknews/20181107/20181107145023lc.html	【on.cc东网专讯】推广中文及普通话教育机构GAPSK今(7日)公布香港学生普通话水平指标，发现参与普通话考试的人数愈来愈多，而小学生在笔试成绩考试考获A级的人数下降了15.5%，而不合格的人数亦上升了25%，另中学生的笔试成绩则有所提升。 该机构考试委员会分析及比较2016至2018年两个年度共6000名幼稚园、中小学考生的数据，发现幼稚园考生的成绩有上升，而小学生整体成绩平稳，笔试(考察拼音知识)则略有下降，在2017至2018年考获卓越级(A级)的人数则较上一年度下跌了15.5%，而考获不入等级，即不合格的人数上升了25%。口试考获不入等级的人数上升了33%。 中学考生的整体成绩有所进步，在2017至2018年于笔试获卓越级(A级)的人数较上一年度上升了近10%，优良级(B级)上升了26.1%，考获不入等级的大幅下跌了34%。 GAPSK语文推广委员会高级项目主任蔡昕珉指，中学生…	2018-11-07	东方日报	即时港闻		671
“支持”变“字词”小学生普通话试不合格上升25% 17:11	http://std.stheadline.com/instant/articles/detail/859033-%E9%A6%99%E6%B8%AF-%E3%80%8C%E6%94%AF%E6%8C%81%E3%80%8D%E8%AE%8A%E3%80%8C%E5%AD%97%E8%A9%9E%E3%80%8D+%E5%B0%8F%E5%AD%B8%E7%94%9F%E6%99%AE%E9%80%9A%E8%A9%B1%E8%A9%A6%E4%B8%8D%E5%90%88%E6%A0%BC%E4%B8	有教育机构今日举行“香港学生普通话水平提升及发展趋势”研讨及发布会，并公布参与该机构举办的普通话考试的学生成绩，发现参与考试的考生人数持续上升，但小学考生的普通话考试成绩却普遍下降，不合格的人数上升了25%。 GAPSK语文推广委员会以抽样形式分别抽取了3000名幼稚园及3000名中小学考生的成绩并进行分析，发现幼稚园考生在聆听能力、描述能力及表达能力方面都有所提升，成绩亦有进步。然而，在小学考生方面，考获A级的人数比上一年度下降了15.5％，而不合格的人数更上升了25%。当中，不少考生会弄错声调，如将“支持”读作“字词”等。 GAPSK语文推广委员会主任蔡昕珉亦指，虽然中学考生在笔试及口试方面整体表现进步，但同样存在混淆发音等问题。	2018-11-07	星岛日报	即时香港		345
语委会调查：中小学生普通话口语佳 拼音声调表现较差 18:27	https://news.mingpao.com/ins/instantnews/web_tc/article/20181107/s00001/1541582159473	有致力培养学生普通话学习兴趣的机构，综合自身举行的普通话测试数据，评估香港学生普通话水平和发展趋势。该研究指，2017/18学年的幼稚园学生在普通话反应能力等方面有改善，中学亦整体进步，惟小学拼音笔试表现略有下降。 GAPSK语文推广委员会在2016/17学年和2017/18学年，每学年在幼稚园抽1500个样本、在小学抽1000个样本，以及在中学抽500个样本。 该委员会总结两年数据，表示小学生的整体成绩平稳，惟笔试略有下降，考核拼音知识的笔试，2017/18学年考获卓越的人数较2016/17学年下降15.5%，考获不入等级的“肥佬”学生上升了25%。口试部分，卓越级虽然上升13%，但考获“不入等级”（不被评级）的人数亦上升33%。 中学组方面，2017/18学年笔试成绩考获卓越级人数较2016/17学年上升0.72%，次一级的优良级亦上升26.1%，考获“不入等级”人数同时下跌34%。…	2018-11-07	明报	即时港闻		740
【普通话教与学】多聆听模仿 放心学拼音	http://paper.wenweipo.com/2018/11/06/ED1811060011.htm	我们学校一直为香港的中小学及幼稚园提供不同种类的课程及活动；在参加课程的学生里，总是少不了普通话拼音的部分。为什么要学习拼音呢？普通话的定义也说得很清楚，其中以北京音为基础音，也就是说没“音”不成话。如果忽略了拼音，说话时南腔北调或存在着地方口音，表达不清晰时就会闹笑话了。 记得有一次，学生学习古诗词《水调歌头．明月几时有》时，词里就有一句“转朱阁，低绮户，照无眠”，学生解释说：“月光转过朱红色的楼阁，低低地挂在雕花的窗户上，照着没有『睡衣』的自己。”他当时也还没有意识到自己把“睡意”说成了“睡衣”。“意yi”是去声，他读了“衣yi”阴平。我告诉他以后，他也是笑得合不拢嘴。 这是由于在拼音中声调上的错误而出现的一个小笑话。普通话里有四个声调，阴平、阳平、上声和去声。 谁不知道把普通话说好就要学好拼音呢！可是拼音看似简单，对于南方人来讲，还是存在着一定困难。在我们根深蒂固的语音系统里，总是…	2018-11-06	文汇报	新闻透视眼		1130
【普通话教与学】多聆听模仿 放心学拼音	http://paper.wenweipo.com/2018/11/06/ED1811060011.htm	我们学校一直为香港的中小学及幼稚园提供不同种类的课程及活动；在参加课程的学生里，总是少不了普通话拼音的部分。为什么要学习拼音呢？普通话的定义也说得很清楚，其中以北京音为基础音，也就是说没“音”不成话。如果忽略了拼音，说话时南腔北调或存在着地方口音，表达不清晰时就会闹笑话了。 记得有一次，学生学习古诗词《水调歌头．明月几时有》时，词里就有一句“转朱阁，低绮户，照无眠”，学生解释说：“月光转过朱红色的楼阁，低低地挂在雕花的窗户上，照着没有『睡衣』的自己。”他当时也还没有意识到自己把“睡意”说成了“睡衣”。“意yi”是去声，他读了“衣yi”阴平。我告诉他以后，他也是笑得合不拢嘴。 这是由于在拼音中声调上的错误而出现的一个小笑话。普通话里有四个声调，阴平、阳平、上声和去声。 谁不知道把普通话说好就要学好拼音呢！可是拼音看似简单，对于南方人来讲，还是存在着一定困难。在我们根深蒂固的语音系统里，总是…	2018-11-06	文汇报	新闻透视眼		1130
港式普通话	http://stepaper.stheadline.com/news_content.asp?newsid=E04166.txt&newscat=E&newsdate=2018-11-06	世界中文报业协会五十周年，在北京举行年会，同时安排了在人民大会堂举行论坛，其中一个环节，邀请了科大讯飞董事长刘庆峰主讲人工智能发展。 科大讯飞以人工智能发展即时传译技术，在深圳上市曾突破千亿元市值。今年内地股市急插等因素，股价向下调整，但刘庆峰早前就强调对公司前景信心十足，准备增持。当日他要往外地公干，但在上机前仍把握机会出席这个全球性的媒体大会。在活动上，科大讯飞还安排了即时的离线翻译，把主讲嘉宾的发言即时变为中文和英文。刘庆峰透露，由于人民大会堂有保安要求，只能用离线设备，否则效果应该更好。 他说，现时科大讯飞的产品已由普通应用发展到图文辨识专业领域，凭着人工智能技术，产品的准确度已超过大学六级水平，同时开始提供智能医疗助理服务，作为全科医生助理，可以看的病症达到三百种，替代家庭医生随访的工作量可以达到八成。而且科大讯飞在不同领域的辨识水平，能够超越国际的学术或商业机构。 语音辨识是…	2018-11-06	星岛日报	副刊		605
许靖韵晒港式普通话 网友狂赞Cute到爆 (14:03)	http://m.on.cc/nc/ent/20181106/20181106140339en.html	【on.cc东网专讯】歌手许靖韵（Angela）日前为内地音乐节目《由你音乐榜样》任表演嘉宾，仲现场演绎由她作曲的《事与愿违》，用歌声讲述“离心”嘅爱情故事。除了唱歌，她仲同好友刘人语拍档，在节目的第二现场变身做主持，她的港式普通话被网友大赞可爱，又话：“小许是在施展仙女魔法吗？这简直是大型圈粉现场！”谈到跟好友刘人语孖住做主持，Angela坦言：“好似回到当初比赛嘅舞台。”	2018-11-06	东方日报	即时娱乐		191
【普通话自由谈】内地“6”潮语 “安利”普通话	http://paper.wenweipo.com/2018/10/30/ED1810300009.htm	内地潮语（湖流用语）层出不穷，多见于网络，多学一两个傍身，绝对有助沟通。潮语一词，本身也是潮流用语，“潮”指时髦、贴近潮流。潮语有时是谐音，如“杯具”（悲剧），还衍生出“餐具”（惨剧）、“洗具”（喜剧）等；也有些潮语，是语音的缩略，如“酱”（这样）就很流行。如果不懂普通话的发音，就不容易知道对方写“神马”（什么）。 “666”连用加强语气 笔者在大学教语文传意，学生主要是内地来港的硕士生，在教的同时，其实也在学。本周的课堂上，出现了“666”和“安利”这两个词。“6”是“溜”（顺溜）或“牛”（厉害）的意思，因其谐音双关，连用三个，就是加强语气。 李斐在去年12月1日香港文汇报的“普通话大世界”专栏就谈过“6”。社交程式上用emoji，输入“打call”的手势就是“6”。反而是“安利”一词，使笔者大感兴趣，于是向学生请教。 “安利”原指直销公司 “安利”，原指“安利公司”（Amway），是…	2018-10-30	文汇报	新闻透视眼		1210
鸟取县官员普通话演讲	http://www1.hkej.com/dailynews/article/id/1967753/	《朝日新闻》记者吉冈桂子26日在推特网披露，日本鸟取县知事平井伸治在日中第三方市场合作论坛上，用普通话演讲，包括一大段介绍当地特产至柯南和鬼太郎等都使用普通话，当时引起“全场响起掌声”，吉冈亦评价“实在太罕见了”。	2018-10-27	信报	两岸消息		109
“崔式”普通话突见进步	http://www1.hkej.com/dailynews/article/id/1973365/	昨日有份在港珠澳大桥开通仪式致词的粤港澳三地领导当中，最大“亮点”当数澳门行政长官崔世安，他的普通话发音向来不甚标准，昨天要当着习主席面前用普通话发言，一众网民食定花生等睇戏。崔特首似乎下过一番苦功，普通话突见进步，当称呼与会领导人时，发音确实比之前准确。崔世安表示，港珠澳大桥展示粤港澳三地紧密合作，具有政治、经济和社会意义，包括丰富“一国两制”方针和实践、弥补过往交通短板（薄弱环节）。澳门特区政府定必积极落实中央各项部署，与粤、港政府携手一道，共同为粤港澳大湾区的发展建设而努力。	2018-10-24	信报	要闻		245
【普通话教与学】找准兴趣点 四式学普通话	http://paper.wenweipo.com/2018/10/23/ED1810230009.htm	笔者曾担任过中小学普通话兴趣班的兼职导师，这些兴趣班以小班形式展开，内容有拼音基础知识、小小配音员、日常会话、朗诵等。在第一堂课上，我通常让同学用普通话作简单的自我介绍，谈谈参加兴趣班的目的、平日的爱好、以前有否学过普通话等话题，这时我基本上已经掌握每个学生的普通话水平。 每班总有两三个同学告诉我，本身对普通话不特别感兴趣，但家长不想让他们放学后无所事事，才帮他们报名。这些没有兴趣学习的同学，在课堂上的表现或多或少会产生负面影响，有的甚至会干扰那些渴望真正学到知识的同学。这时候我就开始思考，如何才能让他们融入课堂？经过尝试，以下四个招式我认为大有成效。 投其所好 弱点纠音 第一招式是投其所好。我发给他们每人一张小纸条，请他们写上最感兴趣或是最喜欢的人、事物、食物等。他们有的喜欢打乒乓球、羽毛球、骑单车，有的喜欢吃各种口味的甜甜圈，有的喜欢打《王者荣耀》、《英雄联盟》等游戏。通过这个方法，…	2018-10-23	文汇报	新闻透视眼		1464
每周1小时 学习普通话	https://invest.hket.com/article/2188774	出任证监会主席6年的生涯中，唐家成称，每周都要抽一小时上普通话课，主要是练习拼音，笑言自己的普通话“进步了少少”。 唐家成昨引用老子在《道德经》的“慎终如始，则无败事”，指自己每日上班都会以谨慎的态度工作，上班前会先阅报了解世界大事，故上班时便能大致知道要处理的事项。 有留意《延禧》 最爱新《三国》 虽然工作忙碌，唐家成亦懂得偷闲。他称，自己爱边做运动边追剧，也有留意近日大热的宫廷剧《延禧攻略》，惟最爱却是新版的《三国演义》。对于卸任后去向，唐家盛称，自己是专业人士背景出身，强调对政治完全无兴趣，“只识专业，不谈政治”，故退休后将全身投入在体育学院及教委会的公职工作。 临别在即，唐家成向记者送上自己最爱的“幸运曲奇”，并祝各位身体健康。	2018-10-19	经济日报	金融		368
唐家成自爆证监6年密练普通话	http://www1.hkej.com/dailynews/article/id/1969822/	证监会主席唐家成6年任期今天（19日）届满，周六开始由雷添良接棒。唐家成昨天与传媒茶叙时，引用《老子．道德经》的“慎终如始，则无败事”自况，指6年来“每日上班都好似第一日返工”的心态，战战兢兢。任期完结总有不舍，他又感谢证监会上下的支持，以及传媒对证监会工作的报道。 边健身边睇《延禧攻略》 中港监管合作愈来愈频繁，但唐家成并不精通普通话，他昨天自爆6年来一直秘密练兵，每日进修普通话一小时，既学拼音，又学与证监会工作相关的关键字词的读法，更在健身时收看内地剧集，早前大热的宫廷剧《延禧攻略》自然榜上有名，更笑着抱怨被人“剧透”皇后离世，大呼无瘾。 苦练普通话，莫非想转战政坛，更上一层楼？唐家成急忙否认，称自己并无兴趣从政，卸任证监会主席后将会继续在大学教资会的工作，闲时弄孙为乐，岂不快哉。	2018-10-19	信报	财经新闻	凌通	382
普通话从学龄前学起	http://paper.wenweipo.com/2018/10/18/CH1810180050.htm	在此前的调研中，委员们发现，广西2017年普通话普及率为84.72%，提前3年达到国家要求；新疆以确保语言文字工作领域的意识形态安全为重要任务，基本实现国家通用语言教学学前阶段全覆盖，小学、初中起始年级全覆盖。 全国政协常委、副秘书长，民进中央副主席朱永新从贵州省黔西南布依族苗族自治州一位小学校长那里了解到，在一些民族地区尤其是人口居住较为分散的边远山区，相当一部分孩子没有接受学前教育，也无法在学前学会普通话。而部分来自偏远村寨的孩子在小学入学时不能熟练掌握普通话，无法听懂课程，产生了严重的厌学情绪。 朱永新建议，要明确普通话从学龄前学起的要求，将其作为一项国家战略。从现在开始、从目前的学龄前娃娃抓起，全面普及普通话、促进各民族交往交流交融。 全国政协委员杨静华也认为，需要突出义务教育阶段语言教育措施的精准性，“要针对不同民族地区实际情况和语言特点，研究建立最优的教学模式、策略，研制能够…	2018-10-18	文汇报	人民政协		726
普通话普及面不均衡 委员发起“石榴籽计划”	http://paper.wenweipo.com/2018/10/18/CH1810180048.htm	当前，国家通用语言文字面临着普及程度不充分，普及面不均衡的现象--全国普及率为73%，大城市普及率超过90%，而许多农村地区只有40%，东、中、西部发展也很不平衡。 培育中华民族共同体意识 去年，牛汝极曾作为工作队总领队在南疆莎车县驻村一年，“我们所在的村几乎95%以上的村民听不懂普通话，村干部基本上也不会说普通话。据粗略估算，在新疆有近1,000万少数民族群众基本不懂国家通用语言文字。” “广西壮族群众听不懂也不会说的近340万，和田墨玉县18至45周岁的居民90%以上存在听说读交流困难，这种情况在南疆地区也具有普遍性。”针对目前部分民族地区、西部边远地区国家通用语言文字普及率尚待提升的情况，全哲洙建议，要坚定不移推进国家通用语言文字普及，尽快完善并落实相关政策。 “要把《国家通用语言文字法》纳入普法宣传重要任务，在各族群众中培育中华民族共同体意识，不断增强中华民族的凝聚力和向心力。”…	2018-10-18	文汇报	人民政协		1016
【普通话自由谈】普语试考“耳才” 不妨拭“耳”以待	http://paper.wenweipo.com/2018/10/16/ED1810160011.htm	新学年的文汇普通话专栏，定名为“普通话自由谈”，很有意思，是鼓励大家多些讨论。 9月11日，谭志明的文章题为《口音唔怕普通 敢讲已经成功》，重点是讲“先普及，后提高”，他说各种语言，如英语，都有口音，英语不怕口音，才能在全世界普及。 10月3日，简弘毅的《普通话重沟通 有口音不在意》文章，响应了谭志明的论点。简弘毅的文章特别提到了国际文凭组织（IBO）在明年的国际预科文凭课程（DP）语言B（即第二语言课程）中将加入聆听考核部分。其中文考纲上写明：聆听材料会刻意放入不同华语地区的口音和用字，考生必须掌握。这样的中文考纲，可能是前所未有的，值得大家重视。 读了谭、简两位的文章后，记起我在1998年曾在香港科技大学的一次研讨会上，发表过一篇题为《规范普通话和大众普通话》的文章。文章其中一个论点是，除“口才”之外，也应该同时重视“耳才”，也就是说要学会听不同方音的普通话。现在应该加上：要学会听地…	2018-10-16	文汇报	新闻透视眼		1149
普通话和中文	https://skypost.ulifestyle.com.hk/article/2180424/	普通话是语言，中文是语文，两者有别。语言是用来讲的，语文是用来写和读的。一个识字的人，就算他只懂广东话而不懂普通话，也可以书写精准华丽的中文，也可以阅读任何以中文书写的文章。普通话很有用，我也很赞成香港人学讲普通话。不过学讲普通话是一回事，以普通话学中文却是另一回事。政府如果希望香港人学好普通话，可以多找明星宣传普通话的好处，可以拨款在中小学增加普通话课和普通话课教师，甚至可以在持续教育基金中再增加一个普通话进修津贴，但不要去“滚搅”香港中小学的中文教学。 香港合资历的普通话老师是否足够固然是一个问题，香港学生用普通话学中文往往事倍功半，是另一个问题。还有一个较少人谈到的问题是，广东话已经拥有一套完整成熟的广东语语文（广东口语文字），并且可以上溯唐宋典籍音韵。只懂普通话的人看不懂广东语，香港人却能书面语和广东语兼识。别人可能不在意这一点，但以广东话为母语的香港人，就应该以识写识读这种古老…	2018-10-11	晴报	港闻		613
【抓紧机遇】自荐北上开荒 “为了学好普通话”	http://paper.wenweipo.com/2018/10/11/CH1810110041.htm	龚永德1993年初北上发展后，一直从事与内地税务有关的工作。说起自己在内地发展的经历，他笑说，当年自己既不熟悉内地税务，也不会说普通话，他竟然“胆粗粗”向公司请缨北上。“因为我真的很想学好普通话。” 龚永德在香港土生土长，曾在英国求学及工作超过10年，直至1993年返港。 他说，自己回港时，毕马威和其余数家国际会计师事务所都刚取得内地牌照，公司跟他讲，我们香港的团队很大，但想做内地业务的很少，于是他便主动要求赴内地工作。“我当时也没深思为何公司难找人去内地，我只是感到很开心有此机会。” “因为我真的很想学好普通话。”龚永德忆述，“1975年，我曾去过内地，当时还以为自己会讲普通话，结果去了英国，见到从内地来的同学，说完一句『你好吗』，之后就不知如何说下去了，只好讲英语，当时我感觉不是很好，决心将来如果有机会，一定要好好学习普通话。” 龚永德从外国回流，已是“三十而立”，要从头开始学习普通…	2018-10-11	文汇报	人民政协		634
乌市检察院召开大会扬言决战“泛清真化”工作讲普通话坚定政治立场	http://stepaper.stheadline.com/news_content.asp?newsid=A19051.txt&newscat=A2&newsdate=2018-10-10	新疆乌鲁木齐市人民检察院周一召开声势浩大的“决战『泛清真化』”大会，要求检察干警坚定政治立场，在工作中讲普通话、吃自助餐不限于清真食品，以及在微信朋友圈集体亮剑：“我的信仰是马列主义，我不信仰任何宗教，与『泛清真化』决战到底，坚定坚决、至死不渝！” 本报中国组 近年新疆、宁夏等西北地区受伊斯兰教规广泛影响的“泛清真化”现象引起中央警觉，认为助长了“泛伊斯兰主义”“泛突厥主义”等极端主义思想，开始加大打击力度。中共宁夏自治区党委书记李建华曾经强调：“对市场上出现清真标识泛化的倾向，比如清真水、清真纸、清真牙膏、清真化妆品等，我们一定要从维护国家安全的高度，提高警惕。” 宣誓“信仰马列主义” 周一，乌鲁木齐检察院召开决战“泛清真化”大会，党组书记刘明主持会议并讲话，指出检查干警要强化意识形态领域斗争意识，努力打稳长治久安的思想根基。 刘明带头宣誓，“我是一名忠诚的中国共产党党员，我是一名自豪…	2018-10-10	星岛日报	中国		926
【否认贬低】杨润雄：普通话有时较实用方便 广东话理解诗词有优势 10:00	http://news.mingpao.com/ins/instantnews/web_tc/article/20181009/s00001/1539045559337	教育局长杨润雄日前称，综观世界各地中文发展均以普通话为主，“香港700万人社会用广东话学中文，将来会不会长远？会否令我们失去优势呢”，认为须由专家研究，言论惹起争议。杨润雄昨晚再度解画，强调自己没有贬低广东话，但说“有时使用普通话会较方便”，又说“这纯粹是实用上的问题”。 杨润雄昨会晤传媒时，呼吁公众“详细重听”有关电台节目访问，指自己表示对香港来说，广东话可以是一个优势，如理解及领略古代诗词歌赋韵味方面，亦提到“有些情况使用普通话交流，例如与内地或其他人接触，有时使用普通话会较方便”，称“这纯粹是实用上的问题”。 杨润雄又称，其说法是表达究竟用广东话学中文或普通话学中文，长远对香港情况或优势会否有影响，“这是一个疑问，我没有一个先设立场。所以有人觉得我贬低广东话，这完全是不实的报道或揣测……我直至现在还是说，如果以学中文来说，虽然世界上仍有很多人在说广东话，广东省内亦有很多人说广东话，…	2018-10-09	明报	即时港闻		933
【官员有Say】粤语对港是优势 增普通话或更佳	http://paper.wenweipo.com/2018/10/08/ED1810080017.htm	香港落力推动两文三语，如何保持语文能力，是一个需要作专业研究课题。教育局局长杨润雄昨日接受港台节目访问时指，广东话对香港来说是优势，而古诗词歌赋用广东话读出更能带出韵味，强调香港要保留广东话等，但他亦提到，现时世界上学中文多以普通话为主，应该思考日常生活里面多用普通话去表达和学习，会否有更好帮助，长远也需要由专家研究，用广东话学中文会否让香港失去固有优势。 杨润雄受访时表明自己作为广东人以广东话为母语，但香港亦包括少数族裔及来自包括潮州等不同地方的人，难以简单地说明“香港的母语”是否广东话，有关议题“好多人可能有不同看法”，所以他过往选择形容广东话是“学校里面常用教学语言”。 杨润雄：无质疑粤教中 在语文学习方面，他提到，现时有关普通话教中文的争论点，主要在于师生普通话水平能否达到较佳水平。杨润雄强调，广东话对香港而言是优势，“诗词歌赋用广东话读出来才有韵味。” 然而他亦指，全世界来说主…	2018-10-08	文汇报	新闻透视眼		698
质疑广东话学中文 杨润雄倡多用普通话	https://www.am730.com.hk/news/%E6%96%B0%E8%81%9E/%e8%b3%aa%e7%96%91%e5%bb%a3%e6%9d%b1%e8%a9%b1%e5%ad%b8%e4%b8%ad%e6%96%87-%e6%a5%8a%e6%bd%a4%e9%9b%84%e5%80%a1%e5%a4%9a%e7%94%a8%e6%99%ae%e9%80%9a%e8%a9%b1-144738	教育局长杨润雄(图)昨晨于电台节目承认，其母语为广东话，并同意不少古诗歌赋需以广东话诵读才有韵味，但质疑只有香港才用广东话学中文，将来发展能否长远持续甚或失去优势，则要由专家研究；他认为整个世界的中文发展，长远会以普通话为主，建议日常生活多用普通话较好。 他又表示，过往因工作关系，到访内地及接触内地官员的机会多了，感到国家愈开明进步，人民质素高了亦更聪明，并指“内地有啲官员个睇法，或者有啲做法比我哋一啲官员，比我哋仲叻”。其后他再在社交网站发文，解释并非“质疑”用广东话学中文，并重申广东话对香港其实是一个优势，需保持广东话等，只是长远需要研究如何巩固本港两文三语的独特地位。	2018-10-08	am730	新闻		303
杨润雄称普通话学中文将成主流	https://skypost.ulifestyle.com.hk/article/2177447/	教育局局长杨润雄接受电台访问时称，粤语是香港人优势，例如学习诗词歌赋时，部分要以粤语读出才有韵味，但全世界绝大部分地方以普通话学中文，未来中文发展以普通话为主，长远而言粤语会否令港人失去优势则需专家作研究。他认为在日常生活中应多学普通话，及多用普通话作表达。	2018-10-08	晴报	港闻		131
教育局长质疑广东话 建议多用普通话	https://www.am730.com.hk/news/%E6%96%B0%E8%81%9E/%e6%95%99%e8%82%b2%e5%b1%80%e9%95%b7%e8%b3%aa%e7%96%91%e5%bb%a3%e6%9d%b1%e8%a9%b1%e3%80%80%e5%bb%ba%e8%ad%b0%e5%a4%9a%e7%94%a8%e6%99%ae%e9%80%9a%e8%a9%b1-144697	教育局长杨润雄于电台节目承认其母语为广东话，并同意不少古诗需以广东话诵读才有韵味，但质疑只有香港才用广东话学中文，将来发展能否长远持续甚或失去优势，需要专家研究；他认为整个世界的中文发展，长远会以普通话为主，建议日常生活多用普通话较好。	2018-10-07	am730	新闻		120
杨润雄指全球学中文以普通话为主 质疑广东话失优势 (15:29)	http://m.on.cc/nc/hknews/20181007/20181007152950lc.html	【on.cc东网专讯】教育局局长杨润雄在电台节目指，整个世界将来中文发展是以普通话为主，质疑用广东话学中文是否能够长远，认为学生在日常生活中，应该多点学普通话，及多用普通话表达。 杨认为，学界争论应用广东话还是普通话学中文，而广东话对香港人而言是优势，又举例以广东话读出一些古诗词歌赋会才有韵味，但他形容全世界学中文都是以普通话为主，质疑香港人继续以广东话学中文会否失去优势，并要由专家研究。 被问到香港的母语是广东话还是普通话，杨指自己是广东人，所以母语是广东话。他指即使香港常用语言是广东话，但对部分居港的少数族裔，甚至潮州人来说，广东话未必是母语。	2018-10-07	东方日报	即时港闻		301
质疑广东话学中文失优势 杨润雄：中文发展以普通话为主	http://www.stheadline.com/inews-content.php?cat=a&nid=225151	教育局局长杨润雄于电台节目中提及，香港人继续以广东话学中文，长远而言会否失去优势。他又表示，港人应该多学及多用普通话表达。 杨润雄指自己是广东人，所以母语是广东话。但他表示对不少人而言，例如居港的少数族裔，广东话则未必是母语。杨润雄认为，广东话对香港人来说是优势，例如部分古诗词歌赋要靠广东话读才有韵味。不过他指出，世界将来的中文发展以普通话为主，香港700万人社会用广东话学中文，“将来会不会长远？会否有个分别在这令我们失去优势呢？” 杨润雄亦表示，“日常用语，日常生活里面能够多些用普通话表达，或者去学，系咪会好啲呢？”杨润雄指，从教育局的角度，要考虑老师及学生的普通话水平如何，再考虑学校能否以普通话教中文。	2018-10-07	头条日报	即时港闻		331
【母语？】杨润雄：世界将来中文发展普通话为主 质疑广东话学能否长远 13:30	http://news.mingpao.com/ins/instantnews/web_tc/article/20181007/s00001/1538884814296	教育局长杨润雄于港台节目指，日常生活应多用普通话表达，形容整个世界将来中文发展是普通话为主，质疑用广东话学中文是否能够长远。 杨润雄在节目表示，因为他是广东人，故其母语是广东话，惟“对其他好多人来说，你话香港母语是广东话，好多人可能有不同看法”。 杨润雄又说，很多时学界争拗应用广东话还是普通话学中文，“我们广东话对香港来说其实是一个优势，古诗词歌赋是用广东话读出来才有韵味……但同一时间日常用语，日常生活里面能够多些用普通话表达，或者去学，是否会好些呢？” 他解释：“我有时想，当然需要专家研究啦……全世界学中文，你想下有哪些地方（学）广东话？其实无的……即是说成个世界将来的中文发展，是以普通话为主。香港700万人社会用广东话学中文，将来会不会长远？会否有个分别在这令我们失去优势呢？这个要专家去研究。” 问到香港是母语是广东话还是普通话，杨润雄指，“在香港来说……有些人又经常说我闪缩，有一次…	2018-10-07	明报	即时港闻		581
【普通话自由谈】普通话重沟通 有口音不在意	http://paper.wenweipo.com/2018/10/03/ED1810030007.htm	纵使普教中大家意见未必一致，但一说到学习普通话，香港家长一般也非常支持，毕竟多学一点，对孩子发展总有好处。 只是说到实际上课时，大家都对老师要求很高：是哪里人？是京片子吗？大家都似要扭尽六壬，务求跟港式口音撇清关系，要是身边有人“修成正果”，大家都会投以艳羡目光。 说穿了，大家都认为普通话与北方方言关系较大，我们这些南方人，要是舌头没翘到像要碰到喉咙，便会给人看不起似的。 其实香港教育局小学中国语文科课程文件中也有提及，“普通话”一词来自1906年朱文熊《江苏新字母》，他把“普通话”定义为“各省通行的话”。无可否认，现时国家语言文字工作委员会对普通话有一定的规范，而且整个语言系统也是以北方话为基础，但大家不要忘记“普通”二字，其实是“普遍通行”之意，说到底，你走到国家的任何角落都能跟人沟通便可，口音并不是什么大不了的事情。 专家：有口音不影响沟通 笔者有幸曾跟语言学巨擘克拉申教授（Pro…	2018-10-03	文汇报	新闻透视眼		1040
操普通话游客瑞士掐天鹅颈	http://premium.mingpao.com/cfm/Content_News.cfm?Channel=ca&Path=134808585684/ccd1.cfm	【明报专讯】中国游客声称在瑞典遭警察粗暴对待事件上升到外交层面，事件仍没有平息，瑞士又发生疑似中国游客掐天鹅颈的事件。瑞士报章《20分钟》报道，日前有路人在瑞士中部城市琉森的天鹅广场（Schwanenplatz）拍到两名中年亚洲女游客靠近天鹅拍照，其中一人用纸币假装喂天鹅，天鹅啄食时抢走纸币，正在拍摄的另一名女游客即掐住天鹅脖子，抢回钞票，拍摄的路人忍不住惊呼“这是什么鬼？”从影片中可清晰听见两名女游客说普通话、一旁甚至设有“禁止投喂”的英语标示牌。 （《20分钟》）	2018-09-26	明报	中国新闻		249
普通话男持刀闯旺角酒店逼住客开门 台演奏家：差点死在香港 (20:57)	http://m.on.cc/nc/hknews/20180925/20180925205737lc.html	【on.cc东网专讯】台湾笙演奏家陈麒米来港遇上恐怖经历，昨晚(24日)11时，一名操普通话的光头男子，到陈入住位于旺角广东道1131号一间酒店的房间按门铃，陈从防盗眼看到对方打扮正常，拿着报纸，于是将门打开约20度向他查问。该光头男表示从闭路电视看到陈带了5人进房，要求开门让他进入检查，陈觉对方可疑拒绝并关门。 讵料光头男从藏在报纸内的40公分长尖刀拔出，插入房门罅阻止，双方角力后，陈终于关上房门，并立即着房内同行女友人通知酒店职员，职员得悉事件后报警处理。警员接报赶至时，在酒店内未发现可疑人士，于是在附近一带展开搜索，并于广东道寻获一名怀疑与案有关的46岁男子，并当场检获一把利刀。经初步调查，涉案人士持香港身份证，案件列作发现精神紊乱人士处理。 陈麒米其后亦在社交网站Facebook专页贴文讲述事发经过，表示事件中感到生命受威胁，吓得立即改机票飞回台湾，更形容：“昨天我可能差一点就死…	2018-09-25	东方日报	即时港闻		452
冇得做内地主持？祖蓝：我的普通话要努力 (20:52)	http://m.on.cc/nc/ent/20180921/20180921205233en.html	【on.cc东网专讯】中国国家广电总局日前发布《境外视听节目引进、传播管理规定（征求意见稿）》及《境外人员参加广播电视节目制作管理规定（征求意见稿）》，后者明确规定广播电视播出机构“一般不得聘用境外人员担任广播电视节目主持人”，所指的“境外人员”适用于香港、澳门及台湾三地。 主持不少内地综艺节目的艺人王祖蓝，对此向东网回应说：“以我的了解，这个征求意见稿，是放宽了香港、台湾以及澳门三地的人才在内地担任主创人员，这其实反而是好事情，让各地的精英有更多合作的机会。至于你提到在主持方面的限制，内地主持是要考证的，我的普通话还是要继续努力呀！之前我也主要以固定嘉宾的身份参与节目拍摄。”	2018-09-21	东方日报	即时娱乐		305
【普通话教与学】粤普姓氏要读准 正确称呼免误会	http://paper.wenweipo.com/2018/09/19/ED1809190011.htm	新学年开始了，学校的普通话班也陆续开课。我们作为老师的，当拿到学员的出席表，第一件事要做的就是先读准学员的姓名，然后再把名字背下来，务求上课的时候，能叫出学员的姓名，给予他们亲切感。 这天我进了教室，因为第一节课，所以我除了先介绍自己的名字之外，也让同学逐一介绍自己的姓名。一位同学站起来介绍，“我叫雍××，我的爱好是”我一听“雍××”，我的出席表里面没有这个姓氏啊？难道走错了教室？确认自己没有走错教室后，就让学员在白板上写出自己的姓名，原来他姓“翁(Weng)”，而不是姓“雍(Yong)”。 “翁”和“雍”字在粤语中，发音都是读作“Yung1”，但是普通话的发音确不一样。香港有很多学员都会受粤方言干扰，容易把“翁老师”喊成“雍老师”，把“翁先生”喊成“雍先生”，这样就容易引起误会了。 我们还有很多类似这样的姓氏，比如粤语读音相同的“卢”和“劳”(Lou4)，普通话则分别读作“卢(Lu)”…	2018-09-19	文汇报	新闻透视眼		1064
第21届全国推广普通话宣传周拉开帷幕	http://paper.ce.cn/jjrb/html/2018-09/13/content_372455.htm	新华社北京9月12日电 （记者胡浩） 记者12日从教育部获悉，第21届全国推广普通话宣传周今天正式拉开帷幕。宣传周期间，全国各地将开展内容丰富、形式多样的活动，宣传国家语言文字法律法规、方针政策和规范标准，传播中华语言文化。 在今天于四川凉山彝族自治州举行的宣传周开幕式上，教育部副部长、国家语委主任杜占元表示，今年初，教育部、国家语委联合国务院扶贫办印发了《推普脱贫攻坚行动计划（2018—2020年）》，将国家通用语言文字推广普及纳入脱贫攻坚战略。希望深度贫困地区能够以宣传周为平台，巩固好推普脱贫攻坚成果，再接再厉，勤谋善动，敢闯敢干，解决因语言不通而阻碍脱贫致富的问题。 近20年来，国家语言文字事业取得了显著成就，普通话普及率从2000年的53％提高到2015年的73％左右，普通话水平参测人次累积超过6500万，95％以上的识字人口使用规范汉字，社会用字进一步规范。同时，中文成为越来越…	2018-09-13	北京经济日报	要闻		623
说好普通话，迈进新时代	http://wenhui.news365.com.cn/html/2018-09/13/content_697621.html	新华社北京9月12日电 （记者胡浩）记者12日从教育部获悉，第21届全国推广普通话宣传周今天正式拉开帷幕。宣传周期间，全国各地将开展内容丰富、形式多样的活动，宣传国家语言文字法律法规、方针政策和规范标准，传播中华语言文化。 在今天于四川凉山彝族自治州举行的宣传周开幕式上，教育部副部长、国家语委主任杜占元表示，今年初，教育部、国家语委联合国务院扶贫办印发了《推普脱贫攻坚行动计划 （2018—2020年）》，将国家通用语言文字推广普及纳入脱贫攻坚战略。希望深度贫困地区能够以宣传周为平台，巩固好推普脱贫攻坚成果，再接再厉，勤谋善动，敢闯敢干，解决因语言不通而阻碍脱贫致富的问题。 近20年来，国家语言文字事业取得了显著成就，普通话普及率从2000年的53%提高到2015年的73%左右，普通话水平参测人次累计超过6500万，95%以上的识字人口使用规范汉字，社会用字进一步规范。同时，中文成为越来越…	2018-09-13	文汇报[上海]	国际;教科卫		619
郑伊健普通话笑爆咀 《幻乐之城》重现电影经典画面	ttps://www.am730.com.hk/news/%E5%A8%9B%E6%A8%82/%e9%84%ad%e4%bc%8a%e5%81%a5%e6%99%ae%e9%80%9a%e8%a9%b1%e7%ac%91%e7%88%86%e5%92%80-%e3%80%8a%e5%b9%bb%e6%a8%82%e4%b9%8b%e5%9f%8e%e3%80%8b%e9%87%8d%e7%8f%be%e9%9b%bb%e5%bd%b1%e7%b6%93%e5%85%b8%e7%95%ab%e9	《幻乐之城》近几集开始找来香港歌手加入演出，继容祖儿、张智霖之后，最近一期就有郑伊健出场。今次他找来合作多次的刘伟强导演，炮制一个8分钟名为《追风》的音乐短剧，把《风云雄霸天下》、《古惑仔3之只手遮天》、《极速传说》3部经典画面重视在大家面前，当中在他唱《虫儿飞》部份，更动用到威吔，难度极高。 音乐短剧当中，郑伊健用几句对白将三个部份串连一齐，但伊健的普通话就跟不少香港人一样，非常普通，因而成为网民笑话。究竟伊健的普通话有几普通?绝对是拍得住古天乐的“轮胎能”。有部份人士就批评伊健至今仍未学好普通话，成为《追风》其中一个败笔，又指他有责任令观众堕入剧情，但就因为语言问题令人出戏。不过，亦有不少人为他护航，认为他的港式普通话非常有味道，令到节目气氛甚好。同时有很多网民指伊健唱出的三首歌曲，令他们回忆起不少经典电影画面。	2018-09-12	am730	娱乐		376
【参加完《创造101》】自以为普通话有进步 许靖韵咬字欠准绳 17:02	http://news.mingpao.com/ins/instantnews/web_tc/article/20180911/s00007/1536656642218	【今日直击】许靖韵（Angela）今日到电台，宣传自创国语歌《事与愿违》，穿紧身上衣的Angela上围丰满，她直认近日发福，她又谓以为去完内地参与《创造101》后，自己普通话已经进步不少，但原来咬字不太准确，录音时仍要老师从旁指导。 另外，Angela的“新欢”容颖贤和“旧爱”罗启聪在节目《全民造星》中同场决斗，她说：“我有看，我觉得姜涛几靓仔，跳舞和唱歌都不错，（男友被foul？）所有朋友去参加这个节目，我都会鼓励，（安慰男友？）我后期才开始看，之前身在内地没有看。” （即时娱乐）	2018-09-11	明报	即时娱乐		268
【普通话自由讲】口音唔怕普通 敢讲已经成功	http://paper.wenweipo.com/2018/09/11/ED1809110011.htm	香港在过去的英语课堂中，部分英语老师会这样说话：“You ah, dong talk any mor ah, otherwise ah, I will stay you after school ah.”这种混杂粤语的港式英语，当然是较为极端的例子，但大部分港人说英语，用港式发音也是屡见不鲜。 笔者亦曾在超级巿场听到港妈对儿子说：“You give me some face, if not, I will show you some colour.”本文无意取笑港式英语，反正英语在全世界口音各异，词汇语法皆不同，总之能沟通就好。英语的普及情况，也许能给普通话在香港的推广一点启示。 在香港，只要你敢说英语，哪怕口音不是那么标准，也没有人理会，而且大家也似乎有共识，英语带有母语口音，也不必刻意磨灭。于是人人都不怕说英语，“士菇”（school）、“摩牙”（more）等到处皆是，大家都不当标准…	2018-09-11	文汇报	新闻透视眼		1524
IBM人工智能教室亲历其境学普通话	http://orientaldaily.on.cc/cnt/china_world/20180909/00180_039.html	【本报综合报道】随着科技进步，语言学习变得愈来愈有趣。美国国际商业机器公司（IBM）和纽约州伦斯勒理工学院近日利用人工智能和令人身历其境的技术，让学习者以崭新方法学习普通话。 向熊猫侍应模拟落单 学生走进约四米高的房间内，面对巨型显示屏。屏幕能显示不同场景，例如在中餐厅，学生就须以普通话向熊猫侍应落单叫豆腐等食品。另外软件还模拟北京街巿场景，让学生跟小贩倾谈；学生又可在庭园背景，模仿画面中的师傅学习太极。用家可以透过科技融入中国文化当中。 惟研发系统的专家笑称，因为人工智能系统未能复杂到可以应付语言老师所有工作，所以语言老师不用担心失业。	2018-09-09	东方日报	国际		307
【普通话教与学】口语四字词 讲话更生动	http://paper.wenweipo.com/2018/09/05/ED1809050011.htm	香港无线电视最近在8点半黄金时段，播放内地电视剧《延禧攻略》，刚播放了没多久，大家茶余饭后的话题都跟它有关。我平时不怎么看电视，但为了跟学员多一些话题，就上网搜了一下相关资料。原来这套电视剧里出现了很多金句，如“换成我，千万人的唾沫（tuomo），我也能唾面自乾”。又如“人心存良善，更应懂自保”。再如“凡欺人者，他日必为人所欺”。 我呢，则比较喜欢女主角魏璎珞非常霸气的那一句：“我，魏璎珞，天生脾气暴，不好惹，谁要是再唧唧歪歪，我有的是法子对付她。”我喜欢它的原因，是因为这句话中的一个词语，又可以让我带出一个教学重点。 前几天上课，刚好其中一个教学重点是口语四字词，我举了这个例子。这句话中有一个词语是“唧唧歪歪”，大多数同学都不太明白是什么意思，于是就问我。《现代汉语词典》（第七版）的解释是：状态词，形容说话做事囉嗦繁琐，不乾脆，例如：“这个人整天唧唧歪歪的，真烦。” 形容说话声音多变 …	2018-09-05	文汇报	新闻透视眼		1103
普通话专业协会首届执委就职	http://paper.wenweipo.com/2018/09/03/AY1809030005.htm	（记者 子京）香港普通话专业协会日前举行“庆祝香港特别行政区成立21周年暨第一届执行委员会就职典礼”，逾500位嘉宾友好欢聚见证。 该会主席靳彤彤指，该会凝聚了一大批具有专业知识的优秀教师及专业人才，创会一年会务蓬勃发展，会员人数不断增加。 该会带领普通话业界各教育机构、老师、学生、学生家长及广大香港市民，举办了多项推广普通话的正能量活动，包括文化交流推广、师资教育培训、朗诵比赛、文艺汇演、社会公益及参与内地青少年“一带一路”活动交流等。 中联办新界工作部副部长谢锦文表示，该会的成立非常合时宜，对在香港开展普通话正能量活动具有很大促进作用。 港区全国人大代表、新社联理事长陈勇，港区全国人大代表、香港珠海社团总会会长邝美云，在发言中则强调了普通话在与内地及世界沟通时的重要性。 沙田区议会主席何厚祥，沙田乡事委员会主席莫锦贵，新社联沙田地区委员会主席李世荣等议员及地区领袖出席典礼。	2018-09-03	文汇报	社团新闻		451
冀港青学好普通话 拓更大择业空间	http://paper.wenweipo.com/2018/08/30/CH1808300053.htm	当前，香港与内地的关系越来越密切，各方面的合作交流也越来越多，“我特别想跟香港的孩子说，一定要学习普通话，这不仅仅是因为普通话是我们国家的通用语言。汉语普通话蕴含着巨大的资源，学会普通话也能拥有更广阔的择业空间。” 海霞表示。 她给香港文汇报记者讲了一个小故事，“曾经有一位外交官跟我说过，40年前，他的爷爷告诉他父亲说，必须要学习英语，因为当你长大的时候，你生活的每一天都会跟英语产生关系。但是几十年过去之后，他的父亲跟他说，必须要学习中文，因为当你长大的时候，你生活的每一天都会跟中文产生关系。”海霞认为，这凸显出中国在国际上的重要性和地位，同时也彰显出汉语在未来的世界交流中也会占据重要地位。 “从这个角度讲，尽管香港的面积不大，但很多香港的孩子都有博大的胸怀，希望到世界去闯一闯。现在香港的孩子英文比较好，又懂粤语，如果能掌握汉语普通话，对孩子未来的发展无疑有巨大的帮助。” 海霞表示。 冀…	2018-08-30	文汇报	人民政协		691
普通话推广不影响文化多样性	http://paper.wenweipo.com/2018/08/30/CH1808300055.htm	在中华民族博大精深的文化大体系中，少数民族文化拥有举足轻重不可替代的重要地位。在少数民族地区推广普通话是否破坏了少数民族文化、削减了少数民族文化的多样性？“我认为这两者并不矛盾。”海霞表示，对一个民族的生存来说，学会普通话，大家有饭吃，把日子过好了，才能谈到发展的问题。 海霞举例解释说，央视曾报道过一位在江西打工的新疆小哥的故事，刚开始他因为不会说普通话，根本没办法与人交流，以至于生意都没有办法做。后来他下定决心学会了普通话，能交流之后，短短几年时间就已经在江西开了15家餐厅，这已经不仅仅是脱贫，而是致富了。而且他还招了很多人，条件就是必须会说普通话。“这个故事很有代表性，从中可以看出，能够使用国家通用语言对精准扶贫上的作用非常大。” 事实上，国家对少数民族语言文化的保护一直很重视。每年都会拨出专门资金，做好少数民族文化和语言的保护、传承。海霞认为，在民族地区物质生活水平提高的同时，关照…	2018-08-30	文汇报	人民政协		450
中年汉涉庭内亮刀吓官 法庭书记：被告边走近边普通话说“我斩你”、“贪官污吏” 14:50	http://news.mingpao.com/ins/instantnews/web_tc/article/20180828/s00001/1535437851287	中年男子早年在一宗伤亡索偿案败诉，于高等法院得知其第二次上诉申请被驳回后，涉用菜刀恐吓原审时判他败诉的法官陈嘉信，案件今续审。男子在庭上指，他取刀出来前，陈官已经离开了法庭，而他取出来的刀仍附胶壳套着。法庭书记不同意被告说法，另指自己较陈官早离庭，但当时有先以眼神“望一望（法官通道）门口”，认为陈官有看到其眼神。 被告余祖林（53岁）否认刑事恐吓法官陈嘉信、刑事损坏一张法官长枱及在高院第13庭内管有攻击性武器罪。 当日第13庭的法庭书记关文宇今以证人身分作供指，涉案男子进庭后，坐在记者席第一排最近法官的位置，一阵子后该男子从袋取出一把仍有些塑胶包装的新菜刀，右手握着刀柄想站起来。关指，他当时立即站起来叫“等等”，其后看了一看陈官，“见到法官（陈官）望到男子嘅动作，我继续注视法官”，而陈官亦有回看他，他又再看着该男子，随后“我眼神有少少望一望（法官通道）门口”，认为陈官应有看到其眼神，遂自…	2018-08-28	明报	即时港闻		610
疑娶中国妹子Gary同囝囝讲普通话	http://orientaldaily.on.cc/cnt/entertainment/20180822/00288_007.html	韩国节目《Running Man》的40岁前主持Gary于去年4月闪婚，同年11月荣升人父。虽然有韩媒披露其妻子较他年轻十岁，是其公司旗下的靓女职员，但身份至今成疑。不时在社交网分享凑仔乐的Gary，近日上传10个月大的囝囝短片，虽然只见背影，但他正投入玩有音乐铃声的玩具，十分可爱！ Gary更用普通话问囝囝：“儿子，你的梦想是DJ吗？儿子，在干嘛？”不少网民见他用中文跟儿子互动，再次怀疑其妻是中国人，更有人留言：“严重怀疑你（Gary）娶了中国妹子”。	2018-08-22	东方日报	国际娱乐		242
普通话翡翠台下月停播 TVB发言人：为配合增长策略 20:10	http://news.mingpao.com/ins/instantnews/web_tc/article/20180822/s00007/1534939926812	无线早前传出大地震并有裁员计划，关闭16厂及解雇部分戏剧组员工，无线总经理郑善强上月出席活动时已否认此事。可是今日再有消息传出，指无线因为近年生意额下跌，各部门要交人外，今年3月才成立的普通话翡翠台及TVB Radio将会停播。 TVB发言人就此回应：“直播新闻台(700)、myTV SUPER直播新闻台(800)及体育台(94)已于8月15日停播。而旅游台(96)将于9月1日与综艺台(92)合并，综艺台会改名为综艺旅游台。为配合增长策略，部分myTV SUPER主题频道将会以自选节目服务取代。TVB Anywhere方面，普通话翡翠台、TVB Radio及TVB8将于9月1日起停播。” （即时娱乐）	2018-08-22	明报	即时娱乐		328
爆笑普通话 仙乐都发错音流鼻水变甜故 (06:30)	http://m.on.cc/nc/ent/20180819/20180819063055en.html	【on.cc东网专讯】女星“仙乐都”吴尧尧（YoYo）早前在内地拍摄电影《鹏城岁月之富享义方》，当中要挑战一场喊戏，由于过于投入角色，搞到拍至放午饭时仍鼻水唔收！普通话麻麻的她自爆拍摄时闹出笑话：“剧组放饭嗰阵，大家会围埋一齐食，气氛好轻松，当我用普通话讲『鼻水都流出来』，竟然将『鼻』读成『B』，原来系普通话解做女性生殖器官！”笑言不少“港普”艺人在内地工作时，总会产生这类型的笑话：“等埋位时冇咁闷，带畀大家好多欢乐，笑到傻咗！”YoYo又指与剧组相处融洽，就算多忙都觉得值得。	2018-08-19	东方日报	即时娱乐		243
观塘普通话雌雄匪疑借钱不遂拖后巷打劫 事主逃脱：提高警惕	http://www.stheadline.com/inews-content.php?cat=a&nid=183652	借钱不遂变抢劫？有网民声称，其女同事在观塘遇上一对操普通话男女，因借钱不遂竟试图拖事主入后巷行劫，幸事主狂奔，报警时获知同类事件已非首次出现，呼吁市民提高警惕。本网正向警方查询详情。 有网民声称，“有同事昨晚喺观塘工业区，遇到一男一女大陆人用普通话问借钱，她拒绝后，竟被二人拖到后巷企图抢劫，幸最后她成功奔走逃脱，事后立即报警”。网民引述警方，指“此手法近期已出现过，相信是同一班内地骗徒／劫匪搵食，通常会走匀各区，借唔到就抢，但失败后通常会隔几个月再到同区出现” 网民呼吁，“遇到这些攞散纸搭车党／借钱党，一定要保持高度戒备，如遭拒绝，对方可能会索性打劫”，提醒“不要一个人逗留在寂静的地方，不要时常低头看电话，见到可疑的人靠近要保持距离，有事要大叫救命逃走，或走到有闭路电视的位置”。网民形容，“因为佢（女事主）唔敢自己一个行出公司门口，对事件犹有余悸，搵咗我同另一位男同事陪”。 网民纷纷留言…	2018-08-15	头条日报	即时港闻		557
观塘普通话雌雄匪疑借钱不遂拖后巷打劫事主逃脱：提高警惕 15:30	http://std.stheadline.com/instant/articles/detail/791914-%E9%A6%99%E6%B8%AF-%E8%A7%80%E5%A1%98%E6%99%AE%E9%80%9A%E8%A9%B1%E9%9B%8C%E9%9B%84%E5%8C%AA%E7%96%91%E5%80%9F%E9%8C%A2%E4%B8%8D%E9%81%82%E6%8B%96%E5%BE%8C%E5%B7%B7%E6%89%93%E5%8A%AB+%E4%BA%8B%E4%B8	借钱不遂变抢劫？有网民声称，其女同事在观塘遇上一对操普通话男女，因借钱不遂竟试图拖事主入后巷行劫，幸事主狂奔，报警时获知同类事件已非首次出现，呼吁市民提高警惕。本网正向警方查询详情。 有网民声称，“有同事昨晚喺观塘工业区，遇到一男一女大陆人用普通话问借钱，她拒绝后，竟被二人拖到后巷企图抢劫，幸最后她成功奔走逃脱，事后立即报警”。网民引述警方，指“此手法近期已出现过，相信是同一班内地骗徒／劫匪搵食，通常会走匀各区，借唔到就抢，但失败后通常会隔几个月再到同区出现” 网民呼吁，“遇到这些攞散纸搭车党／借钱党，一定要保持高度戒备，如遭拒绝，对方可能会索性打劫”，提醒“不要一个人逗留在寂静的地方，不要时常低头看电话，见到可疑的人靠近要保持距离，有事要大叫救命逃走，或走到有闭路电视的位置”。网民形容，“因为佢（女事主）唔敢自己一个行出公司门口，对事件犹有余悸，搵咗我同另一位男同事陪”。 网民纷纷留言…	2018-08-15	星岛日报	即时香港		557
EXO澳门开骚晒普通话 伯贤独舞险爆呔 (11:20)	http://m.on.cc/nc/ent/20180811/20180811112050en.html	【on.cc东网专讯】韩国人气男团EXO昨晚假澳门威尼斯人金光综艺馆举行演唱会，是他们相隔近两年在澳门开骚，他们唱出《Growl》、《Call Me Baby》、《Ko Ko Bop》及《Lotto》等多首人气歌曲。 8子逐一用韩文及中文跟粉丝打招呼，并用普通话大讲“好久不见”、“你们开心吗？”及“真棒”，而中文最叻的成员世勋就用普通话说：“今天很多很多人来，我希望大家玩得开心，知道了吗？” 成员准备Solo及Cross over的特别演出，包括世勋及灿烈合唱的《We Young》，Kai及世勋各自表演独舞，队长Suho唱出《Playboy》，伯贤演绎《Psycho》，并大跳劲舞。Suho大爆世勋表演独舞后回到后台时，差点累到晕低，世勋就说：“我冇晕低，如果晕低就唔会企喺度了。”他指虽然演出很累，但有大家支持，他也感到有了力量。伯贤则搞笑地指跳独舞时差点爆裤：“条裤好似细咗，我明明一直减…	2018-08-11	东方日报	即时娱乐		857
梅州宣传横额称“坚决产出黑恶势力” 政府：应为“铲除”，普通话拼音相同 20:57	http://news.mingpao.com/ins/instantnews/web_tc/article/20180809/s00004/1533817826189	广东省梅州市宣传横额上写着“坚决产出黑恶势力，保障人民安居乐业”，当中“产出黑恶势力”引起网民热议。梅江区委宣传部指，广告公司忙中有乱出错，将“铲除”印成“产出”，日后将加强审查。 内地网上热传一张梅江区街头红底黄字、贴在高速公路护栏上的横额，写道：“坚决产出黑恶势力，保障人民安居乐业、社会安定有序、国家长治久安”。下款印有“梅州市梅江区金山街道办宣”。网民上载相片调侃，微博“华华仔_Jeremy”指那是“特别丢脸的错别字”，“乐_疯子”戏言梅州产出黑社会“很高产”。 梅江区委宣传部女职员证实确有该横额，称因“产出”与“铲除”的普通话拼音相同，广告公司忙中有错，列印口号后未有检查，也未提交部门审批，晚上自行挂上街头。宣传部得悉后，立即更换横额。据悉，梅江区委、区政府特意为事件召开专题会议，要求日后各区单位要审核所有宣传标语、横额、宣传栏，避免类似事件重演。 （北京时间）	2018-08-09	明报	即时两岸		425
操普通话男子IFC挥刀被捕 情绪激动爆粗起飞脚 16:05	http://news.mingpao.com/ins/instantnews/web_tc/article/20180809/s00001/1533799708583	一名操普通话男子，下午1时许在中环国际金融中心商场一店铺对外挥刀，无人受伤。男子送院时情绪激动，以粗言大骂记者。 下午1时许，一名43岁李姓男子，在中环国际金融中心商场位置挥刀。警员到场将他制服。其间男子情绪激动，边以普通话大骂“他Ｘ的”边起飞脚。警方以涉嫌藏有攻击性武器将他拘捕，男子被送往玛丽医院。	2018-08-09	明报	即时港闻		164
同学变闺蜜 唐贝诗挑战普通话朗诵 (06:30)	http://m.on.cc/nc/ent/20180807/20180807063004en.html	【on.cc东网专讯】艺人唐贝诗（Lydia）最近到了北京电影学院上堂一个月进修演技，她透露全班有四十多人，同学来自全国各地，大家相处得十分融洽，她表示：“我同坐我隔篱嘅两个女仔都成为好朋友，有个会每日买早餐畀我食，我觉得系好窝心，另一个系做电视台主持，佢嘅普通话好标准，得闲就会帮我补习，又会将要读嘅文章录音再send畀我，真系好好人。”Lydia称台词班要以普通话朗诵诗、小说、散文等，对她来说非常大挑战，幸好有热心同学帮忙，令她甚为感激。	2018-08-07	东方日报	即时娱乐		224
政情：致词“支持”变“猪持” 张建宗讲普通话惹笑	http://orientaldaily.on.cc/cnt/news/20180807/00176_086.html	政务司司长张建宗嘅普通话水平一向好普通，但系佢依然唔怕被人笑，每次活动有需要时，仍然努力讲普通话。寻日佢出席“足球发展伙伴计划”青年交流团授旗仪式，以普通话致词时，一句“冰岛只有三十多万人”，几乎完全系广东话，现场观众都忍唔住笑。 临尾仲走埋音 今次活动系有关香港同北京嘅青年足球队去冰岛集训及进行三角赛，张建宗以两文三语致词时，喺普通话部分，近一半都令人听唔明或者变成歪歪哋嘅广东话，讲到临尾仲要有啲走音添。同一句夹杂咗普通话同广东话，变成广东话嘅字包括“推动”、“青年”及“我相信”，讲到“支持”个支字，仲变成广东话嘅“猪”字。 讲真嗰句，张建宗已经六十几岁人，要学一种新语言都唔容易，依家有一半讲到系普通话，已经算有进步。不过下次可以考虑普通话嘅讲词精简啲，咁就练少几句，又准确啲啦！	2018-08-07	东方日报	港闻		380
政Whats噏：张建宗港式普通话爆笑 支持变猪持 (16:56)	http://m.on.cc/nc/hknews/20180806/20180806165613lc.html	【on.cc东网专讯】政务司司长张建宗嘅普通话水平一向好普通，但系佢依然唔怕被人笑，每次活动有需要时，仍然努力讲普通话，佢今日(6日)出席“足球发展伙伴计划”青年交流团授旗仪式时，以普通话致词时，一句“冰岛只有30多万人”，几乎完全系广东话，现场观众都忍唔住笑。 今次嘅活动系有关香港同北京嘅青年足球队去冰岛集训及进行三角赛。张建宗以两文三语致词时，喺普通话部分，近一半都令人听唔明或者变成歪歪哋嘅广东话，讲到临尾仲要有啲走音添。同一句夹杂咗普通话同广东话，变成广东话嘅字包括“推动”、“青年”、“我相信”，“支持”个支字，变成广东话嘅“猪”字。 讲真嗰句，张建宗已经60几岁人，要学一种新嘅语言都唔容易，依家有一半讲到系普通话，已经算有进步，不过下次可以考虑普通话嘅讲词精简啲，咁就练少几句，又准确啲啦！	2018-08-06	东方日报	即时港闻		377
游日用普通话买饮料内地客呛店员：中国话为什么不会 10:21	http://std.stheadline.com/instant/articles/detail/782728-%E4%B8%AD%E5%9C%8B-%E3%80%90%E7%89%87%E6%AE%B5%E3%80%91%E9%81%8A%E6%97%A5%E7%94%A8%E6%99%AE%E9%80%9A%E8%A9%B1%E8%B2%B7%E9%A3%B2%E6%96%99+%E5%85%A7%E5%9C%B0%E5%AE%A2%E5%97%86%E5%BA%97%E5%93%A1%EF%BC	一名内地女子日前到日本旅游，以为当地服务业从业员都会讲普通话，并测试当地便利店9一名女店员，在她面前用中文讲“饮料”，结果对方不明白她说什么，该名内地女子斥对方“中国话为什么不会？”，引起网友讨论。 网民“日本小智”在微博上载影片，见到一名女子拿著手机录影，并说“测试一下日本店里面的小妹妹”，接著镜头拍摄到一名店员，十分客气地向她鞠躬，但女子却用中文对店员说“饮料”，店员听后感到疑惑，并用日文回应“不好意思、我不知道！”甚至发现对方拿手机在拍摄，疑似认为是整人节目笑了出来，不料女子却呛“中国话为什么不会？”。 不少网民都些感到愤怒，“亏她还问得出口”、“出门脑子为什么不带”。	2018-08-04	星岛日报	即时中国		315
面斥日本便利店员不懂普通话 网民直呼：丢人 13:59	http://news.mingpao.com/ins/instantnews/web_tc/article/20180804/s00005/1533362048710	出国旅游许多时都会因不谙当地语言，而变得难以沟通，但近日内地微博广传一段从手机应用程式“抖音”截取的影片，显示一名操东北口音普通话的女子在日本的便利店，走到女店员面前说“饮料”，但在对方听不懂后直言：“中国话为什么不会？”片段随即引起内地网民批评，认为拍片者“丢人”。 根据微博用户“日本小智”转载的影片所见，拍片女子一开初表示要“问一下日本店里的小妹妹”，然后便走到收银台前和举机拍摄着女店员，获店员鞠躬欢迎。拍片者随后以普通话两度向店员说：“饮料”，但对方一面困惑表示：“不好意思、我不知道”，女子即继续用普通话反问：“中国话为什么不会？” 片段在网上掀起热议，有网民直呼“丢人”，称“在别人国家要求人人会你的母语？”，有人则批评女子在未经店员同意下拍摄非当不礼貌。 （微博）	2018-08-04	明报	即时国际		375
孖韩庚谷新片 山下智久晒普通话兼饮苦茶 (20:05)	http://m.on.cc/nc/ent/20180802/20180802200554en.html	【on.cc东网专讯】内地歌手韩庚、台星凤小岳、和日本演员山下智久为新片《解码游戏》进行内地宣传。韩庚透露影片拍摄中遇到的重重困难：“这部戏每个人都有受伤，这是我拍电影以来最危险的电影。从八层的平台，一层一层跳。我的角色设定是没有受过训练，所以我只能往后仰，躺的时候硬碰钢筋板，整个背部都肿了。” 而凤小岳和山下智久则携手到广州宣传，二人向影迷透露在电影中，由雇佣关系转为对立关系，还藉此学习普通话，双双收获新技能，凤小岳用普通话对山下智久说：“老板，恭喜发财！”山下智久也以普通话回应：“打工仔，你很帅！” 除此之外，两人还在现场品尝广州特色凉茶，各自挑选一甜一苦，山下智久运气不佳选到苦味凉茶，难掩苦涩又故作淡定的表情电晕不少现场影迷。	2018-08-02	东方日报	即时娱乐		344
普通话错辨词语“舰艇”变“监听”	http://stepaper.stheadline.com/news_content.asp?newsid=F01195.txt&newscat=F&newsdate=2018-07-31	至于普通话基准试方面，报告指仍有不少常见错误，有考生将“舰艇”误听为“监听”，更出现“给一分钟你们”、“隔壁”等粤语句式。在卷四课堂语言运用，有考生在教学期间犯错，向学生教授平舌音“z”时，错误解释发音会“有气喷出来”。 今年普通话基准试有逾二千一百人应考，虽四份分卷的达标率均有上升，卷一聆听与认辨更达七成八，较去年升近两成，但报告指考生仍屡见错误，包括错误听辨词语，将“舰艇”误听为“监听”、“应时”误听为“影视”等；未能分辨属于普通话规范的句子，如“你公德心给狗吃啦”、“还是技术不够精嘛”，反而误把“你在发白日梦吧”、“睡觉连腿脚都伸不直”等句子视作合乎规范。 在评核课堂用语时，小部分未达要求的考生，在过程中向学生传达错误信息，如教授声母平舌音“z”时称“有气喷出来”、讲解后鼻韵母“eng”的发音时，错称“声音是从鼻子后面发出来的”。部分考生受粤语句式影响，出现“给一分钟你们（给你们一…	2018-07-31	星岛日报	教育	余嘉欣	473
【网上热话】男童港铁站大堂大便 操普通话同行男子：孩子突然闹肚子 18:04	http://news.mingpao.com/ins/instantnews/web_tc/article/20180728/s00001/1532771515712	人有三急，但未必人人都会在公众地方“解决”。有网民在fb群组上传影片，称今午约1时半，有孩童在尖沙嘴站大堂随地大便。片段显示操普通话的同行男子，在拍片者的多番追问下解释：“这个孩子突然闹肚子了”。 据网民Unique Cheung发布至fb群组“香港突发事故报料区”的片段，数名男童与同行男子身穿一样制服，并写有“vChina”字眼，一同都在便溺处附近。港铁职员和清洁人员亦已到场，准备进行清理。 拍片女子先后以广东话及普通话追问他们从什么地方来港，其后斥责同行男子：“你（年纪）那么大，不知道（随处大便）是不可以的吗？”男子一直未有反应，拍片者再说：“我们这里是香港，不是内地，你听得懂吗？”男子方走到一旁解释，“这个孩子突然闹肚子了”。 拍片者即质疑肚痛时大可找人帮忙，“小朋友说忍不住对不对，你那么大个人不懂得处理啊”。她又问旁边的小朋友有否感到不恰当，当中一名男童即点头。网民在帖文下亦留言…	2018-07-28	明报	即时港闻		700
晒囝囝萌爆短片！Gary普通话谷9月台东骚 (17:01)	http://m.on.cc/nc/ent/20180726/20180726170140en.html	【on.cc东网专讯】韩国人气节目《Running Man》的40岁前主持Gary，去年4月宣布与较他年轻10岁的圈外女友结婚，并于去年11月宣布升呢做爸爸，一直专注凑仔的Gary，透过Instagram（Ig）公开囝囝的最新短片，见其囝囝似乎想勇闯围栏外，十分可爱。 此外，久未露面的Gary还以须根look拍片宣传9月1日的台东慈善演唱会，他以普通话说：“好久不见！你们过得好吗？我要去台东演唱会，9月1日，第一次去台东，所以很期待，我听说台东风景很美丽，朋友们很美丽，肚子有点饿，我知道我的中文不好，可是没问题！”	2018-07-26	东方日报	即时娱乐		273
Kelly Online：万人迷碧咸卖葡挞晒普通话 与罗兰姐林雪演对手戏	http://www.stheadline.com/inews-content.php?cat=a&nid=163084	万人迷碧咸早前到澳门拍广告，更与罗兰姐和林雪等做对手戏，但内容一直保密。近日广告终于出炉，原来万人迷是为一家酒店的葡挞卖广告，随即在网上疯传。 广告以微电影方式拍摄，讲述碧咸到澳门寻找曾吃过的葡挞味道，他在微电影中一间茶餐厅中试食葡挞，他更以普通话讲“不是那个味道”，随即引起大厨林雪不满，更追打碧咸，碧咸随即反枱走人。 几经波折，碧咸终于找到他曾吃过葡挞的店铺，但已人面全非，他试食葡挞后发现与那时的一样，再以普通话讲“就是这个味道”。这个时间罗兰姐终于出场与万人迷相拥，更亲切叫万人迷做“小贝贝”，两人终于重遇。 片段来源：Venetian Macao 澳门威尼斯人	2018-07-20	头条日报	即时港闻		320
维港会：万人迷碧咸卖葡挞晒普通话与罗兰林雪演对手戏 11:10	http://std.stheadline.com/instant/articles/detail/770716-%E9%A6%99%E6%B8%AF-%E7%B6%AD%E6%B8%AF%E6%9C%83%EF%BC%9A%E8%90%AC%E4%BA%BA%E8%BF%B7%E7%A2%A7%E5%92%B8%E8%B3%A3%E8%91%A1%E6%92%BB%E6%99%92%E6%99%AE%E9%80%9A%E8%A9%B1+%E8%88%87%E7%BE%85%E8%98%AD%E6%9E	万人迷碧咸早前到澳门拍广告，更与罗兰姐和林雪等做对手戏，但内容一直保密。近日广告终于出炉，原来万人迷是为一家酒店的葡挞卖广告，随即在网上疯传。 广告以微电影方式拍摄，讲述碧咸到澳门寻找曾吃过的葡挞味道，他在微电影中一间茶餐厅中试食葡挞，他更以普通话讲“不是那个味道”，随即引起大厨林雪不满，更追打碧咸，碧咸随即反枱走人。 几经波折，碧咸终于找到他曾吃过葡挞的店铺，但已人面全非，他试食葡挞后发现与那时的一样，再以普通话讲“就是这个味道”。这个时间罗兰姐终于出场与万人迷相拥，更亲切叫万人迷做“小贝贝”，两人终于重遇。 片段来源：Venetian Macao 澳门威尼斯人	2018-07-20	星岛日报	即时香港		320
丝丝讲场：腾讯Dan Brody论坛晒普通话	http://orientaldaily.on.cc/cnt/finance/20180714/00202_022.html	腾讯控股（00700）海外投资董事总经理Dan Brody系外国人，英文流利就预料之内！但估唔到佢连普通话都一样咁劲，仲改咗个中文名，叫做杨丹宁。 Dan日前出席Rise Hong Kong 2018创业科技论坛嘅时候，一直都用英文同主持人对话，不过讲讲吓就突然间弹咗句普通话：“连接一切”。主持人当堂吓一跳，然后笑住用普通话回应，“已经是非常地道的中国人”，引嚟场内一阵笑声。 高中开始学住埋内地 据了解，Dan由高中就开始学普通话，到咗大学都有继续研究，所以讲得一口标准嘅普通话。唔知Dan同主席马化腾又系用咩语言嚟沟通呢？ 睇番啲资料，Dan仲曾经修读南京大学中文证书课程，由九六年起就一直住喺中国，难怪佢普通话会咁流利。不过，由一一年开始，佢就“Living on a plane”，断估系因为份工要周围飞，要以飞机为家啦！ 余丝韵	2018-07-14	东方日报	财经新闻		427
同Yoon A斗过？朴敏英晒普通话吸内地粉 (10:36)	http://m.on.cc/nc/ent/20180713/20180713103605en.html	【on.cc东网专讯】凭“金秘书”一角再度于内地爆红的韩星朴敏英，眼见热播韩剧《金秘书为何那样》获大批剧迷追捧，朴敏英近日亦大晒流利普通话，录片跟内地粉丝打招呼，及宣传《金秘书为何那样》，盼粉丝多多期待，之后更甜笑派飞吻，其普通话发音获赞，绝对有望挑战“中文十级棒”的少女时代成员Yoon A。而她在微博的粉丝人数更多达529万，比拥有46万粉丝关注的《金》剧拍档朴叙俊高出十倍。	2018-07-13	东方日报	即时娱乐		192
朴敏英普通话挑战Yoon A内地人气赢拍档	http://orientaldaily.on.cc/cnt/entertainment/20180713/00288_006.html	凭“金秘书”一角再度在内地爆红的韩星朴敏英，近日大晒流利普通话，拍片向内地粉丝甜笑派飞吻，铺路宣传“限韩令”前已拍完的仓底内地剧，其发音获赞，有望挑战“中文十级棒”的少女时代成员Yoon A，而她在内地人气更高过拍档朴叙俊十倍。 内地实施近两年的“限韩令”已逐步放宽，有望于年底前解禁，朴敏英于2015年与内地男星张翰合作的内地古装剧《锦衣夜行》，亦有望于年内播出，难怪正忙于赶拍热播韩剧《金秘书为何那样》的朴敏英，亦不忘关注内地市场。眼见《金》剧未受“限韩令”影响，依然获大批内地剧迷追捧，她近日特地以普通话拍片打招呼及宣传《金》剧，盼粉丝多多支持，之后更甜笑派飞吻，顺道铺路为将于年内播出的陈年内地剧《锦》先行造势。 曾在内地逗留数月拍剧的朴敏英，普通话发音获赞标准，绝对可与圈中公认“中文十级棒”的少女时代成员Yoon A一较高下，而她在微博的粉丝人数更多达529万，比拥有46万粉丝关注的《…	2018-07-13	东方日报	国际娱乐		665
普通话男女山边放生曱甴	http://hd.stheadline.com/news/daily/hk/683272/	近日网上流传一段放生曱甴影片，一操普通话的中年男女被发现在荃湾永顺街山边斜坡坑渠处放生曱甴，称“房间太多，杀不了！”有区议员批评有关行径“离谱、过份”。食环署回应称，已派员进行防治虫鼠工作，暂未见有相关放生行动。 “房间太多，杀不了！” 荃湾区议员林琳前晚接获环宇海湾居民投诉，并在其facebook专页上载相关影片，批评“真系有冇搞错咁离谱！”片中显示一对操普通话的男女带了数个捕蟑器，在荃湾永顺街、环宇海湾往海滨花园的后楼梯旁放生曱甴，一名男途人上前质二人：“为什么放生牠们？” 男子解释：“因为房间太多。”街坊要求二人杀死曱甴，男子称：“怎么杀？杀不了！”事件惹起网民热议，质疑片中二人刻意放生曱甴，散播病毒，批评有关行为自私。 食环署：已派员跟进 林琳表示，首次遇到此类事件，指区内以住宅为主，卫生情况良好，担心放生影响地区生态，斥责二人行为“好过份！”她指，前晚已将事件交予食环署跟进，并…	2018-07-11	头条日报	港闻		523
放生曱甴 操普通话男女：太多杀不了	http://premium.mingpao.com/cfm/Content_News.cfm?Channel=gb&Path=134807149484/gzf1.cfm	【明报专讯】周街放生曱甴你见过未？民建联荃湾区议员林琳噚日喺facebook上载咗条片，片中一对讲普通话嘅男女正喺坑渠放生曱甴，而地点就喺荃湾环宇海湾。 片入面嗰对男女带咗几个捕蟑器去放生，拍片嘅男人问佢哋点解要周街放生曱甴，又批评佢哋无公德心。放生曱甴嘅男人解释：“房间太多（曱甴）”，又话“怎样杀？杀不了。” 林琳话段片系环宇海湾嘅街坊传畀佢，佢已经通知咗食环署，同喺荃湾选区选民WhatsApp群组上传有关资料，叫街坊帮手搜寻嗰对男女，啲街坊都觉得好嬲。食环署就覆佢话会喺事发地点灭虫，同埋派人喺嗰个地方监视呢对男女会唔会再放生曱甴。	2018-07-11	明报	港闻		294
荃湾普通话男女当街放生曱甴街坊怒斥影响环境卫生 19:45	http://std.stheadline.com/instant/articles/detail/762187-%E9%A6%99%E6%B8%AF-%E8%8D%83%E7%81%A3%E6%99%AE%E9%80%9A%E8%A9%B1%E7%94%B7%E5%A5%B3%E7%95%B6%E8%A1%97%E6%94%BE%E7%94%9F%E6%9B%B1%E7%94%B4+%E8%A1%97%E5%9D%8A%E6%80%92%E6%96%A5%E5%BD%B1%E9%9F%BF%E7%92	曱甴是人人得以诛之的害虫，但竟有人以“特别方法”处理，于公众地方放生家中捕捉到的曱甴，影响环境卫生。大批网民表示虽然行为并非违法，但直斥片段中的男女毫无公德心。 有网民于社交网站Facebook群组“巴打丝打 FacebookClub”上载一段短片，片中地点为荃湾近环宇海湾一带，一对操普通话的男女带了数个疑似捕蟑器的塑胶器皿，蹲在坑渠边怀疑放生器皿内的曱甴。拍摄的网民质问他们为何要这样做，放生曱甴的男子解释“房间太多（曱甴）”，因此捉来放生。当拍摄者进一步质问为什么不杀死曱甴时，他们先辨称不明白问题，然后又表示“怎么杀？杀不了”，最后以笑遮羞，收拾塑胶器皿离去。 拍摄者最后怒斥他们毫无公德心。网民看过片段后大表呕心，而且十分愤怒。有网民开玩笑的说，有关人士不单欠缺公德心，更可能造成生化灾难，警方一定要严正彻查。 荃湾区区议员林琳在facebook专页转载片段，并已将事件交给食环署跟进，又…	2018-07-10	星岛日报	即时香港		450
荃湾普通话男女当街放生曱甴 街坊怒斥影响环境卫生	http://www.stheadline.com/inews-content.php?cat=a&nid=154813	曱甴是人人得以诛之的害虫，但竟有人以“特别方法”处理，于公众地方放生家中捕捉到的曱甴，影响环境卫生。大批网民表示虽然行为并非违法，但直斥片段中的男女毫无公德心。 有网民于社交网站Facebook群组“巴打丝打 FacebookClub”上载一段短片，片中地点为荃湾近环宇海湾一带，一对操普通话的男女带了数个疑似捕蟑器的塑胶器皿，蹲在坑渠边怀疑放生器皿内的曱甴。拍摄的网民质问他们为何要这样做，放生曱甴的男子解释“房间太多（曱甴）”，因此捉来放生。当拍摄者进一步质问为什么不杀死曱甴时，他们先辨称不明白问题，然后又表示“怎么杀？杀不了”，最后以笑遮羞，收拾塑胶器皿离去。 拍摄者最后怒斥他们毫无公德心。网民看过片段后大表呕心，而且十分愤怒。有网民开玩笑的说，有关人士不单欠缺公德心，更可能造成生化灾难，警方一定要严正彻查。 荃湾区区议员林琳在facebook专页转载片段，并已将事件交给食环署跟进，又…	2018-07-10	头条日报	即时港闻		450
为传医术 自学普通话	http://124.243.200.100/a.php?f=20180710/gw-44.txt	【大公报讯】刘允怡在恩师裘法祖提议下，在80至90年代开始到内地培训专科医生，为了与内地同胞加强沟通，回归后，他特意请老师教他说普通话，由最基本的声母、韵母学起，经过五年半的学习，现时他已说得一口流利的普通话。 “我本身完全唔识普通话，唔识听、唔识讲，我1997年前去内地讲书都是用英文，但当时有人提醒我，回归后难免要用普通话，我又觉得中国人无理由不用中文，所以扚起心肝学普通话。” 刘允怡随即请了一名北京的女老师，逢星期六上堂，每堂一个半小时，由b、p、m、f开始学，一学便五年半，“老师说我是最有恒心的学生，同期一起学的医生都放弃了，只有我继续学，我现时普通话好流利！”	2018-07-10	大公报	香港特稿		311
【网上热话】荃湾普通话男女当街放生曱甴：房间太多杀不了 13:54	http://news.mingpao.com/ins/instantnews/web_tc/article/20180710/s00001/1531199706557	荃湾近日有一对操普通话的男女在环宇海湾放生曱甴。荃湾区议员林琳今早在facebook专页发布了一条影片，片中一对男女当街在坑渠放生曱甴。 林琳表示，昨晚收到环宇海湾的街坊传来一条影片，片中地点为荃湾永顺街、环宇海湾往海滨花园的后楼梯旁，一对操普通话的男女带了数个捕蟑器，在后楼梯旁的坑渠放生曱甴，拍摄的街坊当面质问他们为何要这样做，放生曱甴的男子解释“房间太多（曱甴）”。当街坊要求他们应杀死曱甴时，男子表示“怎么杀？杀不了”。 林琳指，昨晚已将事件交给食环署，请署方检视有否相关法例处理这两名人士，及在荃湾选区选民WhatsApp群组上传有关资料，请街坊一同搜寻该对男女。林琳称，收到相关消息的街坊都十分愤怒，林琳又指这是她第一次遇到此类事件。 林琳表示，食环署今早回覆她，称会在该地点灭虫，及派员在该地点监视这对男女会否再放生曱甴。 《明报》记者正向食环署查询事件。	2018-07-10	明报	即时港闻		431
【普通话教与学】粤普译名异 我的梅西你的美斯	http://paper.wenweipo.com/2018/07/10/ED1807100017.htm	最近全世界都在谈论一个热门话题，就是四年一度的世界杯。 各大报章每天都刊登很多相关的足球新闻。我们作为普通话老师，对这些大事当然也要了解一下，上课的时候跟学员一起结合生活，用普通话聊聊话题，引起他们学习普通话的兴趣。 前几天上课之前，有一个学员来早了，于是就跟我聊天，问我有没有看世界杯，他说他很喜欢英格兰的“卡尼”，说是很厉害，级别可以媲美阿根廷的“美斯”和葡萄牙的“C朗”。 我一听，职业病马上就犯了，当然不会放过这个机会，就跟他说，英格兰的这个球员，我们叫“凯恩”，阿根廷的球员叫“梅西”，葡萄牙的C朗，我们则叫“C罗”。 学员听完后，马上就说：“哦，原来是这样，难怪我上网看球赛的时候，评论员说的那些球员，我都不知道是谁，原来是粤语和普通话的说法都不一样。” 这位学员说得没错，因为这些球员的名字都是由外文翻译过来的，所以内地和香港就有不同的说法，比方说法国球员“普巴”和“基沙文”，普通话…	2018-07-10	文汇报	新闻透视眼		1027
每日一片：山边放生曱甴 操普通话夫妇：唔知点处理 (14:30)	http://m.on.cc/nc/hknews/20180710/20180710143029lc.html	【on.cc东网专讯】正当大家想尽办法杀灭曱甴，有人却疑将曱甴放生。日前有男途人行经荃湾永顺街山边斜坡时，发现一对操普通话的中年夫妇在山边坑渠放生一批曱甴，男途人出言指摘对方行径没有公德心，惟对方却解释：“太多，杀不了！”，示意放生是唯一途径。 该名男途人拍摄的片段今日(10日)在网上流传，片段开始，两夫妇一蹲一站在山边坑渠位，地下则放满数个被称是捕蟑螂神器的器皿，该名男途人见状便说：“呢啲系曱甴喎，系咪？”，操普通话的女子回应说听不懂，男途人于是以半咸半淡的普通话再问对方为何要放生曱甴，男子没有否认，只说“太多”，男途人愈说愈劳气，直指曱甴是害虫，应该杀死牠，但男子却反驳说“怎样杀，杀不了！”，男子随即收起捕蟑螂神器，不过对于男途人指骂他们有欠公德，他就显得一副嬉皮笑脸模样。 网民看过片段后，形容情况太恐怖，“你要放生，点解唔放喺自己屋企，而要放喺公众地方？”、更讽刺对方此举是“弃养”…	2018-07-10	东方日报	即时港闻		488
普通话妇称被狗咬 事后疑索偿 面店轰屈钱 (18:21)	http://m.on.cc/nc/hknews/20180710/20180710182143lc.html	【on.cc东网专讯】上水再爆中港矛盾！有拉面店老板在Facebook专页发贴，称遇到“讲普通话嘅屈钱党”，指对方在其店铺门口声称遭狗咬伤，要求赔偿。贴文发出后引起街坊热烈回响，并引来被指控的一方“踩场”留言，骂战一触即发！ 老板在贴文表示：“早排遇到讲普通话嘅屈钱党，话我哋只冇牙狗仔Mini咬到佢只脚瘀咗…第2日坐门口拎埋支铁棍，问我哋点处理…第3日又嚟话其实想拎番几百蚊啫，你终于开口啦，（我）一蚊都唔会畀呀”。 街坊皆力撑老板，不过被指控“屈钱”的妇人，却透过朋友在贴文下留言，道出另一个版本。她强调自己当时的确是遭狗咬伤，并通知了警方和渔护署，事后更去了医院。而她每次到店铺交涉时，“警察都在现场，不存在诈骗钱财的情况”。 事实上，该拉面店的日裔老板娘山下小姐，早在2015年已因大骂水货客而广受关注，今次事件再次掀起一场中港矛盾。店家、街坊和被指控的内地客各不相让，你又帮哪边？	2018-07-10	东方日报	即时港闻		430
网民热话：贪平唔住酒店？普通话团疑进驻渡假营 (16:48)	http://m.on.cc/nc/hknews/20180709/20180709164856lc.html	【on.cc东网专讯】暑假将至，渡假营是不少本地家庭、学校、团体的抢手康乐活动场地，但昨日（8日）有网民发现，保良局辖下的一个元朗渡假营，疑遭普通话旅行团“进驻”，并拍下影片为证。影片所见，至少数十名拖箧客乘旅巴而至。有网民怒斥：“霸占本地市民可租借场地，有冇搞错？” Facebook群组“PLAY HARD 玩硬”今日（9日）上午转载了有关片段，片中可见，大棠渡假村的停车场停泊了数辆旅游巴，团员正将行李带入营地，部分人蹲在地上，期间有操普通话男子大叫：“快点！”发文者质疑：“冇钱住市区酒店，要玩到入郊区渡假营？” 资料显示，保良局辖下的渡假营获政府拨地，于郊野公园范围兴建，旨在提供非牟利康乐渡假营服务予广大市民。据了解，申请渡假营宿位，每个团体之负责人或领队需为18岁或以上之香港永久居民，并必须随团入营。本报正向保良局了解详情。 有网民直言，接受资助营运的团体，应以香港人利益优先，尤其…	2018-07-09	东方日报	即时港闻		654
对说普通话的歧视	http://skypost.ulifestyle.com.hk/article/2110702/	一天，提着行李箱的女友人从东涌返回市区的列车上，与另一也是提着行李箱的女子，在两个“关爱座”坐下后，一个闭目休息，一个则开始使用手机。 列车抵达下一站时，进入车厢的乘客中有一对夫妇，丈夫抱着儿子，太太推着儿子的婴儿车。这时，正使用手机的女友人抬头看见他们便随即起来让座给抱着孩子的男士，说︰“你坐吧！” 女友人是在英国出生的香港人，自幼只说英语和学普通话，那天她经香港到内地游玩，先到东涌一游。当她以普通话跟那男士说话时，男士身旁的太太便代答︰“不用了。” 没多久，闭目休息的那个醒了，她张开眼看见有抱着孩子的人便起来让座，同样对男士说︰“你坐吧！”那男士身旁的太太同样代答，不过，她这次不单说“不用了”，还有“唔该你”的点头道谢，且说了两次，跟之前对女友人的冷淡和没带半点笑容的反应判若两人。 那太太以这反应来回应那位说广东话的女士，女友人说︰“这是她表达了对说普通话的我的歧视反应。还以为港人歧…	2018-07-09	晴报	亲子		516
欧洲太空人赴中国训练 努力学普通话 15:09	http://news.mingpao.com/ins/instantnews/web_tc/article/20180707/s00005/1530946508562	去年，德国太空人莫勒（Matthias Maurer）在山东烟台一间新建的培训中心，进行两星期的海上求生训练。他们和中国航天员一起参加训练，起居饮食也一起，令他们印象深刻，形容和在美国训练的截然不同。 莫勒形容，在中国的生活美好惬意，和中国航天员住在同一栋大厦，吃同样的食物，连假日也一起相处，就像兄弟姊妹一样。他表示，曾在美国休斯顿训练，当时租住公寓，只有训练的两三小时才看到同伴，更有专门的团队活动促进航天员之间的合作，但中国人促进关系的方法更直接。 中国的神舟飞船是基于苏联的联盟号宇宙飞船设计，莫勒对神舟飞船的直径比联盟号大很多感到惊讶。在太空舱返回地球时，神舟的设计令更换服装、从太空舱里爬出来更容易。他又指，神舟飞船配备充气船，与联盟号不同，因此在俄罗斯的海洋求生训练时要跳入寒冷的水中，在中国训练则更易。 莫勒也和其他太空人一起学习普通话。他表示欧洲多国的人民说不同语言，本身已有跨文…	2018-07-07	明报	即时国际		784
不准陈豪教孩子普通话 陈茵媺空中庆祝结婚周年	https://www.am730.com.hk/news/%E5%A8%9B%E6%A8%82/%e4%b8%8d%e5%87%86%e9%99%b3%e8%b1%aa%e6%95%99%e5%ad%a9%e5%ad%90%e6%99%ae%e9%80%9a%e8%a9%b1-%e9%99%b3%e8%8c%b5%e5%aa%ba%e7%a9%ba%e4%b8%ad%e6%85%b6%e7%a5%9d%e7%b5%90%e5%a9%9a%e5%91%a8%e5%b9%b4-132375	陈茵媺(Amiee)昨日参加全港首个甚具规模的网上儿童语言发展平台及训练计划启动礼，Amiee表示，自己和丈夫陈豪(阿Mo)的母语都是英语，因此不准阿Mo教儿子中文；问到与阿Mo如何纪念结婚5周年，Amiee指，阿Mo非常有心思，安排在直升机上和她庆祝。 Amiee指，她与丈夫阿Mo的母语都是英语，担心教不好儿子的中文，她说：“我同啲仔女沟通好多时都系用英语，好担心佢哋嘅普通话同粤语学得差，本来阿Mo有试教过佢哋，不过我唔俾呀，都系交俾专业嘅老师教好啲。” 暑假携子回加拿大 早前是Amiee和阿Mo结婚5周年，Amiee 大赞丈夫非常贴心地准备了一个直升机之旅，Amiee甜笑称：“因为小朋友都喺屋企，所以我哋唔可以去太远，飞咗上天空，就感觉自己去咗第二个地方旅行。”Amiee又指，二人其后去了澳门吃晚饭：“觉得同阿Mo简简单单食餐饭已经好浪漫。”暑假将至，Amiee将携3个小孩子加拿大游…	2018-07-05	am730	娱乐		463
奇妙电视英文台月底启播 每日播4小时普通话节目 望大湾区落地 21:11	http://news.mingpao.com/ins/instantnews/web_tc/article/20180705/s00001/1530793535160	奇妙电视开台逾一年，将于本月底设英文频道“香港国际财经台”，主打财经新闻及资讯，每日亦设4小时普通话节目。有线宽频通讯有限公司主席邱达昌说，看准未来大湾区机遇，将与广东电视台加强合作，料届时可互相播放对方的节目。 邱达昌说，本港为金融中心，有空间发展英文财经台，已跟员工提及“希望有抱负，整到个台好财经化”，亦见大湾区发展对港帮助大，大湾区市场有6600万人，当中有很大商机，希望英文台“在大湾区落地”。 邱又说，未来会加强与广东电视台合作，现有一节目“食在广州”由两台合作制作，盼未来可做到互相播放对方的节目。至于有关奇妙电视的营运情况，邱说，收视与ViuTV相若，亦看到广告收益上“有进步”。 有线电视新闻执行董事赵应春亦负责“香港国际财经台”，他说，此英文台与另外两间免费电视台的定位不一样，他们主打英文财经节目，另加每日4小时普通话节目，主要在交易时段内播放，希望走一条不一样的路。 他又说…	2018-07-05	明报	即时港闻		712
【即时娱乐】陈茵媺唔准陈豪教仔女普通话	https://www.am730.com.hk/news/%E5%A8%9B%E6%A8%82/%e3%80%90%e5%8d%b3%e6%99%82%e5%a8%9b%e6%a8%82%e3%80%91%e9%99%b3%e8%8c%b5%e5%aa%ba%e5%94%94%e5%87%86%e9%99%b3%e8%b1%aa%e6%95%99%e4%bb%94%e5%a5%b3%e6%99%ae%e9%80%9a%e8%a9%b1-132287	陈茵媺(Amiee)今日参加全港首个甚具规模的网上儿童语言发展平台及训练计划启动礼，Amiee表示，自己和丈夫陈豪(阿Mo)的母语都是英语，她说：“我同啲仔女沟通好多时都系用英语，好担心佢哋嘅普通话同粤语学唔好，本来阿Mo有试过教佢哋，不过我唔俾呀，都系交俾专业嘅老师教好啲。”	2018-07-04	am730	娱乐		141
【普通话教与学】前后鼻音分不清 游天坛变上天堂	http://paper.wenweipo.com/2018/07/03/ED1807030017.htm	前后鼻音是南方人学习普通话的一个难点。老师上课会教大家舌头向前伸、舌根隆起、鼻腔打开，气流要从鼻子里透出，再加一句“手指放在鼻翼上，看看有没有震动？”接着，就是示范指导嘴巴开合的大小、舌头滑动的方向。同学们依葫芦画瓢，就能基本掌握发音的方法。以上大概就是同学们学习前后鼻音的共同经历。 然而，学会基本发音，并不代表能说好普通话，相信同学们深有体会。笔者印象较深的一件趣事，是在一节讨论北京之旅的课堂上，同学们分享自己去北京旅游的经历。一名同学向大家介绍说：“我们那次不但去了长城，还去了天堂。”“那天堂美吗？”重复一次这个词语，同学就明白过来，自己该是闹笑话了。 学会基本发音之后，同学们可以通过前后鼻音词语的发音练习，不断训练舌头前伸、后升，找到发音窍门，例如： an-ang：担当、南唐、染烫 ang-an：伤寒、航站、莽汉 再做几个词汇对比练习，加深印象： 1. 反问－访问 2. 担心－当心…	2018-07-03	文汇报	南北直通车		1587
【普通话大世界】“分分钟”逆袭成功	http://paper.wenweipo.com/2018/07/03/ED1807030019.htm	改革开放之初，不少香港使用的粤语词或社区词，随着粤语流行歌和香港影视节目北上神州，逐渐为内地人熟悉，现在已经成为内地的日常用语，比如“的士”、“巴士”、“买单”等。 如今香港已经回归二十多年了，内地与香港各个方面的交流愈来愈频繁、深入。 语言方面，内地的一些词语进入了香港的语言生活。国家发展的概念比如“中国梦”、“一带一路”等，源于内地的新事物比如“淘宝”、“小米”、“（微信）朋友圈”等，乃至内地的一些惯用表达比如“迎难而上”、“抓紧机遇”等，均已融入香港的语言生活，就连“小三”这个在香港本指“小学三年级”的词也有了新的含义。 “中国速度”之下的内地社会，各方面的发展日新月异，新词新语迭出，这些词语进入香港，是很自然的。 然而，一个有趣的现象是，近几年仍然有一些香港的词语成功“突围”，进入内地。借用一个潮语，可称之为“逆袭”，“分分钟”就是这样一个词。 粤语的“分分钟”与普通话的“随时”…	2018-07-03	文汇报	南北直通车		1128
高学历少数族裔青年求职困难 中文及普通话成障碍	http://www.stheadline.com/inews-content.php?cat=a&nid=148228	一项研究显示，学历达中六至高中的少数族裔青年失业率高达6成，高学历的少数族裔青年的失业问题严重。调查亦反映，少数族裔青年即使有高学历，也未能跳出蓝领工作。在求职过程中，中文及普通话成为少数族裔青年的障碍。 研究是由岭南大学文化研究副教授梁旭明及天主教劳工牧民中心联手进行，于今年上半年，以问卷访问了172位少数族裔人士。调查发现，持高中或中六学历的少数族裔青年失业率高达61.1%，而初中及小学程度的青年分别为18.75%及16.67%。部份职业如文员、教育及社工，求职更见困难。 团体发现，少数族裔就业困难有恶化趋势，随香港回归，大多基层行业如保安、速递及侍应等，除要求使用广东话，也要求能操基本普通话；另外一些行业的专业考牌制度，亦加入中文入职要求，为就业添障碍。 调查发现，逾6成受访少数族裔青年未曾使用劳工处就业服务，另有57%受访者认为该劳工处未能协助他们，反映劳工处未能切合青年求职需要…	2018-07-02	头条日报	即时港闻		473
高学历少数族裔青年求职困难中文及普通话成障碍 17:01	http://std.stheadline.com/instant/articles/detail/755407-%E9%A6%99%E6%B8%AF-%E9%AB%98%E5%AD%B8%E6%AD%B7%E5%B0%91%E6%95%B8%E6%97%8F%E8%A3%94%E9%9D%92%E5%B9%B4%E6%B1%82%E8%81%B7%E5%9B%B0%E9%9B%A3+%E4%B8%AD%E6%96%87%E5%8F%8A%E6%99%AE%E9%80%9A%E8%A9%B1%E6%88	一项研究显示，学历达中六至高中的少数族裔青年失业率高达6成，高学历的少数族裔青年的失业问题严重。调查亦反映，少数族裔青年即使有高学历，也未能跳出蓝领工作。在求职过程中，中文及普通话成为少数族裔青年的障碍。 研究是由岭南大学文化研究副教授梁旭明及天主教劳工牧民中心联手进行，于今年上半年，以问卷访问了172位少数族裔人士。调查发现，持高中或中六学历的少数族裔青年失业率高达61.1%，而初中及小学程度的青年分别为18.75%及16.67%。部份职业如文员、教育及社工，求职更见困难。 团体发现，少数族裔就业困难有恶化趋势，随香港回归，大多基层行业如保安、速递及侍应等，除要求使用广东话，也要求能操基本普通话；另外一些行业的专业考牌制度，亦加入中文入职要求，为就业添障碍。 调查发现，逾6成受访少数族裔青年未曾使用劳工处就业服务，另有57%受访者认为该劳工处未能协助他们，反映劳工处未能切合青年求职需要…	2018-07-02	星岛日报	即时香港		473
美谐星扮议员与特朗普通话	http://stepaper.stheadline.com/news_content.asp?newsid=A22057.txt&newscat=A3&newsdate=2018-07-01	美国喜剧演员约翰梅伦德斯（John Melendez），日前扮成新泽西州参议员梅嫩德斯（Robert Menendez），成功和总统特朗普通电话，谈及有关近期引起争议的移民问题，以及最高法院大法官肯尼迪的退休计划。两人的电话录音在梅伦德斯主持的清谈节目上公开，他认为此事反映出，很容易就接触到总统。他说，在六月二十七日致电白宫，自称是梅嫩德斯的助手，指梅嫩德斯想和特朗普倾谈。最终他成功和身处空军一号专机上的特朗普对话。梅伦德斯在节目上公开的两人对话录音，显示特朗普不虞有诈，在电话中说：“你遭遇了很艰难的情况，我不认为这是十分公平的情况。”梅嫩德斯曾被指涉及贪污受查，但最终脱罪。而白宫暂未就今次事件置评。综合报道	2018-07-01	星岛日报	国际		310
与胡鸿钧传授广播剧技巧 菊梓乔自认普通话一般	http://www.singpao.com.hk/index.php?fi=news4&id=74856	歌手菊梓乔（Hana）与胡鸿钧昨日到港台参与《普出广播剧校园精彩大舞台》记者会，跟学生分享制作及演出广播剧技巧，从中活学活用普通话。 问到Hana普通话讲得好吗？她说：“我之前去过台湾比赛，勉强可以令人明白同沟通到，亦试过自己写国语歌，但如果唱都要写下拼音，其实都需要恶补。” 邀请学生上台试演 她又表示自己录广播剧的经验不多，还记得第一次为职安健录广播剧时，因为没有演出经验，所以无乜反应，其后经前辈指导，第二三次录就好好多，她又透露有机会客串剧集演出。 胡鸿钧则以电视剧人气角色“石敢当”的语气参与演出，他们还即席邀请学生上台试演，接着，Hana及胡鸿钧分别与学生组队进行比拼，以道具为广播剧配上音效，让学生了解音效是制作播剧的重要元素，以及讲解如何选择合适的音效为广播剧混音。Hana及胡鸿钧又即席献唱助兴，为学生打气。	2018-06-29	成报	娱乐		409
浸大保留普通话及格毕业要求	http://www1.hkej.com/dailynews/article/id/1876920/	香港浸会大学昨召开教务议会，虽然6名出席的本科生代表均表示反对，但最终以大比数通过保留普通话毕业试要求的建议；并同时通过于下学年开始推出不计入大学总成绩的普通话课程，并为国家语委普通话水平测试提供全额资助。 两个就普通话毕业要求而召开的工作小组向教务议会提交报告，表明两小组认同保留原有毕业要求，即本地学生必须取得普通话试及格成绩方可毕业；然而，小组提出两点建议，一是预计下学年起校方会将现有的普通话课程改成不计累积成绩平均积点（cGPA），二是校方将全数资助学生考国家语委普通话水平测试，成绩达三甲水平的学生即可豁免普通话毕业试要求。 教务议会传理学院代表黄芷桥透露，在席约50名议会成员中的6名本科生代表全部投反对票，同时有一名研究生代表反对。 两个工作小组仍会继续运作，并承诺就新通过的两个方案作恒常检讨，惟目前仍未定下检讨的频率及时间。 学生代表称校方敷衍 浸大临时行政委员会主席兼教务议会…	2018-06-28	信报	政坛脉搏		830
浸大保留普通话毕业试 学生会：换汤不换药	https://www.am730.com.hk/news/%E6%96%B0%E8%81%9E/%e6%b5%b8%e5%a4%a7%e4%bf%9d%e7%95%99%e6%99%ae%e9%80%9a%e8%a9%b1%e7%95%a2%e6%a5%ad%e8%a9%a6-%e5%ad%b8%e7%94%9f%e6%9c%83%ef%bc%9a%e6%8f%9b%e6%b9%af%e4%b8%8d%e6%8f%9b%e8%97%a5-131657	浸会大学(图)的普通话毕业要求，年初引起争议。校方设立两个工作小组作出检讨。浸大教务议会昨午开会，讨论小组提交的报告书。议会通过保留普通话毕业试要求，即学生需取得合格才能毕业，但学生可选择不将普通话课程的分数，计入学生大学总积点。另外，若学生完成校方开办的国家语委普通话水平测试预备班，考试费可获资助；而自行报考的学生，如考获三级甲等或以上成绩，亦可退回全数考试费。 浸大学生会署理会长雷乐希指，学生会是要求取消普通话毕业要求，校方现时提出中期方案，只想淡化事件，换汤不换药，表明不会接受。	2018-06-28	am730	新闻		258
浸大维持普通话毕业要求	http://paper.wenweipo.com/2018/06/28/ED1806280009.htm	（记者 文根茂）浸会大学有学生早前以不满普通话毕业要求为由，“占领”语文中心及威吓教职员引起连串风波。校方其后成立的两个检讨工作小组昨日向教务议会提交报告，获讨论通过，新方案提出维持普通话毕业要求，但校内普通话课程可不计入成绩，学生如报读国家语委普通话水平测试（PSC）预备班，考试费也可获全数资助，至于校内豁免试的检讨工作，则仍在进行中。 浸大的两个工作小组成员包括师生代表及校内专家，分别检视学生两文三语的毕业要求，及商讨如何评估学生的普通话能力。 分数可不计入成绩 浸大昨日召开教务议会讨论小组报告，决定维持现时对毕业生语文能力要求及带学分普通话课程，但容许学生选择，让普通话课的分数不计入大学成绩总积点，只以优秀 / 合格 / 不合格标示。 此外，对于不修读学分普通话课的学生，教务议会亦批准其修读校方提供的PSC预备班，不论成绩如何，考试费皆可获全数资助；而没有修读预备班的同学，如考获三…	2018-06-28	文汇报	新闻透视眼		602
检讨豁免试九月交建议书浸大普通话课程可选不计大学成绩	http://stepaper.stheadline.com/news_content.asp?newsid=F01147.txt&newscat=F&newsdate=2018-06-28	浸会大学规定学生达普通话要求才可毕业。教务议会昨通过两项修订，同学可选择普通话课程分数不计算入大学总成绩（cGPA），但至少要取得及格；学生亦可选读校方办的国家语委普通话水平测试（PSC）预备班，由校方代缴应考PSC，达标即可豁免读普通话。两项建议最快九月实施。学生代表批评修订是换汤不换药，会继续争取废取普通话毕业要求。 浸大现时设普通话毕业要求，令部分学生不满。两个检讨普通话毕业生要求的工作小组，向教务议会提交报告书。教务议会昨开会，最终在所有学生代表反对下，大比数通过两个小组的建议。 两份报告书均同意保留普通话毕业要求，但提出两项建议。现时浸大生要达普通话能力毕业要求，选择之一是完成三个学分的普通话课程，新建议下，同学可选择该课程的成绩是否计算入cGPA，如同学选择不计，其成绩将会以“优秀”、“及格”及“不及格”标示，惟学生仍须取得及格才符合要求。 若学生选择不修读普通话课程，校方亦…	2018-06-28	星岛日报	教育	魏绮婷	934
浸大暂保留普通话毕业要求	http://hd.stheadline.com/news/daily/hk/679871/	浸会大学普通话毕业要求早前引起争议，校方其后设立两个工作小组作检讨。教务会昨召开会议检讨小组提交的报告，最终以大比数通过暂时保留普通话毕业要求，并修订普通话课程分数不计入学生大学总积点。而符合条件的学生可获全额资助国家语委普通话水平测试。浸大学生会署理会长雷乐希出席会议后，表明不接受方案，批评校方想淡化事件，其实“换汤不换药”，重申学生会的立场是取消普通话毕业要求，期望校方交代为何其政策与其他大学不一样，但暂无计划采取后续行动。	2018-06-28	头条日报	港闻		218
浸大维持普通话合格毕业要求	http://orientaldaily.on.cc/cnt/news/20180628/00176_040.html	【本报讯】香港浸会大学年初曾爆发学生不满毕业需普通话测试的争议，昨日该校教务议会举行约三小时会议，通过两项修定，包括让学生选择不把普通话课程分数计入成绩总积点（CGPA），以及扩大资助学生参加国家语委普通话水平测试（PSC），会中没有直接讨论是否取消普通话毕业要求，学生代表质疑校方故意淡化问题。 通过分数可不计入CGPA 浸大在年初成立两个工作小组，分别讨论如何评估学生普通话能力，及检讨两文三语政策，包括应否设立普通话毕业要求。两个小组向教务议会会议递交的报告书均同意，保留现存的普通话毕业要求，包括需于普通话课程中取得合格成绩，或于PSC取得三甲或以上成绩；报告书另建议让学生选择不把普通话课程分数计入CGPA，而于PSC中考获三级甲等或以上成绩的学生所获的考试费资助，亦由三百元增加至全费八百元。 有份出席会议的浸大学生会临时行政委员会主席雷乐希表示，在所有学生代表反对下，报告书获大比数通…	2018-06-28	东方日报	港闻		558
浸大通过普通话不计GPA 学生会批换汤不换药	http://premium.mingpao.com/cfm/Content_News.cfm?Channel=gb&Path=168508243805/gfd1.cfm	【明报专讯】浸会大学昨召开教务议会会议，议程包括讨论是否通过学生修读占3个学分“实用普通话”，但毋须计入总积点（cGPA），以及是否全数资助学生报考国家语委普通话水平测试（PSC）的费用，两项建议在大比数下获通过。换言之，新学年（2018/19年）将推行新措施。浸大学生会署理会长暨教务议会学生代表雷乐希批学校“换汤不换药”，新措施仍要学生修读普通话。 浸大成立两个小组，分别研究如何记录毕业后学生的普通话能力，以及检讨两文三语政策，两小组昨提交建议报告。第一个小组建议学生可修读较简单的“实用普通话”，计学分而不用计cGPA，以及全数资助在PSC中考获三级甲等或以上成绩的学生。雷乐希在会上重申应废除普通话毕业要求，另据悉有学生在会上曾提出“实用普通话”以不计学分形式修读，认为会影响“想修读其他科目的学生”，亦有学生表示两文三语政策应用在所有学生，包括海外学生身上。 所占学分待讨论 有关建议是…	2018-06-28	明报	教育		585
浸大议普通话要求 学生会称不接受中途方案 (14:58)	http://m.on.cc/nc/hknews/20180627/20180627145857lc.html	【on.cc东网专讯】浸会大学以普通话作为毕业要求早前引起争议，该校教务议会今午(27日)开会讨论修订该项毕业要求。学生会临时行政委员会主席兼教务议会当然成员雷乐希会前表示，目标是取消普通话毕业要求，并不接受中途方案。 被问及有没有信心达成目标，他指要运用资料去说服老师，证明普通话对学生来说不甚重要，例如政府2016年的统计数据，显示普通话在香港的使用率低，有2017年出版的学术论文亦显示普通话在工作及日常使用率低。另有雇主报告显示，对毕业生的期望中，普通话并不重要。	2018-06-27	东方日报	即时港闻		249
浸大保留普通话毕业要求 学生可选择不纳累积成绩	http://www.stheadline.com/inews-content.php?cat=a&nid=144676	浸会大学学生年初“占领”语文中心抗议普通话豁免试的合格标准过高。浸大今日与学生代表举行会议，会议以大比数通过两个工作小组报告书，决定暂时保留普通话毕业要求，并采纳推出一个计学分但不计入累积成绩平均点课程的建议。 浸大学生会署理会长雷乐希表明，不会接受中期方案，称学生会是要求取消普通话毕业要求，批评现时提出中期方案，尝试淡化诉求。他希望，校方坦诚及有理据地指出必修普通话科的原因，暂时无计划采取后续行动。 会议亦通过，全数资助报考国家语委会普通话水平测试的建议，同学直接报考测试，获三级甲等或以上成绩也能毕业；或先完成语文中心开办的预备班，报考测试可获校方全费资助。	2018-06-27	头条日报	即时港闻		307
浸大保留普通话毕业要求学生可选择不纳累积成绩 19:58	http://std.stheadline.com/instant/articles/detail/751705-%E9%A6%99%E6%B8%AF-%E6%B5%B8%E5%A4%A7%E4%BF%9D%E7%95%99%E6%99%AE%E9%80%9A%E8%A9%B1%E7%95%A2%E6%A5%AD%E8%A6%81%E6%B1%82+%E5%AD%B8%E7%94%9F%E5%8F%AF%E9%81%B8%E6%93%87%E4%B8%8D%E7%B4%8D%E7%B4%AF%E7%A9	浸会大学学生年初“占领”语文中心抗议普通话豁免试的合格标准过高。浸大今日与学生代表举行会议，会议以大比数通过两个工作小组报告书，决定暂时保留普通话毕业要求，并采纳推出一个计学分但不计入累积成绩平均点课程的建议。 浸大学生会署理会长雷乐希表明，不会接受中期方案，称学生会是要求取消普通话毕业要求，批评现时提出中期方案，尝试淡化诉求。他希望，校方坦诚及有理据地指出必修普通话科的原因，暂时无计划采取后续行动。 会议亦通过，全数资助报考国家语委会普通话水平测试的建议，同学直接报考测试，获三级甲等或以上成绩也能毕业；或先完成语文中心开办的预备班，报考测试可获校方全费资助。	2018-06-27	星岛日报	即时香港		307
浸大拟保留普通话合格毕业要求	http://orientaldaily.on.cc/cnt/news/20180627/00176_045.html	【本报讯】浸会大学要求毕业生需普通话符合要求一事引发连串争议，校方今日会举行教务会议讨论，据知校方拟让学生选择不把普通话课程成绩计入总成绩（CGPA），但学生仍须合格才能毕业。浸大学生会临时行政委员会主席兼教务议会当然成员雷乐希表示，大学强制同学学习普通话实属多此一举，希望校方能从善如流，取消普通话毕业要求。 研供学生选择不把成绩列入CGPA 自部分学生早前占领浸大语文中心后，校方便成立工作小组讨论如何评估学生普通话能力，及检讨两文三语政策。据了解，小组其中一个建议方案是保留普通话毕业要求，但普通话课程成绩不计算入总成绩，并研究全数资助学生应考国家语委普通话水平测试；至于普通话豁免试的存废问题，则暂未有定案。 不少浸大学生反对保留普通话毕业要求，雷乐希强调同学不是为反而反，因同学既非使用普通话思考，学习也不太实用，即使校方经常提出普通话在香港很实用，此说却站不住脚，雷乐希引述政府统计处于…	2018-06-27	东方日报	港闻		537
极丢架！普通话男爆粗羞辱日本女球迷：X你 (12:37)	http://m.on.cc/nc/sports/20180627/20180627123748sp.html	【on.cc东网专讯】 世界杯决赛周除咗系各国球员比试球技嘅舞台，亦系全球球迷展示国民质素嘅地方，近日就有一段疑似大陆人辱骂日本女粉丝嘅影片流出，引起极大争议。 据报喺日本对塞内加尔嘅赛事，有一位讲普通话嘅男人场外扮做访问，对象系一位着日本波衫嘅少女，未有出镜嘅疑似大陆男人话：“你是日本人吗？你们今天球赛输死，X你祖宗！输死你小日本...”不过女球迷似乎完全听唔明佢讲乜，全程一直保持微笑，后来另一个人用英文问佢系咪日本人，呢位少女先至答“系”，影片亦随即完结。 影片曝光后，大部份网民都炮轰个疑似大陆男人“极丢架”，尤其中国队连世界杯决赛周都入唔到，球迷反而走去“打嘴炮”羞辱踢得出色嘅日本。内地网民纷纷怒轰片段中辱骂日女的男子，“真丢人，一个大老爷们欺负小姑娘算啥本事”。也有人斥责男子学哥伦比亚贱男劣行，系“不懂礼义廉耻”。 其实日本女球迷“被玩”已经唔系今届第1次，之前有哥伦比亚人呃日本…	2018-06-27	东方日报	即时体育		522
浸大教务议会商讨普通话毕业要求 15:17	http://192.168.0.5/hkejjs/2018-06-27/1876166.html	浸会大学普通话事件今年初曾引起争议，浸大教务议会下午开会，讨论两个检讨普通话毕业要求的工作小组提交的报告书。 浸大学生会临时行政委员会主席雷乐希表示，会在会上说服校方，期望最终能通过取消普通话毕业要求，让同学自由选择修读科目，又表明不接受校方任何中途方案。	2018-06-27	信报	即时时事脉搏		141
浸大普通话课程倡不计成绩	http://premium.mingpao.com/cfm/Content_News.cfm?Channel=gb&Path=101104936263/gbn1.cfm	【明报专讯】香港浸会大学普通话毕业要求早前引发争议，有学生因不满普通话豁免试评分标准到语文中心抗议。校方其后成立两个工作小组，料明天提交相关报告至教务议会。据悉其一小组未能就毕业要求达成共识，另一小组提出，修读普通话学分课程及考试，但建议普通话课程分数，可不计算在学生大学总成绩（cGPA），并研究全数资助学生应考国家语委普通话水平测试（PSC），惟针对豁免试的检讨则未有定案。 毕业要求小组未达共识 两个小组成员包括学生代表、教职员和校外专家，首个小组分别讨论如何评估学生普通话能力，另一小组是检讨两文三语政策，包括应否设立普通话毕业要求。据了解，在检讨两文三语政策的工作小组上，有成员质疑大部分同学在中小学时已曾修读普通话，认为普通话对学生学习生涯无帮助，建议取消毕业要求，惟另有成员指出，中学文凭试并无考核学生普通话能力，故双方不能达成共识。 现时浸大学生要完成普通话毕业要求，可选择︰一）报…	2018-06-26	明报	港闻		778
学好普通话， 不仅是 为了“说话”	http://paper.ce.cn/jjrb/html/2018-06/24/content_365844.htm	不学汉语、不识汉字、不懂普通话，会怎么样？ 前些日子，国家语言文字工作委员会发布了《中国语言生活状况报告（2018）》，其间，勾勒出语言文字与贫困之间的某些联系。 《中国农村扶贫开发纲要(2011—2020年)》划定了14个集中连片特困地区作为扶贫脱贫工作的重点。他们有一个共同点是普通话普及率不高，基本上都呈现出了语言或方言较为复杂的状态：这14个特困地区中有11个地区涵盖少数民族居住区，基本上覆盖了北方、吴、湘、赣、客家、闽、越等几大方言区及内部一些次方言区，有好几个地区还处于两大或几大方言区交界地区，方言使用情况更为复杂。 语言交流障碍，往往会阻碍劳动力在市场中的流动。研究表明，在一国内部，会说通用语言者比只会说本族语言者的收入要高，而双语教育与经济收入之间基本呈现正相关的方式。曾有学者认为中国少数民族社会经济地位相对滞后是因为其教育水平滞后，但是中国劳动力调查等大量第一手数据证明，…	2018-06-24	北京经济日报	周末		1262
课文“外婆”改“姥姥”沪教委擅改用词捱轰普通话代方言扼杀多元文化	http://stepaper.stheadline.com/news_content.asp?newsid=A28072.txt&newscat=A2&newsdate=2018-06-22	上海市小学语文课本的一个“普通话”词语，昨日引起许多网民的不满。原来课文主人翁“外婆”被上海市教学委员会擅自改成了“姥姥”，官方解释称“姥姥是普通话，外婆是方言”。上海乃至华南多地网民集体大炮轰，反驳称“姥姥”才是方言，不是主流用词，“难道以后要用《姥姥的澎湖湾》？”有学者斥责上海当局乱改原文，强加北方方言的普通话，如同“文化霸权，抹煞多元。” 据微博上的课本图片，出现“外婆”“姥姥”争议的是上海小学二年级下学期的语文课本，第二十四课课文《打碗碗花》。原文是作者反思迷信的外婆，告诉自己摘下“打碗碗花”会“打破碗”，进而联想到文艺作品被诬陷。不过在出版过程中，课本的主角“外婆”全部被改成了“姥姥”。 网民：“姥姥”才是方言 至于为甚么使用北方方言中常见的“姥姥”，去年二月，有上海市民就子女寒假作业中出现“姥姥”而不是常用的外婆，提出了网上质询，上海教委教研室回应称：根据《现代汉语词典》第六…	2018-06-22	星岛日报	中国		856
【普通话大世界】佛系不争固然好 莫为懒惰找藉口	http://paper.wenweipo.com/2018/06/19/ED1806190009.htm	这几天在社交网络上看到一位同学上线，于是就聊了一会，我问他上学期的考试成绩如何，他说不太好。我建议他去问问任教那门课的老师，以了解自己有何不足，加以改善，希望可以迎头赶上。他回答说︰“不去了，我很佛系。” 佛系？初听还以为是说他是佛教徒，或者至少也是佛教中学毕业的学生，然而转念一想，就算相信佛教，也和去问老师不抵触嘛。嗯，“佛系”，估计又是年轻学生爱用的网络新词吧。 上网一查，哇，网页上“佛系”二字简直是铺天盖地，甚至连纸媒上都很常见，可谓是网络、媒体的热词了，《佛系生活：你的理想是不是饿了》、《年轻人，真的佛系了吗？》这样的文章好多呢。 佛系到底指什么，其实这个网络流行语是指一种不争不抢、放下释然的生活态度。据日本的朋友说，这个词最早是日本媒体形容当代日本年轻人生活状态时用的。 恋爱太麻烦 宁愿一个人 日本杂志介绍日本的一些年轻人外表虽正常，但内心永远把自己的喜好放在第一位，做事情只按…	2018-06-19	文汇报	新闻透视眼		1089
大围操普通话女子企图抱走幼稚园生？ 警调查后称“误会” 女子解释：喜欢小朋友 18:28	http://news.mingpao.com/ins/instantnews/web_tc/article/20180615/s00001/1529053765668	大围美林邨道光幼稚园一名学生，在学校附近公园被可疑女子抱起，家长及时发现喝止并报警备案。但协助家长的区议员事后向记者表示，是一场误会。 美林邨道光幼稚园校长发出通告，指校方周四（14日）中午放学时段，发现一名操流利普通话的可疑女子，在美枫楼对开公园，企图抱走一名正在玩耍的学生，幸好被家长及时发现并喝令对方，女子放下小童后即离开。校方指，学生家长已报警备案，提醒其他家长留心看管自己子女，免生意外。 道光幼稚园回覆《明报》记者查询，证实通告由校方发出，指家长在事发后向学校报告，之后向议员办事处求助及报警。大围区议员董健莉接受《明报》记者查询，表示昨日与学校讨论后，协助家长报案。警方到场调查期间，涉嫌抱起学生的女子经过办事处门口，并接受警员问话。董指，涉事女子是本区居民，声称很喜欢小朋友，才会抱起该学生。董指，警员调查后相信事件属于误会一场，劝喻该女子不要再乱抱别人小朋友，亦劝喻家长要注意自己…	2018-06-15	明报	即时港闻		557
操普通话女子 高院庭内拍照被捕	http://orientaldaily.on.cc/cnt/news/20180615/00176_054.html	【本报讯】高等法院又发生庭上拍照事件，一名操普通话的女子被带走。高院第廿七庭昨晨处理一宗贩毒案时，一名中年女子疑在法官仍未进庭时，在公众席上举起手机向法官席方向拍照，之后向法庭书记自爆在庭内拍照。警方接获报案后到场后，五十岁姓黎女子涉违反《简易程序治罪条例》被捕，经初步调查后已获释。警方会继续进行深入调查，如有足够证据会向她发出传票，案件交由中区警区刑事调查队跟进。 唐琳玲庭上拍照囚七天 司法机构发言人指出，不评论个别个案，一般而言，如法庭范围内怀疑有人拍照，司法机构会了解作出适当跟进，包括有需要时转交警方处理。自奇女子唐琳玲在庭上拍照于本月初被裁定刑事藐视法庭罪成被判监七天后，法庭采取新措施，每逢开庭前均会播放一段声带，以广东话、英语及普通话三语提醒公众席人士不得在庭上拍照，否则可能干犯刑事藐视法庭罪。 据处理该宗贩毒案的辩方律师透露，其暑期学生目击一名坐于近法官席位置、蓄短发穿波点裙…	2018-06-15	东方日报	港闻		580
【拐子疑云】普通话妇抱起幼稚园女童 家长吓惊求助报警 (19:55)	http://m.on.cc/nc/hknews/20180615/20180615195546lc.html	【on.cc东网专讯】大围发生拐子婆疑云。昨（14日）午3时许，一名母亲到美林邨道光幼稚园接其就读幼儿班(K1)的女儿放学，到美桃楼及美枫楼之间的游乐场玩耍，期间，一名操流利普通话的可疑女子走近，并抱起女童，幸好女童的母亲及时发现，并大声喝止对方，该可疑女子闻声放下女童并离开。 沙田区区议员董健莉称，该名母亲惊魂未定，带着女儿到美枫楼地下的议员办事处，向职员讲述事件及求助，又通知幼稚园，校方为安全起见报警。警员到场调查时，该名可疑女子再度现身，即时被警员截停查问。 据了解，被截查的女子49岁，为美林邨居民，有人承认因为见到女童太可爱，禁不住抱起她。警方经调查后，认为该女子无意图拐走女童，相信是误会一场，而女童母亲亦不作追究。 警员一方面劝喻女童的母亲要好好看管女儿，另一方面则告诫该名女子，勿再未经他人同意抱起别人的，她其后亦向女童的母亲道歉，然后获准离去。而美林邨道光幼稚园的校长于昨日发…	2018-06-15	东方日报	即时港闻		483
【普通话教与学】见“啊”不读“啊” 音变字不变	http://paper.wenweipo.com/2018/06/12/ED1806120009.htm	前一阵子，我在给同学上会话课，那天的话题是说天气，我让大家先形容一下当天的天气情况。有一个普通话说得不错的同学就说：“今天的天气真好呀！”然后我找第二个、第三个同学再把这句话说一遍，但是是快速地说，说完大家就发现，另外两个同学说的是：“今天的天气真好哇！”咦，怎么会这样呢？一个说“好呀”，一个说“好哇”，到底哪一个正确呢？答案是“好哇”。 在普通话中，有一种现象叫做语流音变，语流音变有四种情况，“啊”是其中的一种情况。 我在教同学学习“啊”的音变时，一般都告诉他们把其分成两大类，一类是发音变，汉字的写法也可以变。 比如：“你快说啊”这一句，因为“说”的汉语拼音最后一个字母是“o”，所以这句应该读“你快说呀”，汉字可以写作“啊”或“呀”；又如“你快看啊”，“看”字拼音最后的字母是“n”，所以这句读“你快看哪”，汉字也可以写“啊”或“哪”；再如上面那句“今天天气真好啊！”，“好”字拼音最后的…	2018-06-12	文汇报	新闻透视眼		1019
美朝峰会后 安倍将与特朗普通话 16:09	http://192.168.0.5/hkejjs/2018-06-11/1863683.html	美朝首脑峰会将于明日举行，日本外相河野太郎表示，在峰会之后，首相安倍晋三将与美国总统特朗普通话。 河野在国会会议上指出，他将前往首尔，与南韩外长康京和及美国国务卿蓬佩奥，讨论是次峰会。 另外，日本内阁官房长官菅义伟称，日本将提供协助，让特朗普与北韩领导人金正恩的会晤，成为历史性的会晤。	2018-06-11	信报	即时时事脉搏		167
师承古天乐？陈家乐游台湾骚神级普通话 (22:30)	http://m.on.cc/nc/ent/20180610/20180610223049en.html	【on.cc东网专讯】近排人气急升嘅艺人陈家乐近日重游台湾，佢话八年前某日同朋友喺台湾食消夜，发现只有大型连锁快餐店，当时普通话唔系咁好嘅佢入去叫嘢食，但店员听唔明佢讲乜，最后要靠指手画脚先搞掂。 今次家乐嚟到台湾，即刻嚟个报仇之旅，佢要一个人帮晒全部朋友叫嘢食，打算为自己一雪前耻！家乐一入店里面就自信爆棚咁话：“一个麦乐鸡可以有两个酱吗？”店员听之后头都大埋，仲搵救兵畀家乐睇餐牌，原来台湾人将麦乐鸡叫做麦克鸡，难怪店员听唔明！解决完呢个问题后，家乐又再发挥神级普通话，话要烧烤同甜酸酱，点知店员竟然话：“台湾只有糖醋酱。”阴公，撞板两次呀… 趁店员落单之际，家乐问对方觉得佢啲普通话点？对方竟然答可以！沾沾自喜嘅家乐再叫对方估吓佢系边度人，点知对方谂都唔使谂就答：“香港人！”陈家乐为咗挽回香港人嘅面子，夹硬话自己系上海人，点知店员竟然话：“不相信，上海人的普通话怎么会是这样！”虽然家乐被人…	2018-06-10	东方日报	即时娱乐		669
【普通话大世界】傻白甜可爱无害 傻白瞎随时致命	http://paper.wenweipo.com/2018/06/05/ED1806050021.htm	前些日子在观课时，看到一对男女同学在用普通话斗嘴，我正担心火药味太浓，任教老师正准备去“救火”时，那名男同学突然爆出了一句︰“老师别担心，她就是一个『傻白甜』，是不会生气的。”顿时，火药味消失了，班上的同学都笑了起来，我再看一下那女同学，果然脸上没有生气的表情，正在座位上傻笑。 可能大家听过“高富帅”（高大、富有的帅哥），也听过“白富美”（皮肤白皙、富有的美女），那么“傻白甜”又是什么意思呢？该不会是傻子和白痴结合起来的甜美女孩吧？ 纯良无机心 带点天然呆 非也，“傻白甜”是最近于内地流行的新词汇，指的是“个性有点傻气、皮肤白皙、长相甜美”的人，甚至内地的网民整理出一套公式，“傻白甜=天然呆+白穷美+甜蜜无虐”（无虐︰不会出现虐待主角的剧情）。我们一般会称一些在爱情电视剧里，扮演个性纯良没有机心，长相很萌、很可爱，有时还会带点天然呆，让观众看时觉得感觉很温馨的女主角为“傻白甜”。内地偶像…	2018-06-05	文汇报	南北直通车		894
EXO港骚冧招尽出迷魂Fans世勋狂晒普通话	http://stepaper.stheadline.com/news_content.asp?newsid=D02098.txt&newscat=D&newsdate=2018-06-04	韩国人气男团EXO前日再度来港，举行一连两日的香港演唱会。8子劲歌热舞足足两个半小时，大唱多首大热作品。而EXO成员各自大晒普通话，其中以世勋讲得最多。他们又大跳性感舞步又卖萌，令全场女fans相当满足。文：阮瑜图：谭志光 前晚韩国人气男团EXO在亚洲博览馆举行一连两日香港演唱会的头场演出，全场爆满。演唱会于约7时准时开始，先播出成员型仔片段，fans未见真人已经不停尖叫，然后8名成员身穿型格舞衣出场，全场fans拿着EXO手提灯打气，令全场一片白光。第一部分EXO以一曲《The Eve》打头阵，大晒劲舞，其后唱出《Forever》等，成员灿烈大叫：“Hong Kong”炒热气氛，8子又走到前面舞台，Xiumin以英文说：“Hey you, Hong Kong, are you ready? ”之后他与伯贤作双人表演，在高台大跳劲舞，冧爆fans。 送飞吻派心心 EXO众人换过西装之后再…	2018-06-04	星岛日报	娱乐		1087
预告出新碟再会港迷 EXO普通话沟通大晒舞功	http://www.singpao.com.hk/index.php?fi=news4&id=72103	韩国人气男团EXO八子前晚在港开骚，不但与粉丝与普通话沟通，全晚劲歌热舞大晒舞功，又不时派心心及飞吻，冧得粉丝开心不已。EXO更预告出新碟，又承诺再袭港开骚。 EXO前晚在亚博举行巡演香港首场演唱会，吸引大批粉丝到场，八子一连唱出多首歌曲包括《Touch It》、《Sweet Lies》、《Call Me Baby》、《Lotto》和《Sing For You》等，又多次行到台前近距离与粉丝接触，并不时以普通话讲“谢谢”，全晚更劲歌热舞，令粉丝冧爆。 化身白马王子 EXO不时派心心及飞吻，各自准备Solo舞台，Kai大晒芭蕾舞功架、灿烈唱Rap、Suho瞓身劲舞、D.O.在灿烈钢琴伴奏下献唱英文版《For Life》，灿烈Rap时有一句“疲惫时紧紧抓住那八双手”的歌词，意指EXO成员九位一体，粉丝立即尖叫。 八子先以普通话向粉丝打招呼：“大家好，我们是EXO。”相隔年几再来港开骚，八子又…	2018-06-04	成报	娱乐		809
同内地粉丝直播玩游戏 巴喇莎认普通话唔掂 (04:00)	http://m.on.cc/nc/ent/20180604/20180604040004en.html	【on.cc东网专讯】艺人巴喇莎、仙乐都（吴尧尧）、艾美琦（Amy）及“警讯之花”马溱禧日前出席水晶巴士活动，在香港巡游一圈之余，更玩直播与内地及印度的朋友玩游戏，最搞笑是玩“超级无敌估歌仔”，巴喇莎说：“我哋唱印度歌畀印度嘅朋友估，印度嗰边就唱广东歌畀我哋估，好搞笑！最后赢到嘅礼物系去脂饮品，啱晒我，之前我去旅行肥咗好多，要为夏天尽快收身喇！” 讲到活动上的得意事，巴喇莎表示与语言有关，擅长英文的她负责跟印度公司人员沟通，但以普通话与内地Fans交谈时却考起了她，巴喇莎说：“我普通话唔掂，但都唔怕肉酸逼自己讲多啲，希望内地朋友包涵，都希望之后有多啲登台机会。”	2018-06-04	东方日报	即时娱乐		297
教普通话弹起	http://orientaldaily.on.cc/cnt/entertainment/20180603/00282_002.html	现年44岁的利嘉儿（Lily）1999年入行，凭主持节目《笑谈普通话》人气急升，并挟人气拍摄不少广告。直至2005年，她与拍拖一年半的DJ周国丰于山顶太平山餐厅举行婚宴，但未有正式入纸注册。由于二人在圈中人缘甚好，当年不少巨星包括陈慧琳、张栢芝、郭富城、古巨基、郑伊健、容祖儿和Twins等都到场祝贺。可惜二人关系只维持了短短3年就分开，直至2010年，Lily嫁给有米老公Bong，专心做阔太。 近年她全面复出，为电台开咪做DJ，更转型做“KOL”在网上分享扮靓心得及写时装专栏，吸纳不少支持者。	2018-06-03	东方日报	要闻		262
要求普通话对话 官拒绝	http://premium.mingpao.com/cfm/Content_News.cfm?Channel=gb&Path=202209622026/gbb2.cfm	【明报专讯】唐琳玲上周三与陈官“唇枪舌剑”时，坚持用英语与陈官沟通，至日前才改用母语普通话发言。陈官每次均安排法庭翻译员，将唐的普通话发言翻译至英文，并将陈官的问题或指示翻译成普通话。惟唐昨质疑为何需要翻译员，更主动问陈官“你是明白普通话吗”，要求陈官以普通话与她对话。 陈官昨读出案情后，询问唐是否明白。唐表示她明白中英文版本，但不明白为何要翻译员传译，又问陈官“你是明白普通话吗”，要求“直接用普通话与你（陈官）对话”。 陈官闻言说自己的普通话程度非常有限，只完成初级普通话课程，故相信未能以普通话与唐沟通，但唐可继续使用普通话，相信若唐缓慢地说话，他能明白大部分内容。 在整个审讯中，陈官亦继续要求翻译员传译，并因应证人以广东话作供，庭上有两名翻译员作三语翻译。	2018-06-01	明报	港闻		369
【庭内拍照】唐琳玲问官可否用普通话官:慢慢说可听到仍会以英文对话 13:24	http://std.stheadline.com/instant/articles/detail/729304-%E9%A6%99%E6%B8%AF-%E3%80%90%E5%BA%AD%E5%85%A7%E6%8B%8D%E7%85%A7%E3%80%91%E5%94%90%E7%90%B3%E7%8E%B2%E5%95%8F%E5%AE%98%E5%8F%AF%E5%90%A6%E7%94%A8%E6%99%AE%E9%80%9A%E8%A9%B1+%E5%AE%98%3A%E6%85%A2%E6	占旺藐视法庭案件早前于高院开审，35岁内地女子唐琳玲被指审讯期间在庭内拍摄，惟律政司一方日前指她未有于72小时内缴交5万元保释金，而警方上门寻人时却发现住址不存在，法庭遂发岀通缉令后将她拘捕，唐今由囚车押解到高院，案件将于下午2时半进行审讯。 法官陈庆伟今早在庭上读岀案情陈述书后，唐表示听懂中英文的指控，无须翻译，但就询问可否与法官直接以普通话对话，陈官闻言即称“My Putonghua skill is very limited (我的普通话技巧非常有限)”，并指他只完成基本的普通话课程，若她慢慢说，他可以听到99%，但仍会以英文与她对话。 唐承认有做过陈述书上所指的行为，但她直言“我不认为那些行为干犯了刑事藐视法庭”，唐续解释她并非犯罪，只是被指控，她亦不清楚是否确实有人目睹其拍摄行为及使用WeChat。陈官一度提岀押后案件至下午处理，但唐称希望法官给予她一点时间考虑，认为不需要更多…	2018-05-31	星岛日报	即时香港		452
【庭内拍照】唐琳玲问官可否用普通话 官:慢慢说可听到仍会以英文对话	http://www.stheadline.com/inews-content.php?cat=a&nid=123049	占旺藐视法庭案件早前于高院开审，35岁内地女子唐琳玲被指审讯期间在庭内拍摄，惟律政司一方日前指她未有于72小时内缴交5万元保释金，而警方上门寻人时却发现住址不存在，法庭遂发岀通缉令后将她拘捕，唐今由囚车押解到高院，案件将于下午2时半进行审讯。 法官陈庆伟今早在庭上读岀案情陈述书后，唐表示听懂中英文的指控，无须翻译，但就询问可否与法官直接以普通话对话，陈官闻言即称“My Putonghua skill is very limited (我的普通话技巧非常有限)”，并指他只完成基本的普通话课程，若她慢慢说，他可以听到99%，但仍会以英文与她对话。 唐承认有做过陈述书上所指的行为，但她直言“我不认为那些行为干犯了刑事藐视法庭”，唐续解释她并非犯罪，只是被指控，她亦不清楚是否确实有人目睹其拍摄行为及使用WeChat。陈官一度提岀押后案件至下午处理，但唐称希望法官给予她一点时间考虑，认为不需要更多…	2018-05-31	头条日报	即时港闻		452
【占旺案庭内拍摄】唐琳玲要求法官用普通话对话 自言明中英版本 质疑为何要传译 13:24	http://news.mingpao.com/ins/instantnews/web_tc/article/20180531/s00001/1527742994972	律政司起诉17人于2014年在占旺清场期间涉违反禁制令，控方日前读出开案陈辞时，内地女子唐琳玲被指在庭内拍摄，她因未有依时交出保释金，至前日被捕。唐今正式被控一项刑事藐视法庭罪，唐承认于本月23日在法庭内拍摄最少3张相片，并上传了2张相片到微信，但她否认干犯刑事藐视法庭。 法官陈庆伟今早读出案情后，询问唐是否明白。唐表示她明白中英文版本，但不明白为何要翻译员传译。唐又询问陈官“你是明白普通话吗”，要求与陈官以普通话对话。 陈官闻言指自己的普通话程度非常有限，并只完成初级普通话课程，故相信未能以普通话与唐沟通。但唐可继续使用普通话，陈官相信若唐缓慢地说话，他能明白大部分内容。	2018-05-31	明报	即时港闻		314
普通话演讲 诵出快乐梦	http://124.243.200.100/a.php?f=20180530/hy-31.txt	从港岛数码港的弘立书院放学出来，张钧童并没有回家。她匆匆忙忙赶到九龙观塘的鸿图中心，接下来的两个多小时，她都要和等候在那里的老师一起排练。距离正式登台主持活动还有三天，虽然参加过无数的演讲比赛，但被临时告知要去做司仪，张钧童还是有些紧张─12页的稿子全部都要用普通话讲出，表情要自然且语调要活泼，对于一个才上六年级的香港小朋友来说，实在是有些难了。但登台这天，这位小司仪与她搭档的蒋妍─普通话国家级水平测试员，用努力收获了热烈的掌声。 大家不知道的是，为了能清楚地读出每个字，张钧童捧着厚厚的字典，一个一个地查找与注音。 张钧童可以顺畅地完成主持，靠的可不止是这些。今年是她学习普通话的第八年，在她还上幼稚园的时候，父母便送她学习普通话，每星期一次课雷打不动，一直坚持到今天。不仅是张钧童，她的两位小弟弟也学起了普通话，这次的演讲比赛，姐弟三人都获得了金奖。 “我也要成为老师” 两三年前，张钧童的…	2018-05-30	大公报	校园版		1294
教局写作网页 普通话拼音做档名话正常做法？唔使过分猜测	http://premium.mingpao.com/cfm/Content_News.cfm?Channel=gb&Path=202208860506/gzb1.cfm	【明报专讯】继早前网民发现，教育局网上资源嘅一篇文章，话粤语唔系母语惹争议后，网民继续挖掘教育局推动普通话嘅动作，近日再发现教育局一个教中文写作嘅网页，附件嘅档案名称都系普通话拼音，唔系常见嘅英文档案名。教育局就同Emily大派定心丸，话咁都系惯常做法，叫大家唔使过分猜测。 普通话科指引 档名反而用英文 网站栏目叫“中小学中文实用写作参考资料”，讲解唔同实用文体嘅应用。上面有15份附件，但Emily发现，除咗“前言”同“鸣谢”档案分别用“preface”同“acknowledge”嚟做档案名之外，其余13份都用普通话拼音命名，将“便条”命名为“biantiao”、“书信”作“shuxin”等。Emily喺局方上载课程文件嘅另一页面，下载小一至中三嘅《普通话科课程指引》，档案名反而用英文“PTH Curriculum guide”表达。 教育局就同Emily讲，数字同字母拼合，同埋用拼音做…	2018-05-25	明报	港闻		523
【占旺案庭内拍摄】唐琳玲获准保释后首用普通话回应：相信法官决定 18:13	http://news.mingpao.com/ins/instantnews/web_tc/article/20180525/s00001/1527243154390	被指在占旺藐视法庭案法庭内拍摄的持香港身分证内地女子唐琳玲，法官周五（25日）称已将事件交警方跟进，待警方完成调查后，律政司会再考虑如何处理。案件押后至6月15日再讯，唐获准保释。 唐琳玲离开法庭时，遭大批记者包围。唐首次改以普通话回应事件，她表示“今天法庭的所有行为，都体现了法庭是严明公正的”，她相信法官、相信司法人员的决定，并一再重申“这是一个公开的案件，所有的事都是公开透明的。 她亦要求传媒不要再打扰其生活，要公正报道，不要误导公众。本报记者向她展示一名Aileen Tang的linkedin时，唐没有回应，问及她是否中铁建员工，她亦没有任何反应。	2018-05-25	明报	即时港闻		304
操普通话女庭内拍摄拒向官解释：这是小事	http://stepaper.stheadline.com/news_content.asp?newsid=A06012.txt&newscat=A1&newsdate=2018-05-24	占旺藐视法庭案件昨早于高院开审，一名持香港身分证、操普通话的女子被指于审讯期间在庭内拍摄，又拒绝向法官解释，形容这是一件小事，还称乐意与法官拍照，并以英语重申“今天是公开聆讯日”，惟法官指在他法庭内是一件大事，强调近日已多次有人在庭内拍照。拍照案件将押后至本周五再讯，以待律政司咨询法律意见及考虑进一步行动，期间女子被充公手机及不准离港。 唐姓女子于庭上坚持用有口音的英语与法官陈庆伟对话，不时惹庭内人士窃笑。自称为法律人员的唐于庭上指自己会行使缄默权。陈官多番问唐有否拍照，唐仅说“today is public hearing day”。 没收手机禁离港 陈官一度打算将唐还柙，并要求她交出手机，她反要求陈官叫书记自行捡取手机。法庭书记取得相关文件后，陈官发现她持有香港身分证，她表示并非永久居民，强调“I am Chinese”。唐又称法庭充公了她手机，令她无法找律师，并即场要求庭内律师可否…	2018-05-24	星岛日报	港闻		991
四亿人讲方言 不会说普通话	http://www1.hkej.com/dailynews/article/id/1849724/	重读政治讽刺小说1984，感受到小说中的“老大哥”，在香港社会现实中也是无所不在。 英国记者、作家乔治．奥威尔（George Orwell, 1903年至1950年）笔下的“老大哥”，严密监控民众，指指点点，习惯于“我说你听”的训政，衍生一个又一个的“荒谬”，人们备受折腾。 老大哥荒谬 困扰香港人 近期，西方热起来的术语“奥威尔式胡言乱语”（Orwellian nonsense），就涉及“老大哥”的谎言和“荒谬”。 港人无意与官府过不去，但官府近期一个又一个“老大哥”式的“荒谬”，令港人困惑。 邓小平在1982年宣布，确定“一国两制”的“十六字方针”：“收回主权，保持繁荣，制度不变，港人治港”（《中华人民共和国国史百科全书》，页393），官府却训令历史课本不宜说“收回香港主权”。 就社会人际沟通工具（载体）而言，母语（mother tongue）是指幼童牙牙学语习得的第一种语言，这是汉语…	2018-05-24	信报	时事评论	丁望	2383
Kelly Online：港爸护女！怒斥普通话妇 港铁“半个空位”照摄坐落去	http://www.stheadline.com/inews-content.php?cat=a&nid=117745	港铁争座位加上“中港矛盾”，再次引起网上争议。最近有本港网民发文大呻，乘东铁回大埔途中，坐在座位上的女儿，经已累得睡在太太大腿，此时小朋友“侧身瞓”留了半个空位，但后来竟然有普通话妇人上车，连那“半个空位”都不放过，立即坐下，令他十分气愤。发文立即引起大批家长，讲述同类经验。 Will Chen在社交媒体群组“Tai Po 大埔”发文，表示“心里有气”很想发泄。他指出一家四口，在红磡上车，搭东铁回大埔，大女儿因玩累了，未到九龙塘就已经睡在太太大腿上，当到九龙塘站，有个操普通话的女人，“问也不问就坐下那半个空位，我一见到就庆庆地，本来想开口理论，但2个小朋友都睡了，我不打算吵醒她们，唯有把火降下”。港爸坦言，如果她有需要，开口问一问，让她坐下也没所谓，但问也不问就坐十分过份。 网民纷纷留下同类经历，Bitty Betty Chan指“我细个去大陆坐巴士系单边一人位，有个女人都可以摺埋嚟坐我…	2018-05-24	头条日报	即时港闻		610
2018教师语文能力评核 普通话达标比率优于去年 惟英文反之 21:29	http://news.mingpao.com/ins/instantnews/web_tc/article/20180524/s00001/1527168230057	政府周四（24日）公布2018年度教师语文能力评核成绩。普通话方面，应考人数为2118人，较去年增加164人。至于本年成绩达语文能力要求（三级或以上）考生人数，百分比较去年上升，惟英文反之。 普通话评核有4个部分，包括“聆听与辨认”、“拼音”、“口语”，和只供教师报考的“课堂语言运用”。本年度达标考生百分比，分别是78.1%、68.9%、83.3%和87.7%，较去年59.8%、55.2%、76.8%和87.4%，有轻微至显著上升。 英文评核则有5个部分，包括“阅读”、“写作”、“聆听”、“聆听”，和同样只供教师报考的“课堂语言运用”。本年度达标考生百分比分别是84.1%、43.0%、76.4%、57.6%和95.6%，与去年的85.1%、39.2%、82.6%、56.3%和97.3%，达标百分比普遍下降。 考评局与教育局2001年起合办教师语文能力评核，评核考生是否具备任教英国语文和普…	2018-05-24	明报	即时港闻		479
操普通话女疑庭内拍摄 拒交手机 指“I am Chinese” 13:21	http://news.mingpao.com/ins/instantnews/web_tc/article/20180523/s00001/1527051403107	律政司于2015年获高院批出许可，起诉“四眼哥哥”郑锦满等17人刑事藐视法庭，指他们于2014年在占旺清场期间涉违反禁制令。控方今就5名不认责的答辩人读出开案陈辞。惟期间一名持有香港身分证、操普通话的非永久居民被指在庭内拍摄。法官陈庆伟要她作出解释，但她拒绝并称要聘请律师，又指是一件小事。陈官斥在法庭内有人拍摄是一件严重的事，要求她于下午4时30分再到庭解释。 控方今早读出开案陈辞期间，陈官突表示接到投诉，一名唐姓女士被指在庭内拍摄。陈官即时要求该女士解释，惟唐女没有回应陈官的指控，只表示案件是开放予公众听审，她亦是今早取公众筹到庭。陈官再就拍摄指控追问她，她表示没有法律代表下，她不会作出回应。 陈官起初要求执达主任将女士还押，并要求女士交出手机，但女士拒绝，反要求陈官叫书记自行检取其手机。陈官再要求检查女士身分证明文件后，再遭女士拒绝，书记取得身分证明文件后，陈官发现女士持有香港身分证…	2018-05-23	明报	即时港闻		767
【占旺藐视案】法官追问庭内拍摄指控 操普通话女：摄陪审团与我无关 乐意与法官拍照 16:29	http://news.mingpao.com/ins/instantnews/web_tc/article/20180523/s00001/1527063629672	律政司于2015年获高院批出许可，起诉“四眼哥哥”郑锦满等17人刑事藐视法庭，指他们于2014年在占旺清场期间涉违反禁制令。控方今就5名不认责的答辩人读出开案陈辞，惟其间一名持有香港身分证、操普通话的非永久居民，被指在庭内拍摄。她坚持用充满口音的英语与法官陈庆伟对话，不时引起庭内众人窃笑。 法官陈庆伟多番追问唐姓女子有关在庭上拍照的指控，女子没有回答，只表示“今日这宗审讯是公开予公众旁听，我取的是公众筹一号，公开聆讯的定义是什么？”，又指没有律师代表下，她会行使缄默权。 其间，法庭翻译欲向唐女士澄清她是否说普通话，陈官要求翻译“speak up”（大声说话），翻译未及回应，唐女士便指著翻译表示法官“ask you to stand up”（叫你站起来），惹来庭内众人窃笑。 陈官后来批准唐女士离开以聘请法律代表，唐女士即问庭上的大律师们是否乐意协助她，因为这是一件“too small is…	2018-05-23	明报	即时港闻		734
【普通话豁免试风波】受罚浸大生校园张贴简体字悔过书：符合国情呀嘛 17:52	http://news.mingpao.com/ins/instantnews/web_tc/article/20180521/s00001/1526895361861	本年1月，香港浸会大学有学生，不满普通话豁免试评分机制欠透明，到语文中心抗议时夹杂粗言，事后其中4名学生遭纪律处分，包括要写道歉信。其中一名受罚学生廖伟濂，在浸大民主墙贴上以简体字撰文的悔过书，称向全党、全国、各族人民及语文中心“领导干部”表达悔意，认为自己对“以钱大康校长为核心的校委会”欠尊重，并称会以国家主席习近平新时代中国特色社会主义思想，改造自己的世界和语言观。 悔过书题为《向党、国家、人民和语文中心投降－我的一封悔过书》，称向浸大语文中心“各级领导干部”职工致歉。文中提及，自己当日因不满校方评分机制及准则有黑箱作业之嫌等问题，到中心寻求答覆，称随后遭校方相关纪律检察部门检举“寻衅滋事”，经一审宣判上诉无效后定罪，故透过悔过书对自己的罪行作深切反省及忏悔，以沉重而谦卑心情，撰写悔过书予中心“各级干部”职工，恳求原谅。 曾为学民思潮成员的廖伟濂在内文亦提及，过去近8年，受反高铁运动…	2018-05-21	明报	即时港闻		1100
文在寅今访美前 与特朗普通话20分钟	http://paper.wenweipo.com/2018/05/21/GJ1805210009.htm	韩国总统文在寅今日会启程访问美国，明日与美国总统特朗普举行会谈，两人昨日通电话20分钟，就朝鲜最近的连番表态深入交换意见，同意保持密切磋商，继续推动下月12日的美朝峰会成功举行。 由于朝鲜近期猛烈抨击美方提出的半岛无核化方案，文在寅和特朗普料将在峰会深入讨论美韩如何共同实现朝鲜无核化，在美国方案和平壤“阶段性、同步无核化”方案之间寻求平衡，收窄分歧。 文在寅明日上午将会晤华府负责外交和安全事务的主要官员，中午与特朗普单独会面，之后出席由两国官员参与的会谈并共晋午餐。文在寅亦会到访修复后的“大韩帝国驻美公使馆”，出席《朝美修好通商条约》签署136周年和公使馆成立130周年纪念仪式，周四返抵韩国。韩方考虑在文在寅结束访美后，与朝鲜领导人金正恩透过热线通话，讨论访美成果。韩联社/路透社/法新社/路透社	2018-05-21	文汇报	国际		376
【普通话豁免试风波】浸大拒陈乐行刘子颀上诉申请 13:41	http://news.mingpao.com/ins/instantnews/web_tc/article/20180518/s00001/1526620405315	浸会大学学生会前会长刘子颀及中医学系学生陈乐行今年1月，因不满校方普通话豁免试机制而到语文中心抗议，其间刘曾说粗言，两人其后分别被罚停学一个学期及8日。两人上月提出上诉。FB专页“港语学”今早贴文指出，两人昨日收到学生事务委员会书面通知，称“原审已参照控罪及呈堂证据公平进行”，拒绝两人的上诉申请，并限两人在10个工作天内，即6月1日之前致函语文中心道歉。	2018-05-18	明报	即时港闻		180
方言与普通话	http://124.243.200.100/a.php?f=20180516/xk-4.txt	粤方言富有生命力，特别是香港方言，是广州方言区的重要部分，其词句发展丰富了汉语大家庭。香港话中的某些词句，是汉语过去没有或少用的，近年北上影响了内地语言，约定俗成地成了汉语的常用词句，此处可举“唱衰”、“埋单”、“炒鱿鱼”、“有没有搞错啊”为例。 权威语言意见从未否定过方言存在的现实与价值，也未比较过孰高孰低。 方言的产生与该区人文地理、风土人情密不可分。虽是广东省，所操语言随地区简称为“粤语”，但事实上语种五花八门：潮州话、佛山话、广州话、梅州话、五邑话……一个人如要到别的地区做事谋生，就必须要使用一种大多数人都通晓的语言，这样才不至误事。汉民族使用的共同语“普通话”，就是建基于这种现实。否则一个十三亿多人口的国家，总是鸡同鸭讲，可以断言那是个不堪的局面。 香港的普通话教育，近年由于政治敏感被污名化。有的学校开始考虑走老路，把教育当局规定为“核心”课程的“普通话”时数削减，有的大学也改…	2018-05-16	大公报	小公园	凡心	774
墨尔文国际校拟8月开学 必修中文 普通话简体字教授	http://premium.mingpao.com/cfm/Content_News.cfm?Channel=gb&Path=134805846884/gfa1.cfm	【明报专讯】逾150年历史的英国墨尔文学校（Malvern College）在港首间中小学“海外学校”料于8月开课，每年学费16万至18.2万元，本地生比例将占整体一成。学校将中文设为必修科，以普通话和简体字教授。校长解释，世界社群也用简体字，学习简体字对学生很有用。 学费16万起 采1B课程 香港墨尔文幼稚园去年已开学，小学和中学则料于8月开课，采用“国际文凭课程”（IB），首年先开办第1至9年级，料收生400名，预计4年后开办10至13年级，最终中小学共提供约1000个学额，本地学生比例约占一成，小学和中学每年学费分别为16万和18.2万。香港墨尔文幼稚园学生毕业后可获优先考虑入学，但仍须通过面试。 7至9年级可升英母校 该校将中文设为必修科，并以简体字和普通话授课。香港墨尔文国际学校创校校长李诺斌解释，简体字对学生很有用，“欧洲亦正发展简体中文教育，世界社群（world commu…	2018-05-16	明报	教育		899
【普通话大世界】古汉语今常见 书面口语通用	http://paper.wenweipo.com/2018/05/16/ED1805160007.htm	古汉语和现代汉语并非完全割裂的，也不是孤立地、对抗性地存在于语言当中。现代汉语词汇中传承、保留了很多古汉语词汇。和内地流通的通用中文相比，香港的书面中文（港式中文）中的文言词语比较多，而且由于古汉语词和现代汉语词常常连用、疊加，所以造成了语言中很多特殊的层疊现象。 我们常常在报端看到的“饥馑三十”、“薪俸税”等词语，算是很好的例子。 “饥”、“馑”本意均为灾荒、粮食歉收，《谷梁传》中说：“二谷不升谓之饥，三谷不升谓之馑。”因两字意思相近，故成为双音节词，在文言文中常连用，而现代汉语通用中文中则非常少见。但港式中文中“饥馑”常与其他词语一起使用，构成专有名词如“饥馑三十”等。 薪水本指打柴汲水 “薪俸”一词则是“薪水”、“俸禄”的合成缩略形式。“薪水”最初指打柴汲水，据《南史．陶潜传》记载：陶潜送给他儿子一个仆人，并写信说：“你每日生活开支费用，自己难以供给自己，现派一个仆人来帮助你打柴汲…	2018-05-16	文汇报	新闻透视眼		1389
罗秉祥再吁撤普通话毕业要求	http://www1.hkej.com/dailynews/article/id/1843219/	浸大学生年初因不满学校的普通话豁免试评分机制到语文中心抗议，两名学生一度被停学。浸大文学院副院长罗秉祥昨在社交媒体撰文，再次呼吁校方取消普通话毕业要求。他认为，把普通话说得更好是为沟通上的方便，反问这是否应该提升为一个毕业要求。	2018-05-15	信报	政坛脉搏		116
浸大文学院副院长再吁取消普通话毕业要求 “日后有很多渠道还可以学好” 21:06	http://news.mingpao.com/ins/instantnews/web_tc/article/20180514/s00001/1526302091141	浸会大学学生年初因不满学校的普通话豁免试评分机制，指欠透明及不能重考等问题，到语文中心抗议，引起广泛关注。浸大文学院副院长罗秉祥周一（14日）在facebook撰文，再次呼吁校方取消普通话毕业要求。罗指浸大以“有利就业”作为订立有关要求的主要理据，与大学理念有冲突，而且学生毕业后仍有很多渠道可学好普通话，“上大学，是要学习大学殿堂才能提供的知识”。 罗秉祥在文章开首表明，自己讲普通话已超过40年，“从不抗拒普通话”，甚至连自己两个孩子出世纸和身分证的英文名字，都使用普通话拼音，而不是广东话。他又指浸大内有“强硬派人士”，认为年初学生“冲击”语文中心，校方若让步，学生将以同一手法争取其他诉求。但罗认为该次事件后，学生“一直都坐下来与校方讨论，作理性沟通”，若大学只因学生曾使用不当手法，就否定学生的合理诉求，“反映的只是一个威权统治的心态”。 罗秉祥表示，浸大一直以“有利就业”作订立普通话毕…	2018-05-14	明报	即时港闻		1368
【附辩题】贴地辩论赛“奇趣杯”今举行 学生激辩议会应否涉政治、港式普通话代表 14:11	http://news.mingpao.com/ins/instantnews/web_tc/article/20180513/s00001/1526181750498	贴地辩论赛“奇趣杯”来到第7届，辩论题目广泛，涉及社会趣闻及政治议题等，例如“议会内外应否牵涉太多政治”，以及辩论哪位艺人是“港式普通话”的代表。“奇趣杯”今天举行初赛第三回合，有兴趣人士可到场观赛。 “奇趣杯”辩题继续紧贴社会脉搏，当中不乏广受关注的政治议题。新民党容海恩早前一句“我觉得议会内外都唔应该牵涉太多政治”成为网络热话之余，同时成为辩题，参赛者将辩论“议会内外不应牵涉太多政治”的价值观是否可取。 另外，特首林郑月娥早前被问及她的母语是甚么，林太并无回答问题，只称“我不回答这么无聊问题”，参赛者因而会辩论“你的母语是甚么？”是否无聊问题。谈及语言，艺人蔡少芬和古天乐因普通话发音不准，成为网民笑柄，“蔡少芬比古天乐更适合成为港式普通话的代表”亦成为辩题之一。 有关电影的辩题同时榜上有名，近来《复仇者联盟3：无限之战》成为大热电影，参赛者要讨论“复仇者联盟比正义联盟更适合阻止ker…	2018-05-13	明报	即时港闻		1025
【网上热话】见女儿意外毁“法国五月”展品 妇人即由普通话转讲英文 22:12	http://news.mingpao.com/ins/instantnews/web_tc/article/20180513/s00001/1526219149566	作为文化界盛事之一，“法国五月”艺术节多场展览吸引不少人参与。有网友周日（13日）前往香港大会堂一处展览时，赫见其中一项展品疑意外被女童破坏。其同行操普通话的母亲，随即转以英文应对保安，最后得以安然离开。事件由现场一位参观人士分享上网后，惹起热议。 据网友黄小姐所言，她在周日下午2时左右，在大会堂参观“尼斯派：从波普艺术到偶发艺术”展览，发现地上其中一项展品，疑意外被女童破坏。黄小姐说，同行一位操普通话的妇人，立即转用英文应对保安。保安则主要关注女童有否受伤，最后让对方一家人离开。 黄小姐又透露，女童一行人离场后，现场保安马上禁止访客拍摄。她友人举机时，亦被保安制止，甚至要求删除照片。黄强调展览原本容许以电话拍照，仅禁止使用自拍棍和闪光灯，保安是在事发后，才突然不准周边访客影相。至于作品受损部分，由围栏围封起来，未知如何修复。 事件在网上惹起热议，不少网民批评现场保安处理马虎，令女童一行…	2018-05-13	明报	即时港闻		543
周日话题﹕他妈的母语系普通话？	http://premium.mingpao.com/cfm/Content_News.cfm?Channel=ja&Path=33701456711/uza1.cfm	【明报专讯】自古以来，位于中国南方嘅前英国殖民地，呢个香江小港，畀祖国坚持收回主权后，荒诞之事宁舍骑呢过人！远嘅唔讲，就前个星期，特首林郑月娥喺立法会内，被3位议员逼问“母语是什么”时，身穿旗袍恍如蒋介石夫人宋美龄嘅Carrie Lam，竟?口?面、?口?面、?口?面地三度拒答，其间，更黑口黑面咁?出一句：“我唔答啲咁无聊嘅问题！” 此事骑呢之处，不在于问题是否无聊，而系，该问答大会乃林郑主动请缨，开创特首每月一次“送上门”同议员埋牙互动嘅“月事”。何解，谂住嚟攞彩嘅大龙凤，会变成关公大灾难？ 何谓“母语”，真系咁难答咩？ “母语”系乜？ 一词各表 难?！尤其是原本打算退休返英国长居，英文又叻叻声嘅香港高端精英人士，即如旧朝嘅邓莲如爵士，佢睬你有味啦！无风起浪！ 正因为林郑特首“政治正确”之优秀表现，无意间，令香港掀起咗一股“母语”教育狂潮，各大小权威学者、语文专家、传媒才子，甚或演艺巨…	2018-05-13	明报	星期日生活		5015
【粤语非母语？】港大李辉：普通话是港1.5语言 梁美芬：普粤是“亲兄弟” 17:24	http://news.mingpao.com/ins/instantnews/web_tc/article/20180510/s00001/1525943737755	教育局网上教学资源页面一篇称粤语只是“方言”，不符“母语”之义的学者文章，引起争议。语言学家、港大教育学院副教授李辉形容，普通话是香港“第1.5语言”；经民联立法会议员梁美芬则形容，普通话与广东话是“亲兄弟”，应相亲相爱而非排斥。 港大教育学院副教授李辉于港台节目表示，香港人“口语”是广东话，但人类语言分两种形式，一种是“书面语”，一种叫“口语”：“香港人口语无疑问是广东话，但书面用的是现代标准汉语，对应的口语是普通话。” 李辉又说，普通话不是香港第二语言，是香港“1.5语言”“不是第二，也不是第一，是介乎第一与第二之间”。 李辉之后强调，“作为外来香港人、新移民，来香港20年，我是撑广东话的，我都是撑普通话的，我觉得两个不矛盾的”。他解释，作为“国家共同语言”，普通话值得推广，而作为“交流语言”，普通话科必须存在及推广。对于广东话，他形容是香港共同语言，需要保存、推广及标准化，“有需要…	2018-05-10	明报	即时港闻		756
世纪．Language Politics：普通话是香港人的母语？	http://premium.mingpao.com/cfm/Content_Column.cfm?Channel=vx001&Path=168507258505/vx001a.cfm	【明报文章】近几天，有人在教育局网站上发现大陆学者宋欣桥的一篇文章提及：“把『粤语』称作『母语』，不是严格意义『母语』的含义。”并进一步说明汉民族共同语——汉语才是香港人的母语，而这种汉语“现在中国内地称作『普通话』”。 然后指出“普通话教育就是汉族人母语基本素质的教育”（宋欣桥）。如果配合现时香港推行母语教育的环境，则使人理解为母语教育便是普通话教育。 如何界定香港人的母语？ 不言自明的是大部分香港人的母语是粤语而非普通话。前教育统筹局长王永平也公开指出，他们当时制定母语教育政策时所理解的“母语”是粤语而非普通话。香港教育学者曾荣光引国际著名语言政策学者Tove Skutnabb-kangas对母语界定的五种标准： 1.“个人最早学习的一种语言，亦即个人首先掌握并用作持久性与人沟通的语言”； 2.“个人认同自己所属的语言，并自认是该语言的土生使用者”； 3.个人得以被一语言社群接纳成为…	2018-05-10	明报	作家专栏		2341
世纪．on education：唔用普通话教中文，唔得咩？	http://premium.mingpao.com/cfm/Content_Column.cfm?Channel=vx001&Path=134805800124/vx001a.cfm	【明报文章】编按：每逢教育政策改革前后，语文教育必成争议话题，从普教中到今天某学者对粤语的看法，都成为香港教育界内外热烈讨论的话题。今天，香港教育大学讲师从当年入行面试的一句话谈起，讨论香港语文教育这个说不完的课题。 十多年前入行当中文科老师，大抵不会多想什么是“母语”。我的理解是：中文书写就是合乎语法规范的中文，口头说的就是广东话（或者叫粤语、广州话、广府话）。至于普通话，记得初入行教书，面试时曾经有校长问我怎样看普通话教中文（普教中）？我的答覆是：“学生有需要学普通话，但我不认同用普通话来教中文、或用来做教学语言。”我没法估计当时校长怎样看我这个答案，但大抵应该不太负面，因为最终我都获得一纸聘书。然而我也在想，同样的答案用在今天的面试，结果会否不一样？ 教育局要推普教中，已不是新闻，但他们所用的手法往往就是从贬抑广东话开始。曾经有普通话教育电视节目把广东话描述成恶魔的内容，要靠普通话…	2018-05-09	明报	作家专栏		3629
普通话比赛 不止比赛普通话	http://124.243.200.100/a.php?f=20180509/hy-21.txt	学习普通话不一定局限在课堂上！位于沙田隆亨邨的乐善堂杨葛小琳中学（杨中）早前举办“第十届沙田区小学生普通话擂台赛”，透过相声、诗歌／散文朗诵、讲故事等六项比赛，让学生以轻松方式学习普通话，主办单位在选择比赛诵材上亦花了不少心思，以故事比赛为例，诵材《小草和小树的故事》，教导学生成功的时候不要骄傲，实行学普通话之余，为学生灌输正确价值观！”撰文：赵凯莹 图：学校提供 一年一度的“沙田区小学生普通话擂台赛”，早已成为区内推广普通话的其中一项重点活动，多年来深受区内小学欢迎及支持，本年度赛事共吸引了接近200名来自13间小学的学生参加，为了提升赛事的专业水平，杨中更特意邀请资深普通话老师兼校际朗诵节评委陈香花、谢丽红和叶婉菁三位老师担任评判。 诵材有趣 培养品德 比赛分为六个项目，包括普通话相声、诗歌／散文独诵、讲故事、童谣表演、演讲及查字典比赛。评判会就参赛者的音准、内容表达、语调神情等评分…	2018-05-09	大公报	校园版		1157
【普通话教与学】轻声带来音乐感	http://paper.wenweipo.com/2018/05/08/ED1805080019.htm	我给同学上第一堂课的时候，经常会问他们一个问题︰“为什么要学习普通话？”其中有一个同学回答：“普通话听起来有音乐感，很好听，所以我想学习普通话。”没错，普通话听起来确实有音乐感，因为普通话的语流音变现象，其中一种就是轻声。 轻声是说话的时候，有些字音很轻很短，比如“吃了”的“了”，“我的眼睛”的“的”和“睛”，这些都是轻声字，有时候一句话里面还出现好几个轻声字，如“他是个明白人，跟他商量事情的时候，特爽快。”这句话中的“白、量、情、的、候、快”字，都是轻声字，大家只要读一下这句话，就应该能够感受到轻声带来的节奏感、音乐感了。 轻声是普通话的一个特有现象，普通话里面也有大量的轻声词语，根据《普通话水平测试实施纲要》里所列的“普通话水平测试用必读轻声词语表”（下称词语表），就有546个轻声词语。 如果要让同学们把这些词语都记住，对学生来说也是比较痛苦的一件事，因为毕竟粤语里面是没有轻声词语。…	2018-05-08	文汇报	南北直通车		1099
香里奈渴望学识普通话	http://stepaper.stheadline.com/news_content.asp?newsid=D02091.txt&newscat=D&newsdate=2018-05-07	日本模特儿兼演员香里奈昨日于九展举行见面会，宣传最新写真集《G香里奈》。她表示多年前亦曾推出写真集，但当时是跟数名女模特儿一同拍摄，是次的个人写真集在她生日的2月21日于日本首发，觉得分外有意义。她透露上次来港是2012年，当时出席电影节，今次能再见大家感到很开心，会多留数天才回日本。 香里奈透露连日于香港闹市进行拍摄，发觉弥敦道的霓虹招牌比以往少了很多，但仍拍摄到很多漂亮照片，更由于拍摄时间太长，抵港至今仍未尝到香港美食，庆幸昨晚已订好枱可以大吃一顿。 问到现年34岁的香丽奈可有考虑人生大事？她巧妙地回避问题，并谓：“想学习其他语言，好像今日活动，懂得说普通话有多好，往后在私人生活上，会多学其他语言。” 文：骆震宁 图：罗安强	2018-05-07	星岛日报	娱乐		359
“独”女丑化普通话 爆粗辱国害细路	http://paper.wenweipo.com/2018/05/07/WA1805070002.htm	（记者 文根茂）打着为基层学生补习 “温馨旗帜”的所谓“义教老师”搣时潘，最近在网络疯狂博出位。 她不仅在镜头前常穿低胸衫，还在视频中用广东话粗口无底线丑化普通话、反内地、宣扬“台独”、谩骂讽刺国家和特区领导人，假借教议论文之名，公然散播辱国言论，更大言不惭地标榜上述视频是“教学片”能令基层学生受惠云云。教育界人士呼吁家长要帮助学生识别网络内容，不要轻易被人利用、影响。 搣时潘原名潘书韵，曾就读中大中文系，毕业后任补习社老师，现已离职。目前主要制作所谓“YouTube教学片”，声称是用“另类方式制作”，会帮学生考好中学文凭试，更标榜作品会令基层学生受惠。可是，点击观看其频道的视频时不难发现，画面和内容之出位实在令人侧目。 砌词诬特首 总之辱中国 在其发布的视频中，搣时潘经常身穿吊带背心、酥胸半露，暴露程度令人咋舌。最近她发布的“自己母语自己教！内含普通话妆教学！”中，将广东话粗口当成普通…	2018-05-07	文汇报	政情与网议		1413
相隔6年来港香里奈人生大事想学好普通话 17:34	http://std.stheadline.com/instant/articles/detail/708697-%E5%A8%9B%E6%A8%82-%E7%9B%B8%E9%9A%946%E5%B9%B4%E4%BE%86%E6%B8%AF+%E9%A6%99%E9%87%8C%E5%A5%88%E4%BA%BA%E7%94%9F%E5%A4%A7%E4%BA%8B%E6%83%B3%E5%AD%B8%E5%A5%BD%E6%99%AE%E9%80%9A%E8%A9%B1	日本演员兼模特儿香里奈于九展举行见面会，连同日本名摄影师富取正明一同到场，宣传最新写真集之余，更分享拍摄点滴。香里奈提到多年前曾推出写真集，但当时是同数名女模特儿一同拍摄；今次的个人写真集，在她生日2月21日于日本首发，觉得分外有意义。她透露上次到港是2012年，当时出席电影节，能看再见大家感到很开心，此行会多留数天才会回日本。 香里奈提到连日于香港闹市进行拍摄，发觉弥敦道的霓虹招牌比以往少了很多，但仍拍摄到很多漂亮照片。由于拍摄时间太长，到港至今她仍未尝到香港美食，庆幸今晚已订好枱可以大吃一顿。问现年34岁的香里奈可有考虑人生大事？她巧妙回避问题，说：“想学习其他语言，好像今日活动，会讲普通话有多好。往后私人生活上，会多学其他语言。”（摄影：罗安强）	2018-05-06	星岛日报	即时娱乐		345
相隔6年来港 香里奈人生大事想学好普通话	http://www.stheadline.com/inews-content.php?cat=f&nid=103165	日本演员兼模特儿香里奈于九展举行见面会，连同日本名摄影师富取正明一同到场，宣传最新写真集之余，更分享拍摄点滴。香里奈提到多年前曾推出写真集，但当时是同数名女模特儿一同拍摄；今次的个人写真集，在她生日2月21日于日本首发，觉得分外有意义。她透露上次到港是2012年，当时出席电影节，能看再见大家感到很开心，此行会多留数天才会回日本。 香里奈提到连日于香港闹市进行拍摄，发觉弥敦道的霓虹招牌比以往少了很多，但仍拍摄到很多漂亮照片。由于拍摄时间太长，到港至今她仍未尝到香港美食，庆幸今晚已订好枱可以大吃一顿。问现年34岁的香里奈可有考虑人生大事？她巧妙回避问题，说：“想学习其他语言，好像今日活动，会讲普通话有多好。往后私人生活上，会多学其他语言。”（摄影：罗安强）	2018-05-06	头条日报	即时娱乐		345
“渣渣辉”够亲切 张家辉无意恶补普通话	http://skypost.ulifestyle.com.hk/article/2065574/	【晴报专讯】最近忙于为自导自演新片《低压槽》四出宣传的张家辉，早前接受内地传媒访问时，用普通话自我介绍为“渣渣辉”，遂被取笑拍得住古天乐，就连“阿哥”张学友都鼓励他学好普通话。 在前晚首映礼上，正忙着举行巡回演唱会的学友也抽空现身支持，昨日再前往江西演出。家辉坦言没有想过学友会出席首映礼，笑言︰“佢（学友）起势咁巡回，无乜嘢都好少同佢联络，直到呢两日同佢通电话，知道佢喺香港，咪叫佢嚟睇戏囉！” 兼任造型设计 学友表示看过这部戏的宣传片，觉得家辉进步了，找到自己的风格。家辉谦称仍有很大进步空间，同时感激投资方让他任性，他明白自己始终是演员，倘若有机会才再执导。 谈到他因为普通话发音不标准，把自己名字读成“渣渣辉”而遭网民取笑，家辉表示不介意，反而觉得很亲切，学友在旁鼓励他多练习，不过家辉解释，即使在内地拍戏讲普通话对白，都因为腔调有异而被安排配音，笑言︰“所以无意去纠正，会忠于自己。” 家…	2018-05-04	晴报	娱乐		608
获张学友 陈慧琳撑场 张家辉唔愿学好普通话	https://www.am730.com.hk/news/%E5%A8%9B%E6%A8%82/%e7%8d%b2%e5%bc%b5%e5%ad%b8%e5%8f%8b-%e9%99%b3%e6%85%a7%e7%90%b3%e6%92%90%e5%a0%b4-%e5%bc%b5%e5%ae%b6%e8%bc%9d%e5%94%94%e9%a1%98%e5%ad%b8%e5%a5%bd%e6%99%ae%e9%80%9a%e8%a9%b1-125013	张家辉、张学友、苗侨伟、张可颐、张继聪、林雪、元华及陈慧琳等，前晚出席电影《低压槽》首映礼，张学友、陈慧琳均表示，很欣赏张家辉的导演技巧；对于内地网民嘲笑张家辉的“港普”，更为他起名“渣渣辉”，张家辉指，不介意被笑但不会为此而学好普通话。 张学友刚刚结束台北演唱会，即来撑好友家辉场，张学友说：“听日就要走啦，要去江西表演，家辉嘅导演技巧，比上部电影更加纯熟，愈嚟愈好。”问到两人可有商谈合作，张家辉则笑说：“佢一直举行巡演，边有时间。”陈慧琳表示，张家辉导演的作品，太合她观影口味，并说：“我好钟意佢导演嘅风格，而且我举行演唱会时，张家辉全程嚟撑场，所以今日一定要嚟捧场。” 自言天性反叛 不介意被叫“渣渣辉” 谈到张家辉最近的外号“渣渣辉”在内地走红，他表示自己其实不介意：“因为我知道佢哋冇恶意，只系觉得好玩啫！(哪会学好一点普通话吗？)唔会，因为我系一个反叛嘅人。”	2018-05-04	am730	娱乐		441
【“渣渣辉”嚟喇！】学友劝多练习普通话 张家辉：你笑过我好多次啦！ 15:16	http://news.mingpao.com/ins/instantnews/web_tc/article/20180503/s00007/1525332482074	张家辉执导的电影《低压槽》昨晚于九展举行首映，家辉视为异父异母的“亲大佬”张学友、陈慧琳、乐易玲、苗侨伟、张继聪和张可颐等出席，星光熠熠。 家辉因为普通话水皮，将张家辉说成“渣渣辉”，惹起热话，网民更为他改了这个新朵，家辉坦言不介意：“我不介意，呢个朵好行喎！我有看过微博，知道个朵没有贬意，是出于亲切和好玩，不过我不鼓吹，但大家叫得开心，我亦都阻止不到。” 学友建议他在交谈时，多练习普通话，家辉诉苦：“你都笑过我好多次啦！”问到会不会的起心肝学好普通话？家辉说：“我在这方面无进步空间！其实好多香港艺人到内地拍戏，都会搵北京人配音，我当然乐意这样做，就算我讲得流利，他们都不会采用，因为他们有一套标准，不是对我有偏见，我会忠于自己，比较反叛。” （即时娱乐）	2018-05-03	明报	即时娱乐		372
【即时娱乐】张家辉势不学好普通话	https://www.am730.com.hk/news/%E5%A8%9B%E6%A8%82/%e3%80%90%e5%8d%b3%e6%99%82%e5%a8%9b%e6%a8%82%e3%80%91%e5%bc%b5%e5%ae%b6%e8%bc%9d%e5%8b%a2%e4%b8%8d%e5%ad%b8%e5%a5%bd%e6%99%ae%e9%80%9a%e8%a9%b1-124921	张家辉、张学友、苗侨伟、张可颐、张继聪、林雪、元华、陈慧琳等，昨晚出席电影《低压糟》首映礼。张家辉最近的外号“渣渣辉”在内地走红，他表示自己其实不介意：“因为我知道佢哋冇恶意，只系觉得好玩啫！(哪会学好一点普通话吗？)唔会，因为我系一个反叛嘅人。”	2018-05-03	am730	娱乐		126
普通话考DSE中文 7年增85％ 今年逾1400人 占整体2.8%	http://premium.mingpao.com/cfm/Content_News.cfm?Channel=gb&Path=134805753364/ghb1.cfm	【明报专讯】香港中学文凭试（DSE）中文科考核上月完成。中文科试卷三聆听及综合能力考核自首届文凭试以来，考生都可选用普通话考卷，本报翻查文凭试历年报考人数，发现7年间，以普通话报考中文科的考生人数上升近八成五，其中学校考生增幅近六成。以普通话应考者，占整体报考比例由约1.1%，逐年上升至今年约2.8%。有中学教师说，其任教学校近四分之一中六学生应考普通话试卷，当中以成长于普通话语境的学生为主。 考评局：评核标准一致 不分开汇报成绩 根据考评局资料，若考生报考中国语文科（普通话），其卷三聆听部分的考试录音将以普通话表达，而在卷四说话能力考核，考生须以普通话作小组讨论，主考员亦会以普通话给予指示；卷一阅读能力和卷二写作能力考核则不受影响。 翻查资料，2012年首届文凭试分别有765名学校考生和29名自修生以普通话报考中文科，截至今年3月，今届文凭试则分别有1211名学校考生和255名自修生，…	2018-05-02	明报	港闻		914
【网上热话】教育局派普通话课程配套资料 有篇章称粤语只是方言不是母语 18:00	http://news.mingpao.com/ins/instantnews/web_tc/article/20180501/s00001/1525166632846	“普教中”推行近10年，有教育界和政界中人力撑，也有人质疑成效，亦引伸本地粤普之争。最近有网民留意到，教育局曾向全港小学派发多份普通话课程配套资料中，有篇章强调“香港汉族人的母语是汉语”，粤语只属“地域变体”，普通话才是“正规的语言教育”。 教育局由1997年起至今，向全港小学派发共11套小学普通话课程配套资料，供教师选用。《集思广益（四辑）：普通话学与教经验分享》一书，2013年起列入名单。局方在书籍介绍中表示，当中25篇文章具参考价值，阐述本地和内地学者，对本港普通话教学的思考与探索。 其中一文题为〈浅论香港普通话教育的性质与发展〉，由中文大学普通话教育研究及发展中心荣誉专业顾问宋欣桥撰写。文首指出，普通话教学之所以有争议，是因为对“母语”、“中文”、“普通话”、“粤语”等概念缺乏准确理解：“这个问题对普通民众来说似乎不必深究，但对教育工作者，特别是从事中国语文的同仁来说则需要予以厘…	2018-05-01	明报	即时港闻		1083
学生：守规矩讲普通话无不妥	http://paper.wenweipo.com/2018/04/30/WA1804300008.htm	（记者 姬文风）有网民日前于facebook向东华三院甲寅年总理中学发公开信，质疑两名老师涉嫌对使用普通话的学生发表“歧视言论”，包括“香港读书唔该讲返广东话”及“讥讽”在课堂以外时间使用普通话的学生。信中内容引起热议，有人表示学生讲普通话并无不妥；有意见则认为学生应为日后应付公开试着想，尽早适应讲广东话；另有疑似知情者则透露当日其实是有同学先用普通话讲粗俗字眼，才会导致老师发言制止。 公开信质疑教师歧视普通话 该公开信题为“甲寅年总理中学教职员对使用普通话的歧视行为”，当中提及一名家政课老师在课堂上发表言论：“唔该，甲寅年系一间香港学校，喺香港读书，唔该讲返广东话，如果唔系唔该唔好喺度读书。” 另信中又批评一名训导主任“讥讽在课堂以外时间使用普通话的中一学生”，甚至有“针对的行为”，发文者扬言若有关“歧视言论”持续，将投诉到底。 上述信件于facebook专页“KYD Secrets”…	2018-04-30	文汇报	政情与网议		710
蓝循、圣三一堂﹕普教中 提升普通话沟通能力	http://premium.mingpao.com/cfm/Content_News.cfm?Channel=ja&Path=101103924243/oaa5.cfm	【明报专讯】有学校不认同普教中，但亦有学校赞同这方向正确。蓝田循道卫理小学（蓝循）于2000年起实施普教中，最初只在二年级试行，及至2004年扩展至全校推行。而在最近一次（2013年）教育局《校外评核报告》中，该校被评为“采用多年的普通话教授中文计划，发展成熟，根基稳扎，成效良佳”。此外，蓝循也曾两次获得香港电台及语常会颁发“最积极推广普通话学校”金奖。 校长梁丽琪表示，学生的普通话能力非常理想，到内地交流，交谈时展现出自信，由此看到教师在教学上的成效。同时，学校亦提供小一适应课程，一年级毋须学普通话拼音，主要透过日常沟通、交流，建立说普通话的信心。 广东话辅以讲解 蓝循初推行普教中时，已跟大专院校合作做课研，甚至自编教材，梁丽琪说，在累积多年经验下，教师在教学和课程设计上也相当成熟，“学校掌握到不同级别的学生，在学习上有什么需要；整体写作方面，也看到学生所用词组及句子表达得不错”。 至…	2018-04-24	明报	Happy Pa Ma		1303
【普通话大世界】跟着老师口型 纠正错误读音	http://paper.wenweipo.com/2018/04/24/ED1804240023.htm	10年前的香港，无论是政府部门、商场，还是大街、餐厅，能听到普通话的机会不多。偶尔听到一些香港人用普通话交流，还得看着对方，不时停顿几秒想想，转一转眼球，再加上自创手语，不连贯地表达沟通。听者要猜一下，思考后才能明白内容，最多只能勉强沟通。 《论语．述而》载：“子所雅言《诗》、《书》、执礼，皆雅言也。”（孔子讲话时用雅言，诵《诗》、读《书》、执行礼事时，都用雅言。）孔子当时讲学时用是我国最早的民族共同语：雅言，这大大方便了当时的社交活动，使得沟通顺畅。 如今，我们置身于网络资源十分发达的社会，不妨充分利用互联网，从中尝试找一找适合自己学习方法，让自己普通话更加进步。听普通话歌曲或新闻，看普通话综艺节目及电影、电视剧等都是接触普通话的好途径。当然，如果有条件能与老师面对面学习普通话，那是最好不过的了。不过，对于天天忙于工作的在职人士来说，则要克服不少困难才行。这样一来，最能充分利用这种条件…	2018-04-24	文汇报	南北直通车		1234
乐善堂杨葛小琳中学办区际普通话赛	http://stepaper.stheadline.com/news_content.asp?newsid=F04199.txt&newscat=F&newsdate=2018-04-20	乐善堂杨葛小琳中学早前举办第十届沙田区小学生普通话擂台赛，吸引十三所小学，约二百名小学生参加，最终由天主教圣华小学夺总冠军。 “沙田区小学生普通话擂台赛”共有六个项目，包括普通话相声比赛、诗歌/散文独诵比赛、讲故事比赛、童谣表演、演讲比赛和查字典比赛。资深普通话老师和校际朗诵节评委担任评判，就参赛者的音准、内容表达、语调神情等各方面评分。近二百名来自十三所小学的学生比并后，天主教圣华小学夺得总台主杯冠军，浸信会沙田围吕明才小学和马鞍山循道卫理小学则分别夺得总亚军和总季军。 评判表示，参加者的普通话水平极高，声情并茂再加上唯妙唯肖的神情，令比赛引人入胜。主办方乐善堂杨葛小琳中学希望通过比赛，提升区内小学生学习普通话的氛围和兴趣，以及藉此培养学生的协作、沟通及自我管理等能力。该校又特别选取有趣且富有教育意义的童谣、诗歌和著名故事作比赛诵材，增加学生对中国文化认识、提高修养和培育品德。 教育快讯	2018-04-20	星岛日报	教育		441
教神甫说普通话	http://124.243.200.100/a.php?f=20180420/xk-3.txt	耶路撒冷古城的圣墓教堂，据说是耶稣遗体葬地，吸引了游客特别是信徒前往。与我们见过的罗马圣彼得教堂、米兰大教堂等相比，它的门面显得朴素。教堂迎面是整幅墙的壁画，画着耶稣被揩擦尸身的情景，画前下方是块纹理粗糙、开裂的长形石板，据说耶稣就躺在那上面被擦洗。 信徒们一进教堂，先在石板前跪下，拿出身上的物件或擦布揩拭，大概是希望沾上耶稣的气息。他们边擦拭边喃喃祈祷，有的人还热泪盈眶，长久不愿离去。 教堂最重要的部位是堂中堂，一座建在中央位置的圣堂，去参拜或参观的人打着蛇饼排队，半天才迈一小步。 进到圣堂是一小厅，中间的圆台燃着烛火。到那儿还要排队才能进入一间三平方米左右的小殿，那儿只容四人，传说中安放着耶稣圣体。在巴以旅游的一路，有关耶稣的故事及神迹，我们听过不同的版本，此处只体现了其中一种说法。 轮到我们进入圣堂已是下午六点左右，后面排队的人群依然汹涌如潮。在圣堂执勤的是位年轻神职人员，穿戴着东…	2018-04-20	大公报	小公园	凡心	809
蔡少芬“港式普通话”爆红 内地剧乱rap网民激赞	http://www.stheadline.com/inews-content.php?cat=f&nid=89260	香港艺人北上掘金，不过未必个个普通话了得，多年前影帝古天乐的一句“轮胎能”成为经典。不过，最近蔡少芬的“港式普通话”就得到内地网民喜爱，一段乱RAP的剧集片段更在网上爆红，网民直呼可爱！ 蔡少芬在《甄嬛传》中角色打入内地观众心中，而且早前她在真人骚，娘娘变“凉凉”也被网民封为“蔡凉凉”。最新一辑剧集《海上嫁女记》启播，蔡少芬要用普通话RAP住开车，结果片方就为她配音了。可是网民们都十分好奇，“蔡凉凉”港式普通话原片到底RAP成什么样子，徇众要求下上载蔡少芬原声片段，惹来不少人爆笑。 后来蔡少芬再接受内地传媒访问，还笑说自己看完也不停笑，连家人都问“你在说（rap)甚么?”，还坚持自己的普通话“一直都不烂、一直都不错”，还笑说“为甚么每一个卷舌都必须要卷舌”，拍心口说自己的普通话完全没问题！但她也说“我真的挺开心，他们那么关注我的语言能力”，希望人家听得懂就行。 在访问中她也提及《甄嬛传》…	2018-04-19	头条日报	即时娱乐		473
蔡少芬“港式普通话”爆红内地剧乱rap网民激赞 10:09	http://std.stheadline.com/instant/articles/detail/694279-%E5%A8%9B%E6%A8%82-%E3%80%90%E7%89%87%E6%AE%B5%E3%80%91%E8%94%A1%E5%B0%91%E8%8A%AC%E3%80%8C%E6%B8%AF%E5%BC%8F%E6%99%AE%E9%80%9A%E8%A9%B1%E3%80%8D%E7%88%86%E7%B4%85+%E5%85%A7%E5%9C%B0%E5%8A%87%E4%BA	香港艺人北上掘金，不过未必个个普通话了得，多年前影帝古天乐的一句“轮胎能”成为经典。不过，最近蔡少芬的“港式普通话”就得到内地网民喜爱，一段乱RAP的剧集片段更在网上爆红，网民直呼可爱！ 蔡少芬在《甄嬛传》中角色打入内地观众心中，而且早前她在真人骚，娘娘变“凉凉”也被网民封为“蔡凉凉”。最新一辑剧集《海上嫁女记》启播，蔡少芬要用普通话RAP住开车，结果片方就为她配音了。可是网民们都十分好奇，“蔡凉凉”港式普通话原片到底RAP成什么样子，徇众要求下上载蔡少芬原声片段，惹来不少人爆笑。 后来蔡少芬再接受内地传媒访问，还笑说自己看完也不停笑，连家人都问“你在说（rap)甚么?”，还坚持自己的普通话“一直都不烂、一直都不错”，还笑说“为甚么每一个卷舌都必须要卷舌”，拍心口说自己的普通话完全没问题！但她也说“我真的挺开心，他们那么关注我的语言能力”，希望人家听得懂就行。 在访问中她也提及《甄嬛传》…	2018-04-19	星岛日报	即时娱乐		473
蔡少芬：人家听得懂就得 港式普通话乱rap网上爆红	http://premium.mingpao.com/cfm/Content_News.cfm?Channel=ma&Path=168506498655/maa1.cfm	【明报专讯】蔡少芬在内地发展多年，名利双收，但她的港式普通话却笑料百出，备受网民关注，更赞她可爱，成为独有卖点。近日她在播映中的内地剧集《海上嫁女记》一段边开车边rap的戏，剧组顺应观众要求分享她的“港普”rap版原声，在网上疯传，带给网民很多欢乐。蔡少芬接受访问说自己跟家人也看到笑，自觉很白痴，她当时不知rap什么？不过她要为自己的普通话平反：“其实一直都不烂的。” 娱乐组 蔡少芬被指已超越古天乐的“港普”首席位置，她之前在内地节目，将“义渠人”说成“一区人”，“近视”变“煎尸”，引得全场大笑。她在《海上嫁女记》这段开车乱rap戏，再令她此“港普”特色在网上爆红，“蔡少芬”加“港普”成为热门搜寻。她曾参演《甄嬛传》，被网民取笑称她“蔡凉凉”。 被取笑“蔡凉凉” 她接受内地传媒访问，谈到那段rap戏，她忍不住笑说：“我自己看也笑不停，我家人看了也在笑，问我在说什么？我觉得自己很白痴。剧本…	2018-04-19	明报	娱乐		976
大平反！蔡少芬普通话起势Rap (20:09)	http://m.on.cc/nc/ent/20180418/20180418200918en.html	【on.cc东网专讯】艺人蔡少芬与张家辉因为普通话麻麻，畀网友起晒花名“蔡凉凉”同“渣渣辉”，但他们的普通话，网民的反应可谓“愈烂愈爱”，好似之前蔡少芬拍《海上嫁女记》时，一幕边开车边Rap，便获不少观众关注，片方更顺应要求上载蔡少芬原声版，结果在网上疯传。 蔡少芬接受内地传媒访问时，提起此事，即笑言：“我自己看也笑不停。”她解释拍摄当日是听导演rap一次便要自己rap，自己根本都未完全听得懂便要上阵，但导演叫做甚么便胆粗粗照做，而她笑言自己的普通话其实不是太差的。	2018-04-18	东方日报	即时娱乐		250
港式普通话笑爆全场 蔡少芬：听懂就行了嘛	http://www.hkcd.com/content/2018-04/18/content_1086050.html	港式普通话的代表人物除了古天乐和张家辉，还有一位不得不提的蔡少芬。近段时间，蔡少芬因参与了许多综艺节目，让大家看到了一个不一样的“皇后娘娘”，她那一口港式普通话，可以说是直入人心，每次看到她讲话，都会不由自主的笑出声来，有媒体采访了蔡少芬。面对普通话的质疑，蔡少芬接受专访时回应，自己的普通话能听得懂就行了，得到大家的关注和喜爱很感动。 近年来，蔡少芬在内地发展势头迅猛，所参演的电视剧及真人秀节目更是广受欢迎，原因就是她搞笑不做作，展露真性情。再加上她不标准的港式普通话，每次出场，都能引发全场爆笑。 虽然普通话能力不佳，但是蔡少芬从未放弃，一直努力大胆讲出来。蔡少芬主演的《海上嫁女记》在内地热播。剧中她一边开车一边freestyle的rap视频在微博爆红，不少网友直呼“求原声视频”、“求港普rap”。 《海上嫁女记》蔡少芬大秀rap。影片截图蔡少芬接受专访时回应这段rap时直言，“我说的是…	2018-04-18	香港商报	即时新闻		582
【普通话教与学】两岸用语及读音有相似有不同	http://paper.wenweipo.com/2018/04/17/ED1804170011.htm	早前趁着复活节假期，我带孩子们到台湾地区旅行。因为自己是普通话老师，所以孩子们的普通话能力也因“近水楼台”，日常的基本对话都没有太大问题。台湾大多数人说的都是“国语”，跟普通话的发音非常相似，所以孩子在台湾跟人沟通几乎没有什么障碍。 香港人去台湾旅游，我相信有一件事是特别不习惯的就是扔垃圾。因为在台湾的街道上，是很难找到一个垃圾桶的。有一次，我们去逛夜市，买了很多小吃，吃完后有很多垃圾，但就是找不到垃圾桶。 我于是女儿就去问一位管理员，“劳驾，请问哪里有垃圾(la ji)桶？”那位管理员先是一愣，然后看看我女儿手上的垃圾，就说：“哦，你要丢垃圾(le se)，前面转弯就有。”我女儿回来告诉我，“原来普通话的垃圾(la ji)就是『国语』的垃圾(le se)。” 其实，“国语”有不少字的发音都跟普通话的发音是不一样的，比如“建筑”的“筑”普通话读第四声“zhu”，但是“国语”就读第二声“z…	2018-04-17	文汇报	新闻透视眼		1231
操普通话4人帮图爆窃云泉仙馆 警赶至拘1人 (12:01)	http://m.on.cc/nc/hknews/20180416/20180416120131lc.html	【on.cc东网专讯】打鼓岭坪輋路188号云泉仙馆，早上10时51分，职员发现有4名男子在馆内图撬开捐款箱，于是暗中报警，警方赶至时，在仙馆内拘捕一名可疑男子，怀疑与案件有关，将他带署调查。 据职员杨先生透露，早于上星期六已有善信反映，指见到4名操普通话的可疑人，在仙馆内游荡，行为鬼祟疑图扒窃，更曾摇晃捐款箱，因此职员已提高警觉。至今晨，有清洁工指见到4名可疑男子在云泉仙馆内出现，杨闻讯即带同近20名职员，在仙馆范围内四出巡视。 期间发现一名陌生男子坐在路边，于是立即上前查问：“你喺度做咩？呢度系私人地方！”同时着对方拿出身分证，该名男子支吾以对，又未能出示身分证，疑被“逼埋墙角”致发难，图出手袭击职员，杨反应迅速将其制服，并报警处理。该名男子疑听到要惊动警方，又再度发难，并成功突围而出逃去，不知所终。警员接报后赶至，再在仙馆范围内搜索，又寻获另一名可疑男子，初步调查后将其带返警署调查。	2018-04-16	东方日报	即时港闻		427
普通话生乱掉垃圾 触怒街坊 翌日返铺认错 (19:48)	http://m.on.cc/nc/hknews/20180413/20180413194823lc.html	【on.cc东网专讯】有小学生在大埔一间便利店内乱丢垃圾，职员屡劝无效，令街坊忍无可忍，拍下照片电邮至学校投诉，并发至网络让网民评理。岂料网上群情汹涌，大批街坊直指同类事件时有发生，最终点收科？ 有人周四（12日）在Facebook群组“Tai Po 大埔”发贴，指有几名操普通话的小学生，在大埔一间便利店吃完杯面后，“d（啲）垃圾掉到周地都系，该7仔员工一面执佢d（啲）垃圾，一面把垃圾掉落地”。该网民称，眼见学生屡劝不听，遂向校方发电邮投诉。 以为小事一桩？岂料大埔街坊反应甚大！该贴文吸引大批网民留言，直指经常见到有学生乱掉垃圾。记者到便利店附近向各街坊了解，有人说：“平时都好多人、好污糟，店员未必睇到咁多”。 校方得知事件后，校长及老师翌日即带同3名涉事学生，在放学后亲临便利店，向职员道歉。该校向记者派发新闻稿指，已就事件召开三至六年级全体学生特别早会，向学生交代事件经过及予以训话。 …	2018-04-13	东方日报	即时港闻		614
【普通话大世界】普粤同形异义 入班房变进牢房	http://paper.wenweipo.com/2018/04/10/ED1804100007.htm	小休时，笔者有时会和同学在走廊里聊聊天。快上课时，同学会说：“老师，我们该进班房了。”这话总会让我感觉怪怪的。“『进班房？』难道我们犯了罪，要蹲监狱了吗？” 在普通话中，“班房”指牢房，是监狱或拘留所的俗称。从词语的源头上看，“班房”最初是指官衙或私人府邸里差役们值班或休息的地方。《红楼梦》第五十一回《薛小妹新编怀古诗，胡庸医乱用虎狼药》就有：“彼时，李纨已遣人知会过后门上的人及各处丫鬟回避，那大夫祇见了园中的景致，并不曾见一女子。一时出了园门，就在守园门的小厮们的班房内坐了，开了药方。”后来，这个地方用来临时关押人了，所以才逐渐发展出“牢房”的含义。 在粤语中，“班房”就是教室。然而“教室”或“课室”多见于书面语，“班房”的使用范围不限于书面语，也被广泛用于口语中。细究因由，大概是源于英文classroom一词，若逐字翻译，class是班级之“班”，room是“房”，合而为一则为“班房…	2018-04-10	文汇报	新闻透视眼		1001
加州“公民警校”普通话授课	http://orientaldaily.on.cc/cnt/china_world/20180404/00180_038.html	【本报综合报道】为了帮助华人社区了解警察日常工作与环境、以及学习法律常识以保障自身权益，美国加州阿罕布拉市将于下月十六日至六月二十日举办首届以普通话授课的“公民警校”。 可与警同巡逻理解工作 阿罕布拉市警局当地周一公布详情，华人市长沈时康表示，这是美国首次有由普通话授课的“公民警校”。他强调，“公民警校”不是只有美国公民才能参与，阿罕布拉市居民和在市内就职的人士，都有资格参加这个课程。活动期间，参加者有机会与警员一同巡逻及处理突发事件，近距离感受警务工作。 “公民警校”起源于上世纪八十年代的美国，旨在促进社区更加理解和支持警方工作，令地区治安更好。以往该市公民警校只以英语授课，然而今年开始将提供普通话和西班牙语授课的课程。	2018-04-04	东方日报	国际		356
何勇邦识6种语言 冀懂普通话	http://invest.hket.com/article/2042657	懂得至少6种语言的何勇邦，曾于亚洲居住3年。他表示，欧洲人学普通话并不容易，我不知道自己能否再学懂更多新语言，但假若我懂得普通话，相信对集团拓展亚洲有很大帮助。 现时何勇邦的3名子女均已长大并搬到外面居住，让他有更多时间投入工作，到各地考察，与不同的人接触，了解其文化及观点，但他会尽力将周末留给太太及朋友。 拓亚洲无往不利 为拓展大中华业务，何勇邦每年来港3次，也会定期到内地。他指出，欧洲人学习法文、意大利文或西班牙文都很容易，这些语言有相似的文字及规则，但普通话则是全新的语言，故对他来说并不容易。 何勇邦的幼子目前正在大学学习普通话，他笑言，年轻人的学习速度及能力相对较高，不排除儿子未来会教他普通话，令他拓展亚洲市场时可更得心应手。 瑞士宝盛去年全球管理资产约3,880亿瑞郎（约3.19万亿港元），其中亚洲首次超越1,000亿瑞郎（约8,230亿港元），为集团第二大市场，去年增长逾30…	2018-04-03	经济日报	投资	陈韵妍	499
【普通话豁免试风波】学联及多间大专学生会联署 谴责浸大打压学生运动 09:11	http://news.mingpao.com/ins/instantnews/web_tc/article/20180403/s00001/1522717376482	浸大学生会前会长刘子颀、中医学系学生陈乐行及另外两名学生，因今年1月抗议普通话豁免试评分机制欠透明事件，被罚停学、服务令及写道歉信等，其中刘子颀和陈乐行表明会上诉。学联及多间大专院校学生会发表联署声明，强烈谴责浸大打压学生运动。 联署者包括学联、中大学生会、城大学生会、恒管学生会、树仁学生会临时行政小组、理大学生会、教大学生会临时行政委员会、珠海学院学生会、香港高等教育科技学院学生会。 声明指出，浸大向有关学生发出停学令，是对学生运动及学生自由的严厉打压，批评校方针对行动中的语言冲突，忽略了学生诉求，质疑浸大“以言入罪”惩处学生，是“政治清算”。 声明强调，学生运动是“义之所在”，期望港人声援学生，又说会“与极权斗争到底，直至人民胜利那一天”。 浸大昨回应称，根据纪律程序，学生如不同意小组判决，可提出上诉，重申大学绝对尊重学生和平、理性地表达意见权利。	2018-04-03	明报	即时港闻		435
【普通话豁免试风波】校董王凯峰：短时间停学属“攞正牌走堂” 09:59	http://news.mingpao.com/ins/instantnews/web_tc/article/20180403/s00001/1522718321767	浸会大学1月有学生不满普通话豁免试评分机制欠透明，到语文中心抗议时夹杂粗言，事后4名学生须出席纪律聆讯。前学生会会长刘子颀被罚停学一个学期；中医学系学生陈乐行则被罚停学8日及40小时服务令。浸大校董王凯峰表示，停学8日达不到阻吓作用，又指太短时间的停学只是象征性，是“不痛不痒”和“攞正牌走堂”，但他同时无法理解为何刘、陈二人所受的惩罚是“天渊之别”。 浸大校董王凯峰今日在港台节目时表示，罚则的考量是否有阻吓作用。王说，浸大的制度是学生出席率不会影响成绩，认为太短时间的停学只是象征性，是“不痛不痒”和“攞正牌走堂”。被问及陈乐行被罚停学8日是否太短，王回应，事情的重点应是行为具威吓性，而非粗口的部分，他又指刘子颀和陈乐行在事件中的角色性质差不多，无法理解二人被罚的程度“天渊之别”。王凯峰说，“8日达不到阻吓作用”，认为合理、具阻吓的惩罚停学应是“比较长少少，唔系长过一个学期啦”。 陈乐行在…	2018-04-03	明报	即时港闻		592
与特朗普通话 未提日俄 传习近平倡中美朝韩和平协定	http://www.singpao.com.hk/index.php?fi=news8&id=65892	据多名美中外交消息人士透露，中国国家主席习近平3月9日与美国总统特朗普通话讨论朝鲜半岛局势时，曾提议构建朝鲜半岛新安全架构，包括韩战主要当事国中美朝韩四国和平协定。《共同社》报道，有分析认为，这项提议可能考虑把联合国军与中国、朝鲜1953年签订的“朝鲜停战协定”转为和平协定。习近平未提及日本，有可能暗示朝韩以及美国与朝鲜领袖峰会后的相关谈判以四国为中心推进的想法。 本报国际组报道 特朗普未表示明确态度，似乎是向习近平提出维持对朝鲜施压的要求。习近平还强调了在围绕非核化的对朝鲜谈判中，中国参与的重要性。有分析认为，在迎来朝韩以及美国与朝鲜领袖峰会的对话氛围高涨情况下，中方有意在有关朝鲜核武与导弹问题谈判中确保主导权。 习近平其后与金正恩会谈 习近平在电话会谈中肯定“特金会”的举行将是解决朝鲜核问题的进展，同时强调朝鲜半岛的非核化重在长期工作，中国应该作为中间人发挥作用。除为验证非核化工作提…	2018-04-02	成报	国际两岸		929
【普通话豁免试风波】刘子颀批浸大“枪打出头鸟” 陈乐行：若上诉不果或司法覆核 14:44	http://news.mingpao.com/ins/instantnews/web_tc/article/20180402/s00001/1522651223260	浸会大学早前有学生到语文中心抗议普通话豁免试评分机制欠透明，其间有学生夹杂粗言。学生会前会长刘子颀及中医学系学生陈乐行，以及另外两名同学事后需接受纪律聆讯。 最终刘子颀被罚停学一个学期，并需接受大学辅导员的情绪辅导；陈乐行被判停学八日及四十小时服务令，两人均需于本月12日前向语文中心撰写道歉信；据悉另外两名同学亦需撰写道歉信，惟未有被罚停学，只被惩处服务令。 刘子颀和陈乐行均曾被暂时停学，但最后惩处不同，陈怀疑，与刘子颀于聆讯期间曾挑战程序有问题，以及自己早前提早结束广州的实习，已被建议休学两学期有关。陈又说，聆讯结果未有证明两人曾对校园师生构成威胁，惩处他停学8日未能为校长钱大康早前“未审先判”，勒令两人停学的决定开脱。 陈引述律师意见，指校方纪律聆讯权力来自《香港浸会大学条例》中第30(e)条，故纪律委员会的决策过程须符合普通法的程序公义，并指若上诉不果，不排除日后司法覆核。 刘子颀…	2018-04-02	明报	即时港闻		784
【网上热话】幼园疑限说普通话 促学生告发讲广东话同学 网民质疑属文革手段 11:07	http://news.mingpao.com/ins/instantnews/web_tc/article/20180402/s00001/1522636061056	在香港说广东话看似是理所当然的事，但原来在幼稚园，可能是一件需要向师长举报的错事。有钢琴老师在网上分享与学生谈天内容，惊揭有幼稚园要求学生禁讲广东话，而且更要求学生互相监察，如发现有违者就要告发。 其实，香港不少国际幼稚园标明采用英语及普通话教学，受不少家长追捧，但网民关心的是学校为何有告发的安排。 钢琴老师Sukie表示，这名学生来自内地家庭不懂说广东话，学琴时也是用普通话，平日上课时他们会谈天，一次听到学生说到曾告发说广东话的同学，指老师讲明“要说广东话的话就出去说，一旦发现了有同学讲广东话就要告发他”，令她觉得事态严重。 Sukie指她试以例子引导该名学生思考，望让他设身处地反思，反问学生如现在学琴不准说普通话一定要讲广东话，他会否觉得难受，学生坦言会，她随即说“那你那位讲广东话的同学也一样会很难受。你的学校要学生学会普通话不是问题，但是香港人讲广东话，这个有什么问题？” 她要求学…	2018-04-02	明报	即时港闻		1027
【普通话豁免试风波】浸大生刘子颀停学一学期 陈乐行停学8天须写道歉信 07:57	http://news.mingpao.com/ins/instantnews/web_tc/article/20180402/s00001/1522626183997	浸大学生会前会长刘子颀及中医学系学生陈乐行，因不满普通话豁免试评分机制欠透明等，一月中到语文中心抗议，其间有学生说话中夹杂粗言。刘子颀及陈乐行事后需接受纪律聆讯，据悉刘子颀被罚停学一个学期，而陈乐行需停学8天、撰写道歉信及于校内进行40小时服务。 陈乐行证实事件并表明会提出上诉。他表示，上星期四晚上收到学校发来的判决信电邮，阅读后认为“有严重的程序问题，内容不是基于事实”。他解释，信中提及的案情，如纪律委员会委员发现“中心职员曾重复呼吁同学离开语文中心”，以及形容他的手部动作“具威胁性”，批评两项并非事实的描述。 陈乐行称，中心职员“从没有叫我们离开”，又指描述其手部动作具威胁性的描述句带有主观色彩，并批评校方判决前，没有就该两项等内容询问过他与刘子颀，感觉如“畀人砌生猪肉”。 浸大学生会发出采访通知，指今天将举行记者招待会交代判决内容及后续行动。	2018-04-02	明报	即时港闻		420
狄维搵吴京教普通话	http://orientaldaily.on.cc/cnt/entertainment/20180330/00282_028.html	由于《红海行动》及《战狼Ⅱ》均在中国大收，近年在内地搵食的美国著名导演兰尼夏连（Renny Harlin）透露，将开拍同类型电影《索马里行动》。至于《战》片男主角吴京与荷里活男星狄维庄逊（Dwayne Johnson）拍短片，宣布狄维下月8日到上海宣传新片《末日困兽战》（Rampage），狄维更叫吴京教讲普通话。 另外，英皇电影《红海行动》票房报捷，于片中饰演通讯员“庄羽”的英皇艺人麦亨利演技亦备受注目，英勇牺牲的情节令观众看到眼湿湿。以跳唱偶像歌手形象出道的他，转战大银幕的表现令人惊喜。近日他拍摄网剧《PTU机动部队》，由邻家男孩的通讯员变身制服“警草”。	2018-03-30	东方日报	本地娱乐		297
【普通话大世界】“嗑瓜子”定“食花生”？ 围观群众“一家亲”	http://paper.wenweipo.com/2018/03/27/ED1803270011.htm	每次带学生朗读普通话水平测试60篇范文的时候，读到作品26号总会有一些特别的“笑点”。作品26号是著名作家许地山的代表作《落花生》。这篇作品以一家人种植、收获花生为线索，通过两代人的对话，带出花生“虽然不好看，可是有用，不是外表好看而没有实用的东西人要做有用的人，不要做只讲体面，而对别人没有好处的人”这个道理。文章虽短，意义却深远，一直是人们喜爱的名作佳篇。然而，在读到︰ 父亲说：你们爱吃花生吗？ 我们争着答应：爱！ 这两句话时，全班都哄堂大笑，就算是最害羞的女同学，也忍不住抿起嘴巴笑起来。 到底同学哄笑的原因是什么呢？原来就是“吃花生”这三个字！在香港的潮语中，“食花生”（吃花生）表示围观、看热闹的意思，同时还抱着看好戏的修辞效果。 地域各有选词 “看戏”不嫌事大 “吃花生”这个短语在内地的网络文化中又该用什么词语来表达呢？打开内地网页，在热点新闻或者热帖下面，除了有各种角度的解读和评…	2018-03-27	文汇报	新闻透视眼		1097
长泽正美学普通话扮大妈	http://stepaper.stheadline.com/news_content.asp?newsid=D05144.txt&newscat=D&newsdate=2018-03-27	日本女星长泽正美将会主演下月首播的富士电视台“月九”新剧《The Confidenceman JP》，在剧中她会连同男星东出昌大、老戏骨小日向文世扮演专业老千，以各种不同造型四处呃钱。在已公开了的剧照中，长泽扮演玛莉莲梦露、内地大妈、内地女星等，十分出位，她被指可能是拯救“月九”收视的救星。昨日长泽连同两名男拍档在东京出席该剧的记招，更招待观众率先观看第1集。 长泽表示相隔11年才再演“月九”，会落力演出，不负众望，东出则大赞长泽在剧中讲日本山形县乡下话之外，更为扮大妈学讲普通话，实在十分厉害。	2018-03-27	星岛日报	娱乐		265
长泽正美苦练普通话扮大妈 东出昌大激赞 (11:50)	http://m.on.cc/nc/ent/20180326/20180326115009en.html	【on.cc东网专讯】30岁日本女星长泽正美，相隔11年再为富士电视台担正“月9”重头剧《Confidence Man JP》，与东出昌大和小日向文世变身老千，设局骗取恶名昭彰的大富豪，叫人大快人心。 富士电视台对新剧十分期待和寄予厚望，希望为长期收视低迷的“月9”剧挽回声势，所以今日特别在台场搞了一个首集完成试映会，招待粉丝率先欣赏加长30分钟版本，力谷宣传，又邀请男女主角长泽正美及东出昌大、小日向文世现身试映会造势。 在剧中以百变造型亮相的正美，会以空姐、秘书、内地大妈、玛丽莲梦露及忍者20个造型演出，东出昌大力赞正美好努力，为了扮演大妈苦练普通话，讲得似模似样，加上造型神似十足大妈一样。而小日向文世则激赞正美的玛丽莲梦露造型好可爱。正美就话昨日拍摄期间看片段时，瞬间对套剧有些信心动摇，不过见到在场的工作人员拍手，又即刻对呢个剧信心大增。《Confidence Man JP》将于4月…	2018-03-26	东方日报	即时娱乐		435
渣渣辉翻Hit！张家辉港式普通话细路争模仿 (20:11)	http://m.on.cc/nc/ent/20180322/20180322201137en.html	【on.cc东网专讯】影帝级、视后级艺人张家辉、古天乐、蔡少芬拍摄的电影、广告、内地剧集一部又一部，全部向大陆巿场进发，好戏就当然，但要进军巿场，普通话真的要说得好。 多年前，古天乐于汽车广告中说的省姐能（省节能）、能太能（轮軚能）至今仍成为不少人的金句，而蔡少芬拍这么多内地剧，于内地真人骚重演《甄嬛传》时，出场自我介绍时的普通话唔赢古仔都打成平手。不过，张家辉于这方面亦毫不逊色，早前拍一个大陆网游自我介绍时一句“我四渣渣辉”简直冇得输，更于网络中疯传，就连三岁小孩都拿他来模仿！好明显，张家辉的“港普”已经成功挥抵古天乐！ 日前一个活动上，有内地传媒重提此事，问张家辉：“你知道大家都在喊你『渣渣辉』的事吗？你有甚么感受？”当时在旁一同接受访问的林嘉欣及刘青云都忍俊不禁，依家辉明显“（火罗）爆”尴尬地笑，但他亦大方回答该名记者：“我知道！但是我就一直不说，你们说的开心就好，我就一直不说，我…	2018-03-22	东方日报	即时娱乐		529
梁家辉俾自己普通话吓亲	https://www.am730.com.hk/news/%E5%A8%9B%E6%A8%82/%e6%a2%81%e5%ae%b6%e8%bc%9d%e4%bf%be%e8%87%aa%e5%b7%b1%e6%99%ae%e9%80%9a%e8%a9%b1%e5%9a%87%e8%a6%aa-119922	梁家辉出席节目《国家宝藏》推介会，看完宣传片，他笑言看到毛管都竖起来了：“唔系因为感动，系因为听到自己嘅普通话，唔打字幕都唔知自己讲咩。”从不参加综艺节目的他又笑说，从影三十多年，没试过有8亿观众，又指该节目超越一般综艺节目，可以用轻松模式，让人了解中国的祖先和文化。问到最想饰演的历史人物，他直言是轩辕黄帝或蚩尤，因为对那段历史甚为向往。	2018-03-21	am730	娱乐		172
【普通话教与学】鼓励再鼓励 成功不远矣	http://paper.wenweipo.com/2018/03/20/ED1803200011.htm	当我听到现在小学生或中学生说普通话的时候，心里真为香港普通话的推广充满了信心。培养学生的普通话表达能力，深入学习中国的文化，这也是老师们的教学目的。 我曾给中学生做普通话培训，他们大部分都很愿意参与相关活动。有一次上课，我如常先问学生来参加培训的目的，因为带着目的去学习，效果会事半功倍。 一部分同学说是喜欢普通话，但也有人告诉我：“我参加这个班是因为父母希望我的普通话说得好一点。”原来他们觉得学习普通话是为父母而学。 我听了之后，也没说什么。从第二节课开始，我在课堂上穿插一些普通话短片，有知识类的、搞笑类的，这些短片常常引得同学们哄堂大笑。 多表演比赛 增学习热情 慢慢地，同学们都开始喜欢普通话了，那些曾经为父母而学习普通话的学生，偶尔还用普通话跟我开玩笑，并开始对学习普通话表现出兴趣，所以我不断地鼓励他们，尽管发音上出现失误也要积极发言。 除了鼓励学生在课堂上发言以外，我还推动他们参加…	2018-03-20	文汇报	新闻透视眼		895
扮酒店职员入房盗窃警缉三普通话狡贼	http://stepaper.stheadline.com/news_content.asp?newsid=A13036.txt&newscat=A1&newsdate=2018-03-15	尖沙嘴金巴利道一家四星级酒店，前晚遭三名操普通话狡贼，假扮酒店职员“贼分多路”，分别赚门进入三名女游客的房间连环盗窃，共偷走二万六千元现金；警方正对案件展开调查，并根据“天眼”追缉三贼。 发生连环盗窃案现场为金巴利道二十八号一家四星级酒店。前晚十时许，三名中国籍男子分别往酒店二及三楼房间，以普通话向三名内地女游客（二十至二十七岁）讹称是酒店职员，藉词检查设施进入房间。 当三名“职员”离开后，事主各人均发现放在房间内的现金不翼而飞，遂向酒店了解，才知道并无安排职员入房，疑贼人假冒职员入房犯案，三人共损失约二万六千港元，酒店姓麦职员遂代为报案。 警员闻讯到场，经初步调查后获悉三事主各自租住房间，事发时独自在房内，将案件暂列盗窃处理，刻正展开进一步调查，并根据闭路电视录影，追缉三名年约三十至三十五岁中国籍男子归案，三人均瘦身材、身高约一点七米。案发酒店拒绝回应事件。 贼人打劫酒店房客事件，近年…	2018-03-15	星岛日报	港闻		517
关楚耀讲普通话闹笑料 “最紧要不怕面懵”	http://premium.mingpao.com/cfm/Content_News.cfm?Channel=ma&Path=134804497524/mbg1.cfm	【明报专讯】关楚耀、JW（王灏儿）与欧阳伟豪（Ben Sir）昨日接受港台访问，互相交流广东话及普通话。Ben Sir大赞关楚耀在节目上清唱了一小段普通话发音相当准，笑言听过后更肯定自己不能进乐坛。关楚耀称全因曾在台湾工作才练得好，回想当年经常讲错致笑料百出，最记得是将饮管说成啜筒。想学语言是否最好追当地女仔？他说：“这都有帮助，最紧要不怕面懵去讲。其实我的老师是周杰伦，因为经常跟他唱歌。” 问关楚耀及JW可会趁机邀Ben Sir为歌曲作词？Ben Sir称：“未试过，问我有无兴趣，当然有，等同问我有无兴趣中六合彩一样。”JW泼冷水说：“Ben Sir应做多点节目，对我们而言是好事，因能令我们学多点正确的中文字，现在很多年轻人说话有懒音甚普遍。”Ben Sir笑说：“那我就专心不唱歌，自己做回自己的事。”	2018-03-14	明报	娱乐	林祖杰	372
【普通话大世界】普通话交朋友 交流结“文化缘”	http://paper.wenweipo.com/2018/03/13/ED1803130011.htm	香港普通话研习社科技创意小学早前受中文大学雅礼中国语文研习所邀请，协办“语言路．文化缘”普通话国际交流活动。 在两天多元化的普通话互动活动中，本校学生运用普通话，跟不同国籍的大学生交流，更和来自德、日、韩、俄、美、英等国家的留学生结成了好朋友呢。 小学生们在筹备这次活动时相当投入，经过认真讨论，他们选择了向留学生介绍中国象棋、剪纸、猜灯谜、贺年金鱼制作、书法、水墨画、泡茶及贺年食品等内容。 活动那天，小学生们一早就在校门口欢迎这批来自不同国家的“大朋友”。这些中大的国际学生学习普通话的时间、掌握普通话的程度各有不同，但并不妨碍他们用普通话与香港的小学生沟通交流，介绍自己国家的风俗文化。 学书法制灯笼下象棋 小学生们耐心聆听之余，偶而还充当“小老师”去纠正一下他们的普通话发音。之后就轮到我们“主人家”向外国学生介绍中国传统活动了。外国学生可以轮流到不同小组学习书法、用“利是封”制作灯笼、下…	2018-03-13	文汇报	新闻透视眼		941
中大学生会会歌征粤语词 主办方：外来语普通话作会歌“于理不合” 13:12	http://news.mingpao.com/ins/instantnews/web_tc/article/20180309/s00001/1520569716106	中大学生会最高立法机构中大学生会代表会，周三（7日）晚上在Facebook公布举办“广东话会歌设计比赛”，为现时普通话版本的会歌征求粤语歌词。负责举办比赛的“广东话会歌、会章专责委员会”主席陈兆涛回覆《明报》查询时表示，以普通话这外来语言作为会歌歌词“着实于理不合”，希望藉此吸引本地同学关注广东话面临的威胁。 根据代表会在Facebook的帖文，填词比赛有3个评分准则，包括音准、歌词与学生会或中大之关系、歌词用语。作品提交限期是本月30日，比赛设冠亚季军，分别可获3000元、1500元或500元奖金。 “广东话会歌、会章专责委员会”主席陈兆涛回覆明报查询时表示，广东话作为香港人的母语，毫无疑问为香港文化核心载体；中大作为本地大学，本科生中港人占八成以上，对于以普通话此一外来语言作为会歌歌词“着实于理不合”，因此举办比赛，希望吸引本地同学关注广东话正面临威胁，同时进一步向外地生推广广东话。…	2018-03-09	明报	即时港闻		1167
普通话汉被指庭内拍摄 警查手机无发现	http://premium.mingpao.com/cfm/Content_News.cfm?Channel=gb&Path=168505571805/gbm3.cfm	【明报专讯】本案于上月审讯期间，自称“内地游客”的男子被发现在法庭内向陪审团方向拍摄，并将照片以微信发送出去，法官认为男子只是“无心之失”，吁陪审团毋须担心。惟陪审团前日散庭后，以纸条向法官表示有人在法庭向他们拍摄，法官随即将事件交警方跟进。警方调查后表示没有发现，法官再向陪审团指事件或属误会。据了解，被怀疑在庭内拍摄的男子操普通话。 前日禁传媒报道 法官彭宝琴前日散庭收到陪审团的纸条后，随即下令所有公众席人士不得离开，陪审团其后书面回覆彭官，该人士仍然在庭。彭官要求警方跟进，警方在庭上带走一名操普通话男子，并颁下报道禁令。 控方昨晨通知法庭，警方已完成法证调查，在男子手机内没有任何发现，亦没有任何已遭删除的备份，及没有证据显示男子将相片或影片发出。控方指因调查仍在进行中，促法官颁令禁止该男子进入法庭。 有被告的代表大律师反对，指没有任何基础颁令；另亦有大律师认为让该男子进入法庭，会令陪…	2018-03-08	明报	港闻		775
【梁天琦案】疑庭内拍照普通话男子遭带走警查手机未有发现 15:59	http://std.stheadline.com/instant/articles/detail/657530-%E9%A6%99%E6%B8%AF-%E3%80%90%E6%A2%81%E5%A4%A9%E7%90%A6%E6%A1%88%E3%80%91%E7%96%91%E5%BA%AD%E5%85%A7%E6%8B%8D%E7%85%A7%E6%99%AE%E9%80%9A%E8%A9%B1%E7%94%B7%E5%AD%90%E9%81%AD%E5%B8%B6%E8%B5%B0+%E8%AD	旺角骚乱案在高院续审，陪审团昨通知法官，怀疑庭内公众席上有男士向陪审团方向拍照。该名男士其后被警方带离法庭调查。法官今午向陪审团讲述结果，表示警方以法证检验方式，详细、深入地检视男士手机，未有发现该名男子曾经拍摄任何法庭内部影像，警方已暂停调查，著陪审团放心。 昨日审讯完结后不久，法官即召回控辩双方到庭，并指收到陪审团通知有人似乎在庭内拍照，随即下令所有公众席人士不得离开，亦不准使用任何电子器材，多名保安及执达主任亦站立监视公众席人士。10分钟后陪审团书面表示涉事人士仍然在庭，法官即下令警方将一名穿牛仔外套、戴眼镜、操普通话的男子带走调查。 涉事男子今早亦有到庭旁听，惟控方申请禁止该男子进入法庭内听审，以免影响陪审员。法官批准申请，但容许该男子在法庭延伸部份透过视像转播旁听。该男子其后由执达主任陪同下离开法庭。 午后控方表示警方已完成调查，证实涉事男士手机内没有法庭相片，申请容许该名男士…	2018-03-07	星岛日报	即时香港		514
【梁天琦案】疑庭内拍照普通话男子遭带走 警查手机未有发现	http://www.stheadline.com/inews-content.php?cat=a&nid=53615	旺角骚乱案在高院续审，陪审团昨通知法官，怀疑庭内公众席上有男士向陪审团方向拍照。该名男士其后被警方带离法庭调查。法官今午向陪审团讲述结果，表示警方以法证检验方式，详细、深入地检视男士手机，未有发现该名男子曾经拍摄任何法庭内部影像，警方已暂停调查，著陪审团放心。 昨日审讯完结后不久，法官即召回控辩双方到庭，并指收到陪审团通知有人似乎在庭内拍照，随即下令所有公众席人士不得离开，亦不准使用任何电子器材，多名保安及执达主任亦站立监视公众席人士。10分钟后陪审团书面表示涉事人士仍然在庭，法官即下令警方将一名穿牛仔外套、戴眼镜、操普通话的男子带走调查。 涉事男子今早亦有到庭旁听，惟控方申请禁止该男子进入法庭内听审，以免影响陪审员。法官批准申请，但容许该男子在法庭延伸部份透过视像转播旁听。该男子其后由执达主任陪同下离开法庭。 午后控方表示警方已完成调查，证实涉事男士手机内没有法庭相片，申请容许该名男士…	2018-03-07	头条日报	即时港闻		514
【梁天琦案】再有普通话男子涉庭内拍照警方法证检验证实无影 15:59	http://std.stheadline.com/instant/articles/detail/657530-%E9%A6%99%E6%B8%AF-%E3%80%90%E6%A2%81%E5%A4%A9%E7%90%A6%E6%A1%88%E3%80%91%E5%86%8D%E6%9C%89%E6%99%AE%E9%80%9A%E8%A9%B1%E7%94%B7%E5%AD%90%E6%B6%89%E5%BA%AD%E5%85%A7%E6%8B%8D%E7%85%A7+%E8%AD%A6%E6%96	旺角暴动案在高院续审，陪审团昨通知法官，怀疑庭内公众席上有男士向陪审团方向拍照。该名男士其后被警方带离法庭调查。法官今午向陪审团讲述结果，表示警方以法证检验方式，详细、深入地检视男士手机，未有发现该名男子曾经拍摄任何法庭内部影像，警方已暂停调查，著陪审团放心。 昨日审讯完结后不久，法官即召回控辩双方到庭，并指收到陪审团通知有人似乎在庭内拍照，随即下令所有公众席人士不得离开，亦不准使用任何电子器材，多名保安及执达主任亦站立监视公众席人士。10分钟后陪审团书面表示涉事人士仍然在庭，法官即下令警方将一名穿牛仔外套、戴眼镜、操普通话的男子带走调查。 涉事男子今早亦有到庭旁听，惟控方申请禁止该男子进入法庭内听审，以免影响陪审员。法官批准申请，但容许该男子在法庭延伸部份透过视像转播旁听。该男子其后由执达主任陪同下离开法庭。 午后控方表示警方已完成调查，证实涉事男士手机内没有法庭相片，申请容许该名男士…	2018-03-07	星岛日报	即时香港		514
【普通话教与学】抱疑学习 求证读音	http://paper.wenweipo.com/2018/03/06/ED1803060007.htm	有一天上课时，我建议学生：“课后尽jin量抽时间多看普通话节目，多听普通话歌曲，这样普通话能力就会提高得比较快。”有个普通话说得很好的同学就问我：“老师，你是不是说错了，『尽量』的『尽』应该是读第四声吧，我常听到大家读第四声。” 粤普字异 “尽”非“尽” 我告诉他，“你说得对，『尽』字读音确实是第四声『jin』，『尽量』我们经常在香港的报章、杂志上看到：学生最好少去人多的地方，尽量减低感染流感的机会。但普通话则很少会用『尽量』，我们一般会用读作第三声的『尽jin量liang』一词。” 不过，普通话里面也有“尽量”一词，基本上作动词用，是达到最大的限度的意思，如“喝了半斤白酒，还没尽量”，意思跟“尽量”不一样。 大家如果要参加普通话的考试，就一定要留意这个词语的读音，不要被粤语干扰而读错了。 这位学生一边听我解释，一边用手机上网寻找答案，然后信服地点了点头：“原来我把这两个字混淆了。” 大…	2018-03-06	文汇报	新闻透视眼		1200
涉挥刀吓官 装修工普通话喊“冤枉” 13:32	http://news.mingpao.com/ins/instantnews/web_tc/article/20180306/s00001/1520313930407	报称为装修工人的中年男子，去年于高等法院向法官亮出菜刀及叫喊，和损毁法官枱，被控管有攻击性武器和刑事损坏共3罪。案件今在区域法院提讯，被告在庭上2次以普通话向杜大卫法官说：“我是冤枉的。”案件押后至5月15日再提讯，待辩方向控方索取文件，期间被告仍须还押。 控罪指，被告余祖林（53岁）于去年10月17日在高等法院7楼13号庭内，威胁法官陈嘉信会使其人身遭受损害，意图使陈受惊，另涉嫌刑事损坏属于司法机构的法官枱，及在庭内管有攻击性武器、即菜刀，意图将其作非法用途。	2018-03-06	明报	即时港闻		248
涉刀吓法官装修工普通话喊冤 官回应Thank you (12:11)	http://m.on.cc/nc/hknews/20180306/20180306121108lc.html	【on.cc东网专讯】53岁装修男工去年10月被指带同新买菜刀闯入高等法院法官陈嘉信主审的法庭后，涉嫌亮刀恐吓陈官，又疑用刀劈向法官两米前的桌子，被控刑事恐吓、刑事毁坏及管有攻击性武器共三罪。案件今(6日)在区域法院提讯，辩方申请押后，以待向控方索阅文件。 被告余祖林期间举手以普通话表示“我跟法官说一句，我是冤枉的”，法官则指今天并非处理其是否有罪，被告再重复“我是冤枉的”，法官再回以一句“Thank you”，便将案押后至5月15日再讯，被告续还押看管。	2018-03-06	东方日报	即时港闻		245
诧异有学生不满学普通话 邝美云：内地有太多发展机会 15:14	http://news.mingpao.com/ins/instantnews/web_tc/article/20180305/s00001/1520233478842	浸大学生早前抗议普通话豁免试评分欠透明，引起外界关注学习普通话问题。港区人大代表、艺人邝美云表示，事件反映香港在德育教育有欠缺，希望学校设立德育评分，让学生以“善”互相影响。 邝美云接受《大公报》访问，谈到浸大学生抗议普通话考试时表示：“一个人时常暴躁，行为粗鲁，不仅影响你个人的人缘和事业，对别人也是一种伤害。”邝美云对部分学生不满学习普通话感到诧异：“很多人毕业出来都会把目光投放在内地，因为内地有太多发展机会。” 她强调学生“德育”比“知识”更重要，认为应恢复推行德育及国民教育科，亦要有针对德育的评分项目。 作为人大“新丁”参加全国两会，邝美云指，会关注香港和内地教育、慈善，希望“用生命影响生命”。她以2003年到宁夏山区助学作例：“我想给小朋友送电脑，但对方说没电，要送圆珠笔，对方又说没笔芯，用完就不能再写，然而，就算那么贫困，他们也没有抱怨，反而因为别人的一份心意，脸上露出幸福的表…	2018-03-05	明报	即时港闻		443
港龙延误惹普通话男吵闹 警调查时男客昏迷 (19:40)	http://m.on.cc/nc/hknews/20180303/20180303194032lc.html	【on.cc东网专讯】因管理不善而在全球最佳航空公司排名榜节节下跌的国泰航空，其全资附属公司国泰港龙再有航班延误。今日(3日)一班香港飞往南宁航班延误逾两小时，引发机上一名操普通话男子不满，据悉该男子在机上大吵大闹，机组人员报警求助，警方到场后发现一名中年男子昏迷，将该男子带离机舱。事件虽然平息，但航班未能成功起飞，料进一步延误至今晚8时后才启程。 东网收到市民梁先生报料指，其乘搭的国泰港龙编号KA714航班，原定今日下午3时40分起由香港前往南宁，但因当地机场繁忙而延误至今晚6时。梁先生指，当时已有大批乘客登机，当中怀疑有人“等到燥”在机上生事，一名操流利普通话的乘客大吵大闹，不满给了机票钱但飞机不能起飞，又投诉空姐态度有问题，声称自己肚饿，要求空姐马上派餐。 梁先生称，该名男子吵闹期间，空姐曾劝喻他别滋扰其他乘客，但对方未有理会，其后见最少两名军装警员登机处理事件。 警方回覆查询时证…	2018-03-03	东方日报	即时港闻		737
回应普通话试事件 钱大康：港生两文三语外亦宜学阿拉伯等语 16:14	http://news.mingpao.com/ins/instantnews/web_tc/article/20180302/s00001/1519977885803	浸大教职员工会主席、政治及国际关系学系助理教授黄伟国，早前接获校方通知，不获续约。浸大今日举行传媒春茗，校长钱大康说，不评论个别事件，同事有疑问可以申请覆核，但校方有既定标准，同一职位亦不应做很长时间，6至7年便应该定期检视。 黄伟国早前称获校方通知，不让他转职高级讲师，同时不与他续约，8月31日便要离职。钱大康说，不评论个别事件，惟部门主管及院长，对此有既定标准评核，同一职位每6至7年，亦应定时核视。至于由助理教授转职高级讲师，钱指并无此机制，主要是视乎相关职位有否空缺，申请时亦要“跟全人类竞争”。 浸会大学1月有学生不满普通话豁免试要求，到语文中心抗议，其间有学生言语中夹杂粗言，4名学生上月被传召出席纪录聆讯。钱大康说，纪律聆讯正进行中，不希望对聆讯有任何影响，故不会评论。 浸大早前成立两个工作小组，研究应否订立普通话要求等议题。钱指，正就普通话要求进行恒常检讨，又期望香港学生不应只…	2018-03-02	明报	即时港闻		478
【普通话大世界】米线“全走” 还要“拎走”	http://paper.wenweipo.com/2018/02/27/ED1802270015.htm	大学毕业后，我的同学们满腹理想，纷纷投身社会各行各业，在教育、经济、财务、商贸等社会不同领域发光发亮，我们每逢周末聚会时，大家都会找一家好吃的餐厅犒劳一下自己，畅谈南北趣事，一扫平日工作的紧张与压力，可见吃对人们生活的重要，正所谓“民以食为天”嘛。 无论是在旅客聚集的游客区，还是本地居民生活的住宅社区，米线已成为香港近年来街头巷尾非常流行的美食之一。我记得上个月在课堂上，曾请每位同学说一说自己最喜欢、最经常吃的美食，每个同学都踊跃回答，其中有一半以上的同学都说最常吃米线。我们讨论原因时，大家一致表示，原因有二，其一是价钱实惠，其二是方便快捷。 意思太广 沟通困难 说起米线店，便想到店内很多时会用到“走”字；广东话中“走”字用途颇广，常常用于与饮食有关的语境，但因为较普通话中“走”的意思更广，有时或会令旅客感到沟通困难。 进入米线店内，服务员一般都会问是堂吃还是“拎走”，这里的“走”表示拎…	2018-02-27	文汇报	南北直通车		1202
圣若瑟教普通话 遗憾中史科减堂	http://paper.wenweipo.com/2018/02/23/OT1802230002.htm	据周月龄介绍，当年圣若瑟每周有6堂中文、2堂中史及2堂普通话科，“当年的校长Bro. Thomas Favier是爱尔兰人，他却经常向我强调中史科的重要性，表示每个国家的人都应该了解自己国家的历史，所以这么多年圣若瑟从未缺过中史科。圣若瑟也是香港最早有普通话科的学校之一，我也是香港第一批教普通话的老师，当时还未有考证书这件事，我的普通话也是从母亲那里学来的。同时，校长也督促老师和学生学好普通话，他曾表示，将来的中国会日趋强大，所以一定要学生具备这项沟通的技能。” 周月龄现时每年都会回到圣若瑟教授文言文班，从同学那里了解到学校每周只剩一堂中史科，使教学进度缓慢，“曾经Form 1在9月开学，12月可以教到秦国统一，但现在1月才讲到战国。”周月龄笑着说，神情却难掩遗憾。	2018-02-23	文汇报	副刊		352
语言、文化与身分——普通话考试风波的宏观脉络	http://premium.mingpao.com/cfm/Content_News.cfm?Channel=fa&Path=101102902203/fac1.cfm	【明报文章】2018年1月17日，10多名浸大学生走到大学的语文中心，要求教职员解释普通话豁免试的评分标准。其间有学生情绪激动，说话用了粗口字及无礼字句。过了几天，校方针对参与此事的学生的纪律委员会未开会，就勒令两名学生暂时停课（2月1日校方撤销停学令）。这事已广泛报道，中方官媒《人民日报》及《环球时报》等国家机器亦迅速开动，将事件提升到“本土思潮侵蚀”、“『逢内地必反』的毒”等政治层次。至于笔者身边很多中年人士，就简单地把事件看成是“今天学生不尊重老师”的例证。本文想把事件还原到它的脉络，那就是语言、文化与身分。 事件源于校方与学生对于普通话应否列为必修科一事的争持。其实早于2013至2014年间，学界就已出现应否在中学用普通话教中文（所谓“普教中”）的争论。这次被停学的其中一名学生陈乐行，当年未进大学前就已参与反“普教中”运动，建立名为“港语学”的网上社交平台，批评教育局在这方面的措…	2018-02-20	明报	观点	蔡宝琼	2509
陈曼琪：学好普通话是民族、历史责任 16:59	http://news.mingpao.com/ins/instantnews/web_tc/article/20180219/s00001/1519030188873	学习普通话问题近日引起热论。反占中律师、当选港区人大代表的陈曼琪表示，学好普通话是民族、历史及中国人责任。 陈曼琪接受《港人讲地》访问指出，最近有一小撮青年抗拒学普通话，校园内亦有涉及“港独”言行，认为应阻止这些事情蔓延，强调“认同身分”对青年人、每个人都重要，学好普通话则是民族、历史、中国人责任。 陈曼琪另称，“守法依法”意思是“香港是国家一部分，言论自由集会自由，必须受制于国家安全及完整之下”，形容国家昌隆是作为中国人的光荣。	2018-02-19	明报	即时港闻		245
考国家试及格 不达校方要求 因普通话迟毕业 浸大生：盼有选择自由	http://premium.mingpao.com/cfm/Content_News.cfm?Channel=gb&Path=168504795255/gbk1.cfm	【明报专讯】香港浸会大学普通话毕业要求随上月学生抗议引发社会讨论。浸大指10年来只有少于5人纯粹因未符要求而延迟毕业，其中主修电影的张嘉倩就是其中一人，不能如期于去年底戴上四方帽，因不能获毕业证明，无法找全职工作。她质疑浸大要求高于日常沟通，亦盼大学给予学生选择的自由。 明报记者 刘家豪 四年级始抢到普通话课 考虑主修问题而退修 嘉倩原本读4年便可毕业，最后却读了4年半，多出的半年，不是要修读主修的电影课程，而是浸大必修的普通话课。嘉倩从二年级起都报读普通话，惟一直抢不到名额，至四年级上学期终成功报读，同时间却心仪另一名客席讲师的课程，考虑到工作量，决定退修普通话，“因为我读电影，下学期要拍摄电影毕业作品，很多时间不在校”，故她一心计划循另一途径，应考国家语委普通话水平测试，以该测试成绩，达至浸大毕业的要求。 去年7月底她获发成绩，结果为66.6分“三级乙等”的及格水平，但与浸大要求的“…	2018-02-15	明报	港闻		1248
跟进普通话课程浸大设工作小组	http://stepaper.stheadline.com/news_content.asp?newsid=A19052.txt&newscat=A1&newsdate=2018-02-13	上月浸会大学学生到校内语文中心抗议普通话豁免试，闹得满城风波，昨日浸大举行的教务议会，亦讨论了有关普通话课程事宜。有份出席的浸大学生会会长刘子颀会后表示，校方将设两个工作小组跟进，料六月有定案。 刘子颀称，校方终于承诺设立两个工作小组，分别讨论是否需要设立普通话要求，以及在没有普通话要求情况下如何确保学生普通话质素，希望于六月有定案，以便在下学年实施。他认为校方今次决定，与上月的抗议行动有关，指学校应一早完成检讨，现在只是“补救”；他又称“会尽最大的能力”争取废除普通话毕业要求。 浸大发言人确认，教务议会决定成立两个工作小组，分别检讨对毕业生的沟通能力要求，以及跟进毕业生普通话水平事宜，并指大学会按照学生的最佳利益为依归。	2018-02-13	星岛日报	维港会		343
浸大设两小组检讨普通话毕业要求	http://www.singpao.com.hk/index.php?fi=news1&id=61345	【本报港闻部报道】浸会大学早前有学生不满普通话豁免试及格率只得三成，“占领”该校语文中心要求交代评分准测，事件引致轩然大波，而浸大昨日则举行教务会议，讨论普通话毕业要求问题。有份参与教务会议的学生会会长刘子颀会后透露，校方决定设立两个工作小组进行检讨，估计今年6月会就是否取消普通话毕业要求作出决定。 刘子颀乐见校方处理问题 浸大教务会议昨日下午举行，商讨普通话豁免试评分机制，并决定设立两个工作小组，分别检视学生两文三语的毕业要求，以及商讨在没有普通话的毕业试要求下，如何得知学生的普通话能力，两个小组会在今年6月提交报告，而两个小组也会有学生会会长及前学生会会长作为学生代表参加。 两个小组将分别在今日以及本月22日举行会议，讨论职权问题，每个会议也将会有三名学生代表出席，刘子颀昨日表示，校方之前用“拖字诀”，现时乐见校方处理问题。 多名浸大学生早前在校内的语文中心抗议，期间有人用粗口辱骂教…	2018-02-13	成报	要闻港闻		547
浸大设小组跟进毕业生普通话水平	http://paper.wenweipo.com/2018/02/13/WA1802130005.htm	（记者 姜嘉轩）浸会大学昨日举行教务会议，讨论包括普通话毕业要求等安排。校方发言人会后表示，教务会议决定成立两个工作小组，分别检讨对毕业生的沟通能力要求，及跟进毕业生普通话水平事宜，与会的学生会会长刘子颀透露小组预计6月将向教务会议提交报告。刘声称是次安排让他“终于可在制度内倾到普通话毕业要求”，将尽最大努力争取取消，又扬言若检讨结果不符期望，“抗争将不设底线”云云。 浸大发言人昨晚发出有关消息，强调大学会按照学生的最佳利益为依归。刘子颀则在会后表示，校方原设检讨大学语言政策专责小组处理相关事宜，该小组昨已向教务会议提交文件，同意“学生应具备基本普通话能力”并获通过。不过他指，该小组并无权力讨论普通话毕业要求废存问题，校方遂再设立2个工作小组，“其中一个将假设在没有普通话毕业要求下，浸大可如何测试学生普通话能力；另一个则检讨学校两文三语政策，浸大学生是否需要有基本普通话能力”。 两文三语…	2018-02-13	文汇报	政情与网议		870
浸大设两小组 检讨普通话要求	http://orientaldaily.on.cc/cnt/news/20180213/00176_048.html	【本报讯】浸会大学普通话考试豁免率风波有新进展，浸会大学发言人指，教务议会于昨日会上决定成立两个工作小组，分别检讨对毕业生的沟通能力要求，以及跟进毕业生普通话水平，据悉，两个工作小组有浸大学生会会长刘子颀及前任会长作为学生代表。 刘子颀：抗争不设底线 刘子颀称两个工作小组会于六月提交报告，又批评校方之前采取拖字诀，今次愿意成立工作小组与早前校内语文中心抗议行动有关。 当问及若然校方六月提交报告结果未如人意，会否再次有抗议行动，刘子颀称不会为抗争设立底线，但现时会优先从制度内争取取消普通话毕业要求，并尽力游说其他教职员一同支持。 对于早前占领语文中心行动，一度遭到校方即时停学，刘子颀重申，校方早前对学生所采用的惩罚方法并不合适，又批评现时校方的做法令到学生不敢发声，在校园内制造“白色恐怖”，他要求校方作出保障学生言论自由的协议。	2018-02-13	东方日报	港闻		422
浸大设小组 检视普通话要求	http://paper.hket.com/article/2011481	浸大昨举行教务会议，浸大学生会长刘子颀会后指，会议商讨普通话豁免试评分机制，决定成立两个工作小组，分别检视学生两文三语的毕业要求，及商讨在没有普通话的毕业试要求下，如何得知学生的普通话能力，料会在6月就是否取消普通话毕业要求作决定。	2018-02-13	经济日报	港闻		118
浸大普通话毕业要求6月定夺	http://www1.hkej.com/dailynews/article/id/1768571/	浸大昨举行校务会议，决定成立两个工作小组检讨普通话语文政策，其中一个小组将聚焦毕业要求。学生会会长刘子颀透露，校方拒绝即时取消考试，无奈接受再经小组研究后，留待6月提交报告，并再由议会投票作最终决定。另会上有其他学生代表要求校长钱大康就上月语文中心示威惩处学生道歉，但对方以纪律委员会程序进行中为由，多次拒绝回应。	2018-02-13	信报	政坛脉搏		159
[truncated: 552 more rows]

## Sheet: 简体字
title	url	content	date	from	in	by	words
[truncated: 231 more rows]
